# Supplementary material
Source: Royal Society of Chemistry journal article supplement (doi:10.1039/d6cc01632d)
Supplement: d6cc01632d1.pdf [file d6cc01632d1.pdf]

## Supporting Information

### Mechanochemical NH<sub>4</sub>Cl-Mediated Hydrogen-Bonding Network

#### Reconstruction of HFIP: Enabling Yne-Allylic Substitutions

Qianzhi Yang,<sup>‡</sup> Xuguang Kong,<sup>‡</sup> Xin Liu, Qixing Liu, Linhong Zuo,\* and Haifeng Zhou\*

<sup>‡</sup>These authors contributed equally to this work.

Research Center of Green Pharmaceutical Technology and Process, Hubei Key Laboratory of Natural Products Re-search and Development

College of Biological and Pharmaceutical Sciences, China Three Gorges University, Yichang 443002, P.R.China

E-mail: [zhouhf@ctgu.edu.cn](mailto:zhouhf@ctgu.edu.cn); [zlh2023@ctgu.edu.cn](mailto:zlh2023@ctgu.edu.cn)

### Table of Contents

|                                                                                                    |      |
|----------------------------------------------------------------------------------------------------|------|
| 1 General comments.....                                                                            | S2   |
| 2 Typical procedures for the formation of 1,3-enyne product <b>2</b> , <b>3</b> and <b>4</b> ..... | S2   |
| 3 Typical procedures for the formation of 1,3-enyne product <b>5b-5l</b> .....                     | S3   |
| 4 Scale-up reaction and synthetic transformations of <b>5e</b> and <b>5g</b> .....                 | S4   |
| 5 Control experiments and mechanistic studies .....                                                | S6   |
| 6 <sup>1</sup> H, <sup>13</sup> C NMR and HRMS characterization data .....                         | S12  |
| 7 X-ray crystallographic analysis.....                                                             | S33  |
| 8 <sup>1</sup> H, <sup>13</sup> C NMR and HRMS characterization data .....                         | S43  |
| 9 References .....                                                                                 | S130 |

## 1 General comments

Commercially available reagents were purchased from Energy, Leyan, Bidepharm, Heowns or TCI, and used without further purification unless otherwise stated. All reactions were performed using grinding vessels in Changsha Vertical Planetary Ball Mill YXQM-0.4L. Both jars and balls were made of stainless steel or ZrO<sub>2</sub>. Hexafluoroisopropanol and other alcohols for reactions were purchased from commercial suppliers.

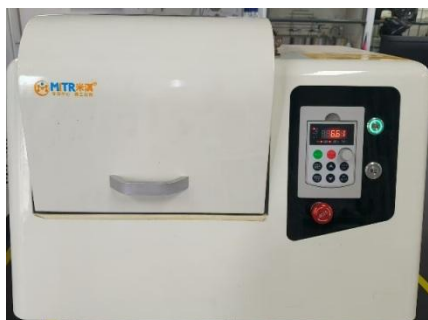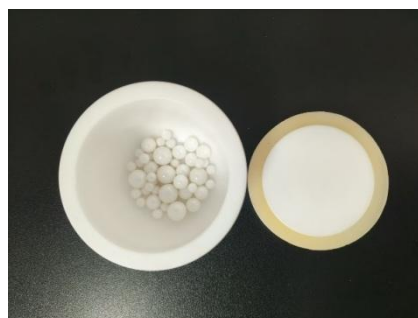

<sup>1</sup>H NMR and <sup>13</sup>C NMR spectra were measured on Bruker Avance 400 MHz instrument and chemical shifts ( $\delta$ ) were reported in parts per million (ppm). Chemical shifts were reported in ppm on the  $\delta$  scale relative to CHCl<sub>3</sub> ( $\delta = 7.26$  for <sup>1</sup>H NMR,  $\delta = 77.16$  for <sup>13</sup>C NMR), CD<sub>2</sub>Cl<sub>2</sub> ( $\delta = 5.32$  for <sup>1</sup>H NMR,  $\delta = 53.84$  for <sup>13</sup>C NMR). Coupling constants were reported in Hz with multiplicities denoted as s (singlet), d (doublet), t (triplet), q (quartet), m (multiplet). Single crystal X-ray diffraction analyses was carried out on SmartLab (9kW). High-resolution mass spectrometry (HRMS) data were obtained using an Agilent 6210 ESI/TOF mass spectrometer with molecular ions [M]<sup>+</sup>, [M+H]<sup>+</sup>, [M+Na]<sup>+</sup>, and [M+K]<sup>+</sup> reported in *m/z* units.

All reactions were monitored by thin layer chromatography (TLC) and visualized by UV irradiation or stained with 10% ethanolic phosphomolybdic acid (PMA) followed by brief heating with a heating gun. Column chromatography was performed on silica gel (200-300 mesh) using a mixture of petroleum ether/ethyl/ dichlorometh acetate as the eluent.

## 2 Typical procedures for the formation of 1,3-enyne product 2, 3 and 4

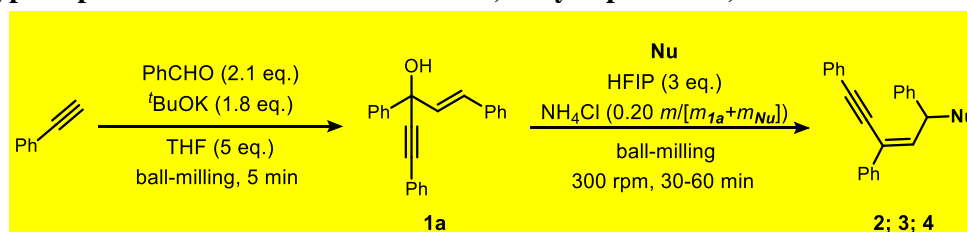

Phenylacetylene (1.2 mmol), benzaldehyde (2.4 mmol, 2.1 equiv) and <sup>t</sup>BuOK (2.16 mmol, 1.8 equiv) were placed in a ZrO<sub>2</sub> milling jar (50 mL) with 17 ZrO<sub>2</sub> balls (10 mm×2, 8 mm×5, 5 mm×10). Then THF (5 equiv) were added via a syringe. After the vessel was closed in air, the vessel was placed in the ball mill at 300 rpm. After 5 min, the jar was then opened. The mixture was extracted with ethyl acetate (5 mL × 3), and dried over anhydrous

Na<sub>2</sub>SO<sub>4</sub> to get crude product **1a**.

Crude product **1a** (1.2 equiv), nucleophiles (1 mmol) and NH<sub>4</sub>Cl [0.20 m/(m<sub>1a</sub>+m<sub>Nu</sub>)] were added to a ZrO<sub>2</sub> milling jar. Then HFIP (3 equiv) were added via a syringe. After the jar was closed, the jar was placed in Changsha Vertical Planetary Ball Mill YXQM-0.4L grinding for 0.5-1 h. After grinding, the mixture was dissolved in dichloromethane followed by filtration, and the crude product was purified by flash chromatography on silica gel (PE/DCM, v:v = 5:1) to to give the corresponding products.

### 3 Typical procedures for the formation of 1,3-enyne product **5b-5l**

Table S1 The optimization of reaction conditions.

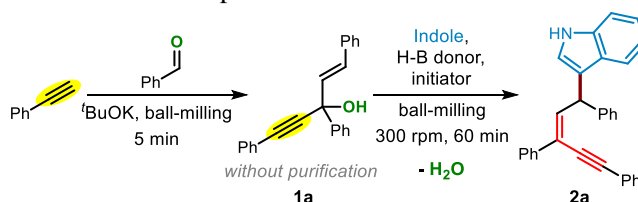

| Entry                 | H-B donor (equiv)                      | Mediator [m/(m <sub>1a</sub> +m <sub>Indole</sub> )] | Yield <sup>a</sup> [%] |
|-----------------------|----------------------------------------|------------------------------------------------------|------------------------|
| 1                     | BF <sub>3</sub> ·Et <sub>2</sub> O (2) | -                                                    | <5                     |
| 2                     | TFA (2)                                | -                                                    | <5                     |
| 3                     | <sup>i</sup> PrOH (2)                  | -                                                    | 0                      |
| 4                     | TFE (2)                                | -                                                    | 8                      |
| 5                     | HFIP (2)                               | -                                                    | 13                     |
| 6                     | HFIP (2)                               | NaCl (0.12)                                          | 39                     |
| 7                     | HFIP (2)                               | NH <sub>4</sub> Cl (0.12)                            | 56                     |
| 8                     | HFIP (2)                               | <sup>n</sup> Bu <sub>4</sub> NCl (0.12)              | 40                     |
| 9                     | HFIP (2)                               | NaOAc (0.12)                                         | 18                     |
| 10                    | HFIP (2)                               | NH <sub>4</sub> OAc (0.12)                           | 27                     |
| 11                    | HFIP (2)                               | NH <sub>4</sub> Cl (0.2)                             | 67                     |
| <b>12<sup>b</sup></b> | <b>HFIP (3)</b>                        | <b>NH<sub>4</sub>Cl (0.2)</b>                        | <b>87</b>              |
| 13 <sup>c</sup>       | HFIP (3)                               | NH <sub>4</sub> Cl (0.2)                             | 68                     |
| 14                    | -                                      | NH <sub>4</sub> Cl (0.2)                             | 0                      |
| <b>15</b>             | <b>HFIP (3)</b>                        | <b>NH<sub>4</sub>F (0.2)</b>                         | <b>44</b>              |
| <b>16</b>             | <b>HFIP (3)</b>                        | <b>NH<sub>4</sub>Br (0.2)</b>                        | <b>40</b>              |
| <b>17</b>             | <b>HFIP (3)</b>                        | <b>NH<sub>4</sub>I (0.2)</b>                         | <b>77</b>              |

General reaction conditions: **1a** (1.2 mmol), indole (1 mmol, 1 equiv), ball milling under air for 60 min.

Reactions were conducted in ZrO<sub>2</sub> milling jar (50 mL) at 300 rpm using 17 ZrO<sub>2</sub> balls: diameter 10 mm (2) + diameter 8 mm (5) + diameter 5 mm (10). <sup>a</sup>Isolated yield after silica gel column chromatography.

<sup>b</sup>The reaction was carried out for 30 min. <sup>c</sup>Stainless-steel balls were used.

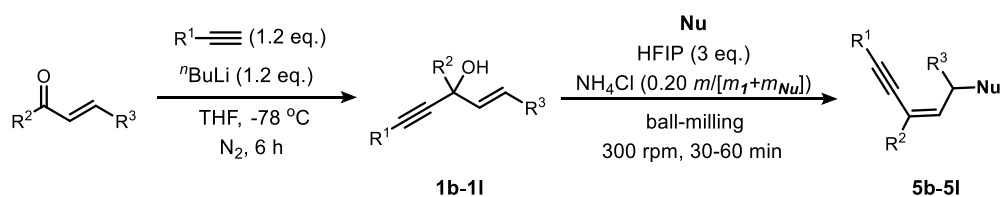

A solution of alkynes (18 mmol) in anhydrous THF (70 mL) was added to a flame dried two-necked round-bottom flask under nitrogen, followed by addition of *n*-BuLi (11.3 mL, 1.6 M in hexane, 18 mmol) with a syringe at -78 °C. The reaction mixture was stirred at 0 °C for 1 h, and then a solution of alkenyl ketone (15 mmol) in THF (30 mL) was added at -78 °C. After the reaction mixture was stirred at -78 °C for 5 h, it was quenched with NH<sub>4</sub>Cl (30 mL). The organics were extracted with EtOAc (3 × 60 mL), washed with brine, dried over Na<sub>2</sub>SO<sub>4</sub>, filtered and concentrated under reduced pressure. The crude allylic alcohol was used for the next step without further purification.

Crude product **1b-1l** (1.2 equiv), nucleophiles (1 mmol) and NH<sub>4</sub>Cl [0.20 m/(m<sub>1a</sub>+m<sub>Nu</sub>)] were added to a ZrO<sub>2</sub> milling jar. Then HFIP (3 equiv) were added via a syringe. After the jar was closed, the jar was placed in Changsha Vertical Planetary Ball Mill YXQM-0.4L grinding for 0.5-1 h. After grinding, the mixture was dissolved in dichloromethane followed by filtration, and the crude product was purified by flash chromatography on silica gel (PE/DCM, v:v = 5:1) to give the corresponding products.

#### 4 Scale-up reaction and synthetic transformations of **5e** and **5g**

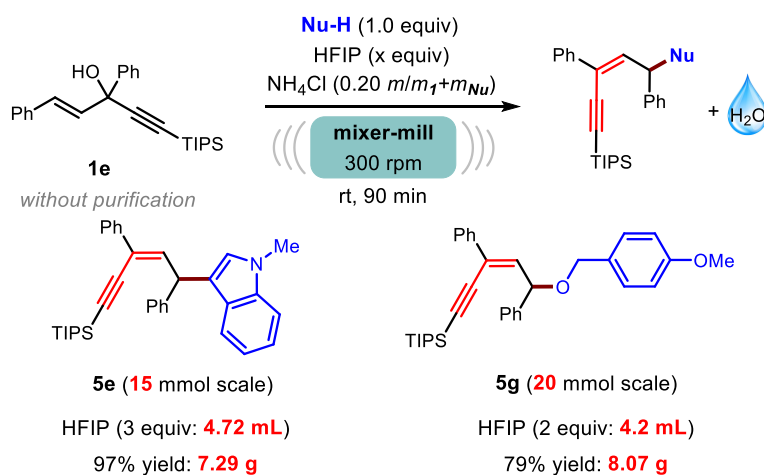

100 mL ZrO<sub>2</sub> jar  
17 ZrO<sub>2</sub> balls  
**1e** + Nu + HFIP + NH<sub>4</sub>Cl

Planetary Ball Mill  
300 rpm for 90 min

After reaction

Filtration & recrystallization  
**5e**

To a 100 mL ZrO<sub>2</sub> jar, equipped with 17 ZrO<sub>2</sub> balls (10 mm × 2, 8 mm × 5, 5 mm × 10), was added **1e** (7.02 g, 18 mmol, 1.2 equiv.), N-methylindole (1.97 g, 15 mmol, 1.0 equiv.), HFIP (4.72 mL, 45 mmol, 3.0 equiv.), and ammonium chloride (1.5 g). The jar was closed and mounted on the planetary mill, then milled at 300 rpm for 90 min. Upon completion, the crude reaction mixture was dissolved in a minimal amount of CH<sub>2</sub>Cl<sub>2</sub> and subjected directly to filtration followed by recrystallization from DCM/PE to give **5e** as an off-white solid (7.29

g, 97%).

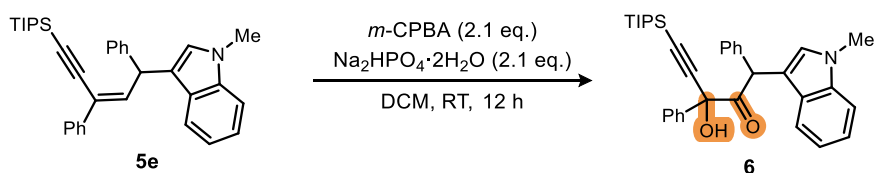

**5e** (75.5 mg, 0.15 mmol) was dissolved in DCM (2 mL) and the resulting solution was cooled to 0 °C. Then, *m*-CPBA (65 mg, 0.375 mmol) and Na<sub>2</sub>HPO<sub>4</sub> · 2H<sub>2</sub>O (66.8 mg, 0.375 mmol) were added in one portion. The reaction was kept at 0 °C for 2 h, at which point it was quenched with saturated Na<sub>2</sub>CO<sub>3</sub> aqueous solution. This biphasic mixture was stirred for 10 min and was then washed with saturated NaHCO<sub>3</sub> and brine. The organic layer was dried over anhydrous Na<sub>2</sub>SO<sub>4</sub>. After the removal of solvent under vacuum, the crude material was purified by silica gel column chromatography (hexane/ethyl acetate = 3/1). The product **6** was obtained as a brown viscous solid (44.2 mg, 55% yield, *dr* = 6.5:1) on silica gel (petroleum ether/ethyl acetate, v:v = 20:3).

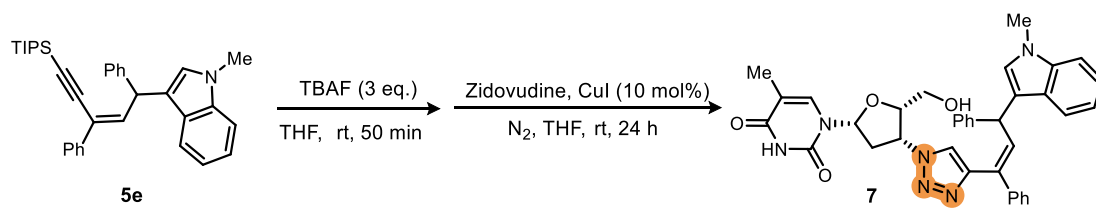

To a stirred solution of **5e** (100.6 mg, 0.2 mmol) in anhydrous THF (2 mL), TBAF (3 equiv) was then added dropwise via syringe. The reaction was stirred for 50 min and then quenched with a saturated aqueous ammonium chloride solution. The mixture was extracted with ethyl acetate (2 mL × 2). The combined organic layers were washed with brine, dried over anhydrous Na<sub>2</sub>SO<sub>4</sub>, and concentrated under reduced pressure. The crude product was purified by flash column chromatography (petroleum ether/ethyl acetate, v: v = 20:1) on silica gel to afford the desired desilylation product.

To a 10 mL Schlenk tube, CuI (3 mg, 0.015 mmol) and the desilylation product (62.5 mg, 0.18 mmol) were dissolved in freshly distilled THF (1 mL) at room temperature under argon atmosphere, then the solution of Zidovudine (42.5 mg, 0.15 mmol) in anhydrous THF (0.5 mL) was added via syringe. After the reaction was completed as monitored by TLC, the solution was quenched carefully with saturated NH<sub>4</sub>Cl solution and then warmed to room temperature. The product was extracted with ethyl acetate (5 mL × 3), and dried over anhydrous Na<sub>2</sub>SO<sub>4</sub>. After filtration and evaporation in vacuo, the residue was purified by flash chromatography on silica gel (petroleum ether/ethyl acetate, v: v = 1:1) to afford the product **7** (74 mg, 81% yield, >20:1 *dr*).

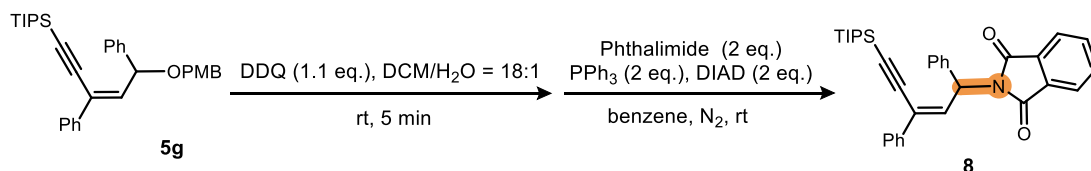

To a round bottom flask (10 mL) was charged with **5g** (46.8 mg, 0.2 mmol), DDQ (78 mg, 0.2 mmol) and DCM/H<sub>2</sub>O (18:1, 3.8 mL). The reaction mixture was stirred at room temperature for 5 min. Then the resultant reaction mixture was quenched by saturated Na<sub>2</sub>SO<sub>3</sub> and it was extracted with DCM (5 mL × 3) and washed with brine. The residue was purified by flash chromatography on silica gel (petroleum ether/ethyl acetate, v:v = 100:1) to afford the debenzylation product.

To a solution of debenzylation product (0.2 mmol), triphenylphosphine (105 mg, 2 equiv) and phthalimide (59 mg, 2 equiv) in anhydrous benzene (5 mL) was added a solution of diethyl azodicarboxylate (0.34 mL, 2 equiv) in anhydrous benzene (1 mL) over a period of 5 min, the reaction mixture was stirred for an additional 1 hour. Afterward, the resultant reaction mixture was quenched by water. The reaction mixture was extracted with ethyl acetate (5 mL × 3), and dried over anhydrous Na<sub>2</sub>SO<sub>4</sub>. The solvent was removed via rotary evaporation, yielding a viscous residue, the residue was purified by flash chromatography on silica gel (petroleum ether/ethyl acetate, v: v = 20:1) to afford the product **8** (38 mg, 37% yield).

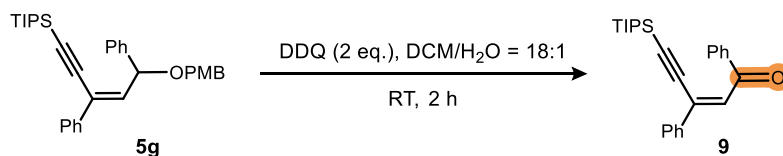

To a round bottom flask (10 mL) was charged with **5g** (76.6 mg, 0.15 mmol), DDQ (71.5 mg, 0.315 mmol) and DCM/H<sub>2</sub>O (18:1, 3.8 mL). The reaction mixture was stirred at room temperature for 2 hours. After that, the reaction was quenched by saturated Na<sub>2</sub>SO<sub>3</sub> and it was extracted with DCM (5 mL × 3) and washed with brine. The residue was purified by flash chromatography on silica gel (petroleum ether/ethyl acetate, v:v = 100:1) to afford the ketone product **9** (46.6 mg, 80% yield).

## 5 Control experiments and mechanistic studies

### 5.1 Attempted substitution reaction of **3v** with indole

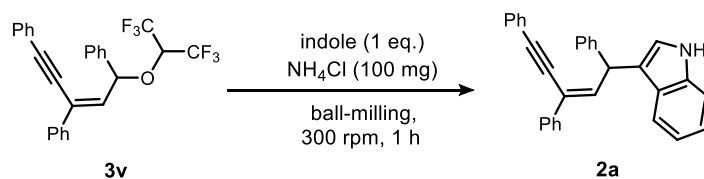

The hexafluoroisopropoxylation product **3v** (1.2 mmol), indole (1 mmol, 1 equiv) and NH<sub>4</sub>Cl (100 mg) were placed in a ZrO<sub>2</sub> milling jar (50 mL) using 17 ZrO<sub>2</sub> balls. After the

vessel was closed in air, the vessel was placed in the planetary ball mill at 300 rpm. After 60 min, the jar was then opened. After grinding, the mixture was monitored by TLC and the desired product **2a** was not detected.

## 5.2 Investigations on the effect of ammonium chloride on reaction efficiency

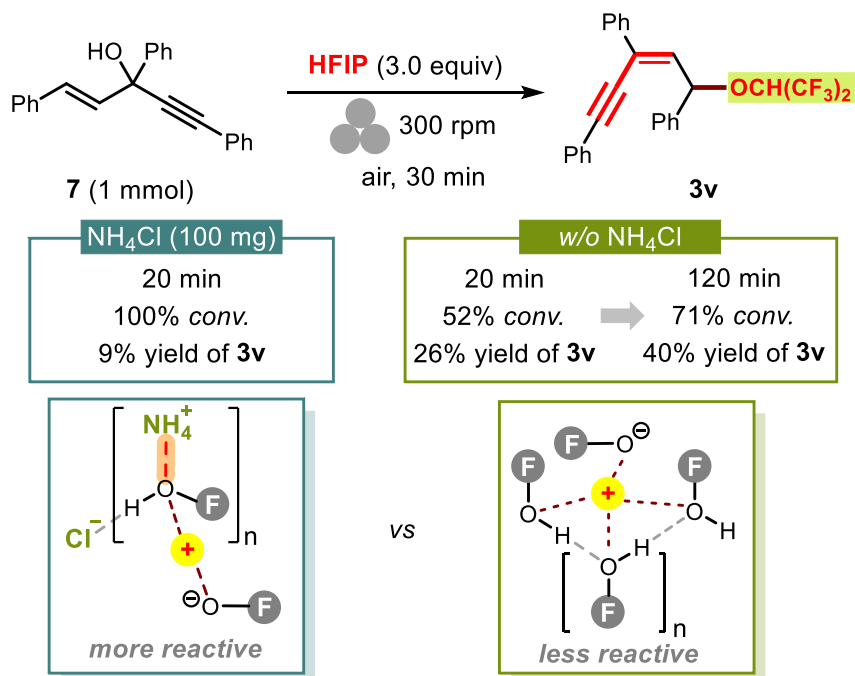

**1a** (1 mmol), NH<sub>4</sub>Cl (100 mg) and HFIP (3 mmol) were added to a 50 mL ZrO<sub>2</sub> milling jar containing 17 ZrO<sub>2</sub> balls in air and the jar was placed in planetary ball mill. After grinding for 20 min, **1a** was completely consumed. After filtration and evaporation in vacuo, the residue was purified by flash chromatography on silica gel (petroleum ether/ethyl acetate, v:v = 100:1) to afford the product **3v** (41 mg, 9% yield). Under otherwise identical conditions but in the absence of NH<sub>4</sub>Cl, the reactions were carried out for 20 min or 120 min, respectively. The yields and substrate conversion rates were then determined.

## 5.3 Investigation of the reactivity towards different ammonium salts and chlorides.

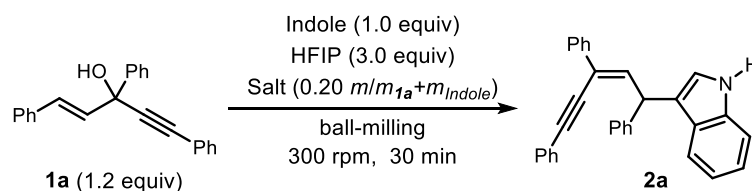

**1a** (1.2 mmol), indole (1 mmol, 1.0 equiv), HFIP (3 mmol), and salt (0.20  $m/m_{1a}+m_{indole}$ ) were added to a 50 mL ball mill jar. After grinding for 30 minutes, the mixture was dissolved in dichloromethane followed by filtration and purified by flash chromatography on silica gel (PE/DCM, v:v = 5:1) to afford the product **2a**. Herein, we examined nine different inorganic salts and NH<sub>4</sub>Cl gives the highest yield of 1,3-enyne product.

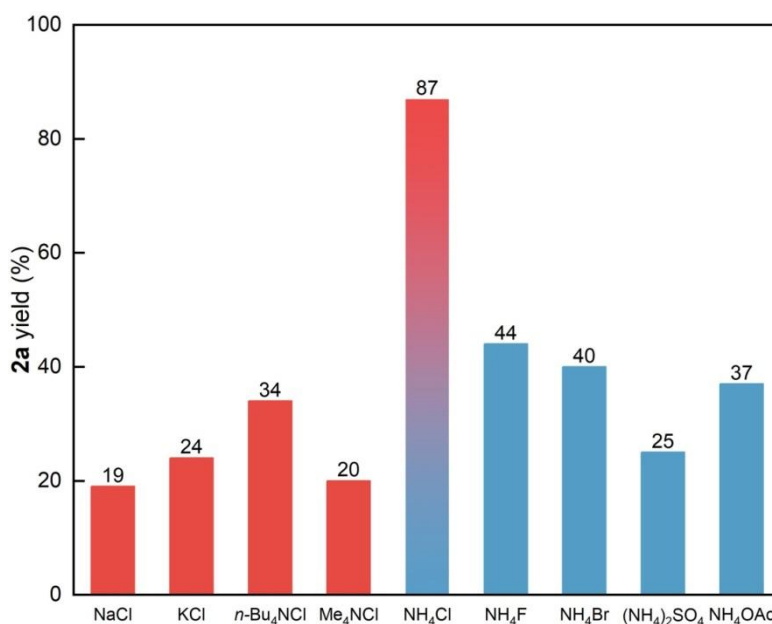

#### 5.4 XRD spectra of NH<sub>4</sub>Cl or reaction between NH<sub>4</sub>Cl and HFIP under ball-milling conditions.

NH<sub>4</sub>Cl (9.35 mmol, 500 mg) and HFIP (5 mmol, 1.57 mL) were placed in a ZrO<sub>2</sub> ball-milling jar (50 mL) loaded with grinding balls (ZrO<sub>2</sub>). After the reaction was milled at 300 rpm for 10 min, the milled sample was collected for X-ray diffraction (XRD) analysis. Then another parallel experiment was furnished without HFIP. X-ray diffraction (XRD) further confirmed structural changes. NH<sub>4</sub>Cl crystals exhibited distinct deviations in their diffraction patterns before and after milling.

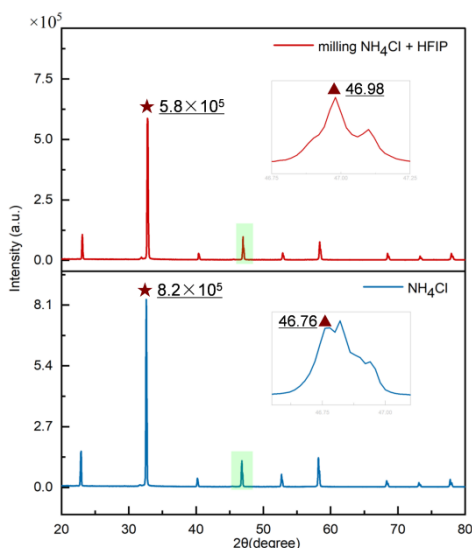

#### 5.5 Investigations of the changes in the acidity of HFIP caused by the introduction of NH<sub>4</sub>Cl during ball milling

The pH measurement experiment was conducted using a pH meter. The electrode was first calibrated with standard buffer solutions (pH values of 4.0, 7.0, and 10.0), followed by rinsing

with distilled water. Subsequently, ammonium chloride and hexafluoroisopropanol were ground for different durations (0, 3, 6, 9, and 12 minutes). After each grinding period, 5 mL of DMSO (or 5 mL of water) was immediately added, and the solution was thoroughly homogenized before the pH value was measured and recorded. A line graph was then plotted to illustrate the relationship between the pH values and the grinding time.

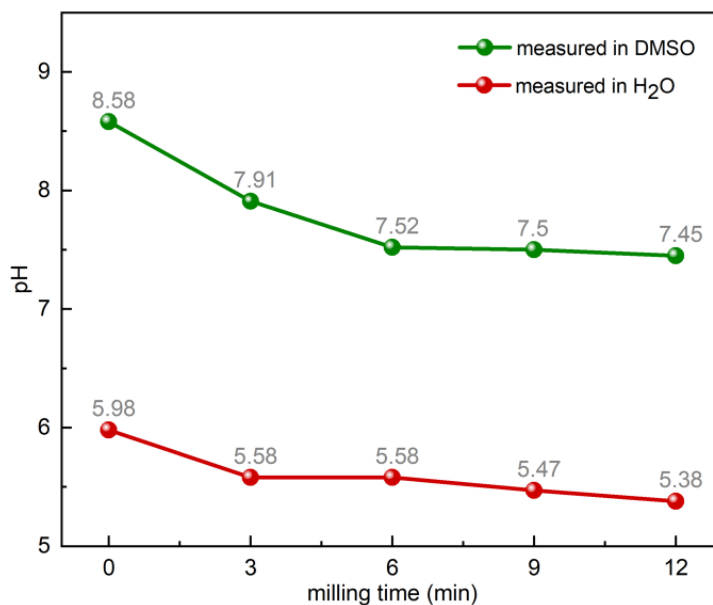

## 5.6 NMR experiments.

### 5.6.1 <sup>1</sup>H NMR of *n*-Bu<sub>4</sub>NCl, HFIP and binary milling or stirring mixture.

#### <sup>1</sup>H NMR (400 MHz, CDCl<sub>3</sub> with TMS)

<sup>1</sup>H NMR experiments of binary milling mixture were performed according to the following procedure: At first, HFIP (105 μL, 1 mmol) and <sup>n</sup>Bu<sub>4</sub>NCl (0.126 mmol) were placed in a ZrO<sub>2</sub> milling jar (25 mL) using ZrO<sub>2</sub> balls. After the vessel was closed in air, the vessel was placed in the planetary ball mill at 300 rpm. After 10 min, the resulting mixture was then diluted with CDCl<sub>3</sub> quickly. The samples were analyzed by <sup>1</sup>H NMR (400 MHz) with respect to the chemical shift of the hydroxyl proton of HFIP and ammonium moiety.

<sup>1</sup>H NMR experiments of binary stirring mixture were performed according to the following procedure: At first, HFIP (105 μL, 1 mmol) and <sup>n</sup>Bu<sub>4</sub>NCl (0.126 mmol) were placed in a nuclear magnetic tube. After mixing at room temperature for 10 min, the resulting mixture was then diluted with CDCl<sub>3</sub> quickly. The samples were analyzed by <sup>1</sup>H NMR (400 MHz) with respect to the chemical shift of the hydroxyl proton of HFIP and ammonium moiety.

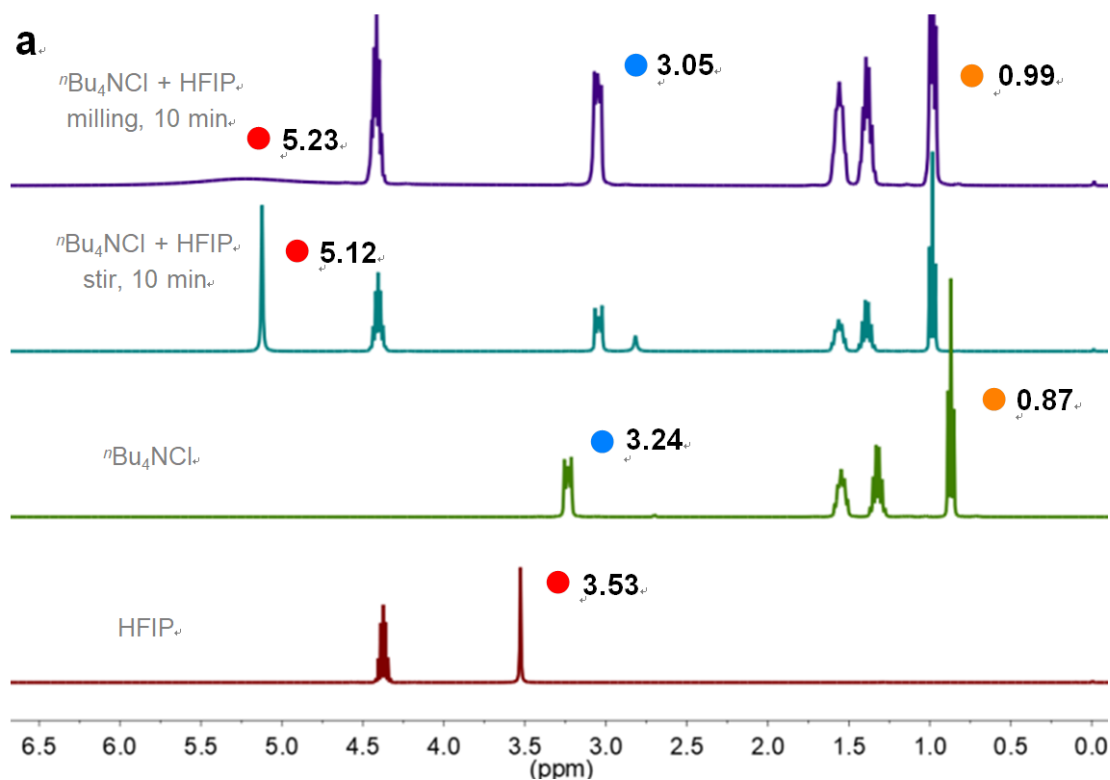

The most significant changes found in  $^1\text{H}$  NMR, for the binary milling mixture compared to the individual species, are the downfield shift of the OH, from a frequency of 3.53 ppm (sharp signals) to 5.23 ppm (broad signals) ( $\Delta = 1.70$ ) and the CH of HFIP, from a frequency of 4.38 ppm to 4.42 ppm ( $\Delta = 0.04$ ). Additionally, upfield shift of the  $\text{NCH}_2$ , from a frequency of 3.24 ppm to 3.05 ppm ( $\Delta = 0.19$ ), and downfield shift of the  $\text{CH}_3$ , from a frequency of 0.87 ppm to 0.99 ppm ( $\Delta = 0.12$ ) were observed.

These data support a H-bonding reconstruction between the ammonium and HFIP. Meanwhile, both the OH and the CH of HFIP are deshielded, what might indicate not only the H-bonding reconstruction between the chloridion and OH, but also some degree of interaction between the cationic  $n\text{-Bu}_4\text{N}^+$  and the hexafluoroisopropoxide moieties.

### 5.6.2 NOESY-2D experiment.

Additional support for the H-bonding reconstructions is found upon inspection of the NOESY-2D spectra of the milling mixture: HFIP (0.5 mmol) +  $n\text{-Bu}_4\text{NCl}$  (0.126 mmol). Upon completion of the grinding process (10 minutes),  $\text{CDCl}_3$  can be added to the mixture for the NOESY-2D experiment.

It was revealed that an apparent spatial correlation between both the  $\text{H}_a$  ( $\text{NCH}_2$ ) and  $\text{H}_b$  ( $\text{CH}_3$ ) of ammonium with the CH signals of HFIP.

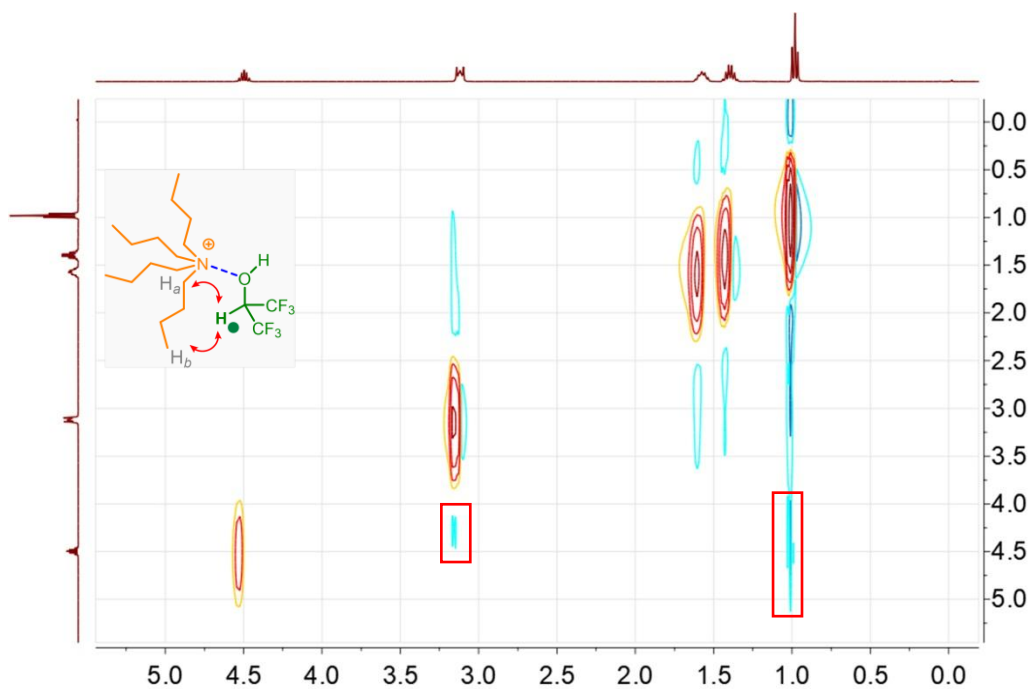

### 5.6.3 NMR titration experiments.

$^1\text{H}$  NMR titration experiments were performed according to the following procedure: At first, HFIP (126  $\mu\text{L}$ , 1 equiv) and various amount of  $\text{NH}_4\text{Cl}$  were placed in a  $\text{ZrO}_2$  milling jar (50 mL) using 17  $\text{ZrO}_2$  balls. After the vessel was closed in air, the vessel was placed in the

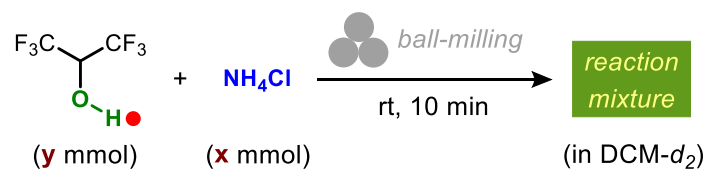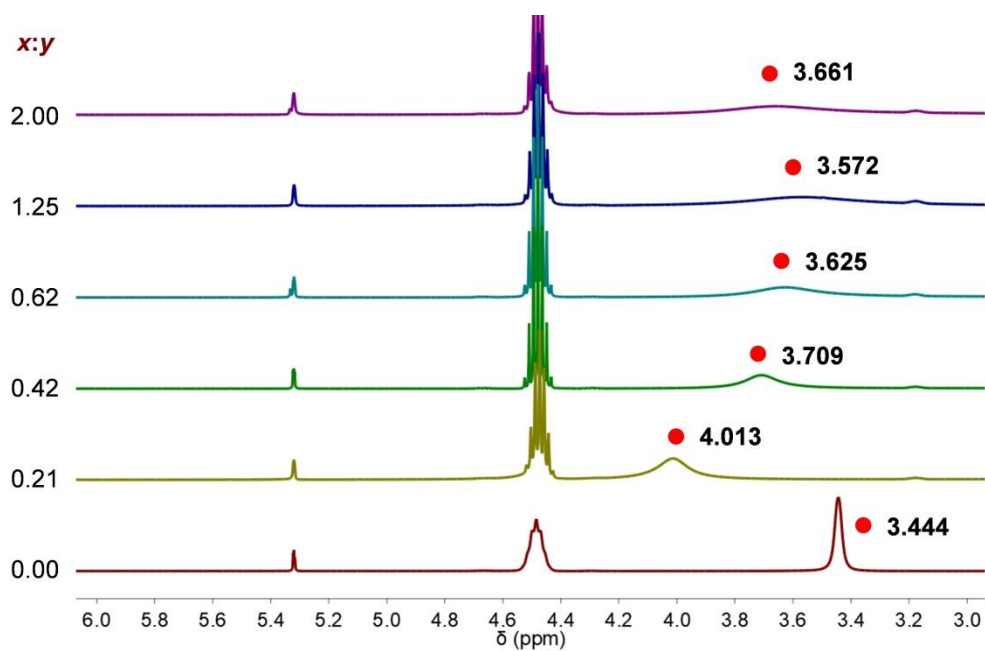

planetary ball mill at 300 rpm. After 10 min, the resulting mixture was then diluted with DCM- $d_2$  followed by filtration at the first opportunity. The samples were analyzed by  $^1\text{H}$  NMR (400 MHz) with respect to the chemical shift of the hydroxyl proton of HFIP.

### 5.7 Proposed mechanism.

Based on the above results, we propose a cascade mechanism involving anion-binding H-bonding network reconstruction and  $\text{NH}_4\text{Cl}$ -facilitated allylic cation formation (Scheme 6). Under mechanical force,  $\text{NH}_4\text{Cl}$  and HFIP form a cooperative complex, dynamically binding by chloride anions to generate a more acidic aggregated state of HFIP. Alcohol **1a** is protonated by activated HFIP, forming a highly reactive allyl cation, for which the negative charge of corresponding counterion appearing partially offset via ammonium ion bonding to oxygen. Nucleophile then rapidly attacks the allyl cation, subsequent proton abstraction and aromatization by the conjugate base of HFIP yield the thermodynamically favored enyne product (**Z**)-**2a**, with HFIP regenerated.

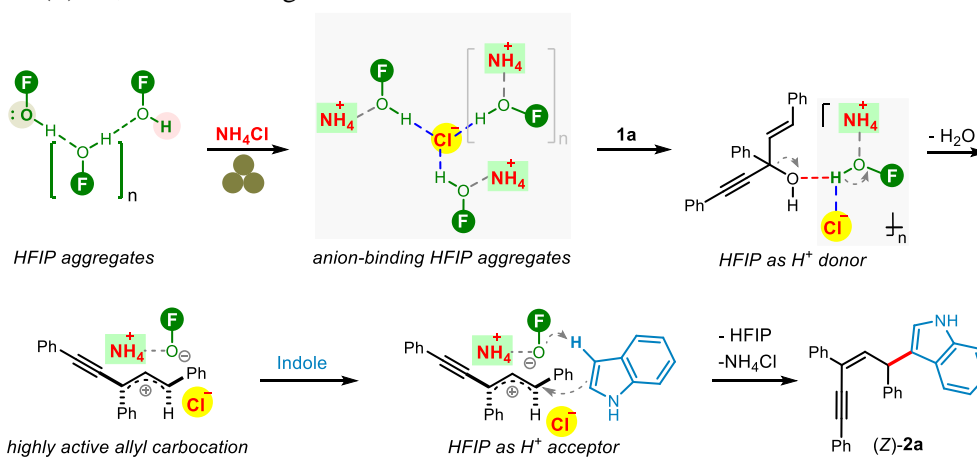

### 6 $^1\text{H}$ , $^{13}\text{C}$ NMR and HRMS characterization data

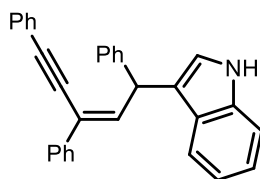

**(Z)-3-(1,3,5-triphenylpent-2-en-4-yn-1-yl)-1H-indole (2a)**: 356.3 mg, 87% isolated yield, green viscous solid,  $>20:1$  *Z/E*,  $R_f$  (PE/DCM = 5:1) = 0.3.

$^1\text{H}$  NMR (400 MHz,  $\text{CDCl}_3$ )  $\delta$  7.96 (s, 1H), 7.73-7.69 (m, 2H), 7.55-7.48 (m, 3H), 7.43-7.41 (m, 2H), 7.35-7.21 (m, 10H), 7.18-7.15 (m, 1H), 7.05-7.01 (m, 1H), 6.94 (d,  $J = 2.0$  Hz, 1H), 6.91 (d,  $J = 10.0$  Hz, 1H), 5.83 (d,  $J = 10.0$  Hz, 1H).

$^{13}\text{C}$  NMR (100 MHz,  $\text{CDCl}_3$ )  $\delta$  143.2, 139.7, 138.1, 136.8, 131.8, 128.7, 128.5, 128.4, 127.9, 127.0, 126.6, 126.5, 123.5, 123.3, 122.32, 122.28, 120.1, 119.7, 118.5, 111.3, 96.0, 86.9, 44.83.

HRMS (ESI $^+$ ): calcd. For  $[\text{C}_{31}\text{H}_{25}\text{N}]^+$  ( $M + \text{H}$ ) $^+$ : 410.1909, found: 410.1912.

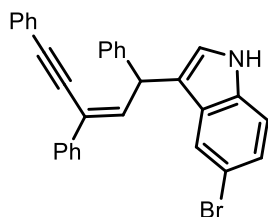

**(Z)-5-Bromo-3-(1,3,5-triphenylpent-2-en-4-yn-1-yl)-1H-indole (2b):** 429.8 mg, 88 % yield, brown solid, >20:1 *Z/E*,  $R_f$  (PE/DCM = 2:1) = 0.3.

$^1\text{H NMR}$  (400 MHz,  $\text{CDCl}_3$ )  $\delta$  7.93 (s, 1H), 7.68-7.63 (m, 1H), 7.61 (d,  $J$  = 1.6 Hz, 1H), 7.52-7.49 (m, 2H), 7.36-7.17 (m, 12H), 7.14-7.11 (m, 1H), 6.90 (d,  $J$  = 1.6 Hz, 1H), 6.81 (d,  $J$  = 10.0 Hz, 1H), 5.73 (d,  $J$  = 10.0 Hz, 1H).

$^{13}\text{C NMR}$  (100 MHz,  $\text{CDCl}_3$ )  $\delta$  142.8, 139.0, 137.9, 135.3, 131.8, 128.8, 128.7, 128.61, 128.55, 128.2, 128.0, 126.8, 126.5, 125.2, 123.53, 123.50, 123.2, 122.5, 118.2, 112.9, 112.7, 96.3, 86.7, 44.4.

**HRMS** ( $\text{ESI}^+$ ): calcd. For  $[\text{C}_{31}\text{H}_{24}\text{BrN}]^+$  ( $\text{M} + \text{H}$ ) $^+$ : 488.1014, found: 488.1015.

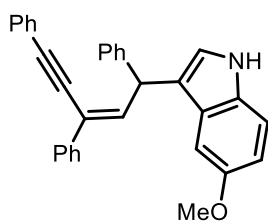

**(Z)-5-Methoxy-3-(1,3,5-triphenylpent-2-en-1-yl)-1H-indole (2c):** 246.2 mg, 56% yield, green solid, > 20:1 *Z/E*,  $R_f$  (PE/DCM = 2:1) = 0.3.

$^1\text{H NMR}$  (400 MHz,  $\text{CDCl}_3$ )  $\delta$  7.95 (s, 2H), 7.75-7.73 (m, 2H), 7.60-7.57 (m, 3H), 7.50-7.48 (m, 2H), 7.41-7.35 (m, 6H), 7.34-7.29 (m, 2H), 7.29-7.26 (m, 1H), 7.05 (d,  $J$  = 2.4 Hz, 1H), 6.95-6.85 (m, 2H), 5.85 (d,  $J$  = 10.2 Hz, 1H), 3.71 (s, 3H).

$^{13}\text{C NMR}$  (100 MHz,  $\text{CDCl}_3$ )  $\delta$  154.0, 143.0, 139.7, 138.1, 131.8, 131.7, 128.7, 128.54, 128.52, 128.4, 127.9, 127.5, 126.7, 126.5, 123.5, 123.2, 123.1, 118.3, 112.6, 111.9, 101.7, 96.0, 87.0, 55.8, 44.8.

**HRMS** ( $\text{ESI}^+$ ): calcd. For  $[\text{C}_{32}\text{H}_{27}\text{NO}]^+$  ( $\text{M} + \text{H}$ ) $^+$ : 440.2016, found: 440.2011.

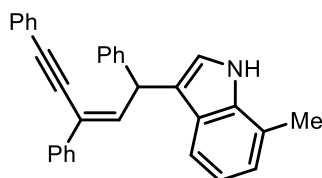

**(Z)-7-Methyl-3-(1,3,5-triphenylpent-2-en-1-yl)-1H-indole (2d):** 321.9 mg, 76% yield, green solid, > 20:1 *Z/E*,  $R_f$  (PE/DCM = 2:1) = 0.3.

$^1\text{H NMR}$  (400 MHz,  $\text{CDCl}_3$ )  $\delta$  7.96 (s, 1H), 7.73-7.71 (m, 2H), 7.58-7.53 (m, 2H), 7.45-7.44 (m, 2H), 7.40-7.23 (m, 10H), 7.01-6.92 (m, 4H), 5.86 (d,  $J$  = 10.0 Hz, 1H), 2.50 (s, 3H).

$^{13}\text{C}$  NMR (100 MHz,  $\text{CDCl}_3$ )  $\delta$  143.3, 139.7, 138.1, 136.3, 131.8, 131.6, 128.6, 128.50, 128.49, 128.4, 127.9, 126.6, 126.5, 123.5, 123.2, 122.8, 122.0, 120.4, 119.9, 118.9, 117.9, 95.9, 86.9, 44.9, 16.8.

HRMS (ESI<sup>+</sup>): calcd. For  $[\text{C}_{32}\text{H}_{27}\text{N}]^+$  (M + H)<sup>+</sup>: 424.2067, found: 424.2063.

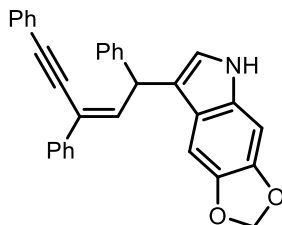

(Z)-7-(1,3,5-Triphenylpent-2-en-4-yn-1-yl)-5H-[1,3]dioxolo[4,5-f]indole (**2e**): 181.4 mg, 40% yield, brown liquid, > 20:1 Z/E,  $R_f$ (PE/DCM = 5:2) = 0.5.

$^1\text{H}$  NMR (400 MHz,  $\text{CDCl}_3$ )  $\delta$  7.84 (s, 1H), 7.77-7.72 (m, 2H),  $\delta$  7.59-7.56 (m, 2H), 7.46-7.29 (m, 11H), 6.95 (s, 1H), 6.86 (d,  $J$  = 10.0 Hz, 1H), 6.76 (s, 1H), 6.24 (s, 1H), 5.90 (s, 2H), 5.72 (d,  $J$  = 10.0 Hz, 1H).

$^{13}\text{C}$  NMR (100 MHz,  $\text{CDCl}_3$ )  $\delta$  144.5, 142.9, 141.3, 138.6, 137.6, 136.9, 131.8, 131.0, 129.1, 128.8, 128.61, 128.59, 128.5, 128.3, 127.4, 126.5, 124.5, 123.1, 122.3, 101.3, 100.5, 99.1, 96.2, 92.0, 86.4, 47.0.

HRMS (ESI<sup>+</sup>): calcd. For  $[\text{C}_{32}\text{H}_{25}\text{NO}_2]^+$  (M + H)<sup>+</sup>: 454.1809, found: 454.1804.

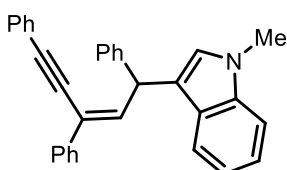

(Z)-1-Methyl-3-(1,3,5-triphenylpent-2-en-4-yn-1-yl)-1H-indole (**2f**): 402.4 mg, 95% yield, white solid, > 20:1 Z/E,  $R_f$ (PE/DCM = 2:1) = 0.3.

$^1\text{H}$  NMR (400 MHz,  $\text{CDCl}_3$ )  $\delta$  7.77-7.75 (m, 2H), 7.62-7.54 (m, 3H), 7.50-7.48 (m, 2H), 7.42-7.24 (m, 11H), 7.10-7.06 (m, 1H), 6.96 (d,  $J$  = 10.0 Hz, 1H), 6.86 (s, 1H), 5.89 (d,  $J$  = 10.0 Hz, 1H), 3.78 (s, 3H).

$^{13}\text{C}$  NMR (100 MHz,  $\text{CDCl}_3$ )  $\delta$  143.4, 139.8, 138.0, 137.5, 131.7, 128.7, 128.5, 128.3, 127.9, 127.3, 127.0, 126.6, 126.4, 123.5, 123.0, 121.8, 120.1, 119.1, 116.8, 109.4, 95.9, 86.9, 44.8, 32.8.

HRMS (ESI<sup>+</sup>): calcd. For  $[\text{C}_{32}\text{H}_{25}\text{NNa}]^+$  (M + Na)<sup>+</sup>: 466.1885, found: 446.1879.

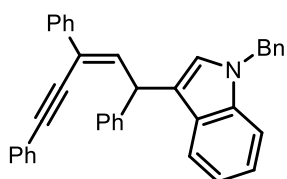

(Z)-1-Benzyl-3-(1,3,5-triphenylpent-2-en-4-yn-1-yl)-1H-indole (**2g**): 399.7 mg, 80% yield,

white solid, > 20:1 *Z/E*,  $R_f$ (PE/DCM = 2:1) = 0.3.

$^1\text{H NMR}$  (400 MHz,  $\text{CDCl}_3$ )  $\delta$  7.71-7.69 (m, 2H), 7.53-7.51 (m, 3H), 7.45-7.43 (m, 2H), 7.34-7.29 (m, 7H), 7.27-7.20 (m, 6H), 7.17-7.10 (m, 1H), 7.10-7.04 (m, 2H), 7.03-7.00 (m, 1H), 6.94-6.88 (m, 2H), 5.86 (d,  $J = 10.0$  Hz, 1H), 5.24 (s, 2H).

$^{13}\text{C NMR}$  (100 MHz,  $\text{CDCl}_3$ )  $\delta$  143.3, 139.7, 138.0, 137.7, 137.2, 131.8, 128.8, 128.7, 128.5, 128.3, 127.9, 127.7, 127.6, 126.7, 126.60, 126.58, 126.4, 123.4, 123.1, 122.0, 120.3, 119.4, 117.4, 109.9, 50.1, 44.8.

**HRMS** (ESI<sup>+</sup>): calcd. For  $[\text{C}_{38}\text{H}_{29}\text{NNa}]^+$  ( $M + \text{Na}$ )<sup>+</sup>: 522.2198, found: 522.2201.

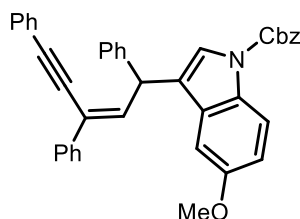

**Benzyl (Z)-5-methoxy-3-(1,3,5-triphenylpent-2-en-4-yn-1-yl)-1H-indole-1-carboxylate (2h)**: 177.8 mg, 31% yield, yellow solid, > 20:1 *Z/E*,  $R_f$ (PE/DCM=5:2) = 0.4.

$^1\text{H NMR}$  (400 MHz,  $\text{CDCl}_3$ )  $\delta$  8.04 (s, 1H), 7.71-7.69 (m, 2H), 7.55-7.52 (m, 2H), 7.48-7.46 (m, 2H), 7.43-7.25 (m, 15H), 6.93-6.89 (m, 2H), 6.81 (d,  $J = 10.0$  Hz, 1H), 5.72 (d,  $J = 10.0$  Hz, 1H), 5.43 (s, 2H), 3.67 (s, 3H).

$^{13}\text{C NMR}$  (100 MHz,  $\text{CDCl}_3$ )  $\delta$  156.0, 141.7, 137.9, 137.8, 135.4, 131.8, 128.90, 128.86, 128.8, 128.7, 128.60, 128.58, 128.3, 128.2, 127.0, 126.5, 124.2, 123.6, 123.2, 116.2, 113.4, 103.1, 96.5, 86.6, 68.7, 55.6, 44.5.

**HRMS** (ESI<sup>+</sup>): calcd. For  $[\text{C}_{40}\text{H}_{31}\text{NO}_3\text{Na}]^+$  ( $M + \text{Na}$ )<sup>+</sup>: 596.2202, found: 596.2206.

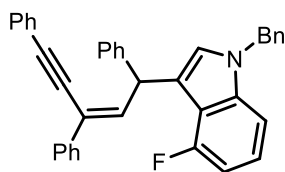

**(Z)-1-Benzyl-4-fluoro-3-(1,3,5-triphenylpent-2-en-4-yn-1-yl)-1H-indole (2i)**: 429.6 mg, 83% yield, white solid, > 20:1 *Z/E*,  $R_f$ (PE/DCM = 5:2) = 0.65.

$^1\text{H NMR}$  (400 MHz,  $\text{CDCl}_3$ )  $\delta$  7.73-7.66 (m, 2H), 7.51-7.48 (m, 2H), 7.38-7.37 (m, 2H), 7.35-7.15 (m, 12H), 7.09-7.03 (m, 2H), 7.03-6.94 (m, 4H), 6.72-6.65 (m, 1H), 6.03 (d,  $J = 10.0$  Hz, 1H), 5.22 (s, 2H).

$^{13}\text{C NMR}$  (100 MHz,  $\text{CDCl}_3$ )  $\delta$  157.1 (d,  $J = 246.7$  Hz), 144.3, 139.9, 139.83 (d,  $J = 1.6$  Hz), 139.80, 138.1, 137.2, 131.8, 128.9, 128.5, 128.4, 127.92, 127.88, 127.8, 126.7, 126.6, 126.42, 126.35, 123.1 (d,  $J = 86.1$  Hz), 123.3, 122.6, 116.2 (d,  $J = 20.1$  Hz), 115.8 (d,  $J = 3.7$  Hz), 106.0 (d,  $J = 3.6$  Hz), 104.9 (d,  $J = 19.8$  Hz), 96.0, 86.9, 50.4, 44.8.

**HRMS** (ESI<sup>+</sup>): calcd. For [C<sub>38</sub>H<sub>28</sub>FNK]<sup>+</sup> (M + K)<sup>+</sup>: 556.1843, found: 556.1838.

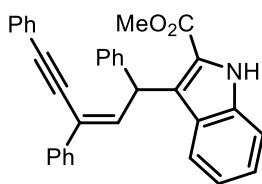

**Methyl (Z)-3-(1,3,5-triphenylpent-2-en-4-yn-1-yl)-1H-indole-2-carboxylate (2j)**: 307.7 mg, 68% yield, brown solid, > 20:1 *Z/E*, **R<sub>f</sub>**(PE/DCM = 5:2) = 0.4.

**<sup>1</sup>H NMR** (400 MHz, CDCl<sub>3</sub>) δ 9.15 (s, 1H), 7.81-7.79 (m, 2H), 7.69 (d, *J* = 8.2 Hz, 1H), 7.61-7.59 (m, 2H), 7.48-7.42 (m, 3H), 7.42-7.27 (m, 11H), 7.14-7.10 (m, 1H), 6.86 (d, *J* = 9.8 Hz, 1H), 3.83 (s, 3H).

**<sup>13</sup>C NMR** (100 MHz, CDCl<sub>3</sub>) δ 162.8, 143.0, 138.4, 138.1, 136.5, 131.8, 128.5, 128.44, 128.41, 128.0, 127.8, 127.0, 126.5, 126.3, 125.6, 124.9, 124.2, 123.8, 123.5, 122.7, 120.5, 112.2, 95.8, 86.9, 43.2.

**HRMS** (ESI<sup>+</sup>): calcd. For [C<sub>33</sub>H<sub>25</sub>NO<sub>2</sub>Na]<sup>+</sup> (M + Na)<sup>+</sup>: 490.1783, found: 490.1784.

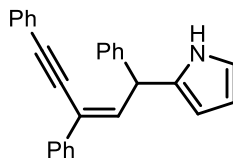

**(Z)-2-(1,3,5-Triphenylpent-2-en-4-yn-1-yl)-1H-pyrrole (2k)**: 133.0 mg, 37% yield, brown solid, > 20:1 *Z/E*, **R<sub>f</sub>**(PE/DCM = 5:2) = 0.5.

**<sup>1</sup>H NMR** (400 MHz, CDCl<sub>3</sub>) δ 8.02 (s, 1H), 7.78-7.76 (m, 2H), 7.63-7.60 (m, 2H), 7.47-7.40 (m, 9H), 7.38-7.31 (m, 2H), 6.87 (d, *J* = 10.0 Hz, 1H), 6.78-6.77 (m, 1H), 6.25 (q, *J* = 3.0 Hz, 1H), 6.10-6.06 (s, 1H), 5.67 (d, *J* = 9.6 Hz, 1H).

**<sup>13</sup>C NMR** (100 MHz, CDCl<sub>3</sub>) δ 141.8, 137.8, 137.7, 133.0, 131.8, 128.9, 128.7, 128.6, 128.5, 128.1, 127.2, 126.4, 123.9, 123.2, 117.5, 108.5, 106.5, 95.9, 86.5, 46.5.

**HRMS** (ESI<sup>+</sup>): calcd. For [C<sub>27</sub>H<sub>21</sub>NNa]<sup>+</sup> (M + Na)<sup>+</sup>: 360.1756, found: 360.1756.

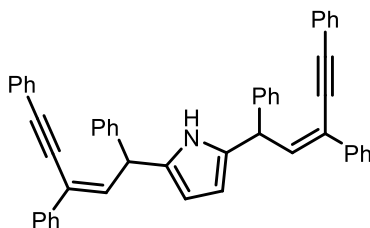

**Bis((Z)-1,3,5-triphenylpent-2-en-4-yn-1-yl)-1H-pyrrole (2l)**: 241.2 mg, 37% yield, blue solid, > 20:1 *Z/E*, **R<sub>f</sub>**(PE/DCM = 5:2) = 0.6.

**<sup>1</sup>H NMR** (400 MHz, CDCl<sub>3</sub>) δ 7.98 (s, 1H), 7.71-7.69 (m, 4H), 7.53-7.51 (m, 4H), 7.45-7.43 (m, 4H), 7.38-7.28 (m, 18H), 6.82 (d, *J* = 10.0 Hz, 2H), 5.98-5.96 (m, 2H), 5.61 (d, *J* = 10.0 Hz, 2H).

**<sup>13</sup>C NMR** (100 MHz, CDCl<sub>3</sub>) δ 141.8, 138.0, 137.8, 132.8, 131.8, 128.8, 128.6, 128.5, 128.4,

128.1, 127.1, 126.5, 123.7, 123.1, 106.6, 95.9, 86.6, 46.6.

**HRMS** (ESI<sup>+</sup>): calcd. For [C<sub>50</sub>H<sub>38</sub>N]<sup>+</sup> (M + H)<sup>+</sup>: 652.3004, found: 652.3004.

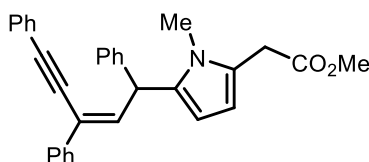

**Methyl (Z)-2-(1-methyl-5-(1,3,5-triphenylpent-2-en-4-yn-1-yl)-1H-pyrrol-2-yl) acetate (2m)**: 320.8 mg, 72% yield, yellow solid, > 20:1 Z/E, **R<sub>f</sub>** (PE/EA = 9:1) = 0.5.

**<sup>1</sup>H NMR** (400 MHz, CDCl<sub>3</sub>) δ 7.69-7.67 (m, 2H), 7.55-7.53 (m, 2H), 7.37-7.27 (m, 10H), 7.23-7.19 (m, 1H), 6.76 (d, *J* = 10.0 Hz, 1H), 6.04-5.96 (m, 2H), 5.59 (d, *J* = 10.0 Hz, 1H), 3.67 (s, 3H), 3.62 (s, 2H), 3.39 (s, 3H).

**<sup>13</sup>C NMR** (100 MHz, CDCl<sub>3</sub>) δ 171.2, 142.3, 137.8, 133.9, 131.7, 128.8, 128.61, 128.57, 128.5, 128.1, 128.0, 126.8, 126.4, 125.2, 123.3, 123.1, 107.6, 106.4, 96.1, 86.7, 52.3, 45.6, 33.0, 31.1.

**HRMS** (ESI<sup>+</sup>): calcd. For [C<sub>31</sub>H<sub>28</sub>NO<sub>2</sub>]<sup>+</sup> (M + H)<sup>+</sup>: 446.2120, found: 446.2123.

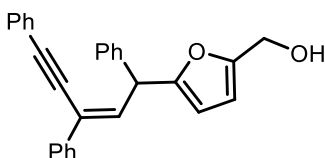

**(Z)-5-(1,3,5-Triphenylpent-2-en-4-yn-1-yl)furan-2-yl) methanol (2n)**: 277.3 mg, 71% yield, brown solid, > 20:1 Z/E, **R<sub>f</sub>** (PE/EA = 17:3) = 0.3.

**<sup>1</sup>H NMR** (400 MHz, CDCl<sub>3</sub>) δ 7.78-7.76 (m, 2H), 7.63-7.61 (m, 2H), 7.44-7.30 (m, 11H), 6.87 (d, *J* = 9.6 Hz, 1H), 6.30 (d, *J* = 3.2 Hz, 1H), 6.20 (d, *J* = 3.0 Hz, 1H), 5.70 (d, *J* = 10.0 Hz, 1H), 4.56 (s, 2H), 2.21 (s, 1H).

**<sup>13</sup>C NMR** (100 MHz, CDCl<sub>3</sub>) δ 155.6, 153.6, 141.3, 137.6, 135.9, 131.7, 128.8, 128.7, 128.5, 128.2, 128.0, 127.0, 126.4, 124.6, 123.1, 108.7, 107.5, 96.3, 86.3, 57.5, 46.9.

**HRMS** (ESI<sup>+</sup>): calcd. For [C<sub>28</sub>H<sub>22</sub>O<sub>2</sub>Na]<sup>+</sup> (M + Na)<sup>+</sup>: 413.1520, found: 413.1517.

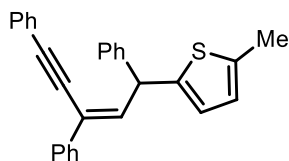

**(Z)-2-Methyl-5-(1,3,5-triphenylpent-2-en-4-yn-1-yl) thiophene (2o)**: 304.6 mg, 78% yield, yellow solid, > 20:1 Z/E, **R<sub>f</sub>** (PE/EA = 19:1) = 0.3.

**<sup>1</sup>H NMR** (400 MHz, CDCl<sub>3</sub>) δ 7.80-7.78 (m, 2H), 7.64-7.62 (m, 2H), 7.50-7.48 (m, 2H), 7.46-7.40 (m, 7H), 7.39-7.31 (m, 2H), 6.91 (d, *J* = 10.0 Hz, 1H), 6.75-6.68 (m, 2H), 5.81 (d, *J* = 10.0 Hz, 1H), 2.51 (s, 3H).

**<sup>13</sup>C NMR** (100 MHz, CDCl<sub>3</sub>) δ 144.8, 143.2, 138.9, 138.5, 137.8, 131.8, 128.8, 128.6, 128.54, 128.52, 128.2, 128.1, 127.1, 126.5, 124.9, 124.8, 123.9, 123.3, 96.1, 86.5, 48.3, 15.5.

**HRMS** (ESI<sup>+</sup>): calcd. For [C<sub>28</sub>H<sub>22</sub>SNa]<sup>+</sup> (M + Na)<sup>+</sup>: 413.1338, found: 413.1340.

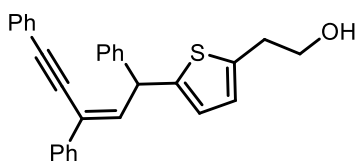

**(Z)-2-(5-(1,3,5-Triphenylpent-2-en-4-yn-1-yl)thiophen-2-yl) ethan-1-ol (2p)**: 201.9 mg, 48% yield, brown solid, > 20:1 *Z/E*, **R<sub>f</sub>**(PE/EA = 17:3) = 0.3.

**<sup>1</sup>H NMR** (400 MHz, CDCl<sub>3</sub>) δ 7.77-7.75 (m, 2H), 7.61-7.58 (m, 2H), 7.46-7.29 (m, 11H), 6.88 (d, *J* = 9.6 Hz, 1H), 6.78-6.75 (m, 2H), 5.78 (d, *J* = 10.0 Hz, 1H), 3.85 (t, *J* = 6.4 Hz, 2H), 3.03 (t, *J* = 6.4 Hz, 2H), 1.78 (s, 1H).

**<sup>13</sup>C NMR** (100 MHz, CDCl<sub>3</sub>) δ 145.9, 143.0, 139.9, 138.2, 137.6, 131.8, 128.8, 128.6, 128.54, 128.52, 128.2, 127.1, 126.5, 125.5, 124.8, 124.0, 123.2, 96.2, 86.3, 63.4, 48.3, 33.7.

**HRMS** (ESI<sup>+</sup>): calcd. For [C<sub>29</sub>H<sub>24</sub>OSNa]<sup>+</sup> (M + Na)<sup>+</sup>: 443.1443, found: 443.1446.

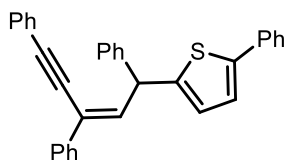

**(Z)-2-Phenyl-5-(1,3,5-triphenylpent-2-en-4-yn-1-yl) thiophene (2q)**: 402.8 mg, 89% yield, light yellow liquid, > 20:1 *Z/E*, **R<sub>f</sub>**(PE/DCM = 5:1) = 0.3.

**<sup>1</sup>H NMR** (400 MHz, CDCl<sub>3</sub>) δ 7.74-7.70 (m, 2H), 7.56-7.53 (m, 4H), 7.44-7.42 (m, 2H), 7.38-7.24 (m, 11H), 7.23-7.19 (m, 1H), 7.16 (d, *J* = 3.6 Hz, 1H), 6.87-6.83 (m, 2H), 5.78 (d, *J* = 10.0 Hz, 1H).

**<sup>13</sup>C NMR** (100 MHz, CDCl<sub>3</sub>) δ 146.9, 143.4, 142.8, 138.1, 137.6, 134.6, 131.8, 128.92, 128.88, 128.7, 128.58, 128.55, 128.3, 127.4, 127.2, 126.5, 126.1, 125.67, 124.30, 123.19, 122.87, 96.31, 86.32, 77.48, 77.16, 76.84, 48.40.

**HRMS** (ESI<sup>+</sup>): calcd. For C<sub>33</sub>H<sub>24</sub>S<sup>+</sup> (M + H)<sup>+</sup>: 453.1677, found: 453.1678.

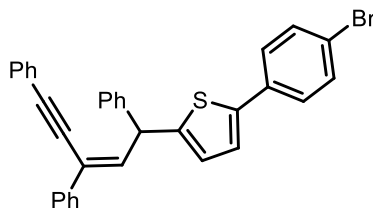

**(Z)-2-(4-Bromophenyl)-5-(1,3,5-triphenylpent-2-en-4-yn-1-yl) thiophene (2r)**: 281.7 mg, 53% yield, white solid, > 20:1 *Z/E*, **R<sub>f</sub>**(PE/DCM = 9:1) = 0.5.

**<sup>1</sup>H NMR** (400 MHz, CDCl<sub>3</sub>) δ 7.78-7.77 (m, 2H), 7.62-7.59 (m, 2H), 7.50-7.31 (m, 15H), 7.20 (d, *J* = 3.6 Hz, 1H), 6.91-6.89 (m, 2H), 5.83 (d, *J* = 10.0 Hz, 1H).

**<sup>13</sup>C NMR** (100 MHz, CDCl<sub>3</sub>) δ 147.6, 142.7, 142.0, 137.8, 137.6, 133.5, 132.0, 131.8, 128.9, 128.7, 128.60, 128.56, 128.3, 128.2, 127.3, 127.1, 126.5, 126.2, 124.5, 123.3, 123.2, 121.1, 96.4, 86.3, 48.4.

**HRMS** (ESI<sup>+</sup>): calcd. For [C<sub>33</sub>H<sub>25</sub>S]<sup>+</sup> (M + H)<sup>+</sup>: 531.0782, found: 531.0770.

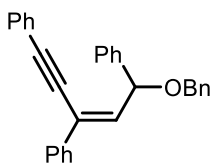

**(Z)-5-(Benzyloxy) pent-3-en-1-yn-1,3,5-triyl tribenzene (3a)**: 332.4 mg, 83% yield, yellow liquid, > 20:1 *Z/E*, **R<sub>f</sub>** (PE/DCM = 7:3) = 0.5.

**<sup>1</sup>H NMR** (400 MHz, CDCl<sub>3</sub>) δ 7.79-7.78 (m, 2H), 7.65-7.63 (m, 2H), 7.54-7.50 (m, 4H), 7.48-7.30 (m, 12H), 6.68 (d, *J* = 9.2 Hz, 1H), 5.88 (d, *J* = 9.2 Hz, 1H), 4.77 (q, *J* = 12.4 Hz, 2H).

**<sup>13</sup>C NMR** (100 MHz, CDCl<sub>3</sub>) δ 141.2, 138.5, 137.2, 137.1, 131.8, 128.72, 128.70, 128.54, 128.51, 128.48, 128.4, 128.0, 127.8, 127.6, 126.7, 126.5, 125.4, 123.0, 96.5, 86.3, 79.4, 70.5.

**HRMS** (ESI<sup>+</sup>): calcd. For [C<sub>30</sub>H<sub>24</sub>ONa]<sup>+</sup> (M + Na)<sup>+</sup>: 423.1725, found: 423.1724.

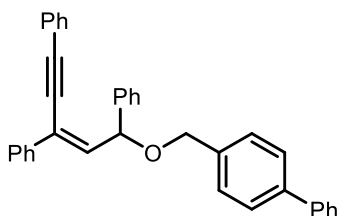

**(Z)-4-(((1,3,5-Triphenylpent-2-en-4-yn-1-yl) oxy) methyl)-1,1'-biphenyl (3b)**: 371.4 mg, 78% yield, brown liquid, > 20:1 *Z/E*, **R<sub>f</sub>** (PE/EA=19:1) = 0.6.

**<sup>1</sup>H NMR** (400 MHz, CDCl<sub>3</sub>) δ 7.81-7.79 (m, 2H), 7.67-7.62 (m, 6H), 7.59-7.57 (m, 2H), 7.52-7.36 (m, 14H), 6.70 (d, *J* = 8.8 Hz, 1H), 5.91 (d, *J* = 9.2 Hz, 1H), 4.87-4.79 (m, 2H).

**<sup>13</sup>C NMR** (100 MHz, CDCl<sub>3</sub>) δ 141.1, 141.0, 140.6, 137.6, 137.1, 131.7, 128.8, 128.73, 128.69, 128.6, 128.5, 128.4, 127.9, 127.3, 127.24, 127.18, 126.7, 126.5, 125.5, 123.0, 96.5, 86.3, 79.2, 70.2.

**HRMS** (ESI<sup>+</sup>): calcd. For [C<sub>36</sub>H<sub>28</sub>ONa]<sup>+</sup> (M + Na)<sup>+</sup>: 499.2038, found: 499.2036.

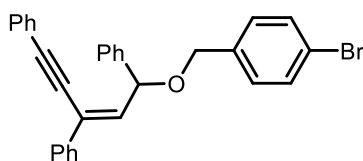

**(Z)-5-(((4-Bromobenzyl)oxy) pent-3-en-1-yn-1,3,5-triyl)tribenzene (3c)**: 350.0 mg, 73% yield, yellow solid, > 20:1 *Z/E*, **R<sub>f</sub>** (PE/EA = 19:1) = 0.6.

**<sup>1</sup>H NMR** (400 MHz, CDCl<sub>3</sub>) δ 7.7-7.72 (m, 2H), 7.56-7.55 (m, 2H), 7.47-7.39 (m, 11H), 7.36-7.31 (m, 4H), 6.59 (d, *J* = 9.2 Hz, 1H), 5.78 (d, *J* = 9.2 Hz, 1H), 4.67 (q, *J* = 12.4 Hz, 2H).

**<sup>13</sup>C NMR** (100 MHz, CDCl<sub>3</sub>) δ 140.9, 137.6, 137.0, 136.7, 131.7, 131.6, 129.7, 128.82, 128.77, 128.62, 128.59, 128.5, 128.0, 126.6, 126.5, 125.7, 122.9, 121.6, 96.6, 86.1, 79.2, 69.6.

**HRMS** (ESI<sup>+</sup>): calcd. For [C<sub>30</sub>H<sub>24</sub>BrO]<sup>+</sup> (M + H)<sup>+</sup>: 479.1011, found: 479.1109.

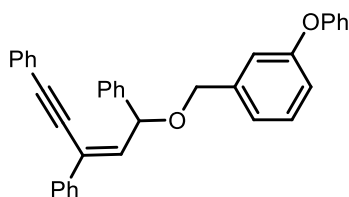

**(Z)-5-((3-Phenoxybenzyl) oxy) pent-3-en-1-yne-1,3,5-triyl tribenzene (3d):** 295.6 mg, 60% yield, orange liquid, > 20:1 *Z/E*,  $R_f$ (PE/EA = 19:1) = 0.6.

$^1\text{H NMR}$  (400 MHz,  $\text{CDCl}_3$ )  $\delta$  7.74-7.72 (m, 2H), 7.58-7.56 (m, 2H), 7.52-7.50 (m, 2H), 7.43-7.30 (m, 12H), 7.21-7.19 (m, 1H), 7.14-7.10 (m, 2H), 7.02-7.01 (m, 2H), 6.96-6.94 (m, 1H), 6.62-6.60 (m, 1H), 5.83 (d,  $J = 9.2$  Hz, 1H), 4.70 (q,  $J = 12.4$  Hz, 2H).

$^{13}\text{C NMR}$  (100 MHz,  $\text{CDCl}_3$ )  $\delta$  157.6, 157.2, 141.0, 140.7, 137.1, 137.0, 131.8, 129.82, 129.78, 128.76, 128.7, 128.6, 128.5, 127.9, 126.7, 126.5, 125.5, 123.4, 123.0, 122.6, 119.2, 118.1, 117.9, 96.6, 86.2, 79.6, 70.1.

**HRMS** (ESI<sup>+</sup>): calcd. For  $[\text{C}_{36}\text{H}_{28}\text{O}_2\text{Na}]^+$  ( $M + \text{Na}$ )<sup>+</sup>: 515.1987, found: 515.1987.

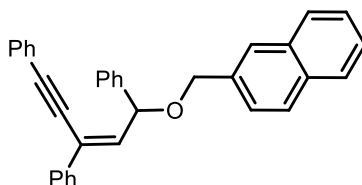

**(Z)-2-(((1,3,5-Triphenylpent-2-en-4-yn-1-yl) oxy) methyl) naphthalene (3e):** 360.5 mg, 80% yield, orange liquid, > 20:1 *Z/E*,  $R_f$ (PE/EA = 19:1) = 0.6.

$^1\text{H NMR}$  (400 MHz,  $\text{CDCl}_3$ )  $\delta$  7.83-7.77 (m, 3H), 7.73-7.68 (m, 3H), 7.56-7.53 (m, 3H), 7.44-7.32 (m, 6H), 7.30-7.16 (m, 7H), 6.61 (d,  $J = 9.2$  Hz, 1H), 5.82 (d,  $J = 9.2$  Hz, 1H), 4.84 (q,  $J = 12.4$  Hz, 2H).

$^{13}\text{C NMR}$  (100 MHz,  $\text{CDCl}_3$ )  $\delta$  141.1, 137.14, 137.05, 135.9, 133.4, 133.1, 131.6, 128.7, 128.59, 128.56, 128.4, 128.3, 128.1, 127.9, 127.8, 126.9, 126.7, 126.5, 126.11, 126.08, 125.9, 125.5, 122.9, 96.5, 86.2, 79.1, 70.5.

**HRMS** (ESI<sup>+</sup>): calcd. For  $[\text{C}_{34}\text{H}_{26}\text{ONa}]^+$  ( $M + \text{Na}$ )<sup>+</sup>: 473.1881, found: 473.1884.

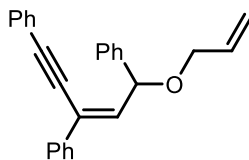

**(Z)-5-(Allyloxy) pent-3-en-1-yne-1,3,5-triyl tribenzene (3f):** 122.7 mg, 35% yield, yellow liquid, > 20:1 *Z/E*,  $R_f$ (PE/EA = 19:1) = 0.6.

$^1\text{H NMR}$  (400 MHz,  $\text{CDCl}_3$ )  $\delta$  7.73-7.71 (m, 2H), 7.61-7.58 (m, 2H), 7.55-7.54 (m, 1H), 7.43-7.29 (m, 9H), 6.56 (d,  $J = 9.2$  Hz, 1H), 6.08-5.99 (m, 1H), 5.77 (d,  $J = 9.2$  Hz, 1H), 5.41-5.36 (m, 1H), 5.25-5.22 (m, 1H), 4.22-4.11 (m, 2H).

$^{13}\text{C NMR}$  (100 MHz,  $\text{CDCl}_3$ )  $\delta$  141.2, 137.3, 137.2, 134.9, 131.7, 128.8, 128.7, 128.62, 128.56, 128.4, 127.8, 126.7, 126.5, 125.2, 123.2, 117.4, 96.5, 92.8, 86.4, 79.6, 69.6.

**HRMS** (ESI<sup>+</sup>): calcd. For [C<sub>26</sub>H<sub>22</sub>ONa]<sup>+</sup> (M + Na)<sup>+</sup>: 373.1568, found: 373.1566.

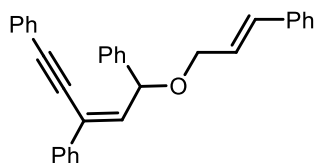

**((Z)-5-(Cinnamyloxy) pent-3-en-1-yne-1,3,5-triyl) tribenzene (3g)**: 260.2 mg, 61% yield, yellow liquid, > 20:1 *Z/E*, **R<sub>f</sub>** (PE/EA = 19:1) = 0.6.

**<sup>1</sup>H NMR** (400 MHz, CDCl<sub>3</sub>) δ 7.71-7.69 (m, 2H), 7.55-7.53 (m, 2H), 7.47-7.45 (m, 2H), 7.39-7.25 (m, 12H), 7.23-7.18 (m, 2H), 6.67-6.61 (m, 1H), 6.56 (d, *J* = 8.8 Hz, 1H), 6.41-6.35 (m, 1H), 5.82 (d, *J* = 8.8 Hz, 1H), 4.44-4.33(m, 2H).

**<sup>13</sup>C NMR** (100 MHz, CDCl<sub>3</sub>) δ 141.2, 137.2, 137.1, 136.8, 133.0, 131.7, 128.8, 128.7, 128.59, 128.55, 128.53, 128.4, 127.9, 127.7, 126.7, 126.5, 126.1, 125.4, 123.0, 96.6, 86.3, 79.2, 69.2.

**HRMS** (ESI<sup>+</sup>): calcd. For [C<sub>32</sub>H<sub>26</sub>ONa]<sup>+</sup> (M + Na)<sup>+</sup>: 449.1881, found: 449.1882.

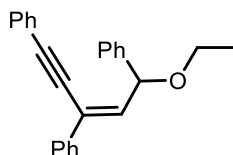

**(Z)-5-Ethoxypent-3-en-1-yne-1,3,5-triyl) tribenzene (3h)**: 264.0 mg, 78% yield, yellow viscous solid, > 20:1 *Z/E*, **R<sub>f</sub>** (PE/EA = 19:1) = 0.6.

**<sup>1</sup>H NMR** (400 MHz, CDCl<sub>3</sub>) δ 7.72-7.70 (m, 2H), 7.61-7.58 (m, 2H), 7.55-7.53 (m, 2H), 7.43-7.35 (m, 7H), 7.33-7.25 (m, 2H), 6.56 (d, *J* = 9.2 Hz, 1H), 5.70 (d, *J* = 9.2 Hz, 1H), 3.76-3.59 (m, 2H), 1.32 (t, *J* = 7.2 Hz, 3H).

**<sup>13</sup>C NMR** (100 MHz, CDCl<sub>3</sub>) δ 141.5, 137.7, 137.3, 131.7, 128.8, 128.7, 128.6, 128.5, 128.3, 127.8, 126.6, 126.5, 124.9, 123.2, 96.4, 86.4, 80.2, 64.3, 15.6.

**HRMS** (ESI<sup>+</sup>): calcd. For [C<sub>25</sub>H<sub>23</sub>O]<sup>+</sup> (M + H)<sup>+</sup>: 339.1749, found: 339.1747.

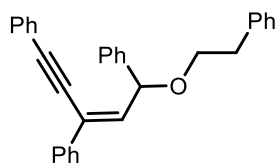

**(Z)-5-Phenethoxypent-3-en-1-yne-1,3,5-triyl) tribenzene (3i)**: 273.4 mg, 66% isolated yield, yellow solid, >20:1 *Z/E*, **R<sub>f</sub>** (PE/EA = 19:1) = 0.6.

**<sup>1</sup>H NMR** (400 MHz, CDCl<sub>3</sub>) δ 7.66-7.64 (m, 2H), 7.55-7.53 (m, 2H), 7.48-7.46 (m, 2H), 7.36-7.31 (m, 7H), 7.29-7.22 (m, 6H), 7.20-7.16 (m, 1H), 6.47 (d, *J* = 8.8 Hz, 1H), 5.71 (d, *J* = 9.2 Hz, 1H), 3.88-3.74 (m, 2H), 2.99 (t, *J* = 7.2 Hz, 2H).

**<sup>13</sup>C NMR** (100 MHz, CDCl<sub>3</sub>) δ 141.3, 139.1, 137.5, 137.1, 131.7, 129.2, 128.8, 128.7, 128.6, 128.5, 128.4, 128.4, 127.8, 126.5, 126.4, 126.3, 125.1, 123.2, 96.5, 86.3, 80.4, 69.8, 36.67.

**HRMS** (ESI<sup>+</sup>): calcd. For [C<sub>31</sub>H<sub>26</sub>ONa]<sup>+</sup> (M + Na)<sup>+</sup>: 437.1881, found: 431.1877.

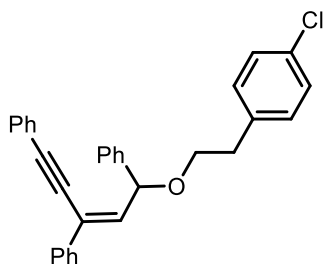

**(Z)-5-(4-Chlorophenoxy) pent-3-en-1-yne-1,3,5-triyl tribenzene (3j):** 211.0 mg, 47% isolated yield, yellow solid, >20:1 Z/E,  $R_f$  (PE/EA = 19:1) = 0.6.

$^1\text{H NMR}$  (400 MHz,  $\text{CDCl}_3$ )  $\delta$  7.65-7.63 (m, 2H), 7.55-7.53 (m, 2H), 7.45-7.43 (m, 2H), 7.38-7.32 (m, 7H), 7.30-7.20 (m, 4H), 7.16-7.14 (m, 2H), 6.42 (d,  $J$  = 8.8 Hz, 1H), 5.67 (d,  $J$  = 8.8 Hz, 1H), 3.85-3.71 (m, 2H), 2.93 (t,  $J$  = 6.8 Hz, 2H).

$^{13}\text{C NMR}$  (100 MHz,  $\text{CDCl}_3$ )  $\delta$  141.2, 137.8, 137.3, 137.1, 132.0, 131.7, 130.5, 128.8, 128.7, 128.63, 128.55, 128.5, 128.4, 127.8, 126.5, 126.4, 125.2, 123.1, 96.5, 86.3, 80.4, 69.5, 36.0.

**HRMS** ( $\text{ESI}^+$ ): calcd. For  $[\text{C}_{31}\text{H}_{25}\text{ClONa}]^+$  ( $M + \text{Na}$ ) $^+$ : 471.1492, found: 471.1495.

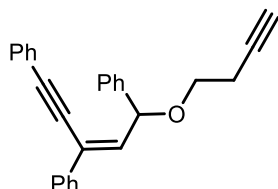

**(Z)-5-(But-3-yn-1-yloxy) pent-3-en-1-yne-1,3,5-triyl tribenzene (3k):** 115.9 mg, 32% isolated yield, yellow solid, >20:1 Z/E,  $R_f$  (PE/EA = 19:1) = 0.6.

$^1\text{H NMR}$  (400 MHz,  $\text{CDCl}_3$ )  $\delta$  7.74-7.71 (m 2H), 7.62-7.60 (m, 2H), 7.56-7.54 (m, 2H), 7.42-7.37 (m, 7H), 7.35-7.29 (m, 2H), 6.56 (d,  $J$  = 8.8 Hz, 1H), 5.75 (d,  $J$  = 9.2 Hz, 1H), 3.83-3.70 (m, 2H), 2.62-2.58 (m, 2H), 2.01 (t,  $J$  = 2.4 Hz, 1H).

$^{13}\text{C NMR}$  (100 MHz,  $\text{CDCl}_3$ )  $\delta$  141.0, 137.1, 137.0, 131.7, 128.8, 128.7, 128.63, 128.55, 128.5, 127.9, 126.6, 126.5, 125.3, 123.1, 96.6, 86.2, 81.5, 80.5, 69.5, 66.9, 20.2.

**HRMS** ( $\text{ESI}^+$ ): calcd. For  $[\text{C}_{27}\text{H}_{22}\text{ONa}]^+$  ( $M + \text{Na}$ ) $^+$ : 385.1568, found: 385.1563.

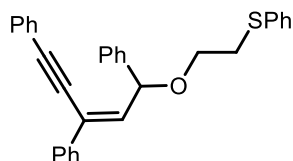

**(Z)-Phenyl (2-((1,3,5-triphenylpent-2-en-4-yn-1-yl) oxy) ethyl) sulfane (3l):** 245.4 mg, 55% isolated yield, orange solid, >20:1 Z/E,  $R_f$  (PE/EA = 20:1) = 0.6.

$^1\text{H NMR}$  (400 MHz,  $\text{CDCl}_3$ )  $\delta$  7.67-7.65 (m, 2H), 7.54-7.52 (m, 2H), 7.49-7.55 (m, 2H), 7.36-7.28 (m, 11H), 7.21-7.17 (m, 2H), 7.13-7.09 (m, 1H), 6.50 (d,  $J$  = 9.2 Hz, 1H), 5.69 (d,  $J$  = 9.2 Hz, 1H), 3.87-3.75 (m, 2H), 3.21 (t,  $J$  = 6.8 Hz, 2H).

$^{13}\text{C NMR}$  (100 MHz,  $\text{CDCl}_3$ )  $\delta$  141.0, 137.1, 137.0, 136.2, 131.7, 129.4, 129.0, 128.8, 128.7, 128.6, 128.5, 128.4, 127.9, 126.6, 126.5, 126.1, 125.4, 123.0, 96.6, 86.2, 80.5, 67.5, 33.6.

**HRMS** (ESI<sup>+</sup>): calcd. For [C<sub>31</sub>H<sub>26</sub>OSNa]<sup>+</sup> (M + Na)<sup>+</sup>: 469.1602, found: 469.1611.

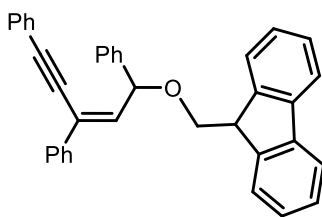

**(Z)-9-(((1,3,5-Triphenylpent-2-en-4-yn-1-yl) oxy) methyl)-9H-fluorene (3m)**: 293.2 mg, 60% isolated yield, yellow solid, >20:1 *Z/E*, **R<sub>f</sub>** (PE/EA = 20:1) = 0.6.

**<sup>1</sup>H NMR** (400 MHz, CDCl<sub>3</sub>) δ 7.80-7.78 (m, 3H), 7.74-7.72 (m, 3H), 7.66-7.64 (m, 2H), 7.56-7.54 (m, 2H), 7.47-7.32 (m, 13H), 6.64 (d, *J* = 8.8 Hz, 1H), 5.89 (d, *J* = 8.8 Hz, 1H), 4.39 (t, *J* = 7.6 Hz, 1H), 3.95 (d, *J* = 7.6 Hz, 2H).

**<sup>13</sup>C NMR** (100 MHz, CDCl<sub>3</sub>) δ 145.2, 144.9, 141.4, 141.3, 141.2, 137.4, 137.2, 131.7, 128.8, 128.7, 128.6, 128.4, 127.8, 127.5, 127.1, 127.0, 126.6, 126.5, 125.6, 125.5, 125.4, 123.0, 119.9, 96.6, 86.3, 80.9, 71.7, 48.3.

**HRMS** (ESI<sup>+</sup>): calcd. For [C<sub>37</sub>H<sub>28</sub>ONa]<sup>+</sup> (M + Na)<sup>+</sup>: 511.2038, found: 511.2037.

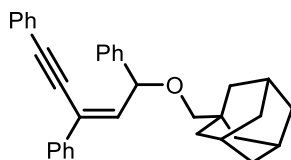

**(1R,3R,5S)-1-(((Z)-1,3,5-Triphenylpent-2-en-4-yn-1-yl) oxy) methyl) adamantane (3n)**: 238.5 mg, 52% isolated yield, colorless viscous solid, >20:1 *Z/E*, **R<sub>f</sub>** (PE/EA = 20:1) = 0.4.

**<sup>1</sup>H NMR** (400 MHz, CDCl<sub>3</sub>) δ 7.75-7.73 (m, 2H), 7.63-7.61 (m, 2H), 7.58-7.56 (m, 2H), 7.43-7.38 (m, 7H), 7.35-7.29 (m, 2H), 6.52 (d, *J* = 9.2 Hz, 1H), 5.65 (d, *J* = 8.8 Hz, 1H), 3.27-3.16 (m, 2H), 2.05-1.99 (m, 3H), 1.78-1.67 (m, 12H).

**<sup>13</sup>C NMR** (100 MHz, CDCl<sub>3</sub>) δ 141.9, 138.5, 137.3, 131.7, 128.7, 128.6, 128.5, 128.3, 127.5, 126.4, 124.6, 123.3, 96.2, 86.6, 80.4, 79.7, 40.0, 37.4, 34.4, 28.5.

**HRMS** (ESI<sup>+</sup>): calcd. For [C<sub>34</sub>H<sub>35</sub>O]<sup>+</sup> (M + H)<sup>+</sup>: 459.2688, found: 459.2685.

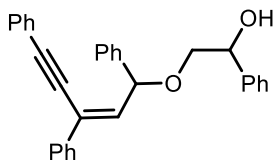

**(Z)-1-Phenyl-2-(((1,3,5-triphenylpent-2-en-4-yn-1-yl) oxy) ethan-1-ol (3o)**: 176.5 mg, 41% isolated yield, yellow liquid, *dr* = 1:1, >20:1 *Z/E*, **R<sub>f</sub>** (PE/EA = 10:1) = 0.3.

**<sup>1</sup>H NMR** (400 MHz, CDCl<sub>3</sub>) δ 7.74-7.42 (m, 5H), 7.62-7.54 (m, 11H), 7.41-7.30 (m, 34H), 6.59-6.57 (m, 2H), 5.83-5.79 (m, 2H), 5.07-5.04 (m, 2H), 3.88-3.76 (m, 2H), 3.72-3.63 (m, 2H), 3.04 (s, 2H).

**<sup>13</sup>C NMR** (100 MHz, CDCl<sub>3</sub>) δ 140.79, 140.76, 140.2, 137.0, 136.6, 136.5, 131.8, 131.7, 128.9, 128.8, 128.6, 128.6, 128.52, 128.46, 128.1, 128.0, 127.9, 126.6, 126.6, 126.5, 126.4,

126.1, 125.8, 125.5, 122.9, 96.9, 96.8, 86.2, 86.1, 81.1, 80.8, 74.6, 74.4, 73.2, 72.9.

**HRMS** (ESI<sup>+</sup>): calcd. For [C<sub>31</sub>H<sub>26</sub>O<sub>2</sub>Na]<sup>+</sup> (M + Na)<sup>+</sup>: 453.1830, found: 453.1823.

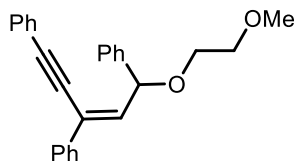

**(Z)-5-(2-Methoxyethoxy) pent-3-en-1-yn-1,3,5-triyl tribenzene (3p)**: 125.3 mg, 34% isolated yield, yellow liquid, >20:1 *Z/E*, **R<sub>f</sub>** (PE/EA = 20:1) = 0.6.

**<sup>1</sup>H NMR** (400 MHz, CDCl<sub>3</sub>) δ 7.74-7.72 (m, 2H), 7.63-7.60 (m, 2H), 7.58-7.56 (m, 2H), 7.44-7.31 (m, 7H), 7.34-7.29 (m, 2H), 6.63-6.60 (m, 1H), 5.77 (d, *J* = 8.8 Hz, 1H), 3.86-3.73 (m, 2H), 3.68-3.66 (m, 2H), 3.45-3.42 (m, 3H).

**<sup>13</sup>C NMR** (100 MHz, CDCl<sub>3</sub>) δ 141.1, 137.3, 137.2, 131.7, 128.8, 128.7, 128.6, 128.5, 128.3, 127.8, 126.7, 126.4, 125.0, 123.1, 96.5, 86.3, 80.8, 72.1, 68.1, 59.2.

**HRMS** (ESI<sup>+</sup>): calcd. For [C<sub>26</sub>H<sub>24</sub>O<sub>2</sub>Na]<sup>+</sup> (M + Na)<sup>+</sup>: 391.1674, found: 391.1677.

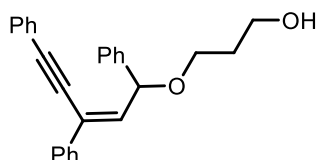

**(Z)-3-((1,3,5-Triphenylpent-2-en-4-yn-1-yl)oxy) propan-1-ol (3q)**: 165.8 mg, 45% isolated yield, light yellow liquid, >20:1 *Z/E*, **R<sub>f</sub>** (PE/EA = 5:1) = 0.2.

**<sup>1</sup>H NMR** (400 MHz, CDCl<sub>3</sub>) δ 7.76-7.74 (m, 2H), 7.65-7.63 (m, 2H), 7.57-7.55 (m, 2H), 7.47-7.39 (m, 7H), 7.37-7.32 (m, 2H), 6.57 (d, *J* = 8.8 Hz, 1H), 5.74 (d, *J* = 8.8 Hz, 1H), 3.91-3.85 (m, 3H), 3.80-3.75 (m, 1H), 2.52 (s, 1H), 2.00-1.94 (m, 2H).

**<sup>13</sup>C NMR** (100 MHz, CDCl<sub>3</sub>) δ 141.0, 137.1, 137.0, 131.7, 128.8, 128.7, 128.6, 128.5, 128.4, 127.9, 126.5, 126.4, 125.4, 123.0, 96.6, 86.2, 80.8, 67.8, 61.8, 32.4.

**HRMS** (ESI<sup>+</sup>): calcd. For [C<sub>26</sub>H<sub>24</sub>O<sub>2</sub>Na]<sup>+</sup> (M + Na)<sup>+</sup>: 391.1674, found: 391.1673.

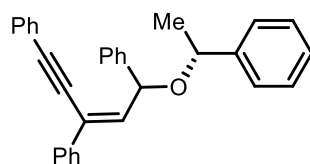

**((Z)-5-((R)-1-Phenylethoxy) pent-3-en-1-yn-1,3,5-triyl) tribenzene (3r)**: 221.4 mg, 51% isolated yield, yellow liquid, *dr* = 1:1, >20:1 *Z/E*, **R<sub>f</sub>** (PE/EA = 20:1) = 0.6.

**<sup>1</sup>H NMR** (400 MHz, CDCl<sub>3</sub>) δ 7.75-7.73 (m, 2H), 7.59-7.57 (m, 2H), 7.48-7.46 (m, 4H), 7.40-7.16 (m, 32H), 6.54 (d, *J* = 9.2 Hz, 1H), 6.52 (d, *J* = 9.2 Hz, 1H), 5.67 (d, *J* = 9.2 Hz, 1H), 5.62 (d, *J* = 9.2 Hz, 1H), 4.78 (q, *J* = 6.4 Hz, 1H), 4.55 (q, *J* = 6.4 Hz, 1H), 1.53 (d, *J* = 6.4 Hz, 3H), 1.50 (d, *J* = 6.4 Hz, 3H).

**<sup>13</sup>C NMR** (100 MHz, CDCl<sub>3</sub>) δ 144.1, 144.0, 141.44, 141.43, 137.44, 137.41, 137.20, 137.18, 131.8, 131.7, 128.8, 128.62, 128.59, 128.54, 128.53, 128.46, 128.40, 128.37, 128.3, 128.2,

127.9, 127.53, 127.49, 127.4, 126.9, 126.8, 126.54, 126.48, 126.47, 126.46, 126.0, 123.8, 123.1, 122.9, 96.2, 96.1, 86.3, 86.1, 78.1, 76.7, 75.2, 75.1, 24.6, 24.4.

**HRMS** (ESI<sup>+</sup>): calcd. For [C<sub>31</sub>H<sub>26</sub>ONa]<sup>+</sup> (M + Na)<sup>+</sup>: 437.1881, found: 437.1881.

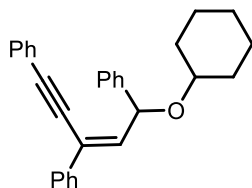

**(Z)-5-(Cyclohexyloxy) pent-3-en-1-yn-1,3,5-triyl tribenzene (3s)**: 78.5 mg, 20% isolated yield, yellow viscous solid, >20:1 Z/E, **R<sub>f</sub>** (PE/EA = 20:1) = 0.6.

**<sup>1</sup>H NMR** (400 MHz, CDCl<sub>3</sub>) δ 7.71-7.69 (m, 2H), 7.57-7.54 (m, 2H), 7.53-7.51 (m, 2H), 7.39-7.33 (m, 7H), 7.30-7.23 (m, 2H), 6.55 (d, *J* = 9.2 Hz, 1H), 5.86 (d, *J* = 9.2 Hz, 1H), 3.56-3.49 (m, 1H), 2.02-2.00 (m, 2H), 1.77-1.72 (m, 2H), 1.57-1.41 (m, 3H), 1.29-1.20 (m, 3H).

**<sup>13</sup>C NMR** (100 MHz, CDCl<sub>3</sub>) δ 142.1, 138.3, 137.3, 131.7, 128.7, 128.62, 128.59, 128.5, 128.3, 127.6, 126.6, 126.5, 124.4, 123.3, 96.0, 86.5, 75.1, 33.1, 32.5, 26.0, 24.4.

**HRMS** (ESI<sup>+</sup>): calcd. For [C<sub>29</sub>H<sub>29</sub>O]<sup>+</sup> (M + H)<sup>+</sup>: 393.2218, found: 393.2218.

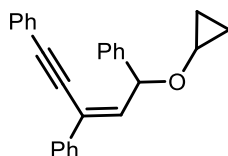

**(Z)-5-(Cyclopropoxy)pent-3-en-1-yn-1,3,5-triyl tribenzene (3t)**: 73.6 mg, 21% isolated yield, yellow viscous solid, >20:1 Z/E, **R<sub>f</sub>** (PE/EA = 20:1) = 0.6.

**<sup>1</sup>H NMR** (400 MHz, CDCl<sub>3</sub>) δ 7.75-7.73 (m, 2H), 7.64-7.61 (m, 2H), 7.55-7.54 (m, 2H), 7.46-7.38 (m, 7H), 7.35-7.30 (m, 2H), 6.60 (d, *J* = 9.2 Hz, 1H), 5.84 (d, *J* = 9.2 Hz, 1H), 3.53-3.49 (m, 1H), 0.85-0.74 (m, 2H), 0.62-0.53 (m, 2H).

**<sup>13</sup>C NMR** (100 MHz, CDCl<sub>3</sub>) δ 141.2, 137.2, 137.1, 131.7, 128.8, 128.7, 128.63, 128.55, 128.4, 127.8, 126.7, 126.5, 125.1, 123.2, 96.4, 86.3, 80.8, 52.1, 6.5, 6.1.

**HRMS** (ESI<sup>+</sup>): calcd. For [C<sub>26</sub>H<sub>22</sub>ONa]<sup>+</sup> (M + Na)<sup>+</sup>: 373.1568, found: 373.1571.

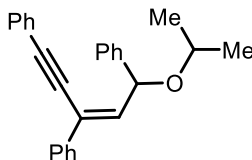

**(Z)-5-(Isopropoxy)pent-3-en-1-yn-1,3,5-triyl tribenzene (3u)**: 95.2 mg, 27% isolated yield, yellow liquid, >20:1 Z/E, **R<sub>f</sub>** (PE/EA = 20:1) = 0.6.

**<sup>1</sup>H NMR** (400 MHz, CDCl<sub>3</sub>) δ 7.73-7.71 (m, 2H), 7.61-7.58 (m, 2H), 7.55-7.54 (m, 2H), 7.43-7.36 (m, 7H), 7.33-7.27 (m, 2H), 6.54 (d, *J* = 9.2 Hz, 1H), 5.85 (d, *J* = 9.2 Hz, 1H), 3.92-3.83 (m, 1H), 1.30 (t, *J* = 5.6 Hz, 6H).

**<sup>13</sup>C NMR** (100 MHz, CDCl<sub>3</sub>) δ 142.0, 138.2, 137.3, 131.7, 128.7, 128.6, 128.5, 128.3, 127.6,

126.6, 126.5, 124.5, 123.3, 96.1, 86.5, 77.4, 69.2, 22.9, 22.5.

**HRMS** (ESI<sup>+</sup>): calcd. For [C<sub>26</sub>H<sub>24</sub>ONa]<sup>+</sup> (M + Na)<sup>+</sup>: 375.1725, found: 375.1724.

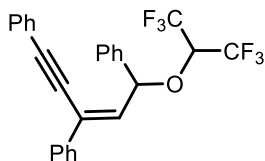

**(Z)-5-((1,1,1,3,3,3-Hexafluoropropan-2-yl)oxy)pent-3-en-1-yn-1,3,5-triyl tribenzene (3v)**: 73.7 mg, 16% isolated yield, light yellow liquid, >20:1 *Z/E*, **R<sub>f</sub>**(PE/EA = 20:1) = 0.6.

**<sup>1</sup>H NMR** (400 MHz, CDCl<sub>3</sub>) δ 7.75-7.73 (m, 2H), 7.59-7.57 (m, 2H), 7.53-7.51 (m, 2H), 7.44-7.36 (m, 9H), 6.52 (d, *J* = 9.6 Hz, 1H), 6.18 (d, *J* = 9.6 Hz, 1H), 4.50 (septet, *J* = 6.0 Hz, 1H).

**<sup>13</sup>C NMR** (100 MHz, CDCl<sub>3</sub>) 138.3, 136.5, 132.5, 131.8, 129.3, 129.2, 128.99, 128.96, 128.82, 128.79, 128.75, 126.8, 126.7, 122.4, 97.6, 85.1, 82.9, 73.3, 73.0, 72.6, 72.3, 72.0.

**HRMS** (ESI<sup>+</sup>): calcd. For [C<sub>26</sub>H<sub>19</sub>F<sub>6</sub>O]<sup>+</sup> (M + H)<sup>+</sup>: 461.1340, found: 461.1343.

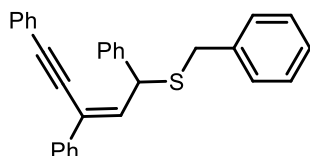

**(Z)-Benzyl (1,3,5-triphenylpent-2-en-4-yn-1-yl) sulfane (4a)**: 304.1 mg, 73% isolated yield, light yellow liquid, >20:1 *Z/E*, **R<sub>f</sub>**(PE/EA = 20:1) = 0.6.

**<sup>1</sup>H NMR** (400 MHz, CDCl<sub>3</sub>) δ 7.69-7.66 (m, 2H), 7.46-7.44 (m, 2H), 7.42-7.39 (m, 2H), 7.37-7.26 (m, 10H), 7.25-7.23 (m, 1H), 7.20-7.13 (m, 3H), 6.64 (d, *J* = 10.4 Hz, 1H), 5.33 (d, *J* = 10.4 Hz, 1H), 3.84-3.71 (m, 2H).

**<sup>13</sup>C NMR** (100 MHz, CDCl<sub>3</sub>) δ 139.9, 138.4, 137.3, 136.7, 131.8, 129.1, 128.9, 128.7, 128.6, 128.54, 128.46, 128.3, 128.0, 127.6, 126.9, 126.5, 124.1, 123.1, 96.8, 86.2, 49.9, 36.3.

**HRMS** (ESI<sup>+</sup>): calcd. For [C<sub>30</sub>H<sub>25</sub>S]<sup>+</sup> (M + H)<sup>+</sup>: 417.1677, found: 417.1677.

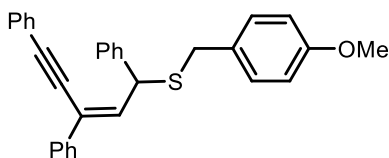

**(Z)-(4-Methoxybenzyl) (1,3,5-triphenylpent-2-en-4-yn-1-yl) sulfane (4b)**: 330.5 mg, 74% isolated yield, white solid, >20:1 *Z/E*, **R<sub>f</sub>**(PE/EA = 20:1) = 0.6.

**<sup>1</sup>H NMR** (400 MHz, CDCl<sub>3</sub>) δ 7.79-7.76 (m, 2H), 7.55-7.53 (m, 2H), 7.51-7.49 (m, 2H), 7.47-7.31 (m, 11H), 6.81-6.79 (m, 2H), 6.74 (d, *J* = 10.4 Hz, 1H), 5.40 (d, *J* = 10.4 Hz, 1H), 3.89-3.76 (m, 2H), 3.73 (s, 3H).

**<sup>13</sup>C NMR** (100 MHz, CDCl<sub>3</sub>) δ 158.6, 140.0, 137.3, 136.8, 131.8, 130.3, 130.2, 128.9, 128.6, 128.54, 128.45, 128.3, 128.0, 127.6, 126.4, 123.9, 123.1, 113.9, 96.7, 86.3, 55.2, 49.6, 35.6.

**HRMS** (ESI<sup>+</sup>): calcd. For [C<sub>31</sub>H<sub>26</sub>OSNa]<sup>+</sup> (M + Na)<sup>+</sup>: 469.1602, found: 469.1599.

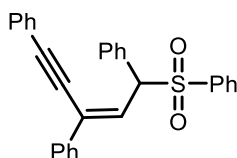

**(Z)-3-(5-(Phenylsulfonyl) pent-3-en-1-yn-1,3,5-triyl) tribenzene (4c):** 195.5 mg, 45% isolated yield, white solid, >20:1 Z/E,  $R_f$ (PE/EA = 20:1) = 0.3.

$^1\text{H NMR}$  (400 MHz,  $\text{CDCl}_3$ )  $\delta$  7.87-7.85 (m, 2H), 7.61-7.59 (m, 2H), 7.57-7.54 (m, 3H), 7.45-7.39 (m, 10H), 7.37-7.33 (m, 2H), 6.82 (d,  $J$  = 10.4 Hz, 1H), 5.64 (d,  $J$  = 10.8 Hz, 1H).

$^{13}\text{C NMR}$  (100 MHz,  $\text{CDCl}_3$ )  $\delta$  138.0, 136.9, 133.8, 131.70, 131.65, 130.3, 130.1, 129.3, 129.2, 129.1, 128.99, 128.95, 128.8, 128.7, 128.6, 126.62, 126.57, 122.4, 97.4, 85.0, 73.3.

**HRMS** ( $\text{ESI}^+$ ): calcd. For  $[\text{C}_{29}\text{H}_{22}\text{O}_2\text{SNa}]^+$  ( $\text{M} + \text{Na}$ ) $^+$ : 457.1238, found: 457.1233.

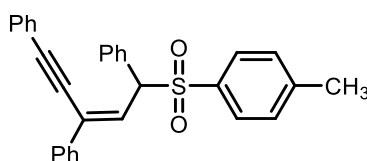

**(Z)-3-(5-(Tosyl)pent-3-en-1-yn-1,3,5-triyl) tribenzene (4d):** 197.4 mg, 44% isolated yield, white solid, >20:1 Z/E,  $R_f$ (PE/EA = 20:1) = 0.3.

$^1\text{H NMR}$  (400 MHz,  $\text{CDCl}_3$ )  $\delta$  7.72-7.70 (m, 2H), 7.62-7.60 (m, 2H), 7.54-7.52 (m, 2H), 7.44-7.35 (m, 11H), 7.19 (d,  $J$  = 8.0 Hz, 2H), 6.81 (d,  $J$  = 10.8 Hz, 1H), 5.60 (d,  $J$  = 10.8 Hz, 1H), 2.35 (s, 3H).

$^{13}\text{C NMR}$  (100 MHz,  $\text{CDCl}_3$ )  $\delta$  144.7, 137.0, 135.1, 132.0, 131.7, 130.07, 130.05, 129.5, 129.3, 129.1, 129.04, 128.96, 128.9, 128.7, 128.6, 127.0, 126.6, 122.6, 97.3, 85.1, 73.3, 21.7.

**HRMS** ( $\text{ESI}^+$ ): calcd. For  $[\text{C}_{30}\text{H}_{25}\text{O}_2\text{S}]^+$  ( $\text{M} + \text{H}$ ) $^+$ : 449.1575, found: 449.1572.

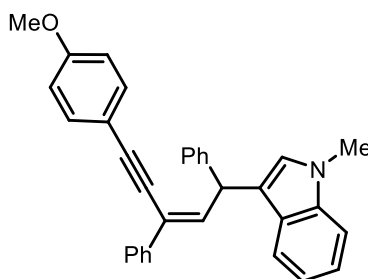

**(Z)-3-(5-(4-Methoxyphenyl)-1,3-diphenylpent-2-en-4-yn-1-yl)-1-methyl-1H-indole (5b):** 226.8 mg, 50% isolated yield, white solid, >20:1 Z/E,  $R_f$ (PE/DCM = 5:2) = 0.6.

$^1\text{H NMR}$  (400 MHz,  $\text{CDCl}_3$ )  $\delta$  7.71-7.69 (m, 2H), 7.52-7.50 (m, 1H), 7.47-7.42 (m, 4H), 7.34-7.27 (m, 4H), 7.26-7.17 (m, 4H), 7.03-6.99 (m, 1H), 6.88-6.84 (m, 3H), 6.80-6.77 (m, 1H), 5.83 (d,  $J$  = 10.0 Hz, 1H), 3.77 (s, 3H), 3.68 (s, 3H).

$^{13}\text{C NMR}$  (100 MHz,  $\text{CDCl}_3$ )  $\delta$  159.8, 143.5, 139.1, 138.2, 137.5, 133.2, 128.6, 128.5, 128.3, 127.8, 127.4, 127.0, 126.5, 126.4, 123.2, 121.8, 120.2, 119.0, 116.9, 115.6, 114.1, 109.3, 85.6, 55.4, 44.7, 32.8.

**HRMS** ( $\text{ESI}^+$ ): calcd. For  $[\text{C}_{33}\text{H}_{27}\text{NONa}]^+$  ( $\text{M} + \text{Na}$ ) $^+$ : 476.1990, found: 476.1995.

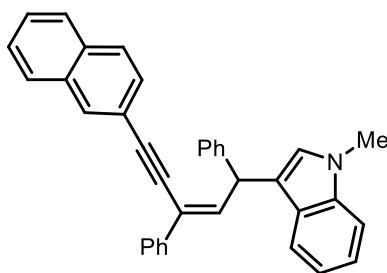

**(Z)-1-Methyl-3-(5-(naphthalen-2-yl)-1,3-diphenylpent-2-en-4-yn-1-yl)-1H-indole (5c):**

293.6 mg, 62% isolated yield, white solid, >20:1 *Z/E*,  $R_f$  (PE/DCM = 5:2) = 0.6.

$^1\text{H NMR}$  (400 MHz,  $\text{CDCl}_3$ )  $\delta$  8.01 (s, 1H), 7.77-7.73 (m, 5H), 7.56-7.54 (m, 2H), 7.47-7.43 (m, 4H), 7.36-7.14 (m, 8H), 7.05-7.01 (m, 1H), 6.95-6.93 (m, 1H), 6.80 (s, 1H), 5.90 (d,  $J$  = 10.0 Hz, 1H), 3.67 (s, 3H).

$^{13}\text{C NMR}$  (100 MHz,  $\text{CDCl}_3$ )  $\delta$  143.4, 140.0, 138.1, 137.6, 133.1, 133.0, 131.6, 128.7, 128.5, 128.4, 128.2, 127.90, 127.88, 127.4, 127.1, 126.8, 126.7, 126.6, 126.5, 123.2, 121.8, 120.8, 120.2, 119.1, 116.9, 109.4, 96.4, 87.3, 44.9, 32.8.

**HRMS** ( $\text{ESI}^+$ ): calcd. For  $[\text{C}_{36}\text{H}_{28}\text{N}]^+$  ( $\text{M} + \text{H}$ ) $^+$ : 474.2222, found: 474.2217.

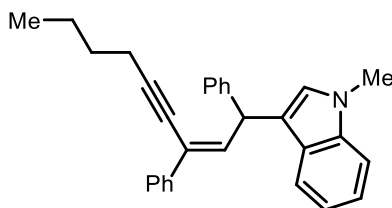

**(Z)-3-(1,3-Diphenylnon-2-en-4-yn-1-yl)-1-methyl-1H-indole (5d):** 391.5 mg, 97% isolated yield, white solid, >20:1 *Z/E*,  $R_f$  (PE/DCM = 5:2) = 0.5.

$^1\text{H NMR}$  (400 MHz,  $\text{CDCl}_3$ )  $\delta$  7.64-7.61 (m, 2H), 7.47-7.45 (m, 1H), 7.39-7.37 (m, 2H), 7.31-7.27 (m, 5H), 7.24-7.17 (m, 3H), 7.03-6.99 (m, 1H), 6.77-6.75 (m, 2H), 5.72 (d,  $J$  = 10.0 Hz, 1H), 3.72 (s, 3H), 2.49 (t,  $J$  = 6.8 Hz, 2H), 1.64-1.58 (m, 2H), 1.52-1.47 (m, 2H), 0.93 (t,  $J$  = 7.6 Hz, 3H).

$^{13}\text{C NMR}$  (100 MHz,  $\text{CDCl}_3$ )  $\delta$  143.7, 138.7, 138.3, 137.5, 128.6, 128.32, 128.30, 127.6, 127.5, 127.0, 126.4, 123.4, 121.7, 120.3, 119.0, 117.1, 109.3, 100.1, 97.1, 77.9, 44.5, 32.8, 31.1, 22.2, 19.5, 13.8.

**HRMS** ( $\text{ESI}^+$ ): calcd. For  $[\text{C}_{30}\text{H}_{29}\text{NNa}]^+$  ( $\text{M} + \text{Na}$ ) $^+$ : 426.2198, found: 426.2198.

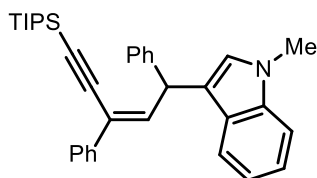

**(Z)-3-(1,3-Diphenyl-5-(triisopropylsilyl)pent-2-en-4-yn-1-yl)-1-methyl-1H-indole (5e):**

488.7 mg, 97% isolated yield, white solid, >20:1 *Z/E*,  $R_f$  (PE/DCM = 5:2) = 0.4.

**<sup>1</sup>H NMR** (400 MHz, CDCl<sub>3</sub>) δ 7.69-7.66 (m, 2H), 7.55-7.53 (m, 1H), 7.43-7.40 (m, 2H), 7.35-7.30 (m, 4H), 7.29-7.0 (m, 4H), 7.05-7.01 (m, 1H), 6.90 (d, *J* = 10.0 Hz, 1H), 6.77 (s, 1H), 5.85 (d, *J* = 10.4 Hz, 1H), 3.74 (s, 3H), 1.17-1.14 (m, 21H).

**<sup>13</sup>C NMR** (100 MHz, CDCl<sub>3</sub>) δ 143.3, 140.4, 137.9, 137.5, 128.6, 128.4, 128.3, 127.8, 127.4, 126.9, 126.5, 126.4, 123.2, 121.8, 120.2, 119.0, 116.9, 109.2, 104.1, 97.8, 44.8, 32.7, 18.9, 11.6.

**HRMS** (ESI<sup>+</sup>): calcd. For [C<sub>35</sub>H<sub>42</sub>NSi]<sup>+</sup> (*M* + *H*)<sup>+</sup>: 504.3087, found: 504.3078.

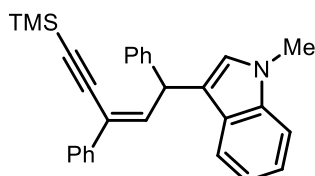

**(Z)-3-(1,3-Diphenyl-5-(trimethylsilyl)pent-2-en-4-yn-1-yl)-1-methyl-1H-indole (5f)**: 352.5 mg, 84% isolated yield, white solid, >20:1 *Z/E*, *R<sub>f</sub>* (PE/DCM = 5:2) = 0.4.

**<sup>1</sup>H NMR** (400 MHz, CDCl<sub>3</sub>) δ 7.86-7.84 (m, 2H), 7.78-7.76 (m, 1H), 7.64-7.63 (m, 2H), 7.55-7.40 (m, 8H), 7.28-7.24 (m, 1H), 7.12 (d, *J* = 10.0 Hz, 1H), 6.95 (s, 1H), 6.02 (d, *J* = 10.0 Hz, 1H), 3.85 (s, 3H), 0.52 (s, 9H).

**<sup>13</sup>C NMR** (100 MHz, CDCl<sub>3</sub>) δ 143.4, 140.7, 137.7, 137.5, 128.6, 128.4, 128.3, 127.8, 127.4, 126.9, 126.6, 126.4, 123.0, 121.8, 120.1, 119.1, 116.9, 109.3, 102.5, 101.4, 44.6, 32.7, 0.2.

**HRMS** (ESI<sup>+</sup>): calcd. For [C<sub>29</sub>H<sub>30</sub>NSi]<sup>+</sup> (*M* + *H*)<sup>+</sup>: 420.2148, found: 420.2146.

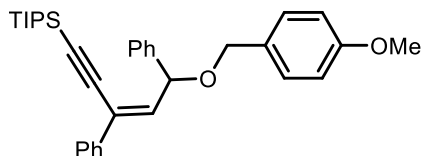

**(Z)-Triisopropyl(5-((4-methoxybenzyl)oxy)-3,5-diphenylpent-3-en-1-yn-1-yl)silane (5g)**: 408.6 mg, 80% isolated yield, pale yellow liquid, >20:1 *Z/E*, *R<sub>f</sub>* (PE/DCM = 5:2) = 0.4.

**<sup>1</sup>H NMR** (400 MHz, CDCl<sub>3</sub>) δ 7.65-7.63 (m, 2H), 7.54-7.52 (m, 2H), 7.35-7.22 (m, 8H), 6.86-6.84 (m, 2H), 6.55 (d, *J* = 9.2 Hz, 1H), 5.79 (d, *J* = 9.2 Hz, 1H), 4.62-4.55 (m, 2H), 3.74 (s, 3H), 1.21-1.06 (s, 21H).

**<sup>13</sup>C NMR** (100 MHz, CDCl<sub>3</sub>) δ 159.2, 141.3, 138.1, 137.0, 130.7, 129.3, 128.6, 128.4, 128.3, 127.8, 126.6, 126.4, 125.1, 113.9, 103.5, 98.7, 79.7, 70.4, 55.3, 18.9, 11.5.

**HRMS** (ESI<sup>+</sup>): calcd. For [C<sub>34</sub>H<sub>42</sub>O<sub>2</sub>SiNa]<sup>+</sup> (*M* + *Na*)<sup>+</sup>: 533.2852, found: 533.2854.

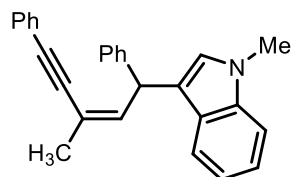

**(Z)-1-Methyl-3-(3-methyl-1,5-diphenylpent-2-en-4-yn-1-yl)-1H-indole (5h)**: 122.9 mg, 34% isolated yield, pale yellow liquid, *Z/E* = 3.6:1, *R<sub>f</sub>* (PE/DCM = 5:2) = 0.65.

**<sup>1</sup>H NMR** (400 MHz, CDCl<sub>3</sub>) δ 7.48-7.45 (m, 3.2H), 7.42-7.36 (m, 3.1H), 7.32-7.25 (m, 8.9H), 7.22-7.17 (m, 2.9H), 7.03-6.98 (m, 1.3H), 6.81 (s, 0.28H), 6.75 (s, 1H), 6.45-6.42 (m, 0.28H), 6.22-6.20 (m, 1H), 5.59 (d, *J* = 10.0 Hz, 1H), 5.20 (d, *J* = 10.0 Hz, 0.28H), 3.70-3.69 (s, 4H), 2.04 (d, *J* = 1.6 Hz, 0.84H), 2.00 (d, *J* = 1.6 Hz, 3H).

**<sup>13</sup>C NMR** (100 MHz, CDCl<sub>3</sub>) δ 143.9, 143.7, 140.4, 139.8, 137.5, 131.7, 131.6, 128.63, 128.55, 128.43, 128.36, 128.2, 128.0, 127.3, 127.1, 126.9, 126.5, 126.4, 123.7, 121.8, 121.748, 120.2, 119.9, 118.98, 118.95, 117.8, 117.2, 116.7, 109.4, 109.3, 93.6, 92.6, 88.9, 86.9, 44.4, 42.2, 32.8, 23.3, 17.8.

**RMS (ESI<sup>+</sup>):** calcd. For [C<sub>27</sub>H<sub>23</sub>NNa]<sup>+</sup> (M + Na)<sup>+</sup>: 384.1728, found: 384.1726.

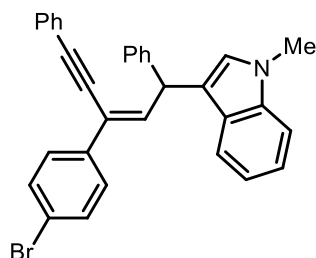

**(Z)-3-(3-(4-Bromophenyl)-1,5-diphenylpent-2-en-4-yn-1-yl)-1-methyl-1H-indole (5i):**

452.2 mg, 90% isolated yield, white solid, >20:1 *Z/E*, **R<sub>f</sub>** (PE/DCM = 5:2) = 0.5.

**<sup>1</sup>H NMR** (400 MHz, CDCl<sub>3</sub>) δ 7.60-7.51 (m, 5H), 7.49-7.44 (m, 4H), 7.38-7.31 (m, 6H), 7.29-7.22 (m, 2H), 7.07-7.04 (m, 1H), 6.92 (d, *J* = 10.0 Hz, 1H), 6.82 (s, 1H), 5.83 (d, *J* = 10.0 Hz, 1H), 3.76 (s, 3H).

**<sup>13</sup>C NMR** (100 MHz, CDCl<sub>3</sub>) δ 143.1, 140.2, 137.6, 137.1, 131.8, 131.6, 128.72, 128.66, 128.6, 128.3, 128.1, 127.4, 127.1, 126.7, 123.3, 122.1, 121.90, 121.85, 120.1, 119.2, 116.7, 109.4, 96.4, 86.3, 44.9, 32.9.

**HRMS (ESI<sup>+</sup>):** calcd. For [C<sub>32</sub>H<sub>25</sub>BrN]<sup>+</sup> (M + H)<sup>+</sup>: 502.1170, found: 502.1163.

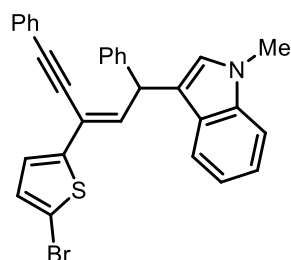

**(E)-3-(3-(5-Bromothiophen-2-yl)-1,5-diphenylpent-2-en-4-yn-1-yl)-1-methyl-1H-indole**

**(5j):** 508.5 mg, 30% isolated yield, yellow liquid, >20:1 *Z/E*, **R<sub>f</sub>** (PE/DCM = 5:2) = 0.6.

**<sup>1</sup>H NMR** (400 MHz, CDCl<sub>3</sub>) δ 7.58-7.56 (m, 2H), 7.51-7.49 (m, 1H), 7.44-7.42 (m, 2H), 7.40-7.32 (m, 6H), 7.30-7.23 (m, 2H), 7.12-7.10 (m, 1H), 7.09-7.05 (m, 1H), 6.98-6.97 (m, 1H), 6.83 (s, 1H), 6.75 (d, *J* = 10.0 Hz, 1H), 5.76 (d, *J* = 10.0 Hz, 1H), 3.77 (s, 3H).

**<sup>13</sup>C NMR** (100 MHz, CDCl<sub>3</sub>) δ 144.3, 142.9, 138.0, 137.5, 131.8, 130.4, 128.8, 128.7, 128.6, 128.3, 127.3, 127.0, 126.7, 125.0, 122.8, 121.9, 120.0, 119.2, 116.9, 116.3, 111.3, 109.4, 95.7.

85.0, 44.5, 32.8.

**HRMS** (ESI<sup>+</sup>): calcd. For [C<sub>30</sub>H<sub>23</sub>NSBr]<sup>+</sup>(M + H)<sup>+</sup>: 507.0656, found: 507.0575.

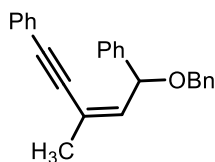

**(Z)-5-(Benzyloxy)-3-methylpent-3-en-1-yne-1,5-diyl dibenzene (5k)**: 277.5 mg, 82% isolated yield, colorless liquid, *Z/E* = 9:1, **R<sub>f</sub>**(PE/EA = 20:1) = 0.3.

**<sup>1</sup>H NMR** (400 MHz, CDCl<sub>3</sub>) δ 7.47-7.45 (m, 3.2H), 7.38-7.19 (m, 15.6H), 7.07 (s, 1.8H), 6.16 (d, *J* = 7.2 Hz, 0.11H), 5.88 (d, *J* = 10.0 Hz, 1H), 5.53 (d, *J* = 9.2 Hz, 1H), 5.14 (d, *J* = 8.8 Hz, 1H), 4.63-4.55 (m, 2.4H), 1.97 (s, 3H), 1.93 (s, 0.33H).

**<sup>13</sup>C NMR** (100 MHz, CDCl<sub>3</sub>) δ 141.5, 138.6, 137.8, 131.61, 131.56, 128.7, 128.6, 128.44, 128.39, 128.37, 128.3, 127.9, 127.8, 127.6, 127.5, 126.8, 126.5, 123.2, 121.0, 94.1, 88.2, 79.1, 77.4, 70.2, 23.3.

**HRMS** (ESI<sup>+</sup>): calcd. For [C<sub>25</sub>H<sub>22</sub>ONa]<sup>+</sup>(M + Na)<sup>+</sup>: 361.1568, found: 361.1571.

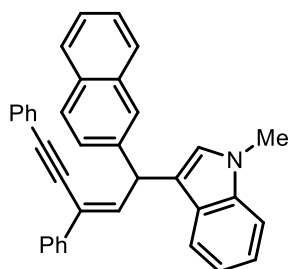

**(Z)-1-Methyl-3-(1-(naphthalen-2-yl)-3,5-diphenylpent-2-en-4-yn-1-yl)-1H-indole (5l)**: 322.0 mg, 68% isolated yield, white solid, >20:1 *Z/E*, **R<sub>f</sub>**(PE/DCM = 5:2) = 0.5.

**<sup>1</sup>H NMR** (400 MHz, CDCl<sub>3</sub>) δ 7.89-7.81 (m, 1H), 7.79-7.71 (m, 5H), 7.58-7.52 (m, 4H), 7.42-7.40 (m, 2H), 7.35-7.23 (m, 7H), 7.21-7.17 (m, 1H), 7.02-6.97 (m, 2H), 6.83-6.77 (m, 1H), 6.01-5.98 (m, 1H), 3.69 (s, 3H).

**<sup>13</sup>C NMR** (100 MHz, CDCl<sub>3</sub>) δ 140.9, 139.6, 138.1, 137.6, 133.8, 132.5, 131.8, 128.5, 128.3, 128.0, 127.9, 127.7, 127.5, 127.20, 127.17, 126.5, 126.4, 126.0, 125.6, 123.5, 123.3, 121.9, 120.2, 119.2, 116.8, 109.4, 96.2, 87.0, 44.9, 32.8.

**HRMS** (ESI<sup>+</sup>): calcd. For [C<sub>36</sub>H<sub>28</sub>N]<sup>+</sup>(M + H)<sup>+</sup>: 474.2222, found: 474.2217.

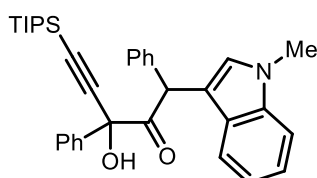

**3-Hydroxy-1-(1-methyl-1H-indol-3-yl)-1,3-diphenyl-5-(triisopropylsilyl) pent-4-yn-2-one (6)**: 44.2 mg, 55% isolated yield, brown viscous solid, *dr* = 7:1, **R<sub>f</sub>**(PE/EA = 20:3) = 0.3.

**<sup>1</sup>H NMR** (400 MHz, CDCl<sub>3</sub>) δ 8.16 (s, 0.14H), 7.96-7.94 (m, 0.14H), 7.90-7.88 (m, 1H), 7.75

(s, 1H), 7.67-7.62 (m, 2.5H), 7.55-7.50 (m, 1.4H), 7.43-7.17 (m, 13.8H), 7.05-7.02 (1, 1.3H), 6.00-5.98 (m, 1.2H), 3.27 (s, 0.43H), 3.02 (s, 3H), 1.18-1.16 (m, 24H).

$^{13}\text{C}$  NMR (100 MHz,  $\text{CDCl}_3$ )  $\delta$  199.5, 162.5, 140.7, 137.1, 136.9, 134.7, 132.7, 129.4, 129.2, 129.0, 128.9, 128.51, 128.49, 128.4, 128.3, 128.0, 127.9, 126.5, 125.4, 103.6, 98.6, 58.8, 34.1, 18.9, 11.5.

HRMS (ESI<sup>+</sup>): calcd. For  $[\text{C}_{35}\text{H}_{41}\text{NO}_2\text{SiNa}]^+$  (M + Na)<sup>+</sup>: 558.2804, found: 558.2806.

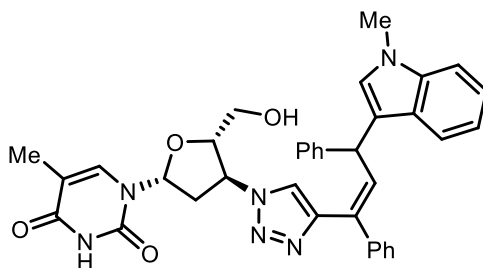

**1-((2R,4R,5S)-5-(Hydroxymethyl)-4-(4-((Z)-3-(1-methyl-1H-indol-3-yl)-1,3diphenylprop-1-en-1-yl)-1H-1,2,3-triazol-1-yl)tetrahydrofuran-2-yl)-5-methylpyrimidine-2,4(1H,3H)-dione (7):** 49.8 mg, 81% isolated yield, white solid, >20:1 Z/E,  $R_f$  (PE/EA = 5:4) = 0.4.

$^1\text{H}$  NMR (400 MHz,  $\text{CDCl}_3$ )  $\delta$  9.98-9.95 (m, 1H), 7.50-7.45 (m, 1H), 7.39-7.32 (m, 3H), 7.29-7.1 (m, 12H), 6.94-6.92 (m, 1H), 6.81 (d,  $J$  = 10.0 Hz, 1H), 6.56-6.53 (m, 1H), 6.15-6.14 (m, 1H), 5.61 (d,  $J$  = 10.0 Hz, 1H), 5.27-5.23 (m, 1H), 4.36 (s, 1H), 3.85-3.82 (m, 1H), 3.66-3.65 (m, 3H), 3.61-3.57 (m, 1H), 2.82-2.73 (m, 2H), 1.78 (s, 3H).

The spectroscopic data was in accordance with that reported in the literature.<sup>[1]</sup>

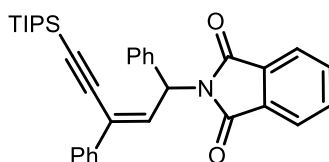

**(Z)-2-(1,3-Diphenyl-5-(triisopropylsilyl) pent-2-en-4-yn-1-yl) isoindoline-1,3-dione (8):** 38 mg, 37% isolated yield, white solid, >20:1 Z/E,  $R_f$  (PE/EA = 20:1) = 0.3.

$^1\text{H}$  NMR (400 MHz,  $\text{CDCl}_3$ )  $\delta$  7.85-7.83 (m 2H), 7.75-7.73 (m, 2H), 7.71-7.69 (m, 2H), 7.52-7.50 (m, 2H), 7.44 (d,  $J$  = 9.6 Hz, 1H), 7.39-7.23 (m, 6H), 6.83 (d,  $J$  = 9.6 Hz, 1H), 1.15-1.12 (m, 21H).

$^{13}\text{C}$  NMR (100 MHz,  $\text{CDCl}_3$ )  $\delta$  167.9, 139.1, 137.1, 134.1, 132.3, 132.2, 128.8, 128.5, 127.9, 127.5, 127.2, 126.6, 123.4, 102.4, 100.5, 54.8, 18.8, 11.4.

HRMS (ESI<sup>+</sup>): calcd. For  $[\text{C}_{34}\text{H}_{37}\text{NO}_2\text{SiNa}]^+$  (M + Na)<sup>+</sup>: 542.2491, found: 542.2491.

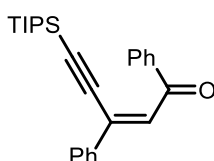

**(Z)-1,3-Diphenyl-5-(triisopropylsilyl) pent-2-en-4-yn-1-one (9):** 46.6 mg, 80% isolated

yield, yellow liquid, >20:1 Z/E,  $R_f$ (PE/DCM = 5:2) = 0.6.

$^1\text{H NMR}$  (400 MHz,  $\text{CDCl}_3$ )  $\delta$  8.05-8.00 (m, 2H), 7.87-7.81 (m, 2H), 7.59-7.53 (m, 1H), 7.50-7.41 (m, 5H), 7.39 (s, 1H), 1.09 (s, 21H).

$^{13}\text{C NMR}$  (100 MHz,  $\text{CDCl}_3$ )  $\delta$  191.1, 138.2, 137.5, 133.5, 133.0, 129.8, 129.6, 129.01, 128.97, 128.7, 128.6, 127.2, 105.1, 103.6, 18.8, 11.4.

$\text{HRMS}$  ( $\text{ESI}^+$ ): calcd. For  $[\text{C}_{26}\text{H}_{33}\text{OSi}]^+$  ( $\text{M} + \text{H}$ ) $^+$ : 389.2301, found: 389.2305.

### Unsuccessful examples

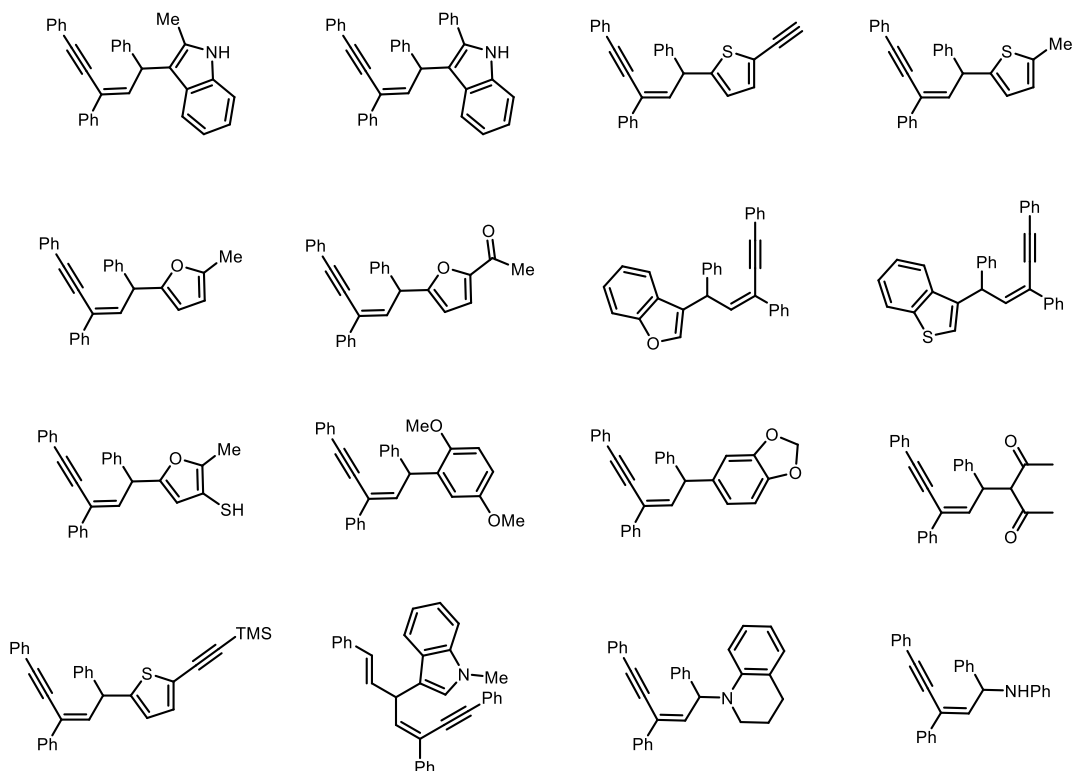

### 7 X-ray crystallographic analysis

Method for single crystals growth: **2a** (20 mg) was dissolved in ethyl acetate/hexane (v:v = 1:4, 4 mL) in a vial at room temperature. The vial was properly sealed with parafilm and kept at room temperature to allow the slow evaporation of the solvents until the single crystal was appeared.

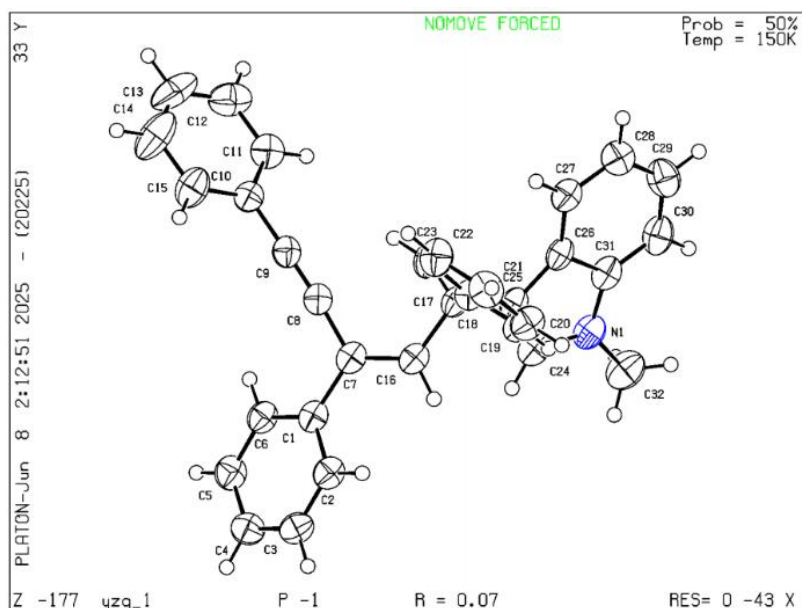

**Table 1 Crystal data and structure refinement for YZQ\_1.**

|                                    |                                   |
|------------------------------------|-----------------------------------|
| Identification code                | YZQ_1                             |
| Empirical formula                  | C <sub>32</sub> H <sub>25</sub> N |
| Formula weight                     | 423.53                            |
| Temperature/K                      | 149.95(10)                        |
| Crystal system                     | triclinic                         |
| Space group                        | P-1                               |
| a/Å                                | 10.2035(6)                        |
| b/Å                                | 10.3335(8)                        |
| c/Å                                | 11.6404(8)                        |
| α/°                                | 94.054(6)                         |
| β/°                                | 105.675(5)                        |
| γ/°                                | 95.557(5)                         |
| Volume/Å <sup>3</sup>              | 1170.12(14)                       |
| Z                                  | 2                                 |
| ρ <sub>calc</sub> /cm <sup>3</sup> | 1.202                             |
| μ/mm <sup>-1</sup>                 | 0.524                             |
| F(000)                             | 448.0                             |
| Crystal size/mm <sup>3</sup>       | 0.15 × 0.12 × 0.1                 |

|                                               |                                                               |
|-----------------------------------------------|---------------------------------------------------------------|
| Radiation                                     | Cu K $\alpha$ ( $\lambda = 1.54184$ )                         |
| 2 $\Theta$ range for data collection/         | $^{\circ}7.93$ to $149.54$                                    |
| Index ranges                                  | $-8 \leq h \leq 12, -12 \leq k \leq 12, -14 \leq l \leq 14$   |
| Reflections collected                         | 11437                                                         |
| Independent reflections                       | 4464 [ $R_{\text{int}} = 0.0366, R_{\text{sigma}} = 0.0309$ ] |
| Data/restraints/parameters                    | 4464/0/299                                                    |
| Goodness-of-fit on $F^2$                      | 1.047                                                         |
| Final R indexes [ $I \geq 2\sigma(I)$ ]       | $R_1 = 0.0659, wR_2 = 0.1775$                                 |
| Final R indexes [all data]                    | $R_1 = 0.0758, wR_2 = 0.1856$                                 |
| Largest diff. peak/hole / e $\text{\AA}^{-3}$ | 0.29/-0.24                                                    |

**Crystal Data** for  $C_{32}H_{25}N$  ( $M = 423.53$  g/mol): triclinic, space group P-1 (no. 2),  $a = 10.2035(6)$   $\text{\AA}$ ,  $b = 10.3335(8)$   $\text{\AA}$ ,  $c = 11.6404(8)$   $\text{\AA}$ ,  $\alpha = 94.054(6)^{\circ}$ ,  $\beta = 105.675(5)^{\circ}$ ,  $\gamma = 95.557(5)^{\circ}$ ,  $V = 1170.12(14)$   $\text{\AA}^3$ ,  $Z = 2$ ,  $T = 149.95(10)$  K,  $\mu(\text{Cu K}\alpha) = 0.524$   $\text{mm}^{-1}$ ,  $D_{\text{calc}} = 1.202$   $\text{g/cm}^3$ , 11437 reflections measured ( $7.93^{\circ} \leq 2\Theta \leq 149.54^{\circ}$ ), 4464 unique ( $R_{\text{int}} = 0.0366$ ,  $R_{\text{sigma}} = 0.0309$ ) which were used in all calculations. The final  $R_1$  was 0.0659 ( $I > 2\sigma(I)$ ) and  $wR_2$  was 0.1856 (all data).

**Table 2 Fractional Atomic Coordinates ( $\times 10^4$ ) and Equivalent Isotropic Displacement Parameters ( $\text{\AA}^2 \times 10^3$ ) for YZQ\_1.  $U_{\text{eq}}$  is defined as 1/3 of the trace of the orthogonalised  $U_{\text{IJ}}$  tensor.**

| Atom            | x          | y          | z          | U(eq)   |
|-----------------|------------|------------|------------|---------|
| N <sub>1</sub>  | 1564.9(16) | 7187.2(17) | 6993.0(16) | 46.4(4) |
| C <sub>1</sub>  | 6487.6(18) | 7267.0(19) | 4620.8(17) | 38.6(4) |
| C <sub>2</sub>  | 6588(2)    | 8582.6(19) | 4404.9(18) | 43.4(5) |
| C <sub>3</sub>  | 6656(2)    | 8943(2)    | 3301.2(19) | 47.3(5) |
| C <sub>4</sub>  | 6628(2)    | 8002(2)    | 2382.2(19) | 48.2(5) |
| C <sub>5</sub>  | 6582(2)    | 6702(2)    | 2599.4(19) | 48.1(5) |
| C <sub>6</sub>  | 6522(2)    | 6336(2)    | 3704.4(18) | 42.3(5) |
| C <sub>7</sub>  | 6281.0(19) | 6843.5(18) | 5761.7(17) | 38.9(4) |
| C <sub>8</sub>  | 6831.4(19) | 5672.4(19) | 6141.6(17) | 38.9(4) |
| C <sub>9</sub>  | 7319.6(19) | 4676.5(19) | 6398.7(17) | 39.8(4) |
| C <sub>10</sub> | 7863.6(19) | 3472.8(19) | 6658.8(16) | 39.5(4) |

**Table 2 Fractional Atomic Coordinates ( $\times 10^4$ ) and Equivalent Isotropic Displacement Parameters ( $\text{\AA}^2 \times 10^3$ ) for YZQ\_1.  $U_{\text{eq}}$  is defined as 1/3 of the trace of the orthogonalised  $U_{ij}$  tensor.**

| Atom            | <i>x</i>   | <i>y</i>   | <i>z</i>    | $U(\text{eq})$ |
|-----------------|------------|------------|-------------|----------------|
| C <sub>11</sub> | 7039(2)    | 2413(2)    | 6869.5(19)  | 49.5(5)        |
| C <sub>12</sub> | 7550(3)    | 1242(2)    | 7076(2)     | 63.9(7)        |
| C <sub>13</sub> | 8876(3)    | 1103(3)    | 7083(3)     | 76.4(9)        |
| C <sub>14</sub> | 9698(3)    | 2141(3)    | 6886(3)     | 82.6(9)        |
| C <sub>15</sub> | 9210(2)    | 3320(3)    | 6688(2)     | 59.7(6)        |
| C <sub>16</sub> | 5568.8(19) | 7488.0(19) | 6389.6(17)  | 39.7(4)        |
| C <sub>17</sub> | 5328.7(18) | 7129.3(18) | 7546.5(17)  | 37.5(4)        |
| C <sub>18</sub> | 6309.8(18) | 8066.4(18) | 8572.6(17)  | 37.3(4)        |
| C <sub>19</sub> | 5961(2)    | 9256(2)    | 8934.3(19)  | 44.8(5)        |
| C <sub>20</sub> | 6914(2)    | 10132(2)   | 9794(2)     | 49.9(5)        |
| C <sub>21</sub> | 8201(2)    | 9810(2)    | 10306.9(19) | 49.9(5)        |
| C <sub>22</sub> | 8551(2)    | 8610(2)    | 9974(2)     | 52.5(6)        |
| C <sub>23</sub> | 7607(2)    | 7740(2)    | 9109.8(19)  | 45.9(5)        |
| C <sub>24</sub> | 2756(2)    | 7368.0(19) | 6649.2(19)  | 43.5(5)        |
| C <sub>25</sub> | 3848.1(19) | 7096.6(17) | 7540.0(17)  | 38.0(4)        |
| C <sub>26</sub> | 3306.5(19) | 6717.1(17) | 8497.8(17)  | 38.1(4)        |
| C <sub>27</sub> | 3890(2)    | 6331.8(19) | 9633.8(18)  | 43.2(5)        |
| C <sub>28</sub> | 3057(2)    | 6024(2)    | 10355(2)    | 51.2(5)        |
| C <sub>29</sub> | 1640(2)    | 6093(2)    | 9968(2)     | 56.8(6)        |
| C <sub>30</sub> | 1034(2)    | 6459(2)    | 8850(2)     | 52.4(6)        |
| C <sub>31</sub> | 1874(2)    | 6780.3(19) | 8126.8(19)  | 42.7(5)        |
| C <sub>32</sub> | 212(2)     | 7429(3)    | 6294(2)     | 64.4(7)        |

**Table 3 Anisotropic Displacement Parameters ( $\text{\AA}^2 \times 10^3$ ) for YZQ\_1. The Anisotropic displacement factor exponent takes the form:  $-2\pi^2[h^2a^{*2}U_{11}+2hka^*b^*U_{12}+\dots]$ .**

| Atom            | $U_{11}$ | $U_{22}$ | $U_{33}$ | $U_{23}$ | $U_{13}$  | $U_{12}$ |
|-----------------|----------|----------|----------|----------|-----------|----------|
| N <sub>1</sub>  | 32.8(8)  | 47.8(10) | 51.2(10) | -0.6(8)  | 0.8(7)    | 5.3(7)   |
| C <sub>1</sub>  | 32.9(9)  | 39.0(10) | 37.8(10) | -4.2(7)  | 1.9(7)    | 3.6(7)   |
| C <sub>2</sub>  | 45.7(11) | 37.5(10) | 41.5(11) | -5.1(8)  | 5.6(8)    | 3.3(8)   |
| C <sub>3</sub>  | 46.3(11) | 39.7(10) | 51.3(12) | 3.7(9)   | 7.1(9)    | 2.8(8)   |
| C <sub>4</sub>  | 47.5(11) | 52.0(12) | 41.7(11) | 3.9(9)   | 7.7(9)    | 3.1(9)   |
| C <sub>5</sub>  | 51.4(12) | 48.2(12) | 41.1(11) | -5.3(9)  | 9.1(9)    | 6.2(9)   |
| C <sub>6</sub>  | 42.9(10) | 37.6(10) | 42.9(11) | -2.9(8)  | 7.4(8)    | 5.7(8)   |
| C <sub>7</sub>  | 33.3(9)  | 37.1(9)  | 39.6(10) | -4.5(7)  | 1.6(7)    | 2.1(7)   |
| C <sub>8</sub>  | 34.6(9)  | 42.3(10) | 36.8(10) | -1.9(8)  | 7.1(8)    | 2.9(8)   |
| C <sub>9</sub>  | 37.2(10) | 43.5(11) | 36.3(10) | -2.1(8)  | 8.5(8)    | 3.9(8)   |
| C <sub>10</sub> | 38.4(10) | 42.6(10) | 33.3(9)  | -1.1(7)  | 3.7(7)    | 5.8(8)   |
| C <sub>11</sub> | 47.5(12) | 49.0(12) | 46.6(12) | -2.3(9)  | 7.9(9)    | 0.4(9)   |
| C <sub>12</sub> | 88.9(19) | 42.2(12) | 50.4(13) | 0.3(10)  | 5.5(12)   | 0.7(12)  |
| C <sub>13</sub> | 86(2)    | 52.9(15) | 70.0(17) | -0.8(12) | -18.9(14) | 30.7(14) |
| C <sub>14</sub> | 47.4(14) | 72.2(19) | 110(2)   | -9.5(16) | -9.4(14)  | 24.6(13) |
| C <sub>15</sub> | 37.6(11) | 60.0(14) | 75.1(16) | -1.9(12) | 6.3(10)   | 8.1(10)  |
| C <sub>16</sub> | 37.4(10) | 36.4(10) | 40.3(10) | -1.8(8)  | 3.3(8)    | 6.3(7)   |
| C <sub>17</sub> | 34.5(9)  | 34.5(9)  | 40.4(10) | -2.9(7)  | 5.9(7)    | 6.7(7)   |
| C <sub>18</sub> | 33.9(9)  | 37.8(10) | 37.8(10) | -0.5(7)  | 8.0(7)    | 1.3(7)   |
| C <sub>19</sub> | 41.0(10) | 39.3(10) | 47.6(11) | -1.9(8)  | 2.5(8)    | 6.5(8)   |
| C <sub>20</sub> | 56.0(13) | 37.5(11) | 50.0(12) | -6.2(9)  | 8.1(10)   | 2.9(9)   |
| C <sub>21</sub> | 42.9(11) | 53.3(12) | 44.7(11) | -6.9(9)  | 4.8(9)    | -7.7(9)  |
| C <sub>22</sub> | 34.0(10) | 63.2(14) | 52.4(13) | -4.8(10) | 2.4(9)    | 2.8(9)   |
| C <sub>23</sub> | 35.6(10) | 48.8(11) | 49.7(12) | -5.4(9)  | 7.6(8)    | 7.9(8)   |
| C <sub>24</sub> | 39.7(10) | 40.4(10) | 44.5(11) | -2.2(8)  | 3.7(8)    | 4.5(8)   |
| C <sub>25</sub> | 35.5(9)  | 31.6(9)  | 42.1(10) | -6.9(7)  | 5.2(8)    | 4.2(7)   |

**Table 3 Anisotropic Displacement Parameters ( $\text{\AA}^2 \times 10^3$ ) for YZQ\_1. The Anisotropic displacement factor exponent takes the form:  $-2\pi^2[h^2a^{*2}U_{11}+2hka^*b^*U_{12}+\dots]$ .**

| Atom            | $U_{11}$ | $U_{22}$ | $U_{33}$ | $U_{23}$ | $U_{13}$ | $U_{12}$ |
|-----------------|----------|----------|----------|----------|----------|----------|
| C <sub>26</sub> | 35.1(9)  | 29.8(9)  | 44.5(10) | -7.7(7)  | 5.6(8)   | 4.9(7)   |
| C <sub>27</sub> | 41.0(10) | 40.0(10) | 43.1(11) | -4.2(8)  | 4.5(8)   | 5.8(8)   |
| C <sub>28</sub> | 51.4(12) | 50.1(12) | 49.2(12) | 0.2(9)   | 11.4(10) | 2.3(9)   |
| C <sub>29</sub> | 51.8(13) | 58.4(14) | 59.9(14) | -3.0(11) | 20.9(11) | -4.5(10) |
| C <sub>30</sub> | 36.0(10) | 50.5(12) | 66.4(14) | -7.8(10) | 12.0(10) | 1.5(9)   |
| C <sub>31</sub> | 36.2(10) | 36.8(10) | 49.4(11) | -5.4(8)  | 5.6(8)   | 2.5(7)   |
| C <sub>32</sub> | 38.6(12) | 73.5(17) | 71.0(16) | 7.0(13)  | -2.8(11) | 10.4(11) |

**Table 4 Bond Lengths for YZQ\_1.**

| Atom            | Atom            | Length/ $\text{\AA}$ | Atom            | Atom            | Length/ $\text{\AA}$ |
|-----------------|-----------------|----------------------|-----------------|-----------------|----------------------|
| N <sub>1</sub>  | C <sub>24</sub> | 1.379(3)             | C <sub>14</sub> | C <sub>15</sub> | 1.372(4)             |
| N <sub>1</sub>  | C <sub>31</sub> | 1.377(3)             | C <sub>16</sub> | C <sub>17</sub> | 1.497(3)             |
| N <sub>1</sub>  | C <sub>32</sub> | 1.455(3)             | C <sub>17</sub> | C <sub>18</sub> | 1.539(2)             |
| C <sub>1</sub>  | C <sub>2</sub>  | 1.399(3)             | C <sub>17</sub> | C <sub>25</sub> | 1.506(3)             |
| C <sub>1</sub>  | C <sub>6</sub>  | 1.395(3)             | C <sub>18</sub> | C <sub>19</sub> | 1.381(3)             |
| C <sub>1</sub>  | C <sub>7</sub>  | 1.488(3)             | C <sub>18</sub> | C <sub>23</sub> | 1.388(3)             |
| C <sub>2</sub>  | C <sub>3</sub>  | 1.380(3)             | C <sub>19</sub> | C <sub>20</sub> | 1.394(3)             |
| C <sub>3</sub>  | C <sub>4</sub>  | 1.386(3)             | C <sub>20</sub> | C <sub>21</sub> | 1.372(3)             |
| C <sub>4</sub>  | C <sub>5</sub>  | 1.383(3)             | C <sub>21</sub> | C <sub>22</sub> | 1.381(3)             |
| C <sub>5</sub>  | C <sub>6</sub>  | 1.381(3)             | C <sub>22</sub> | C <sub>23</sub> | 1.389(3)             |
| C <sub>7</sub>  | C <sub>8</sub>  | 1.431(3)             | C <sub>24</sub> | C <sub>25</sub> | 1.369(3)             |
| C <sub>7</sub>  | C <sub>16</sub> | 1.348(3)             | C <sub>25</sub> | C <sub>26</sub> | 1.434(3)             |
| C <sub>8</sub>  | C <sub>9</sub>  | 1.208(3)             | C <sub>26</sub> | C <sub>27</sub> | 1.399(3)             |
| C <sub>9</sub>  | C <sub>10</sub> | 1.429(3)             | C <sub>26</sub> | C <sub>31</sub> | 1.417(3)             |
| C <sub>10</sub> | C <sub>11</sub> | 1.393(3)             | C <sub>27</sub> | C <sub>28</sub> | 1.378(3)             |

**Table 4 Bond Lengths for YZQ\_1.**

| Atom            | Atom            | Length/Å | Atom            | Atom            | Length/Å |
|-----------------|-----------------|----------|-----------------|-----------------|----------|
| C <sub>10</sub> | C <sub>15</sub> | 1.389(3) | C <sub>28</sub> | C <sub>29</sub> | 1.403(3) |
| C <sub>11</sub> | C <sub>12</sub> | 1.375(3) | C <sub>29</sub> | C <sub>30</sub> | 1.379(3) |
| C <sub>12</sub> | C <sub>13</sub> | 1.372(4) | C <sub>30</sub> | C <sub>31</sub> | 1.388(3) |
| C <sub>13</sub> | C <sub>14</sub> | 1.368(5) |                 |                 |          |

**Table 5 Bond Angles for YZQ\_1.**

| Atom            | Atom            | Atom            | Angle/°    | Atom            | Atom            | Atom            | Angle/°    |
|-----------------|-----------------|-----------------|------------|-----------------|-----------------|-----------------|------------|
| C <sub>24</sub> | N <sub>1</sub>  | C <sub>32</sub> | 125.8(2)   | C <sub>16</sub> | C <sub>17</sub> | C <sub>18</sub> | 108.13(15) |
| C <sub>31</sub> | N <sub>1</sub>  | C <sub>24</sub> | 108.68(16) | C <sub>16</sub> | C <sub>17</sub> | C <sub>25</sub> | 112.69(16) |
| C <sub>31</sub> | N <sub>1</sub>  | C <sub>32</sub> | 125.49(19) | C <sub>25</sub> | C <sub>17</sub> | C <sub>18</sub> | 113.28(15) |
| C <sub>2</sub>  | C <sub>1</sub>  | C <sub>7</sub>  | 122.04(17) | C <sub>19</sub> | C <sub>18</sub> | C <sub>17</sub> | 121.77(17) |
| C <sub>6</sub>  | C <sub>1</sub>  | C <sub>2</sub>  | 117.94(19) | C <sub>19</sub> | C <sub>18</sub> | C <sub>23</sub> | 118.92(17) |
| C <sub>6</sub>  | C <sub>1</sub>  | C <sub>7</sub>  | 119.96(18) | C <sub>23</sub> | C <sub>18</sub> | C <sub>17</sub> | 119.24(17) |
| C <sub>3</sub>  | C <sub>2</sub>  | C <sub>1</sub>  | 120.95(18) | C <sub>18</sub> | C <sub>19</sub> | C <sub>20</sub> | 120.41(19) |
| C <sub>2</sub>  | C <sub>3</sub>  | C <sub>4</sub>  | 120.4(2)   | C <sub>21</sub> | C <sub>20</sub> | C <sub>19</sub> | 120.3(2)   |
| C <sub>5</sub>  | C <sub>4</sub>  | C <sub>3</sub>  | 119.1(2)   | C <sub>20</sub> | C <sub>21</sub> | C <sub>22</sub> | 119.84(19) |
| C <sub>6</sub>  | C <sub>5</sub>  | C <sub>4</sub>  | 120.71(19) | C <sub>21</sub> | C <sub>22</sub> | C <sub>23</sub> | 120.0(2)   |
| C <sub>5</sub>  | C <sub>6</sub>  | C <sub>1</sub>  | 120.76(19) | C <sub>18</sub> | C <sub>23</sub> | C <sub>22</sub> | 120.52(19) |
| C <sub>8</sub>  | C <sub>7</sub>  | C <sub>1</sub>  | 116.44(17) | C <sub>25</sub> | C <sub>24</sub> | N <sub>1</sub>  | 110.42(19) |
| C <sub>16</sub> | C <sub>7</sub>  | C <sub>1</sub>  | 122.48(18) | C <sub>24</sub> | C <sub>25</sub> | C <sub>17</sub> | 128.82(19) |
| C <sub>16</sub> | C <sub>7</sub>  | C <sub>8</sub>  | 121.03(18) | C <sub>24</sub> | C <sub>25</sub> | C <sub>26</sub> | 106.19(17) |
| C <sub>9</sub>  | C <sub>8</sub>  | C <sub>7</sub>  | 176.0(2)   | C <sub>26</sub> | C <sub>25</sub> | C <sub>17</sub> | 124.96(17) |
| C <sub>8</sub>  | C <sub>9</sub>  | C <sub>10</sub> | 177.7(2)   | C <sub>27</sub> | C <sub>26</sub> | C <sub>25</sub> | 133.85(18) |
| C <sub>11</sub> | C <sub>10</sub> | C <sub>9</sub>  | 120.30(18) | C <sub>27</sub> | C <sub>26</sub> | C <sub>31</sub> | 118.76(19) |
| C <sub>15</sub> | C <sub>10</sub> | C <sub>9</sub>  | 121.29(19) | C <sub>31</sub> | C <sub>26</sub> | C <sub>25</sub> | 107.39(17) |
| C <sub>15</sub> | C <sub>10</sub> | C <sub>11</sub> | 118.4(2)   | C <sub>28</sub> | C <sub>27</sub> | C <sub>26</sub> | 119.12(19) |
| C <sub>12</sub> | C <sub>11</sub> | C <sub>10</sub> | 120.2(2)   | C <sub>27</sub> | C <sub>28</sub> | C <sub>29</sub> | 121.1(2)   |

**Table 4 Bond Lengths for YZQ\_1.**

| Atom            | Atom            | Length/Å        | Atom       | Atom            | Length/Å        |                 |            |
|-----------------|-----------------|-----------------|------------|-----------------|-----------------|-----------------|------------|
| C <sub>13</sub> | C <sub>12</sub> | C <sub>11</sub> | 120.6(2)   | C <sub>30</sub> | C <sub>29</sub> | C <sub>28</sub> | 121.1(2)   |
| C <sub>14</sub> | C <sub>13</sub> | C <sub>12</sub> | 119.6(2)   | C <sub>29</sub> | C <sub>30</sub> | C <sub>31</sub> | 117.8(2)   |
| C <sub>13</sub> | C <sub>14</sub> | C <sub>15</sub> | 120.6(3)   | N <sub>1</sub>  | C <sub>31</sub> | C <sub>26</sub> | 107.31(18) |
| C <sub>14</sub> | C <sub>15</sub> | C <sub>10</sub> | 120.5(2)   | N <sub>1</sub>  | C <sub>31</sub> | C <sub>30</sub> | 130.64(19) |
| C <sub>7</sub>  | C <sub>16</sub> | C <sub>17</sub> | 125.55(18) | C <sub>30</sub> | C <sub>31</sub> | C <sub>26</sub> | 122.0(2)   |

**Table 6 Torsion Angles for YZQ\_1.**

| A              | B               | C               | D               | Angle/°     | A               | B               | C               | D               | Angle/°     |
|----------------|-----------------|-----------------|-----------------|-------------|-----------------|-----------------|-----------------|-----------------|-------------|
| N <sub>1</sub> | C <sub>24</sub> | C <sub>25</sub> | C <sub>17</sub> | 178.38(17)  | C <sub>17</sub> | C <sub>25</sub> | C <sub>26</sub> | C <sub>27</sub> | 1.9(3)      |
| N <sub>1</sub> | C <sub>24</sub> | C <sub>25</sub> | C <sub>26</sub> | 0.3(2)      | C <sub>17</sub> | C <sub>25</sub> | C <sub>26</sub> | C <sub>31</sub> | -178.21(16) |
| C <sub>1</sub> | C <sub>2</sub>  | C <sub>3</sub>  | C <sub>4</sub>  | 0.0(3)      | C <sub>18</sub> | C <sub>17</sub> | C <sub>25</sub> | C <sub>24</sub> | 121.9(2)    |
| C <sub>1</sub> | C <sub>7</sub>  | C <sub>16</sub> | C <sub>17</sub> | -179.43(17) | C <sub>18</sub> | C <sub>17</sub> | C <sub>25</sub> | C <sub>26</sub> | -60.3(2)    |
| C <sub>2</sub> | C <sub>1</sub>  | C <sub>6</sub>  | C <sub>5</sub>  | -3.3(3)     | C <sub>18</sub> | C <sub>19</sub> | C <sub>20</sub> | C <sub>21</sub> | -1.2(3)     |
| C <sub>2</sub> | C <sub>1</sub>  | C <sub>7</sub>  | C <sub>8</sub>  | -150.75(18) | C <sub>19</sub> | C <sub>18</sub> | C <sub>23</sub> | C <sub>22</sub> | -1.7(3)     |
| C <sub>2</sub> | C <sub>1</sub>  | C <sub>7</sub>  | C <sub>16</sub> | 31.8(3)     | C <sub>19</sub> | C <sub>20</sub> | C <sub>21</sub> | C <sub>22</sub> | -0.3(3)     |
| C <sub>2</sub> | C <sub>3</sub>  | C <sub>4</sub>  | C <sub>5</sub>  | -2.4(3)     | C <sub>20</sub> | C <sub>21</sub> | C <sub>22</sub> | C <sub>23</sub> | 0.8(4)      |
| C <sub>3</sub> | C <sub>4</sub>  | C <sub>5</sub>  | C <sub>6</sub>  | 2.0(3)      | C <sub>21</sub> | C <sub>22</sub> | C <sub>23</sub> | C <sub>18</sub> | 0.2(3)      |
| C <sub>4</sub> | C <sub>5</sub>  | C <sub>6</sub>  | C <sub>1</sub>  | 0.9(3)      | C <sub>23</sub> | C <sub>18</sub> | C <sub>19</sub> | C <sub>20</sub> | 2.2(3)      |
| C <sub>6</sub> | C <sub>1</sub>  | C <sub>2</sub>  | C <sub>3</sub>  | 2.9(3)      | C <sub>24</sub> | N <sub>1</sub>  | C <sub>31</sub> | C <sub>26</sub> | 0.4(2)      |
| C <sub>6</sub> | C <sub>1</sub>  | C <sub>7</sub>  | C <sub>8</sub>  | 32.3(3)     | C <sub>24</sub> | N <sub>1</sub>  | C <sub>31</sub> | C <sub>30</sub> | -179.2(2)   |
| C <sub>6</sub> | C <sub>1</sub>  | C <sub>7</sub>  | C <sub>16</sub> | -145.14(19) | C <sub>24</sub> | C <sub>25</sub> | C <sub>26</sub> | C <sub>27</sub> | -179.9(2)   |
| C <sub>7</sub> | C <sub>1</sub>  | C <sub>2</sub>  | C <sub>3</sub>  | -174.17(18) | C <sub>24</sub> | C <sub>25</sub> | C <sub>26</sub> | C <sub>31</sub> | 0.0(2)      |
| C <sub>7</sub> | C <sub>1</sub>  | C <sub>6</sub>  | C <sub>5</sub>  | 173.80(18)  | C <sub>25</sub> | C <sub>17</sub> | C <sub>18</sub> | C <sub>19</sub> | -38.1(3)    |
| C <sub>7</sub> | C <sub>16</sub> | C <sub>17</sub> | C <sub>18</sub> | 102.6(2)    | C <sub>25</sub> | C <sub>17</sub> | C <sub>18</sub> | C <sub>23</sub> | 145.19(19)  |
| C <sub>7</sub> | C <sub>16</sub> | C <sub>17</sub> | C <sub>25</sub> | -131.43(19) | C <sub>25</sub> | C <sub>26</sub> | C <sub>27</sub> | C <sub>28</sub> | 180.0(2)    |
| C <sub>8</sub> | C <sub>7</sub>  | C <sub>16</sub> | C <sub>17</sub> | 3.3(3)      | C <sub>25</sub> | C <sub>26</sub> | C <sub>31</sub> | N <sub>1</sub>  | -0.3(2)     |

**Table 6 Torsion Angles for YZQ\_1.**

| A               | B               | C               | D               | Angle/°     | A               | B               | C               | D               | Angle/°    |
|-----------------|-----------------|-----------------|-----------------|-------------|-----------------|-----------------|-----------------|-----------------|------------|
| C <sub>9</sub>  | C <sub>10</sub> | C <sub>11</sub> | C <sub>12</sub> | 177.62(19)  | C <sub>25</sub> | C <sub>26</sub> | C <sub>31</sub> | C <sub>30</sub> | 179.43(18) |
| C <sub>9</sub>  | C <sub>10</sub> | C <sub>15</sub> | C <sub>14</sub> | -177.1(2)   | C <sub>26</sub> | C <sub>27</sub> | C <sub>28</sub> | C <sub>29</sub> | -0.1(3)    |
| C <sub>10</sub> | C <sub>11</sub> | C <sub>12</sub> | C <sub>13</sub> | 0.3(4)      | C <sub>27</sub> | C <sub>26</sub> | C <sub>31</sub> | N <sub>1</sub>  | 179.65(16) |
| C <sub>11</sub> | C <sub>10</sub> | C <sub>15</sub> | C <sub>14</sub> | 1.8(4)      | C <sub>27</sub> | C <sub>26</sub> | C <sub>31</sub> | C <sub>30</sub> | -0.7(3)    |
| C <sub>11</sub> | C <sub>12</sub> | C <sub>13</sub> | C <sub>14</sub> | 0.2(4)      | C <sub>27</sub> | C <sub>28</sub> | C <sub>29</sub> | C <sub>30</sub> | 0.6(4)     |
| C <sub>12</sub> | C <sub>13</sub> | C <sub>14</sub> | C <sub>15</sub> | 0.3(5)      | C <sub>28</sub> | C <sub>29</sub> | C <sub>30</sub> | C <sub>31</sub> | -1.1(3)    |
| C <sub>13</sub> | C <sub>14</sub> | C <sub>15</sub> | C <sub>10</sub> | -1.3(4)     | C <sub>29</sub> | C <sub>30</sub> | C <sub>31</sub> | N <sub>1</sub>  | -179.2(2)  |
| C <sub>15</sub> | C <sub>10</sub> | C <sub>11</sub> | C <sub>12</sub> | -1.3(3)     | C <sub>29</sub> | C <sub>30</sub> | C <sub>31</sub> | C <sub>26</sub> | 1.2(3)     |
| C <sub>16</sub> | C <sub>17</sub> | C <sub>18</sub> | C <sub>19</sub> | 87.5(2)     | C <sub>31</sub> | N <sub>1</sub>  | C <sub>24</sub> | C <sub>25</sub> | -0.4(2)    |
| C <sub>16</sub> | C <sub>17</sub> | C <sub>18</sub> | C <sub>23</sub> | -89.2(2)    | C <sub>31</sub> | C <sub>26</sub> | C <sub>27</sub> | C <sub>28</sub> | 0.1(3)     |
| C <sub>16</sub> | C <sub>17</sub> | C <sub>25</sub> | C <sub>24</sub> | -1.3(3)     | C <sub>32</sub> | N <sub>1</sub>  | C <sub>24</sub> | C <sub>25</sub> | 177.6(2)   |
| C <sub>16</sub> | C <sub>17</sub> | C <sub>25</sub> | C <sub>26</sub> | 176.49(16)  | C <sub>32</sub> | N <sub>1</sub>  | C <sub>31</sub> | C <sub>26</sub> | -177.6(2)  |
| C <sub>17</sub> | C <sub>18</sub> | C <sub>19</sub> | C <sub>20</sub> | -174.45(19) | C <sub>32</sub> | N <sub>1</sub>  | C <sub>31</sub> | C <sub>30</sub> | 2.7(4)     |
| C <sub>17</sub> | C <sub>18</sub> | C <sub>23</sub> | C <sub>22</sub> | 175.0(2)    |                 |                 |                 |                 |            |

**Table 7 Hydrogen Atom Coordinates ( $\text{\AA} \times 10^4$ ) and Isotropic Displacement Parameters ( $\text{\AA}^2 \times 10^3$ ) for YZQ\_1.**

| Atom            | x       | y       | z       | U(eq) |
|-----------------|---------|---------|---------|-------|
| H <sub>2</sub>  | 6608.71 | 9237.72 | 5026.95 | 52    |
| H <sub>3</sub>  | 6723.27 | 9840.74 | 3170.63 | 57    |
| H <sub>4</sub>  | 6640.2  | 8246.71 | 1613.43 | 58    |
| H <sub>5</sub>  | 6591.18 | 6053.29 | 1981.86 | 58    |
| H <sub>6</sub>  | 6504.61 | 5439.87 | 3842.18 | 51    |
| H <sub>11</sub> | 6120.5  | 2498.85 | 6870.38 | 59    |
| H <sub>12</sub> | 6980.12 | 521.7   | 7215.49 | 77    |
| H <sub>13</sub> | 9222.09 | 289.85  | 7224.23 | 92    |

**Table 7 Hydrogen Atom Coordinates ( $\text{\AA} \times 10^4$ ) and Isotropic Displacement Parameters ( $\text{\AA}^2 \times 10^3$ ) for YZQ\_1.**

| Atom             | <i>x</i> | <i>y</i> | <i>z</i> | U(eq) |
|------------------|----------|----------|----------|-------|
| H <sub>14</sub>  | 10614.45 | 2044.59  | 6886.85  | 99    |
| H <sub>15</sub>  | 9797.15  | 4038.66  | 6568.78  | 72    |
| H <sub>16</sub>  | 5186.94  | 8233.06  | 6071.01  | 48    |
| H <sub>17</sub>  | 5589.67  | 6229.24  | 7660.68  | 45    |
| H <sub>19</sub>  | 5065.13  | 9478.89  | 8594.59  | 54    |
| H <sub>20</sub>  | 6670.97  | 10954.8  | 10026.75 | 60    |
| H <sub>21</sub>  | 8850.65  | 10410.31 | 10889.86 | 60    |
| H <sub>22</sub>  | 9438.39  | 8380.41  | 10335.06 | 63    |
| H <sub>23</sub>  | 7850.97  | 6914.68  | 8885     | 55    |
| H <sub>24</sub>  | 2810.08  | 7642.26  | 5899.83  | 52    |
| H <sub>27</sub>  | 4847.73  | 6283.14  | 9904.85  | 52    |
| H <sub>28</sub>  | 3447.74  | 5759.95  | 11126.36 | 61    |
| H <sub>29</sub>  | 1090.31  | 5883.59  | 10486    | 68    |
| H <sub>30</sub>  | 73.26    | 6491.37  | 8582.93  | 63    |
| H <sub>32A</sub> | -307.79  | 6602.74  | 5876.21  | 97    |
| H <sub>32B</sub> | 308.14   | 8037.32  | 5705.21  | 97    |
| H <sub>32C</sub> | -274.77  | 7808.1   | 6829.88  | 97    |

## 8 $^1\text{H}$ , $^{13}\text{C}$ NMR and HRMS characterization data

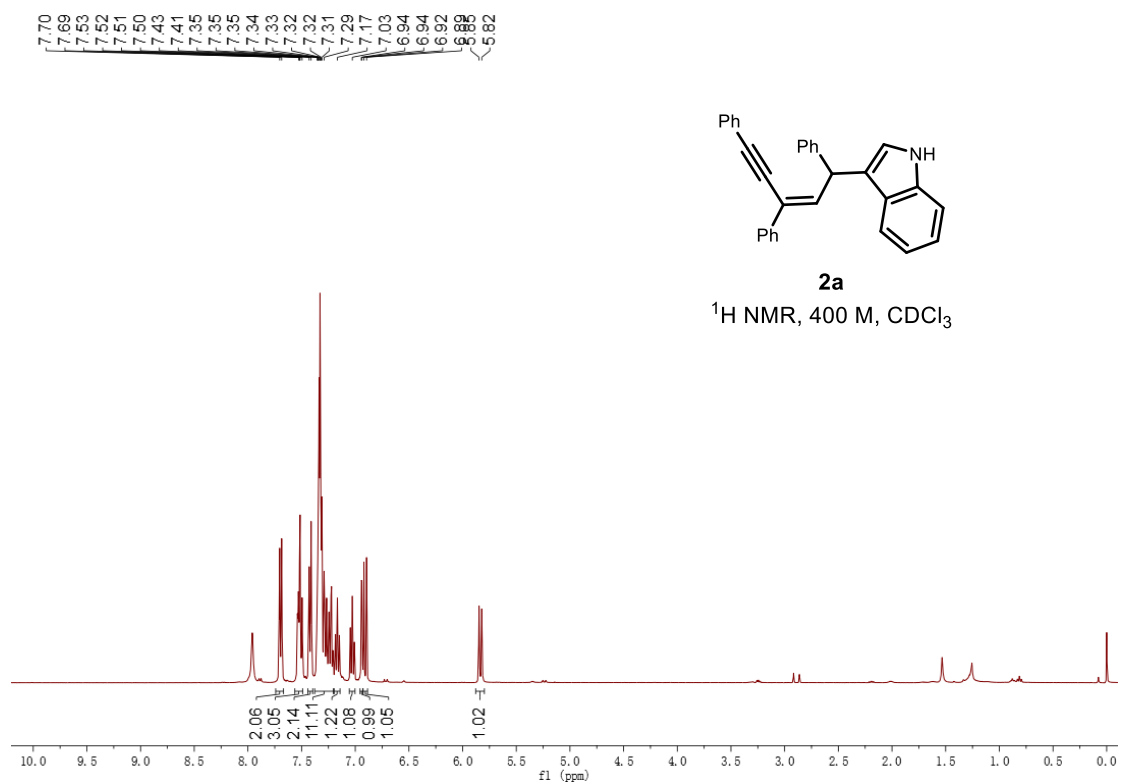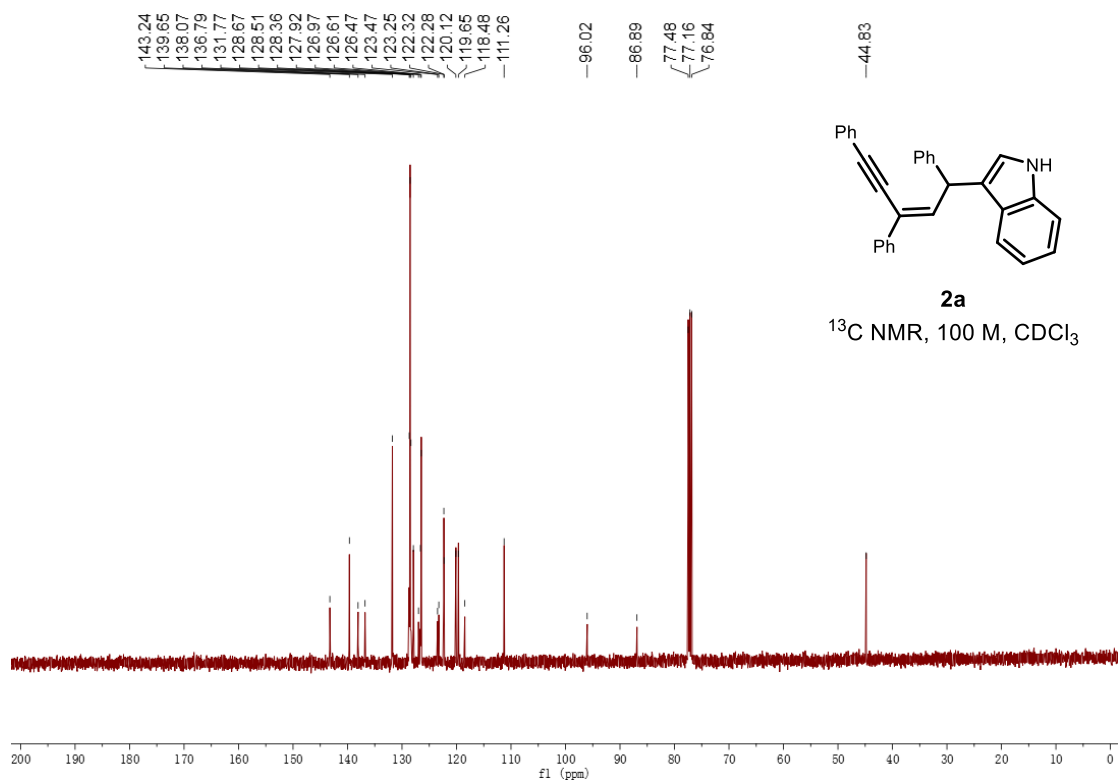

# HRMS spectrum

## Elemental Composition Report

Page 1

### Single Mass Analysis

Tolerance = 5.0 mDa / DBE: min = -1.5, max = 50.0

Element prediction: Off

Number of isotope peaks used for i-FIT = 3

Monoisotopic Mass, Even Electron Ions

1361 formula(e) evaluated with 1 results within limits (up to 50 best isotopic matches for each mass)

Elements Used:

C: 31-31 H: 24-24 N: 0-50 O: 0-50 Na: 0-3

32

250109-11-723-2-11 28 (0.090)

1: TOF MS ES+  
2.04e+004

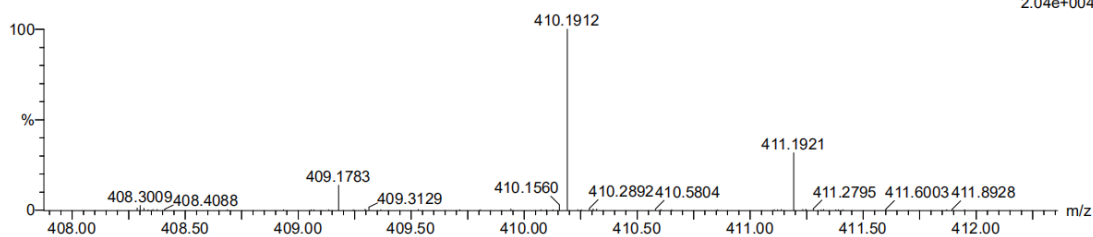

Minimum: -1.5  
Maximum: 5.0 10.0 50.0

| Mass     | Calc. Mass | mDa | PPM | DBE  | i-FIT | Norm | Conf(%) | Formula   |
|----------|------------|-----|-----|------|-------|------|---------|-----------|
| 410.1912 | 410.1909   | 0.3 | 0.7 | 20.5 | 209.8 | n/a  | n/a     | C31 H24 N |

7.67  
7.67  
7.65  
7.61  
7.50  
7.49  
7.36  
7.34  
7.33  
7.31  
7.30  
7.30  
7.29  
7.28  
7.26  
7.20  
7.18  
7.13  
7.13  
6.89  
6.89  
6.82  
6.82  
5.72

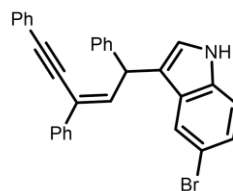

<sup>1</sup>H NMR, 400 M, CDCl<sub>3</sub>

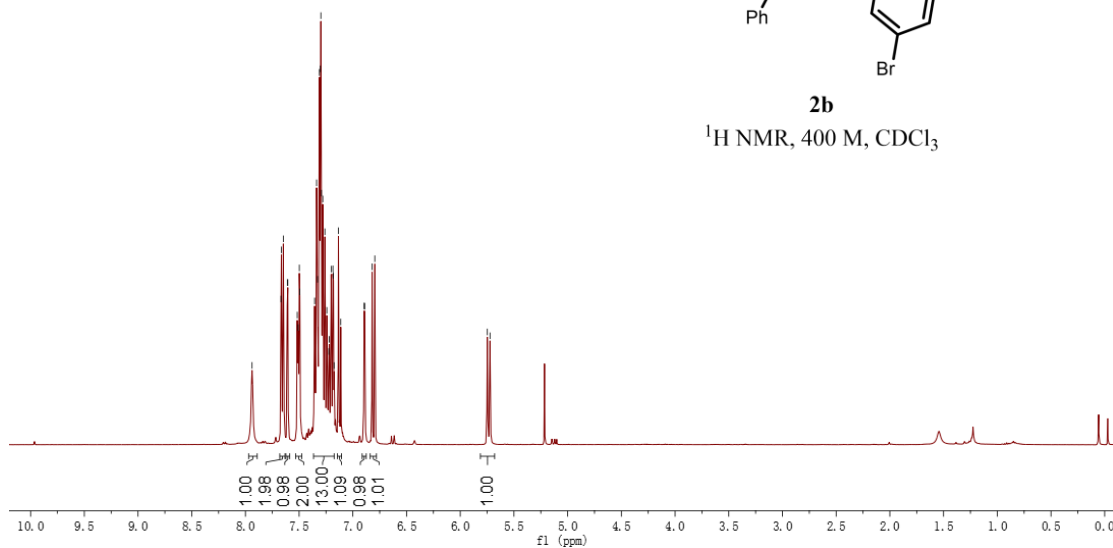

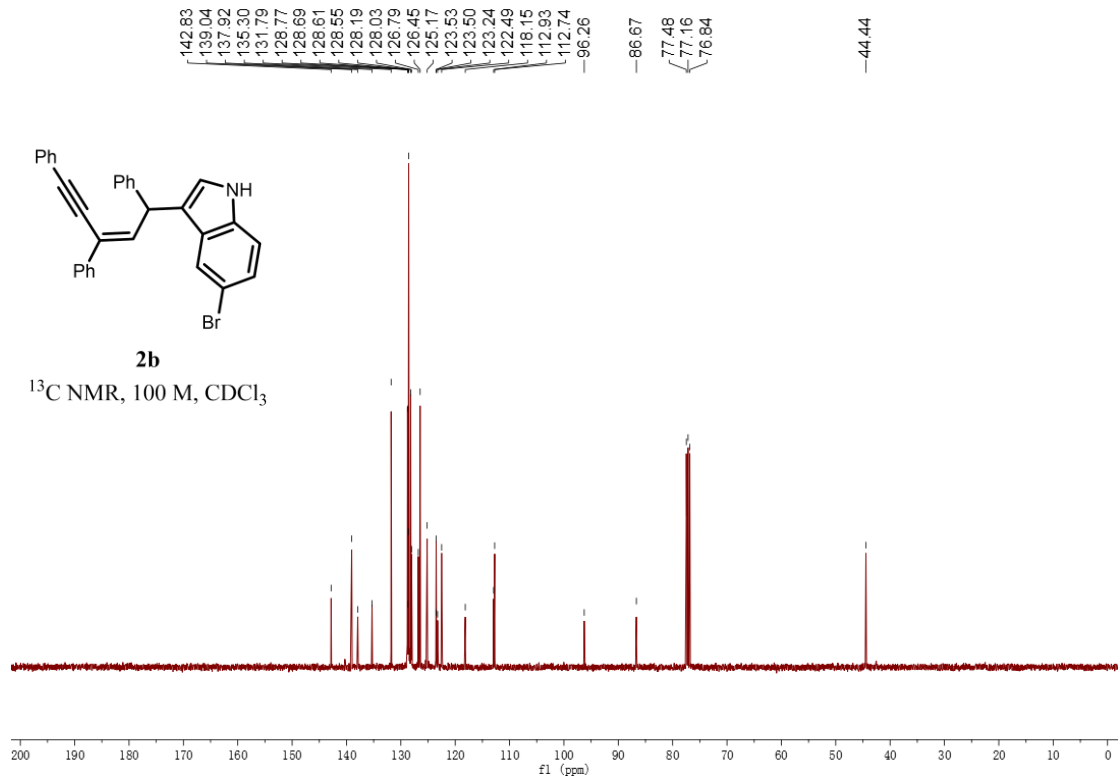

### HRMS spectrum

#### Elemental Composition Report

Page 1

#### Single Mass Analysis

Tolerance = 5.0 mDa / DBE: min = -1.5, max = 50.0

Element prediction: Off

Number of isotope peaks used for i-FIT = 3

Monoisotopic Mass, Even Electron Ions

2708 formula(e) evaluated with 1 results within limits (up to 50 best isotopic matches for each mass)

Elements Used:

C: 31-31 H: 23-23 N: 0-50 O: 0-50 Na: 0-3 Br: 1-3

32

250109-11-723-2-10 21 (0.077)

1: TOF MS ES+  
8.81e+002

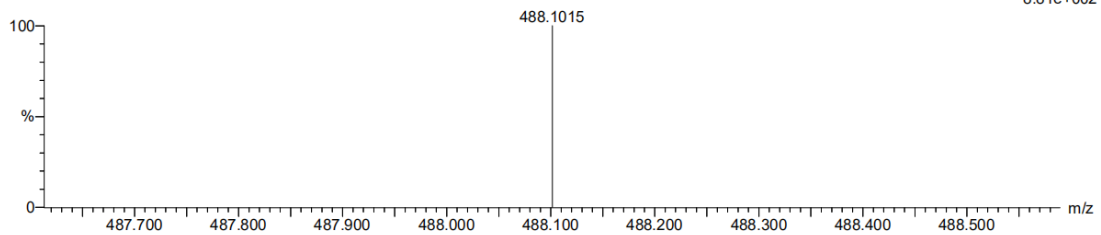

Minimum: -1.5  
 Maximum: 10.0

| Mass     | Calc. Mass | mDa | PPM | DBE  | i-FIT | Norm | Conf (%) | Formula      |
|----------|------------|-----|-----|------|-------|------|----------|--------------|
| 488.1015 | 488.1014   | 0.1 | 0.2 | 20.5 | 24.7  | n/a  | n/a      | C31 H23 N Br |

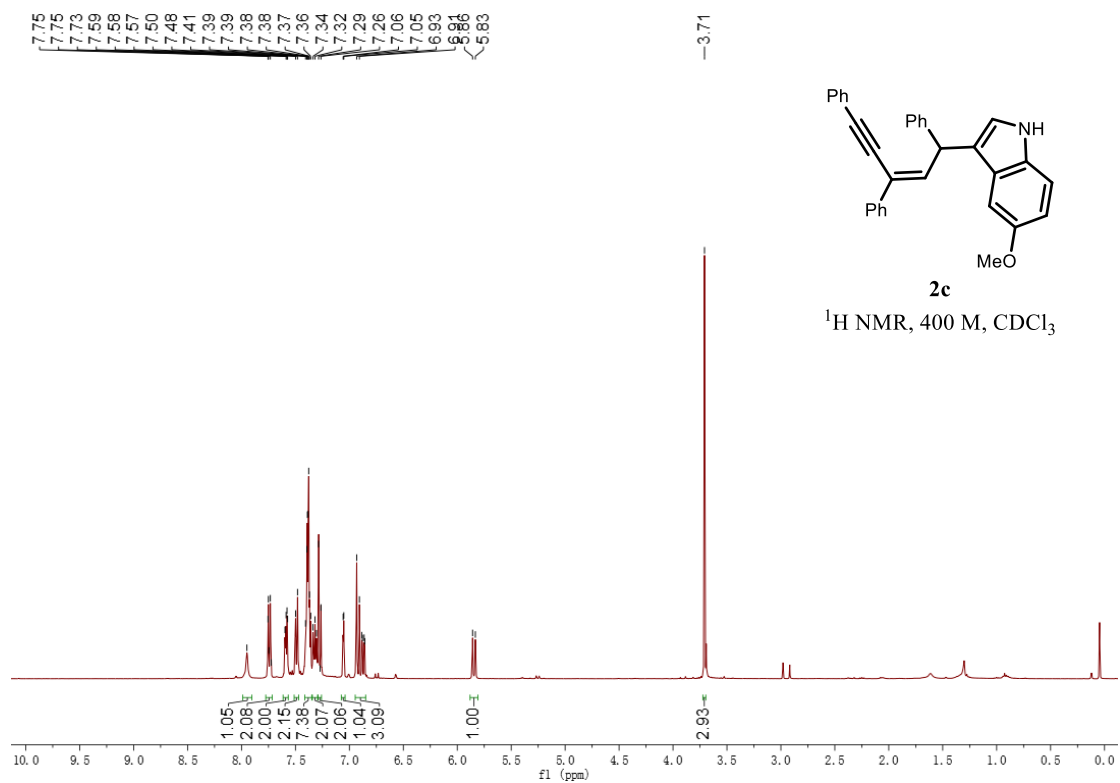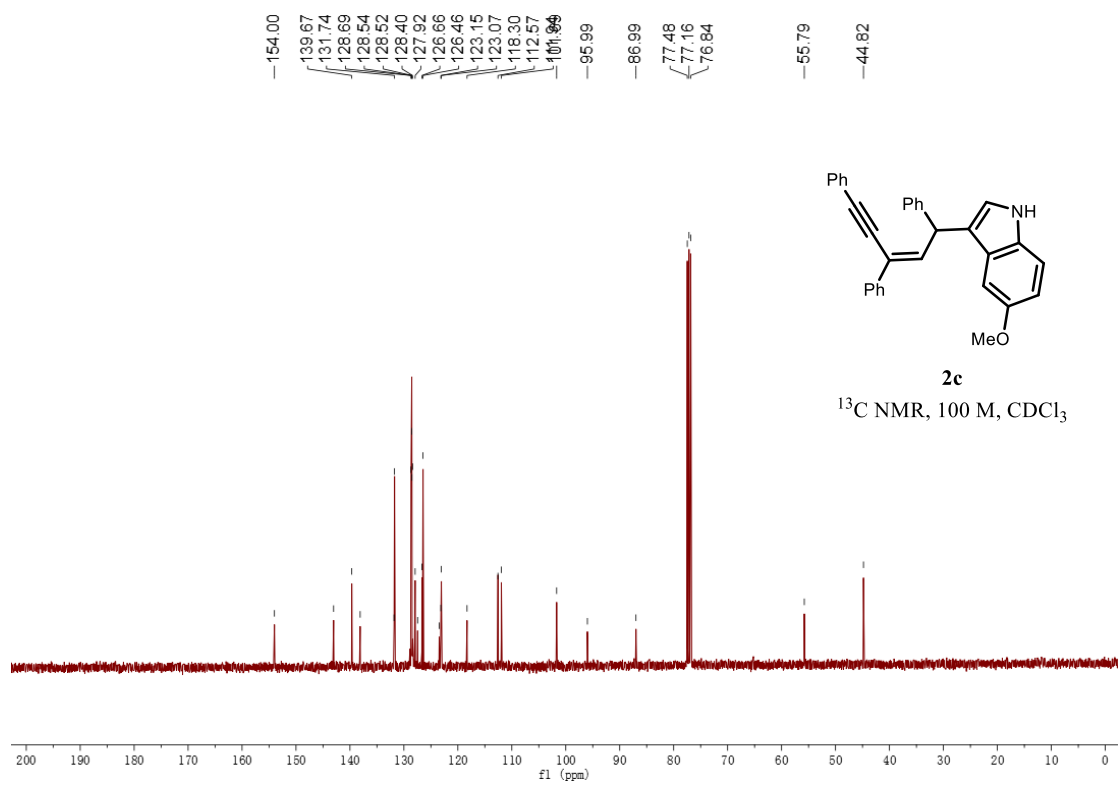

# HRMS spectrum

## Elemental Composition Report

Page 1

### Single Mass Analysis

Tolerance = 5.0 mDa / DBE: min = -1.5, max = 50.0

Element prediction: Off

Number of isotope peaks used for i-FIT = 3

Monoisotopic Mass, Even Electron Ions

1567 formula(e) evaluated with 1 results within limits (up to 50 best isotopic matches for each mass)

Elements Used:

C: 32-32 H: 26-26 N: 0-50 O: 0-50 Na: 0-3

32

250109-11-723-2-8 26 (0.086)

1: TOF MS ES+  
1.68e+004

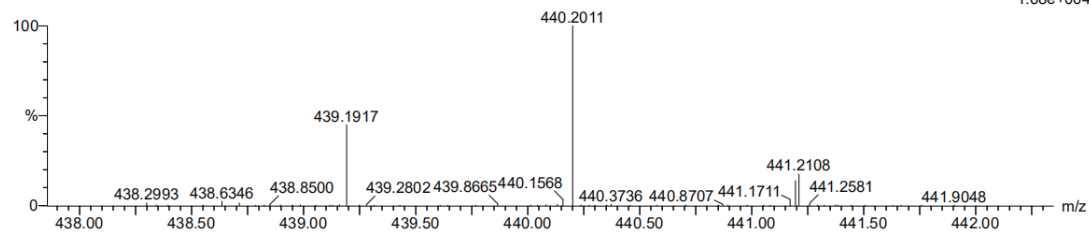

Minimum: -1.5  
Maximum: 5.0 10.0 50.0

| Mass     | Calc. Mass | mDa  | PPM  | DBE  | i-FIT | Norm | Conf (%) | Formula     |
|----------|------------|------|------|------|-------|------|----------|-------------|
| 440.2011 | 440.2014   | -0.3 | -0.7 | 20.5 | 237.6 | n/a  | n/a      | C32 H26 N O |

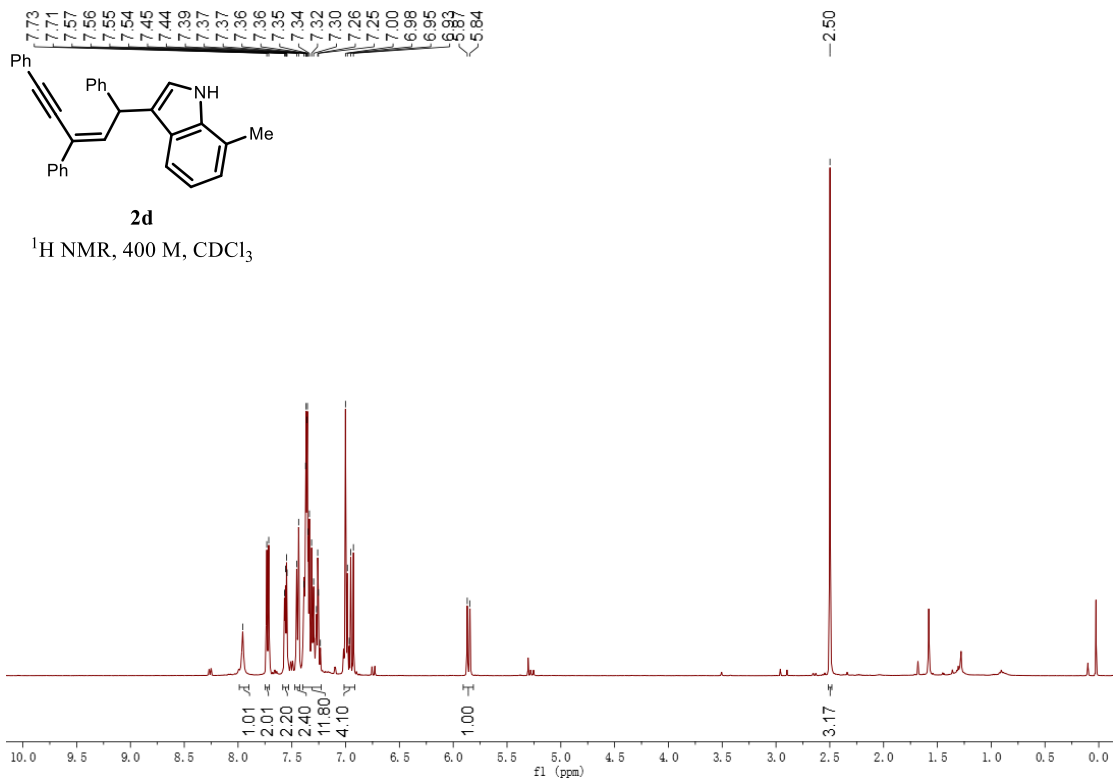

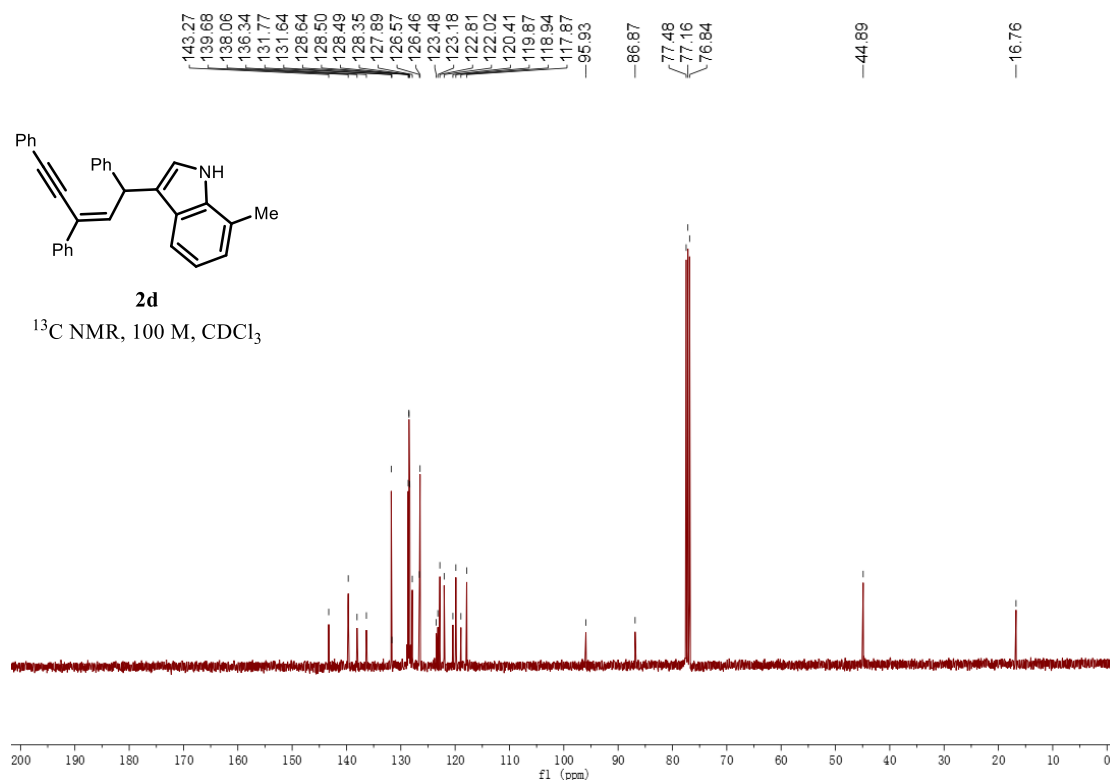

## HRMS spectrum

### Elemental Composition Report

Page 1

#### Single Mass Analysis

Tolerance = 5.0 mDa / DBE: min = -1.5, max = 50.0

Element prediction: Off

Number of isotope peaks used for i-FIT = 3

Monoisotopic Mass, Even Electron Ions

1459 formula(e) evaluated with 1 results within limits (up to 50 best isotopic matches for each mass)

Elements Used:

C: 32-32 H: 26-26 N: 0-50 O: 0-50 Na: 0-3

32

250109-11-723-2-4 27 (0.088)

1: TOF MS ES+  
3.91e+004

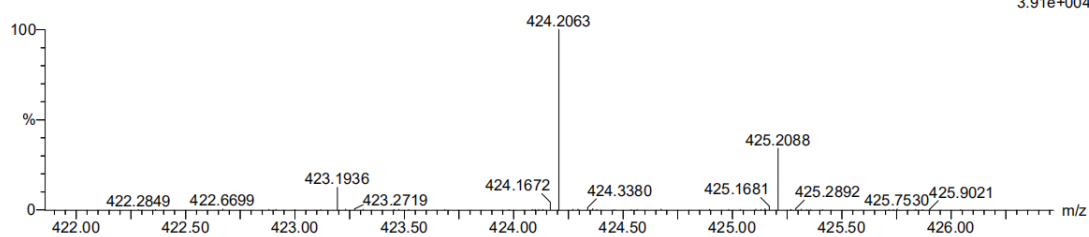

Minimum: -1.5  
Maximum: 5.0 10.0 50.0

| Mass     | Calc. Mass | mDa  | PPM  | DBE  | i-FIT | Norm | Conf (%) | Formula                           |
|----------|------------|------|------|------|-------|------|----------|-----------------------------------|
| 424.2063 | 424.2065   | -0.2 | -0.5 | 20.5 | 265.1 | n/a  | n/a      | C <sub>32</sub> H <sub>26</sub> N |

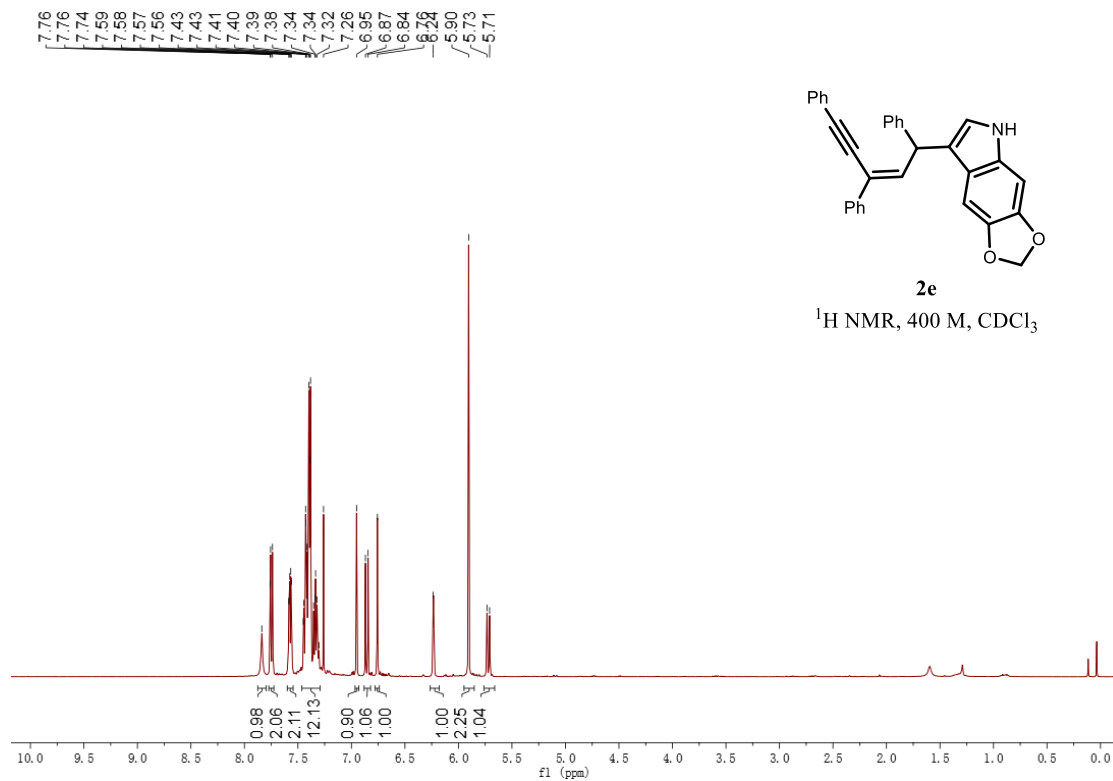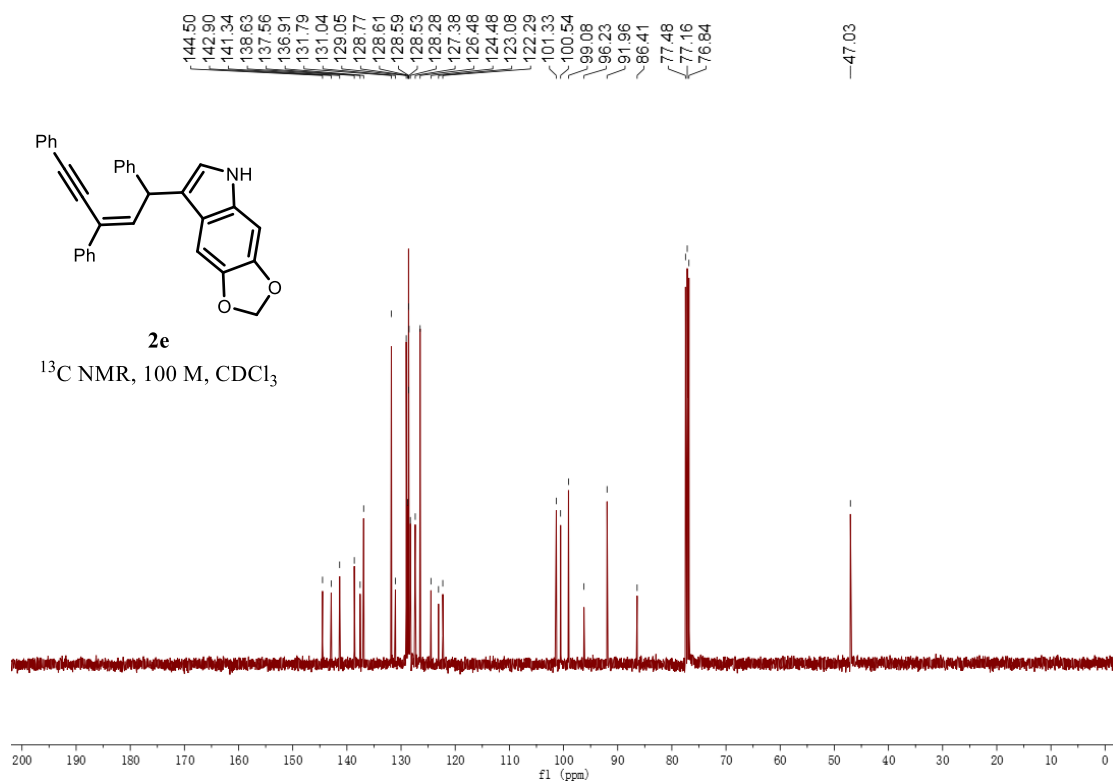

# HRMS spectrum

## Elemental Composition Report

Page 1

### Single Mass Analysis

Tolerance = 5.0 mDa / DBE: min = -1.5, max = 50.0

Element prediction: Off

Number of isotope peaks used for i-FIT = 3

Monoisotopic Mass, Even Electron Ions

1306 formula(e) evaluated with 1 results within limits (up to 50 closest results for each mass)

Elements Used:

C: 32-32 H: 24-24 N: 0-100 O: 0-100 Na: 0-2

7

250403-12-761-2-YQZ-25 14 (0.143)

1: TOF MS ES+  
8.90e+006

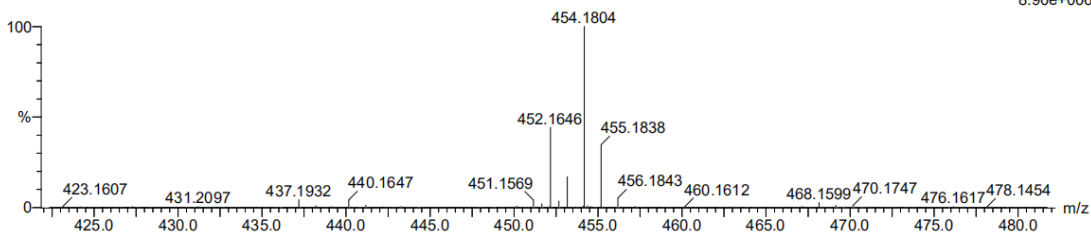

Minimum: -1.5  
Maximum: 5.0 10.0 50.0

| Mass     | Calc. Mass | mDa  | PPM  | DBE  | i-FIT  | Norm | Conf (%) | Formula      |
|----------|------------|------|------|------|--------|------|----------|--------------|
| 454.1804 | 454.1807   | -0.3 | -0.7 | 21.5 | 1197.6 | n/a  | n/a      | C32 H24 N O2 |

7.88  
7.86  
7.70  
7.69  
7.69  
7.68  
7.67  
7.61  
7.59  
7.51  
7.49  
7.48  
7.47  
7.47  
7.46  
7.45  
7.43  
7.41  
7.40  
7.38  
7.37  
7.35  
7.19  
7.08  
7.06  
6.94

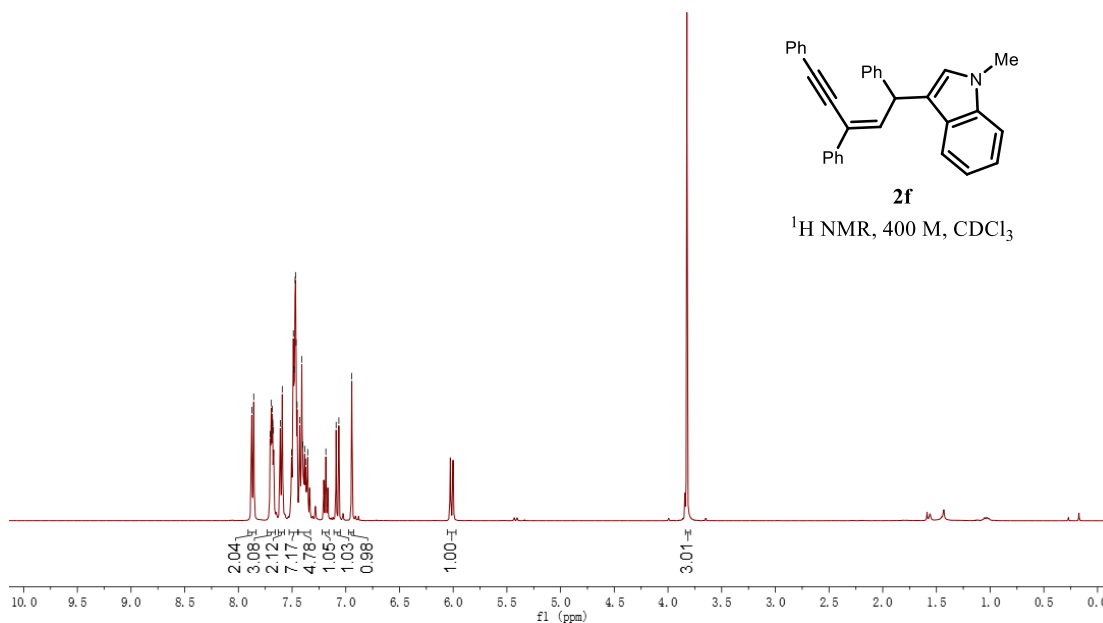

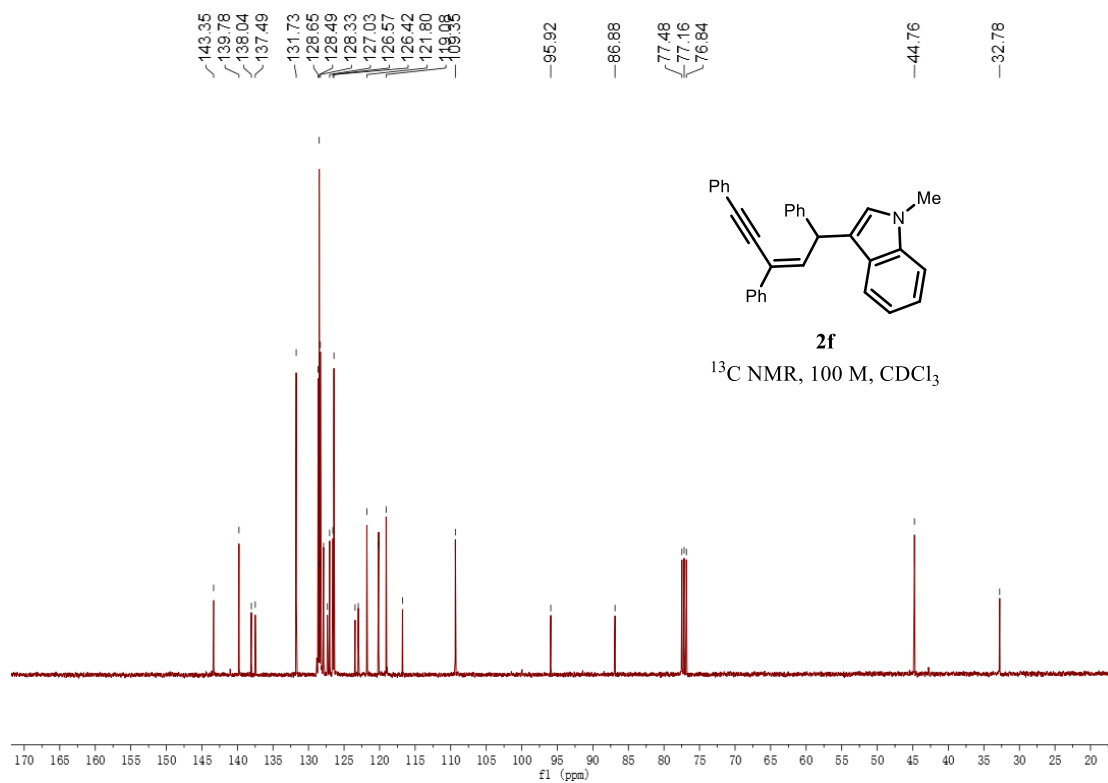

## HRMS spectrum

### Elemental Composition Report

Page 1

#### Single Mass Analysis

Tolerance = 5.0 mDa / DBE: min = -1.5, max = 50.0

Element prediction: Off

Number of isotope peaks used for i-FIT = 3

Monoisotopic Mass, Even Electron Ions

1608 formula(e) evaluated with 1 results within limits (up to 50 best isotopic matches for each mass)

Elements Used:

C: 32-32 H: 25-25 N: 0-50 O: 0-50 Na: 0-3

25

250109-11-723-2-1 20 (0.075)

1: TOF MS ES+  
2.98e+002

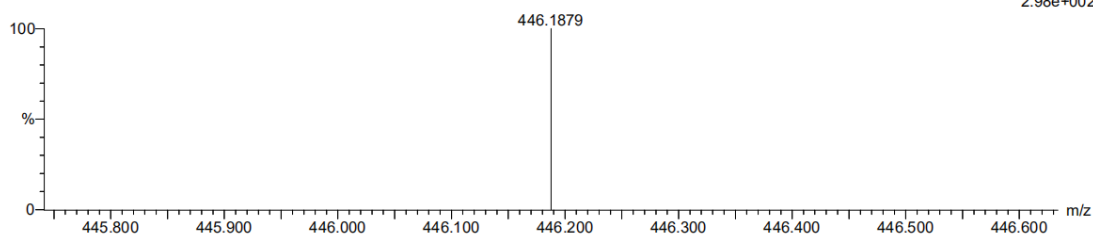

Minimum: -1.5  
Maximum: 5.0 10.0

| Mass     | Calc. Mass | mDa  | PPM  | DBE  | i-FIT | Norm | Conf (%) | Formula      |
|----------|------------|------|------|------|-------|------|----------|--------------|
| 446.1879 | 446.1885   | -0.6 | -1.3 | 20.5 | 21.3  | n/a  | n/a      | C32 H25 N Na |

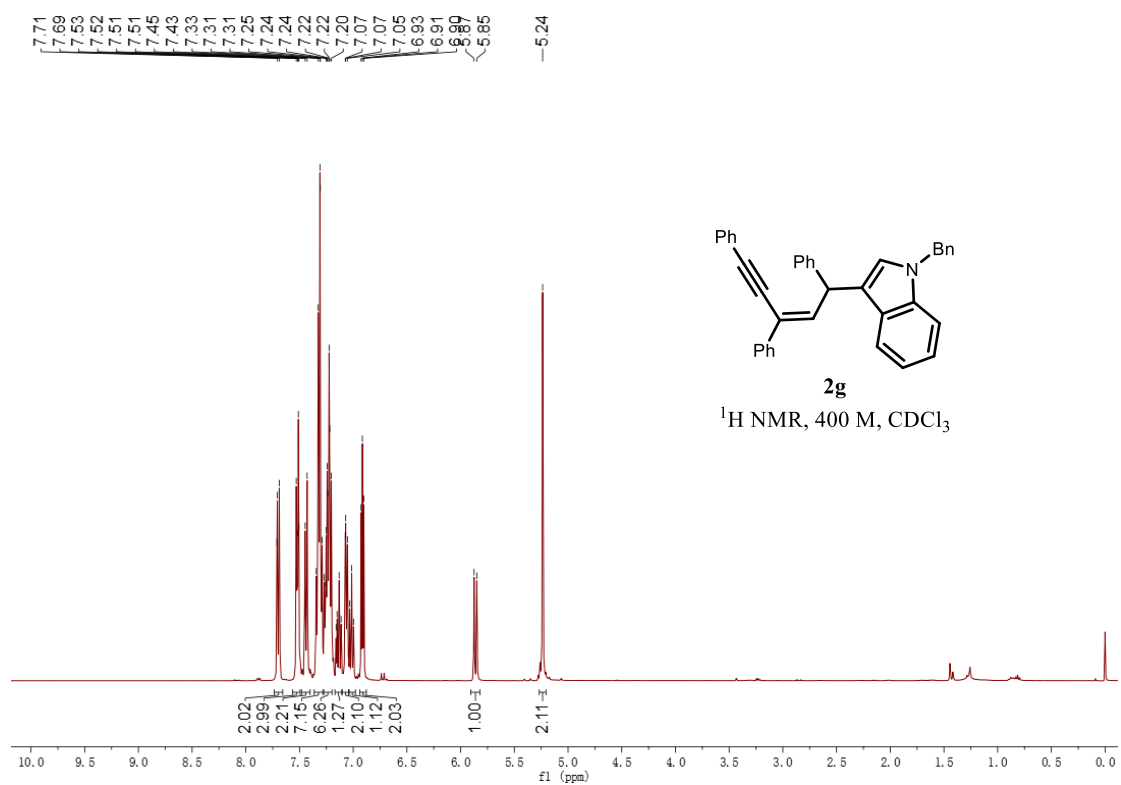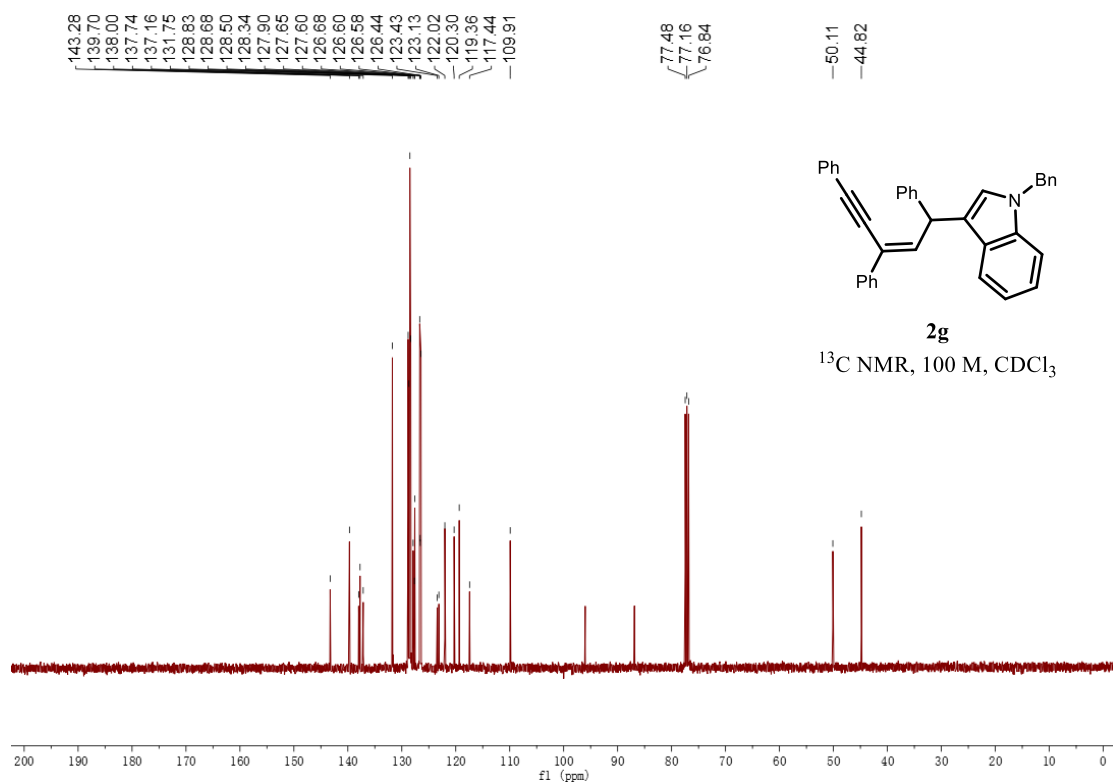

# HRMS spectrum

## Elemental Composition Report

Page 1

### Single Mass Analysis

Tolerance = 5.0 mDa / DBE: min = -1.5, max = 50.0

Element prediction: Off

Number of isotope peaks used for i-FIT = 3

Monoisotopic Mass, Even Electron Ions

2235 formula(e) evaluated with 1 results within limits (up to 50 best isotopic matches for each mass)

Elements Used:

C: 38-38 H: 29-29 N: 0-50 O: 0-50 Na: 0-3

32

250109-11-723-2-9 33 (0.100)

1: TOF MS ES+  
3.42e+003

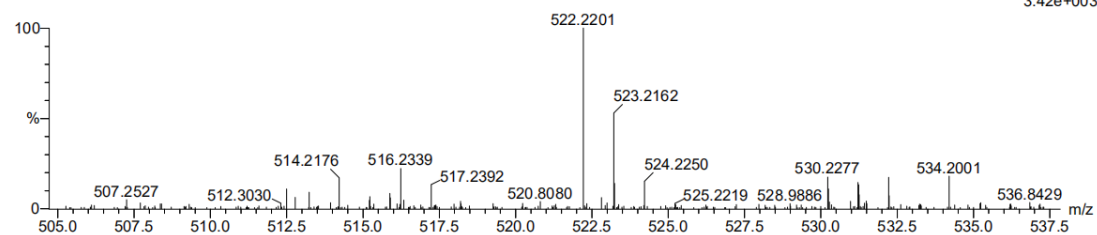

Minimum: -1.5  
Maximum: 5.0 10.0 50.0

| Mass     | Calc. Mass | mDa | PPM | DBE  | i-FIT | Norm | Conf (%) | Formula      |
|----------|------------|-----|-----|------|-------|------|----------|--------------|
| 522.2201 | 522.2198   | 0.3 | 0.6 | 24.5 | 189.7 | n/a  | n/a      | C38 H29 N Na |

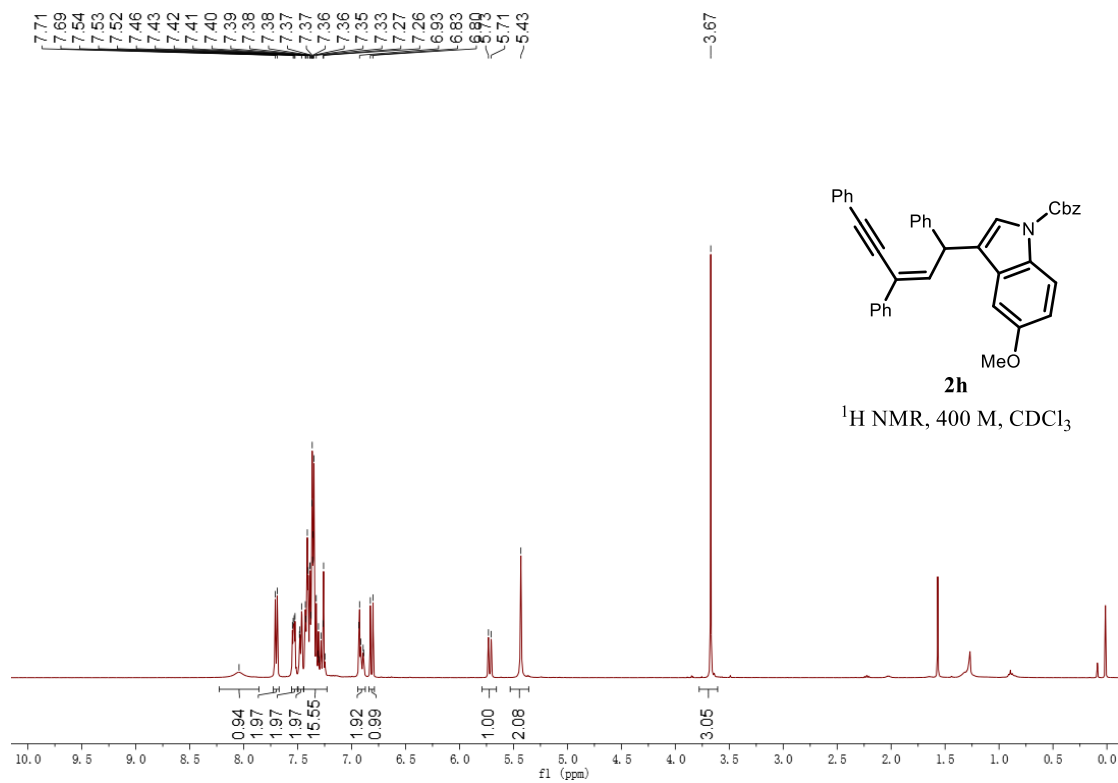

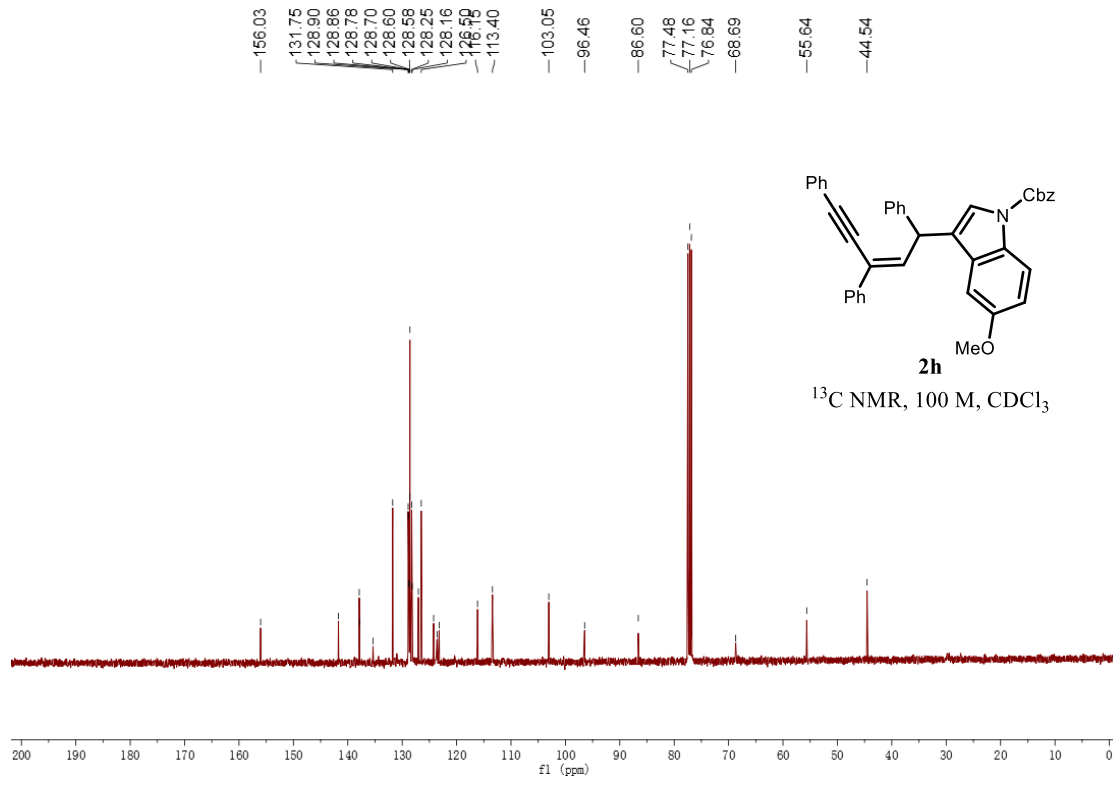

HRMS spectrum

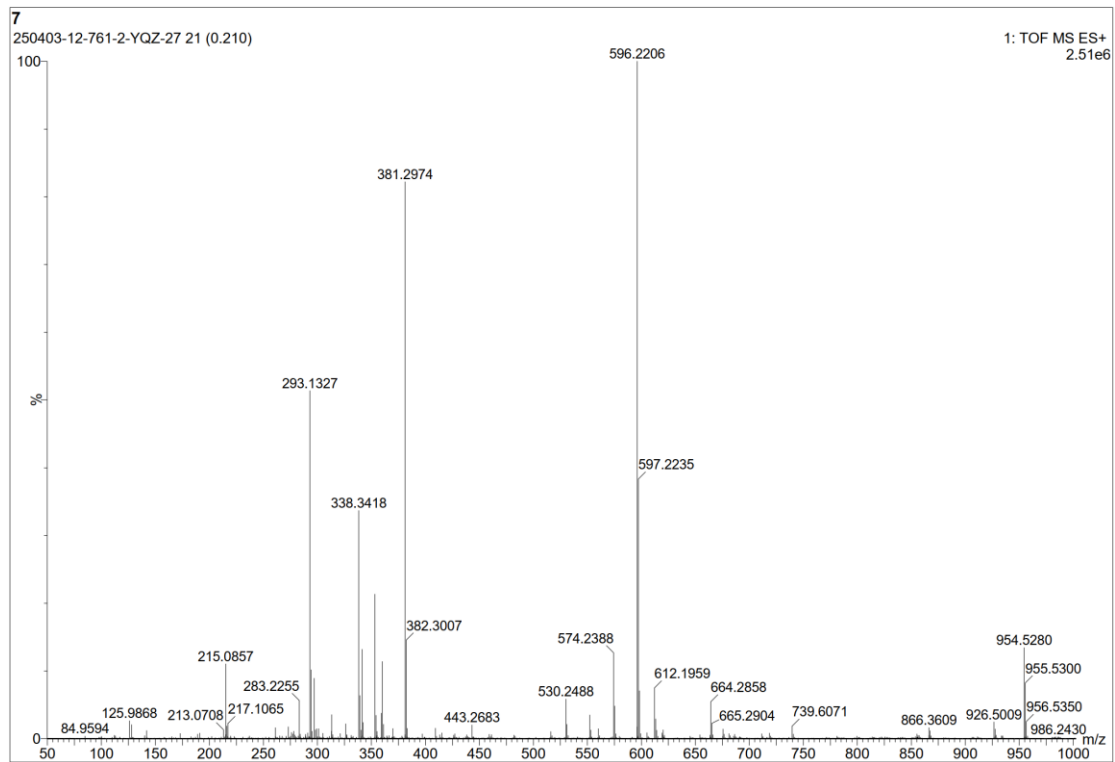

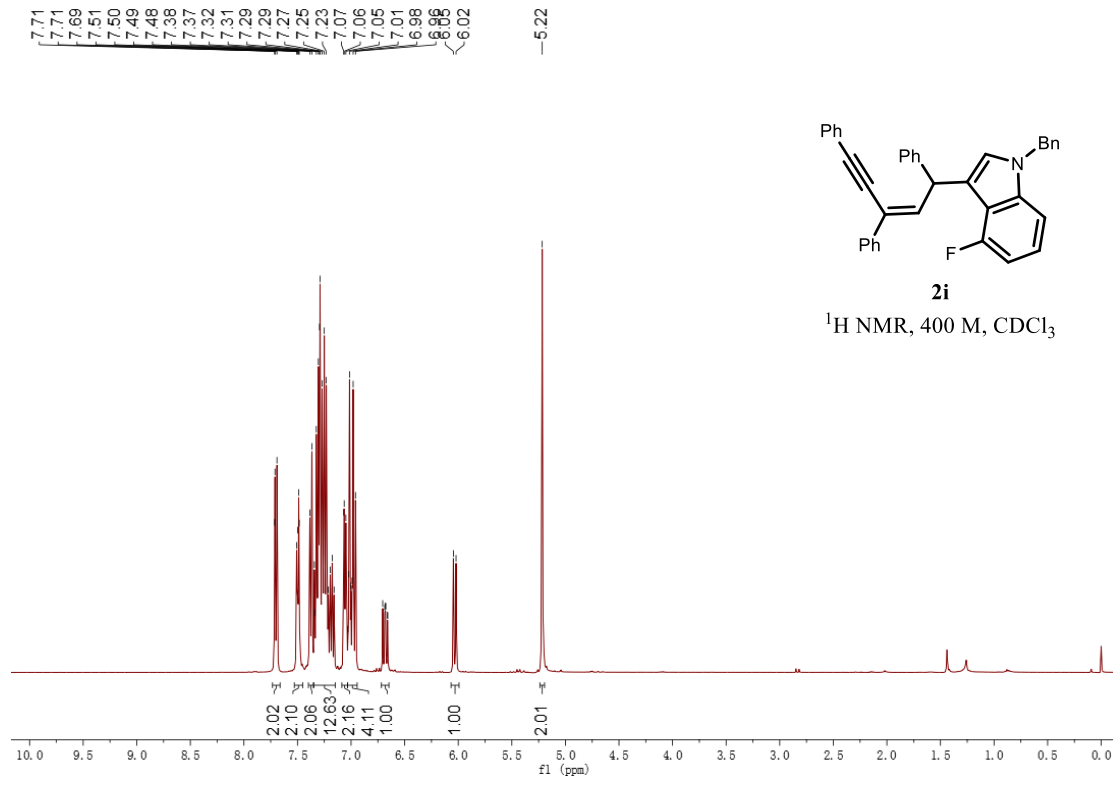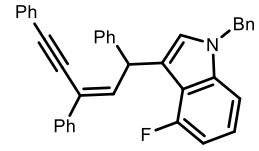

**2i**

$^1\text{H}$  NMR, 400 M,  $\text{CDCl}_3$

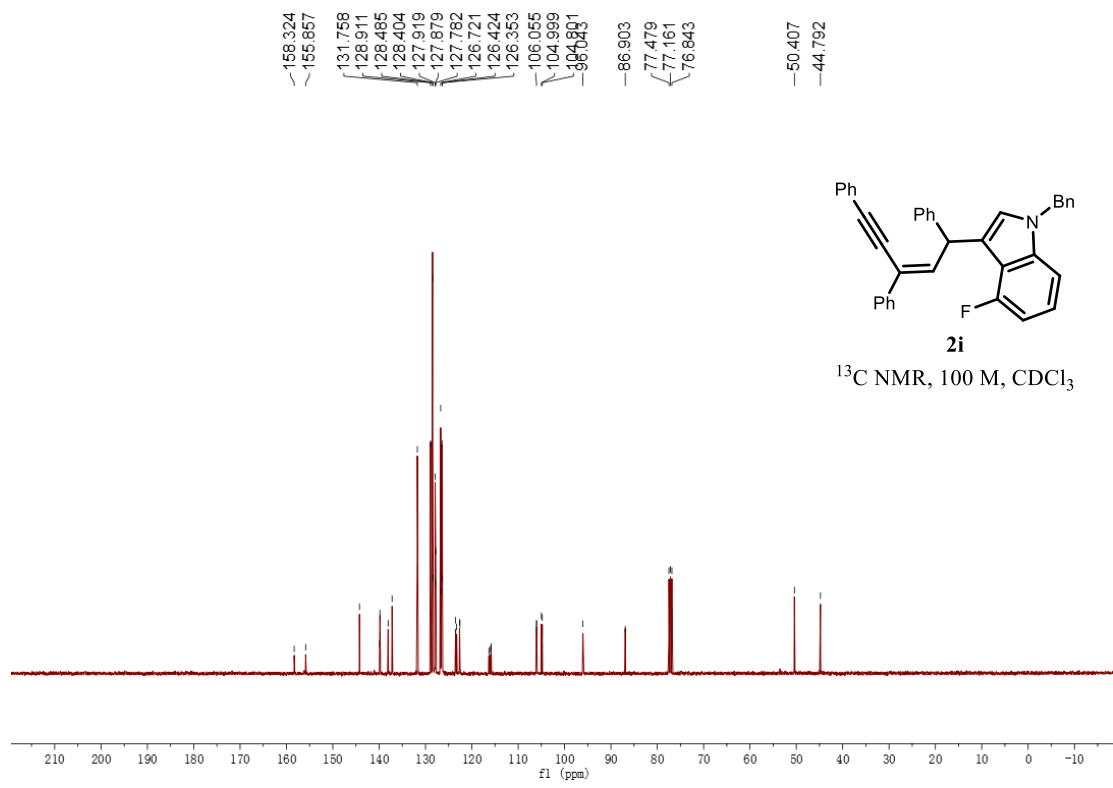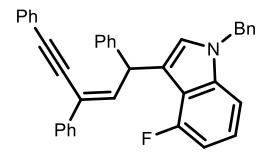

**2i**

$^{13}\text{C}$  NMR, 100 M,  $\text{CDCl}_3$

# HRMS spectrum

## Elemental Composition Report

Page 1

### Single Mass Analysis

Tolerance = 5.0 mDa / DBE: min = -1.5, max = 50.0

Element prediction: Off

Number of isotope peaks used for i-FIT = 3

Monoisotopic Mass, Even Electron Ions

2041 formula(e) evaluated with 1 results within limits (up to 50 best isotopic matches for each mass)

Elements Used:

C: 38-38 H: 28-28 N: 0-50 O: 0-50 Na: 0-3 K: 1-1 F: 1-1

32

250109-11-723-2-12 39 (0.111)

1: TOF MS ES+  
5.03e+004

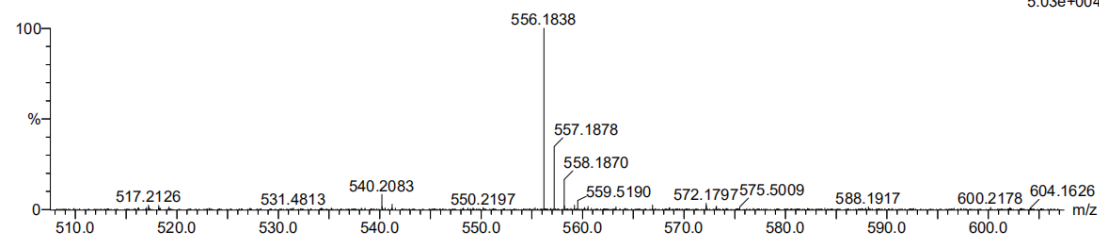

Minimum: -1.5  
Maximum: 5.0 10.0 50.0

| Mass     | Calc. Mass | mDa  | PPM  | DBE  | i-FIT | Norm | Conf (%) | Formula       |
|----------|------------|------|------|------|-------|------|----------|---------------|
| 556.1838 | 556.1843   | -0.5 | -0.9 | 24.5 | 331.6 | n/a  | n/a      | C38 H28 N K F |

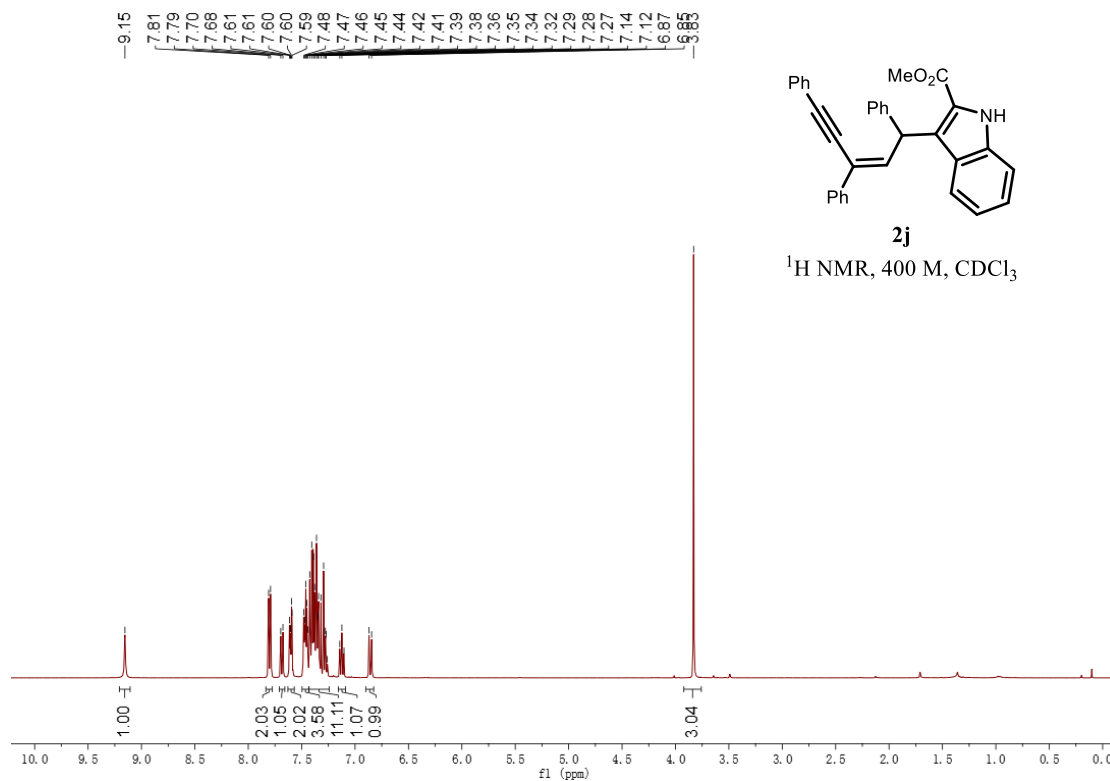

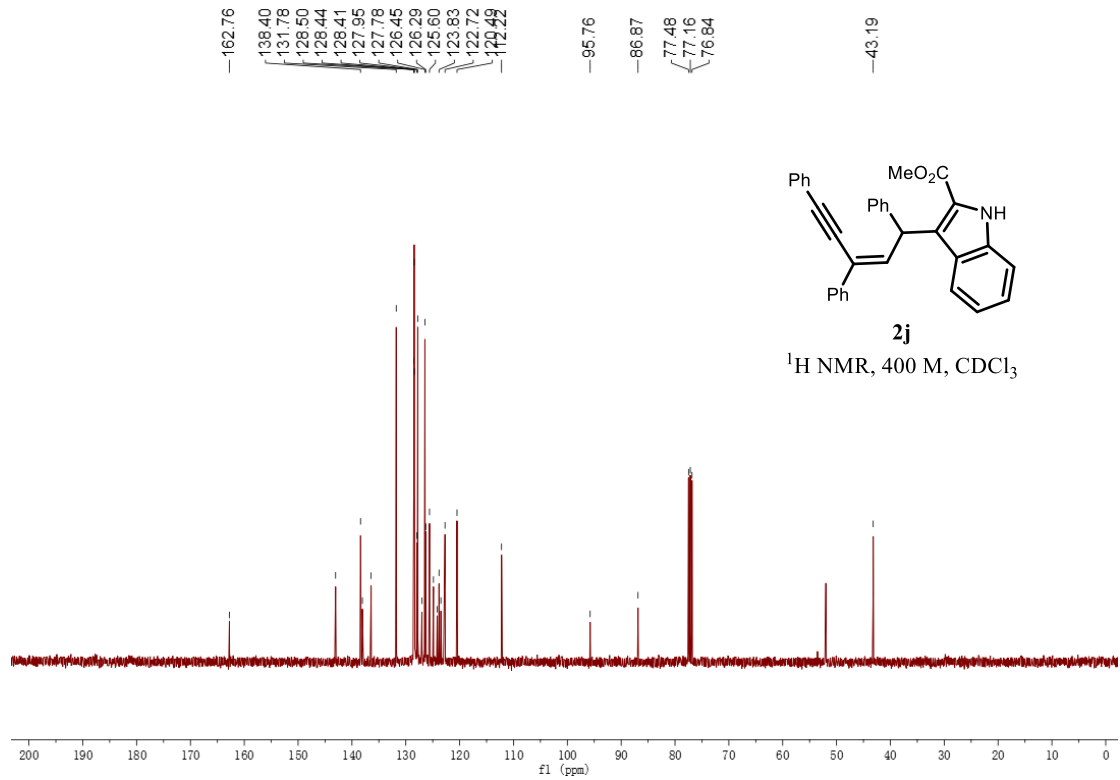

### HRMS spectrum

#### Elemental Composition Report

Page 1

#### Single Mass Analysis

Tolerance = 5.0 mDa / DBE: min = -1.5, max = 50.0

Element prediction: Off

Number of isotope peaks used for i-FIT = 3

Monoisotopic Mass, Even Electron Ions

1504 formula(e) evaluated with 1 results within limits (up to 50 closest results for each mass)

Elements Used:

C: 33-33 H: 25-25 N: 0-100 O: 0-100 Na: 0-2

7

250403-12-761-2-YQZ-24 13 (0.135)

1: TOF MS ES+  
7.66e+006

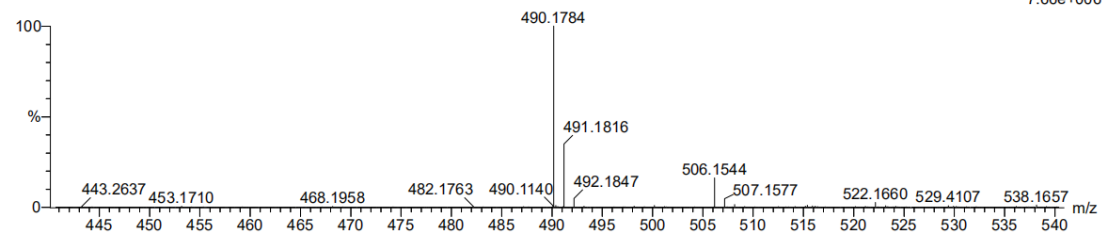

Minimum: -1.5  
 Maximum: 5.0 10.0 50.0

| Mass     | Calc. Mass | mDa | PPM | DBE  | i-FIT  | Norm | Conf (%) | Formula         |
|----------|------------|-----|-----|------|--------|------|----------|-----------------|
| 490.1784 | 490.1783   | 0.1 | 0.2 | 21.5 | 1039.2 | n/a  | n/a      | C33 H25 N O2 Na |

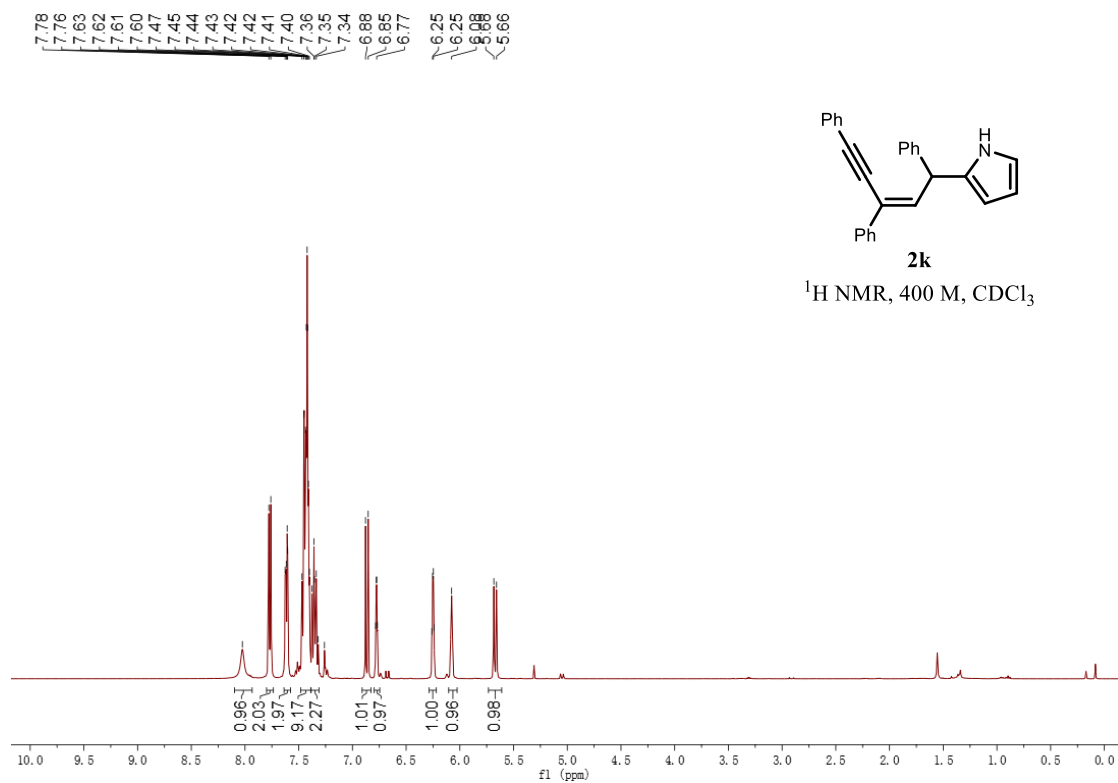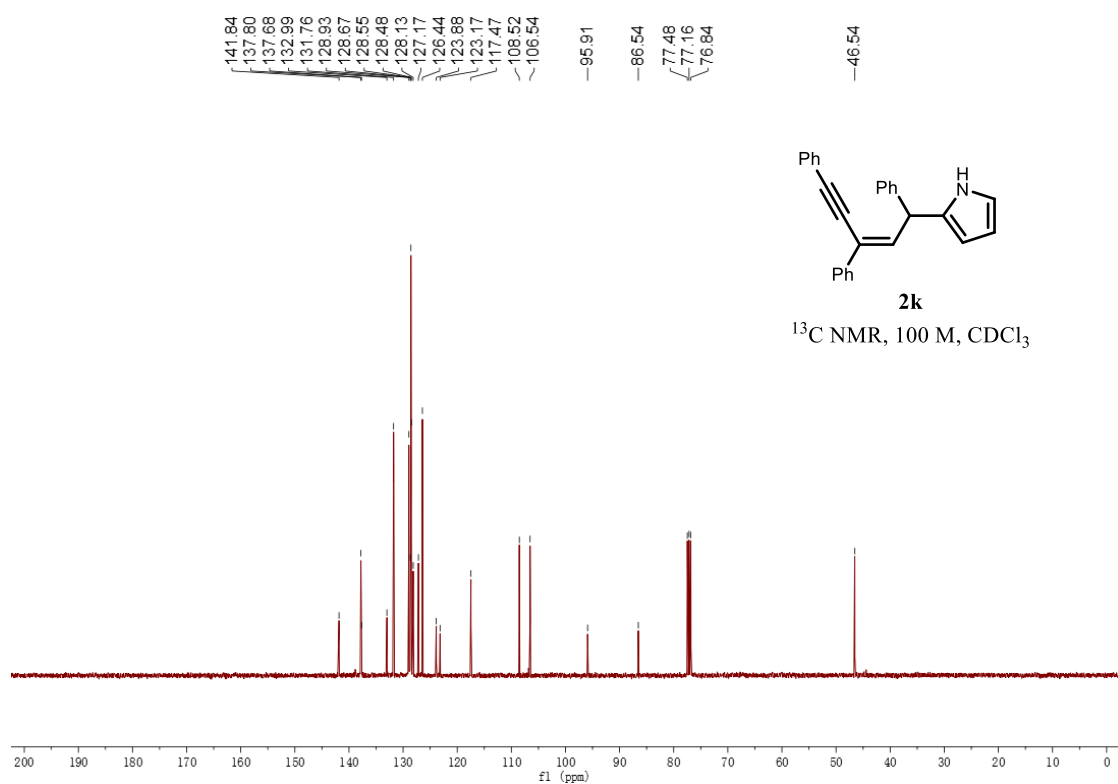

# HRMS spectrum

## Elemental Composition Report

Page 1

### Single Mass Analysis

Tolerance = 5.0 mDa / DBE: min = -1.5, max = 50.0

Element prediction: Off

Number of isotope peaks used for i-FIT = 3

Monoisotopic Mass, Even Electron Ions

1035 formula(e) evaluated with 1 results within limits (up to 50 best isotopic matches for each mass)

Elements Used:

C: 27-27 H: 22-22 N: 0-50 O: 0-50 Na: 0-3

32

250109-11-723-2-6 34 (0.101)

1: TOF MS ES+  
6.31e+004

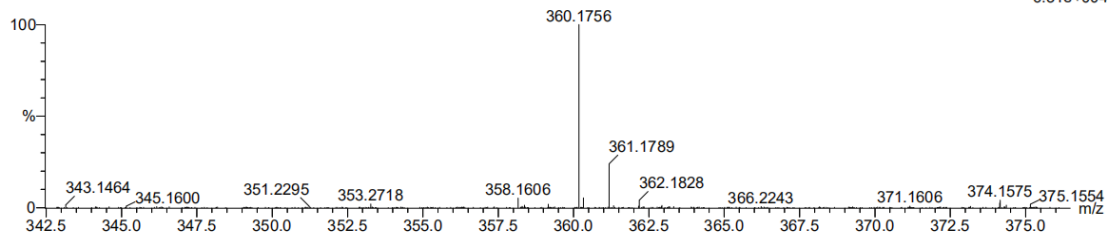

Minimum: -1.5  
Maximum: 5.0 10.0 50.0

| Mass     | Calc. Mass | mDa | PPM | DBE  | i-FIT | Norm | Conf (%) | Formula   |
|----------|------------|-----|-----|------|-------|------|----------|-----------|
| 360.1756 | 360.1752   | 0.4 | 1.1 | 17.5 | 298.0 | n/a  | n/a      | C27 H22 N |

7.71  
7.70  
7.69  
7.53  
7.52  
7.51  
7.45  
7.43  
7.41  
7.38  
7.37  
7.37  
7.35  
7.34  
7.28  
6.83  
6.81

-5.97  
5.62  
5.60

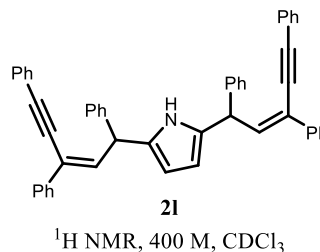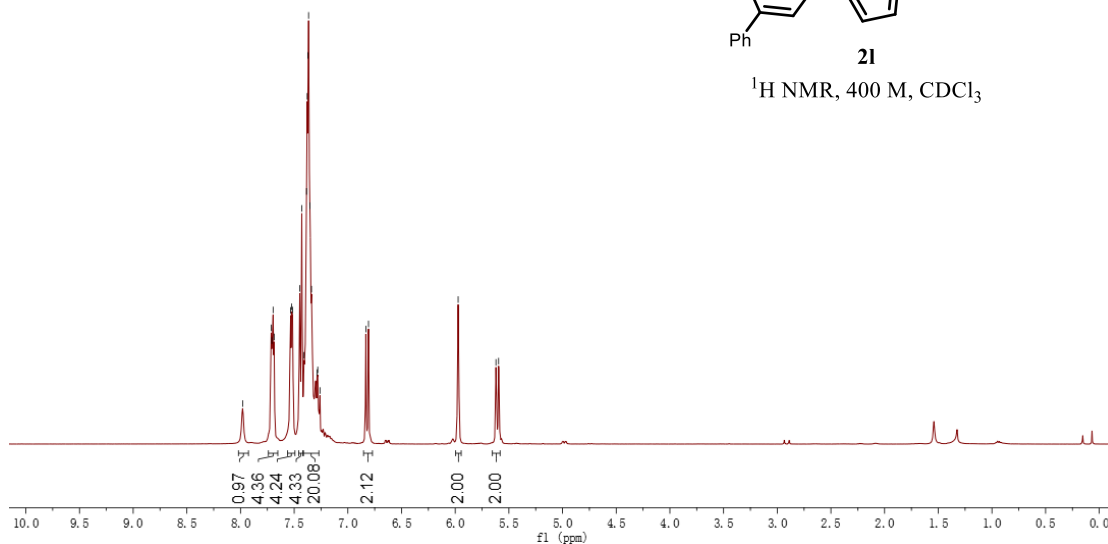

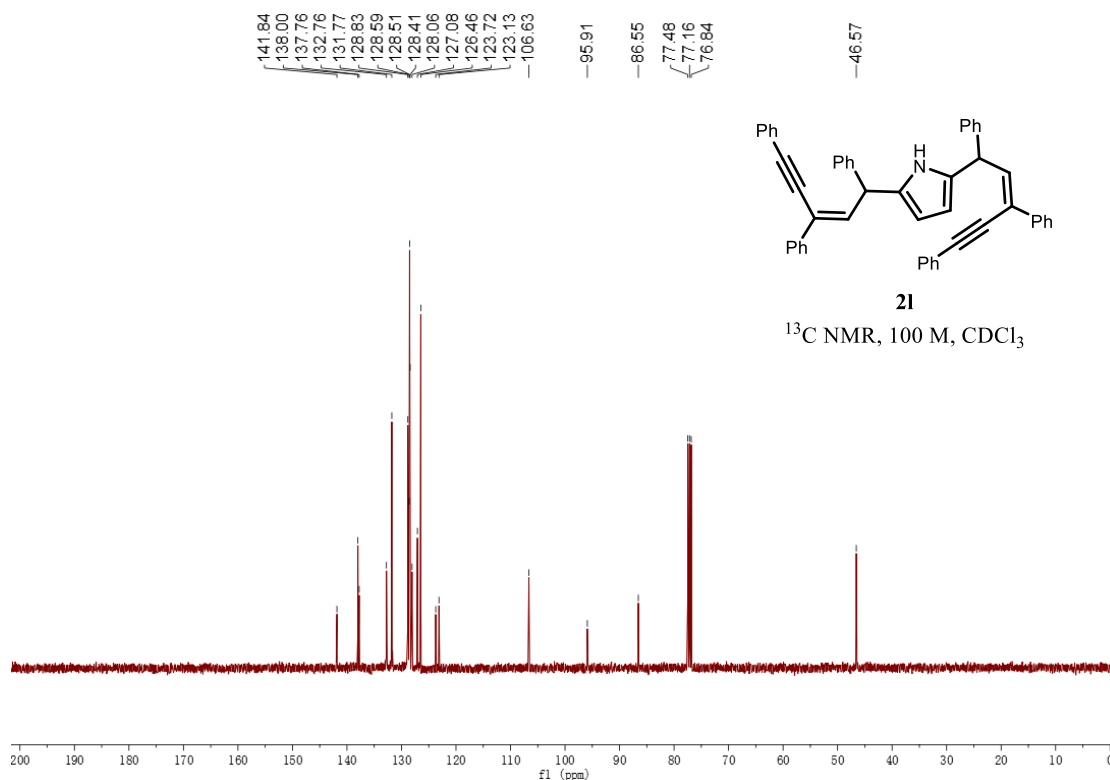

## HRMS spectrum

### Elemental Composition Report

Page 1

#### Single Mass Analysis

Tolerance = 5.0 mDa / DBE: min = -1.5, max = 50.0

Element prediction: Off

Number of isotope peaks used for i-FIT = 3

Monoisotopic Mass, Even Electron Ions

3565 formula(e) evaluated with 1 results within limits (up to 50 best isotopic matches for each mass)

Elements Used:

C: 50-50 H: 38-38 N: 0-50 O: 0-50 Na: 0-3

32

250109-11-723-2-5 36 (0.105)

1: TOF MS ES+  
1.64e+005

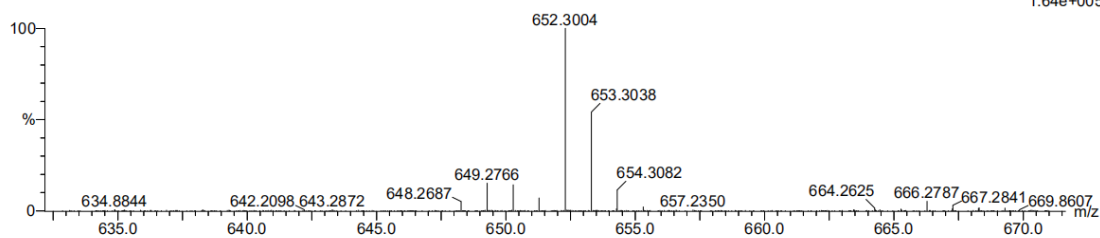

Minimum: -1.5  
Maximum: 5.0 10.0 50.0

| Mass     | Calc. Mass | mDa | PPM | DBE  | i-FIT | Norm | Conf (%) | Formula                           |
|----------|------------|-----|-----|------|-------|------|----------|-----------------------------------|
| 652.3004 | 652.3004   | 0.0 | 0.0 | 32.5 | 421.0 | n/a  | n/a      | C <sub>50</sub> H <sub>38</sub> N |

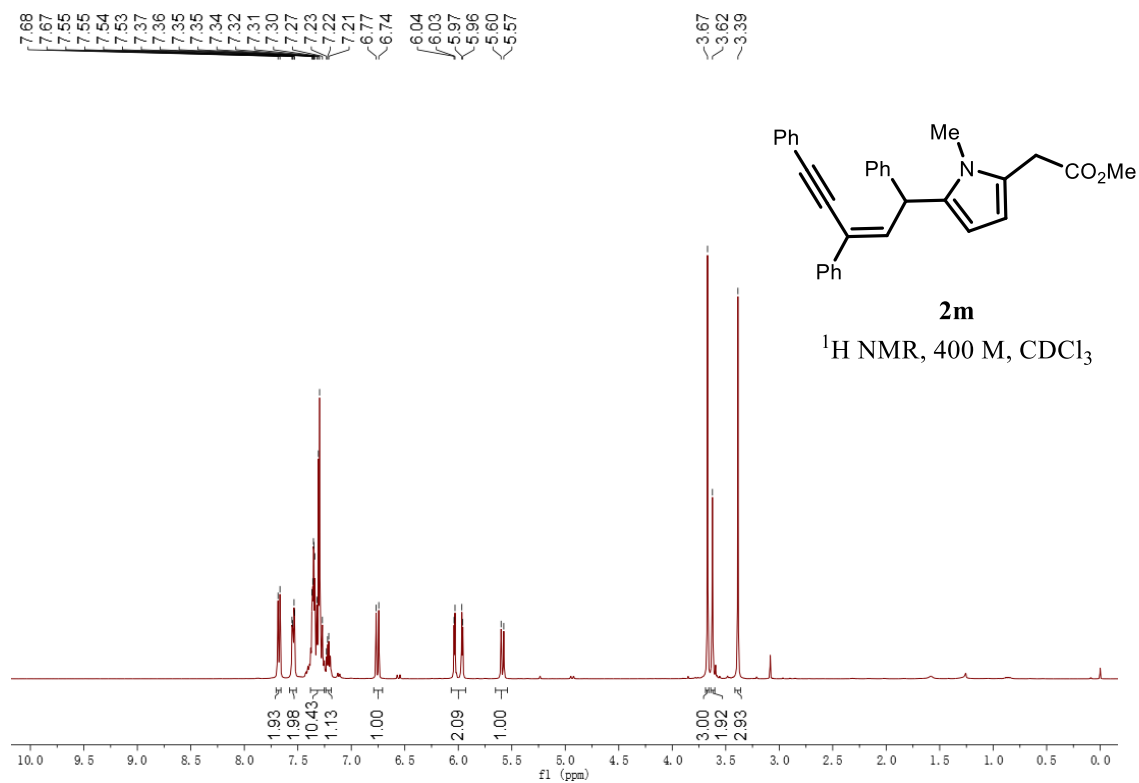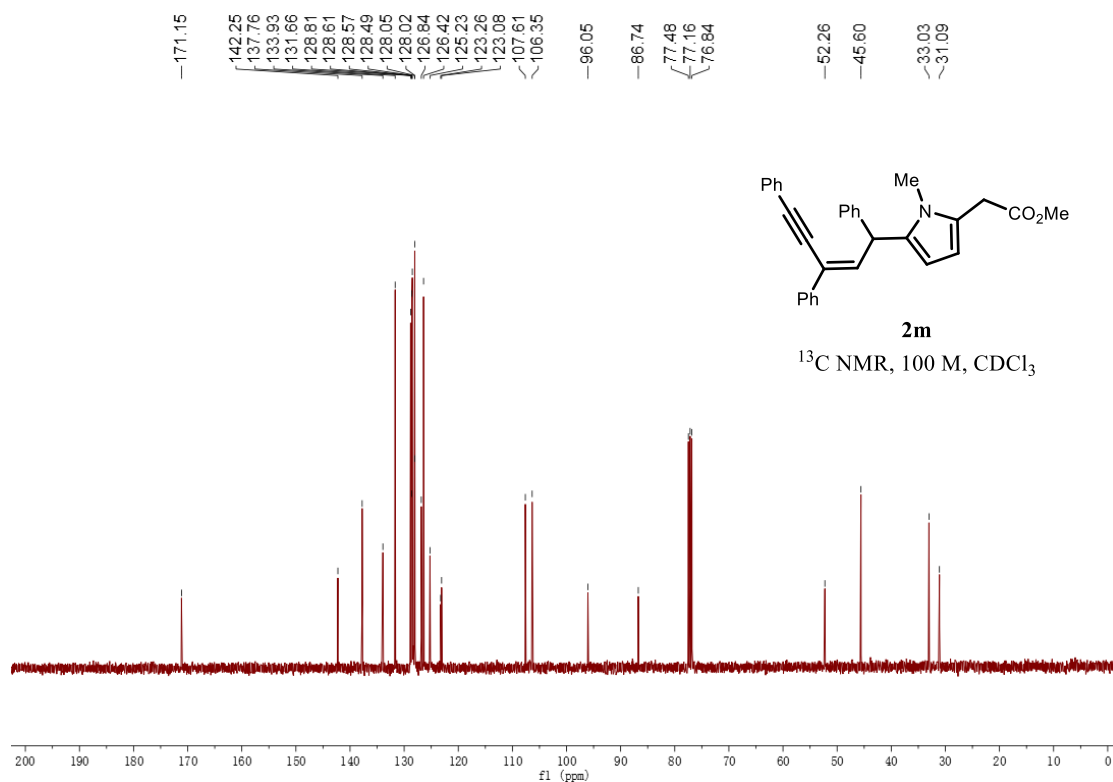

# HRMS spectrum

## Elemental Composition Report

Page 1

### Single Mass Analysis

Tolerance = 5.0 mDa / DBE: min = -1.5, max = 50.0

Element prediction: Off

Number of isotope peaks used for i-FIT = 3

Monoisotopic Mass, Even Electron Ions

1596 formula(e) evaluated with 1 results within limits (up to 50 best isotopic matches for each mass)

Elements Used:

C: 31-31 H: 28-28 N: 0-50 O: 0-50 Na: 0-3

32

250109-11-723-2-7 36 (0.105)

1: TOF MS ES+  
7.18e+00e

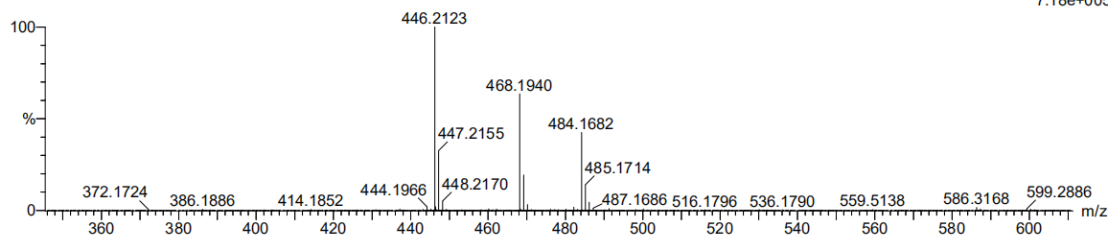

Minimum: -1.5  
Maximum: 5.0 10.0 50.0

| Mass     | Calc. Mass | mDa | PPM | DBE  | i-FIT | Norm | Conf (%) | Formula      |
|----------|------------|-----|-----|------|-------|------|----------|--------------|
| 446.2123 | 446.2120   | 0.3 | 0.7 | 18.5 | 642.9 | n/a  | n/a      | C31 H28 N O2 |

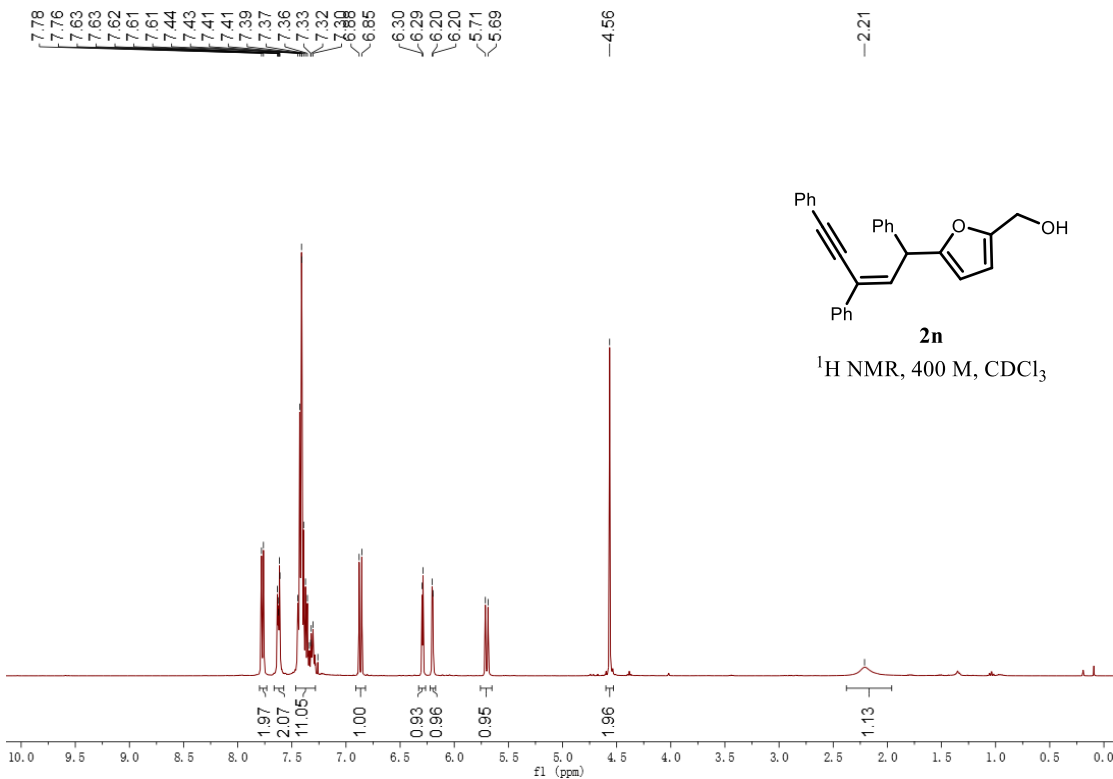

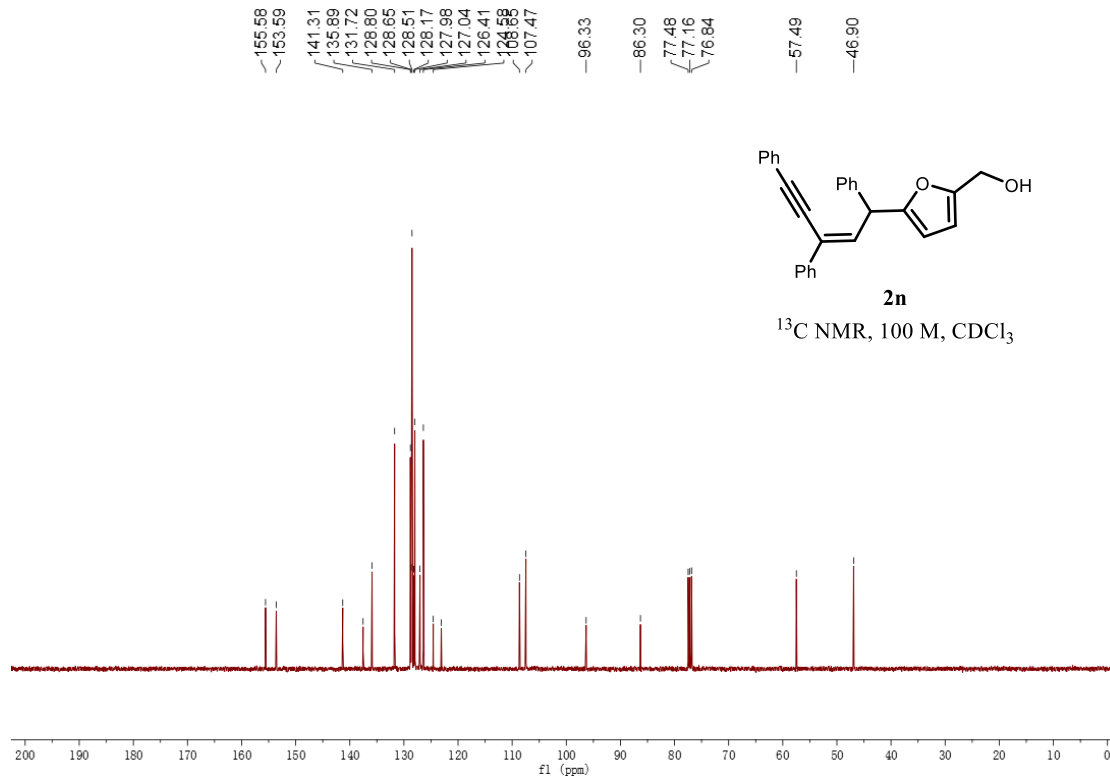

### HRMS spectrum

#### Elemental Composition Report

Page 1

#### Single Mass Analysis

Tolerance = 5.0 mDa / DBE: min = -1.5, max = 50.0

Element prediction: Off

Number of isotope peaks used for i-FIT = 3

Monoisotopic Mass, Even Electron Ions

1350 formula(e) evaluated with 1 results within limits (up to 50 best isotopic matches for each mass)

Elements Used:

C: 28-28 H: 22-22 N: 0-50 O: 0-50 Na: 0-3

25

250109-11-723-2-2 25 (0.084)

1: TOF MS ES+  
1.48e+005

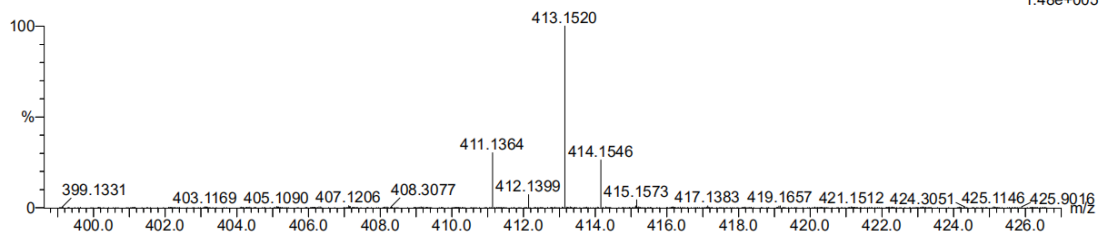

Minimum: -1.5  
Maximum: 50.0

| Mass     | Calc. Mass | mDa | PPM | DBE  | i-FIT | Norm | Conf(%) | Formula                                           |
|----------|------------|-----|-----|------|-------|------|---------|---------------------------------------------------|
| 413.1520 | 413.1517   | 0.3 | 0.7 | 17.5 | 482.7 | n/a  | n/a     | C <sub>28</sub> H <sub>22</sub> O <sub>2</sub> Na |

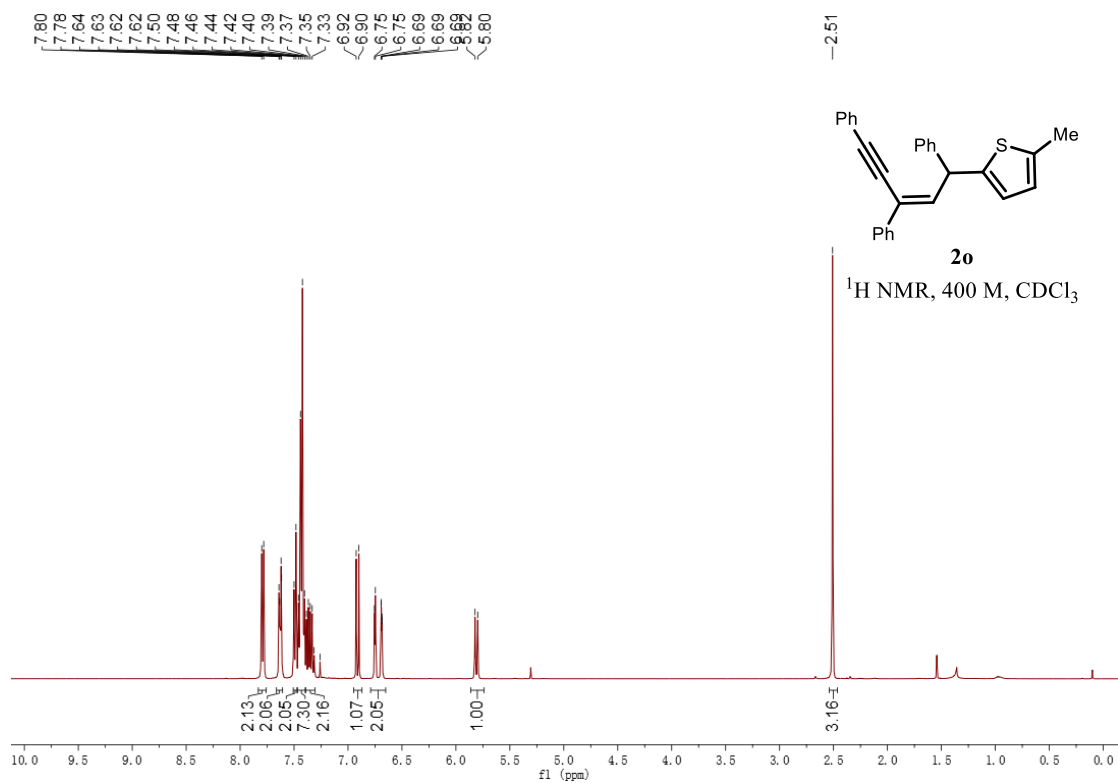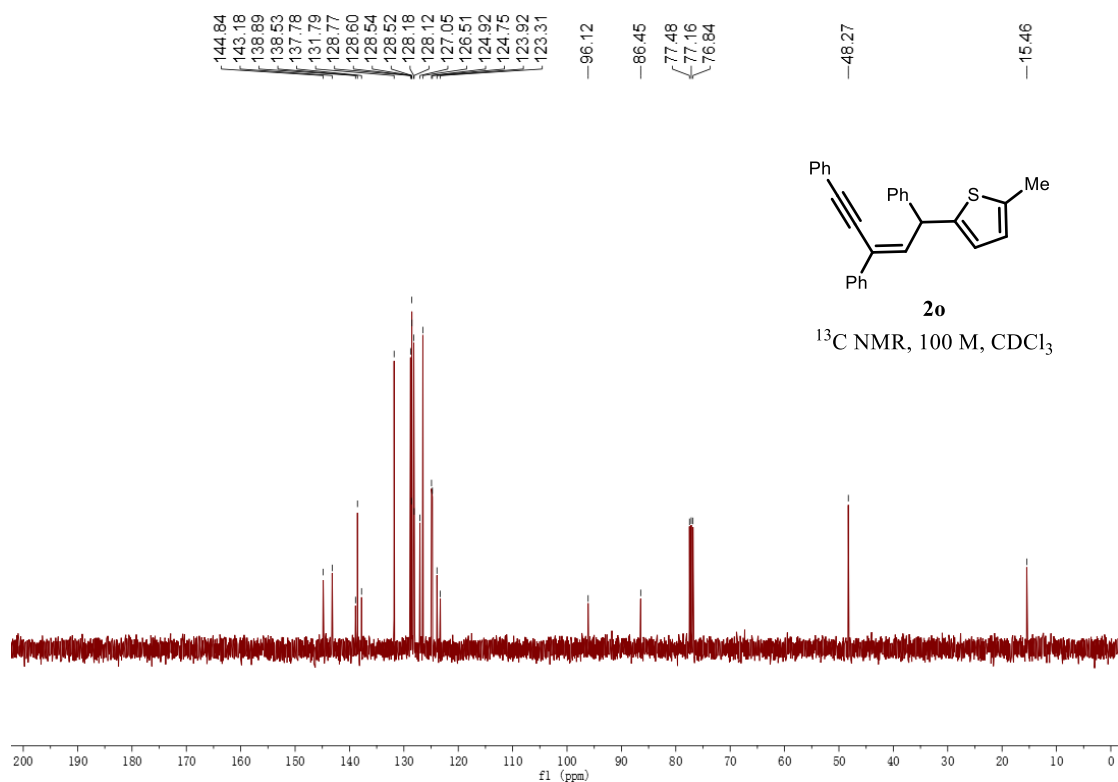

# HRMS spectrum

## Elemental Composition Report

Page 1

### Single Mass Analysis

Tolerance = 5.0 mDa / DBE: min = -1.5, max = 50.0

Element prediction: Off

Number of isotope peaks used for i-FIT = 3

Monoisotopic Mass, Even Electron Ions

2933 formula(e) evaluated with 1 results within limits (up to 50 best isotopic matches for each mass)

Elements Used:

C: 28-28 H: 22-22 N: 0-50 O: 0-50 Na: 0-3 S: 1-3

32

250109-11-723-2-3 54 (0.140)

1: TOF MS ES+  
1.71e+002

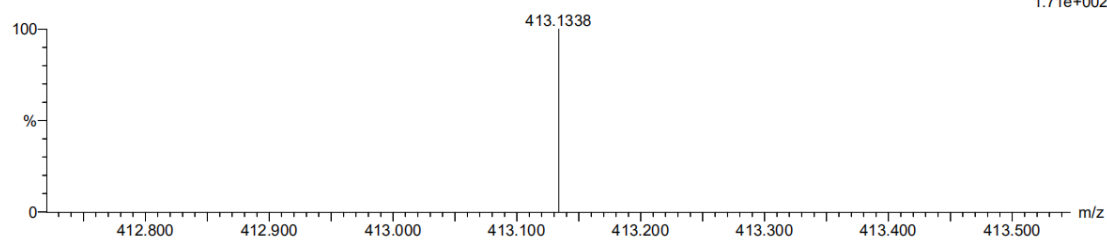

Minimum: -1.5  
Maximum: 5.0 10.0 50.0

| Mass     | Calc. Mass | mDa  | PPM  | DBE  | i-FIT | Norm | Conf (%) | Formula      |
|----------|------------|------|------|------|-------|------|----------|--------------|
| 413.1338 | 413.1340   | -0.2 | -0.5 | 17.5 | 19.6  | n/a  | n/a      | C28 H22 Na S |

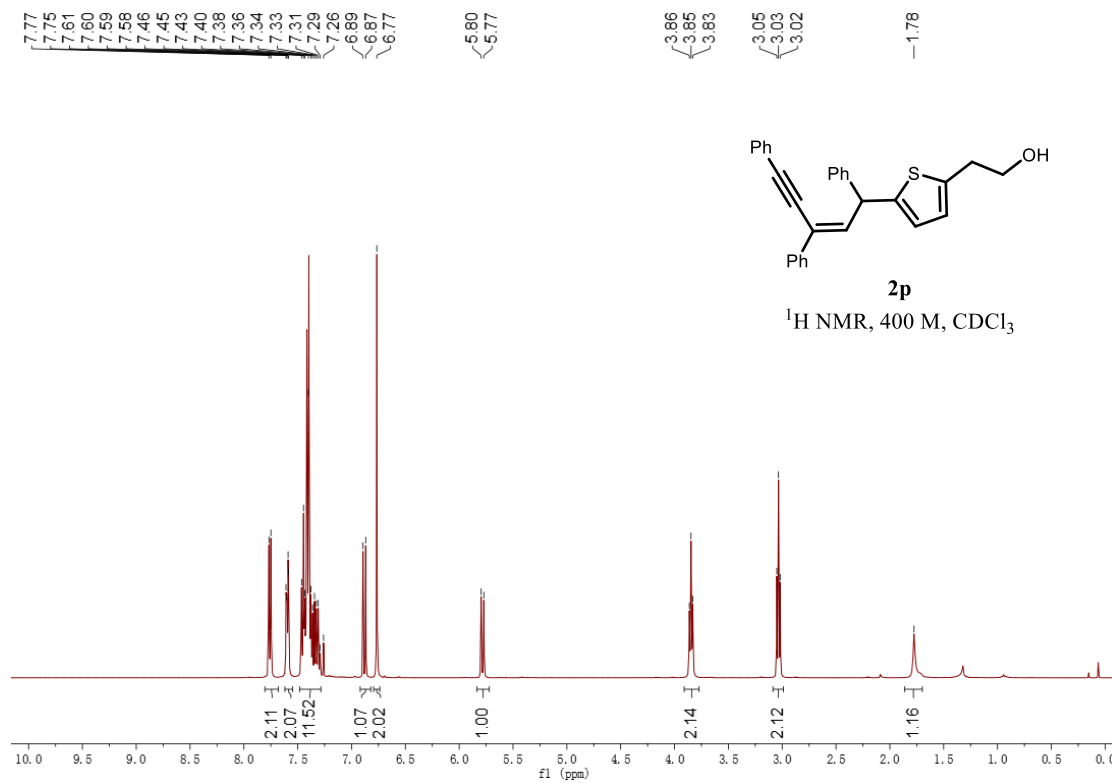

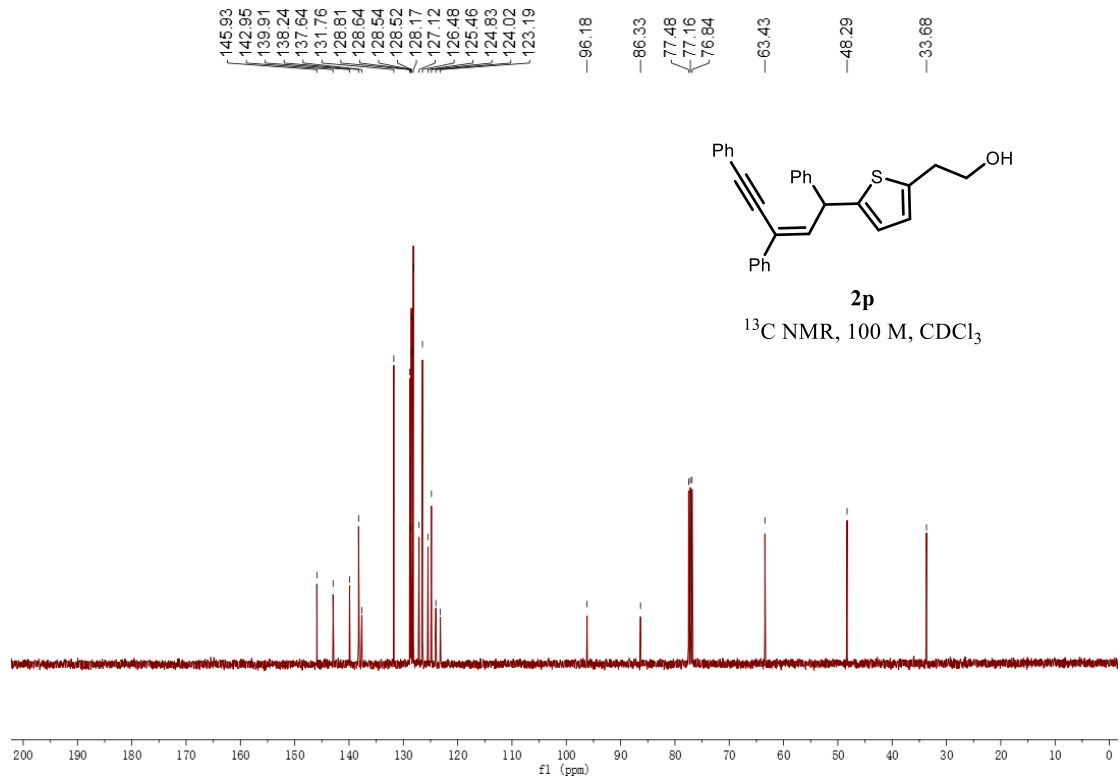

## HRMS spectrum

### Elemental Composition Report

Page 1

#### Single Mass Analysis

Tolerance = 5.0 mDa / DBE: min = -1.5, max = 50.0

Element prediction: Off

Number of isotope peaks used for i-FIT = 3

Monoisotopic Mass, Even Electron Ions

4255 formula(e) evaluated with 1 results within limits (up to 50 best isotopic matches for each mass)

Elements Used:

C: 29-29 H: 24-24 N: 0-50 O: 0-50 Na: 0-3 S: 1-4

12

250115-20-728-3-YQZ-13 30 (0.082)

1: TOF MS ES+  
3.30e+005

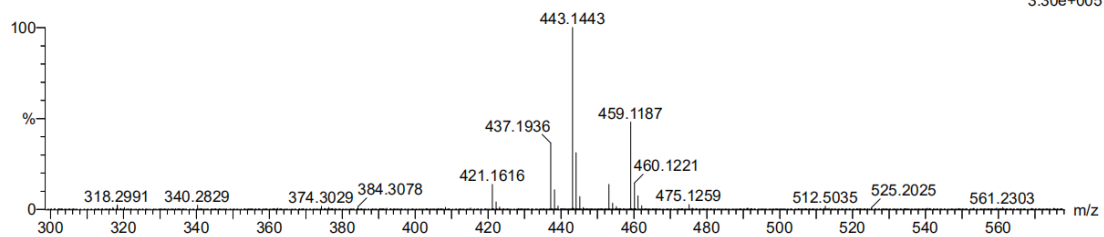

Minimum: -1.5  
Maximum: 50.0

| Mass     | Calc. Mass | mDa  | PPM  | DBE  | i-FIT | Norm | Conf (%) | Formula                                |
|----------|------------|------|------|------|-------|------|----------|----------------------------------------|
| 443.1443 | 443.1446   | -0.3 | -0.7 | 17.5 | 545.7 | n/a  | n/a      | C <sub>29</sub> H <sub>24</sub> O Na S |

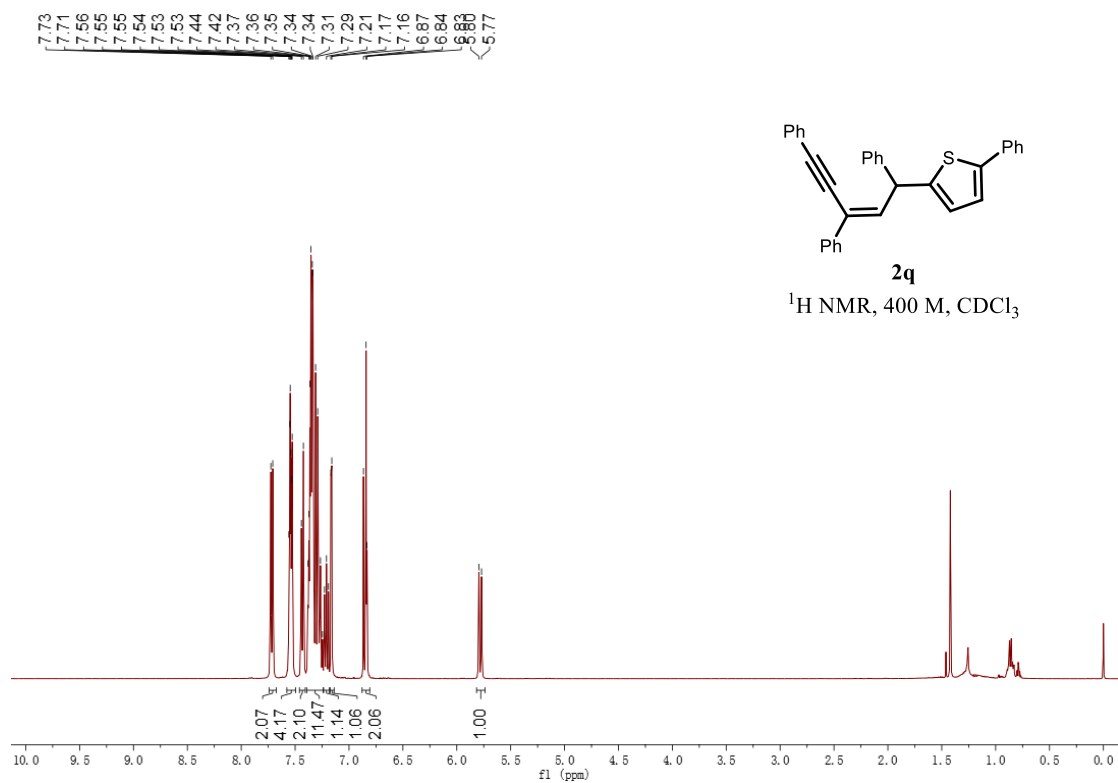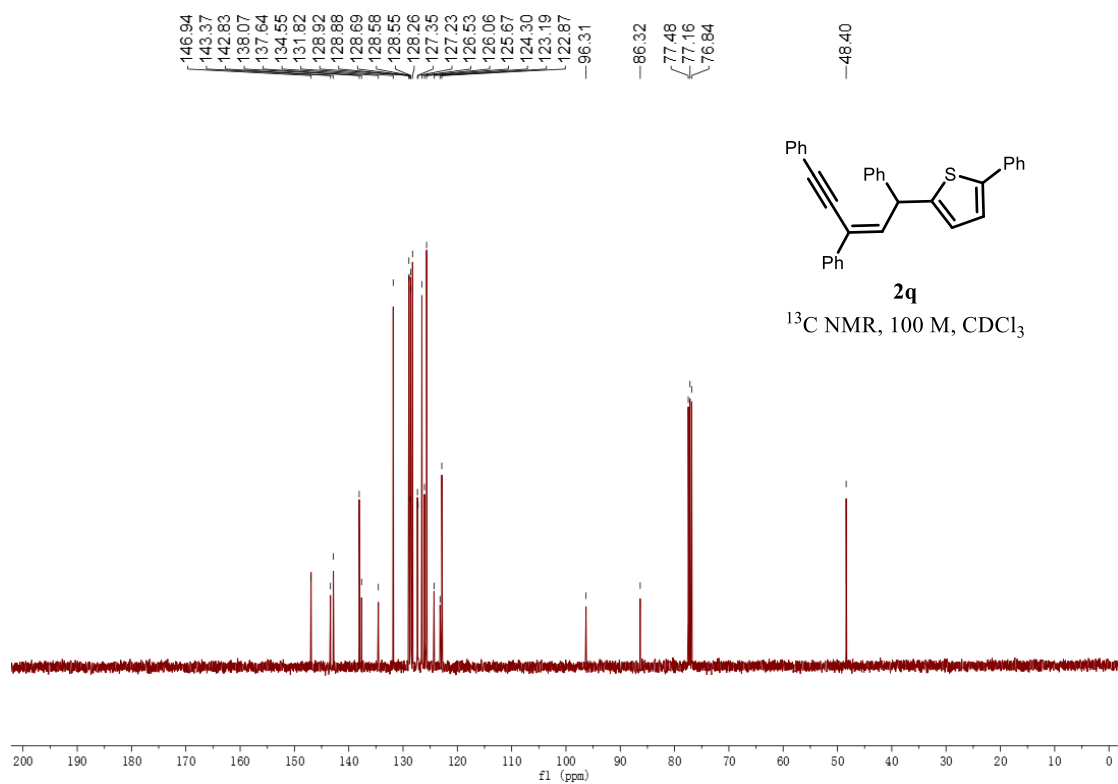

# HRMS spectrum

## Elemental Composition Report

Page 1

### Single Mass Analysis

Tolerance = 5.0 mDa / DBE: min = -1.5, max = 50.0

Element prediction: Off

Number of isotope peaks used for i-FIT = 3

Monoisotopic Mass, Even Electron Ions

2117 formula(e) evaluated with 1 results within limits (up to 50 closest results for each mass)

Elements Used:

C: 33-33 H: 25-25 N: 0-100 O: 0-100 Na: 0-2 S: 1-2

7

250403-12-761-2-YQZ-17 8 (0.092)

1: TOF MS ES+  
8.16e+005

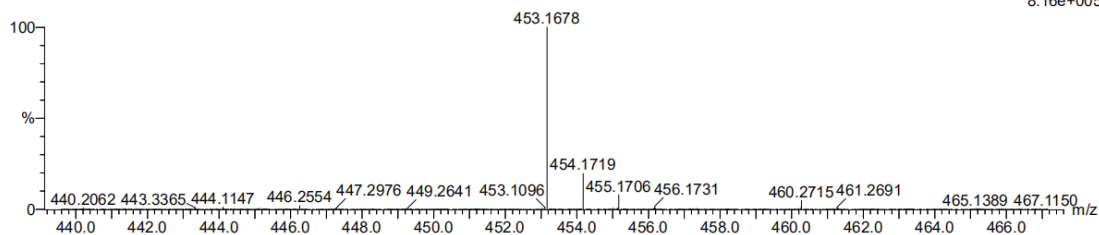

Minimum: -1.5  
Maximum: 5.0 10.0 50.0

| Mass     | Calc. Mass | mDa | PPM | DBE  | i-FIT | Norm | Conf(%) | Formula   |
|----------|------------|-----|-----|------|-------|------|---------|-----------|
| 453.1678 | 453.1677   | 0.1 | 0.2 | 21.5 | 934.0 | n/a  | n/a     | C33 H25 S |

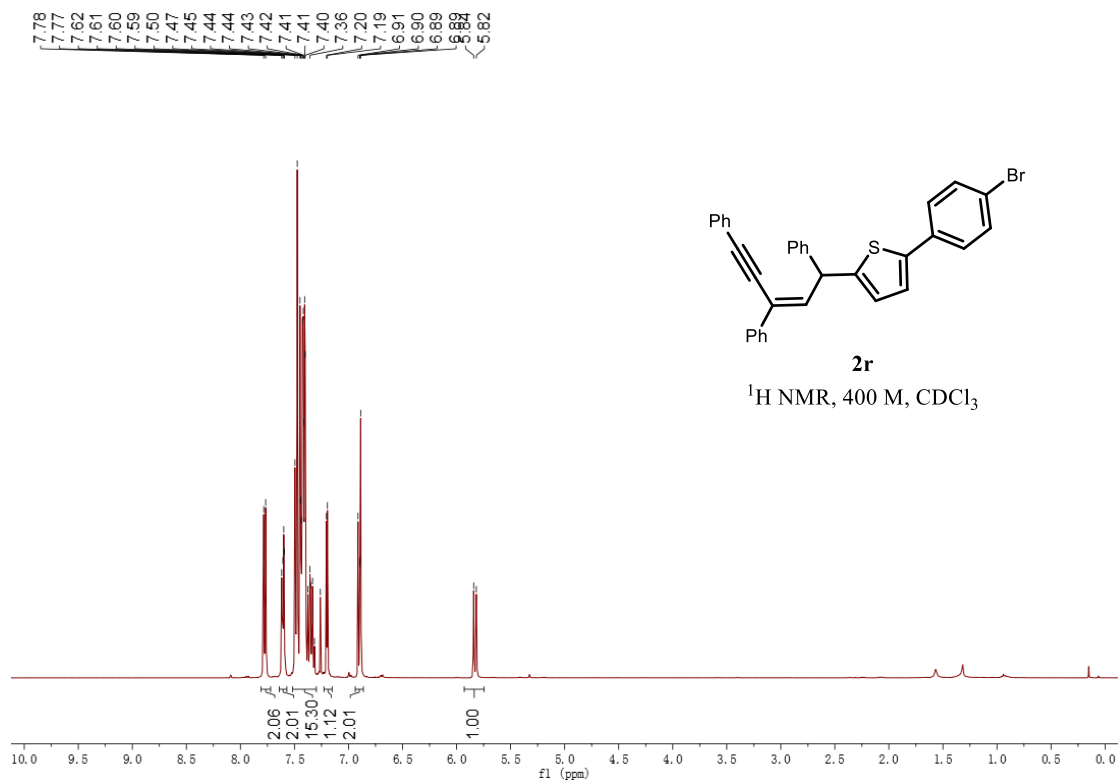

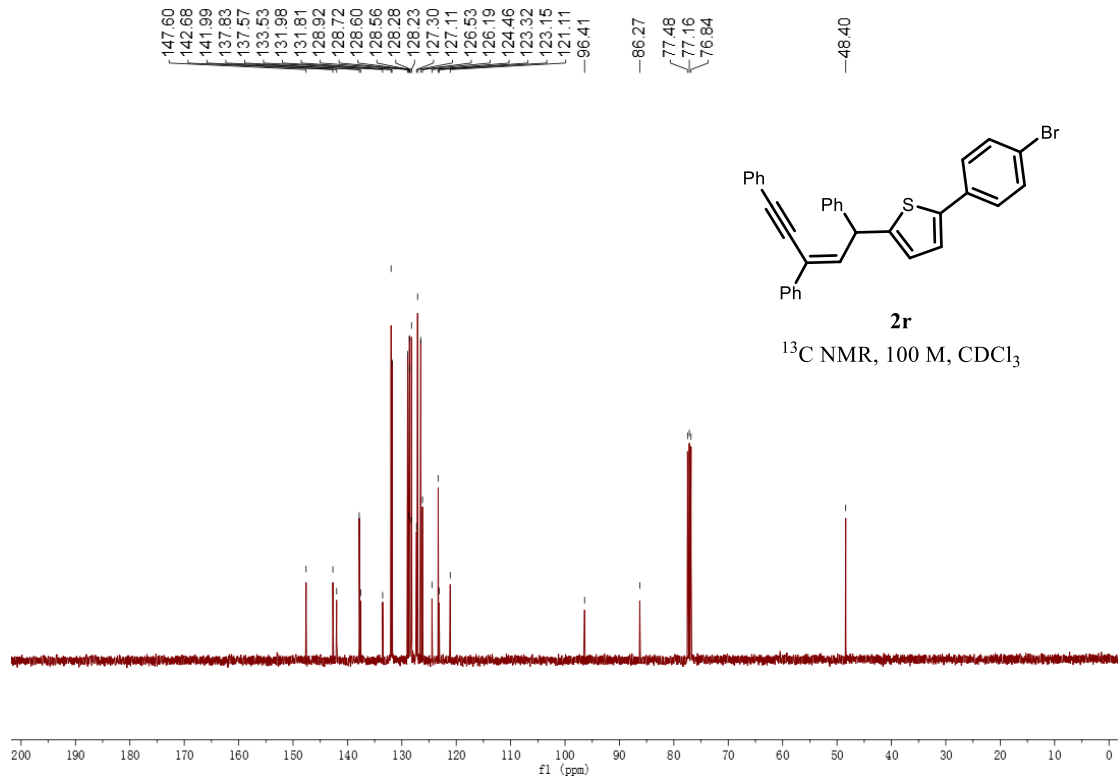

## HRMS spectrum

### Elemental Composition Report

Page 1

#### Single Mass Analysis

Tolerance = 5.0 mDa / DBE: min = -1.5, max = 50.0

Element prediction: Off

Number of isotope peaks used for i-FIT = 3

Monoisotopic Mass, Even Electron Ions

4583 formula(e) evaluated with 1 results within limits (up to 50 closest results for each mass)

Elements Used:

C: 33-33 H: 24-24 N: 0-100 O: 0-100 Na: 0-2 S: 1-2 Br: 1-4

7

250403-12-761-2-YQZ-18 22 (0.218)

1: TOF MS ES+  
3.73e+04

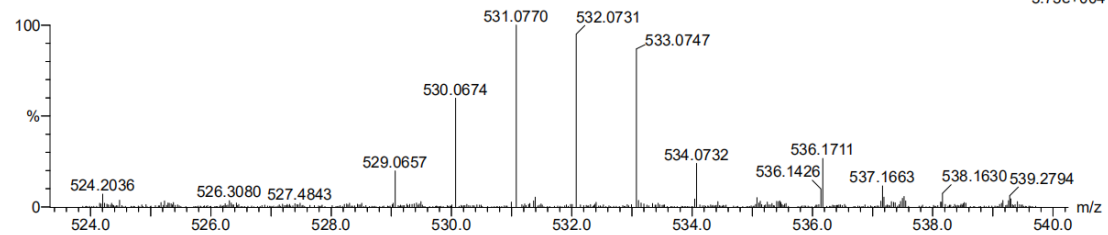

Minimum: -1.5  
Maximum: 50.0

| Mass     | Calc. Mass | mDa  | PPM  | DBE  | i-FIT | Norm | Conf (%) | Formula                              |
|----------|------------|------|------|------|-------|------|----------|--------------------------------------|
| 531.0770 | 531.0782   | -1.2 | -2.3 | 21.5 | 717.6 | n/a  | n/a      | C <sub>33</sub> H <sub>24</sub> S Br |

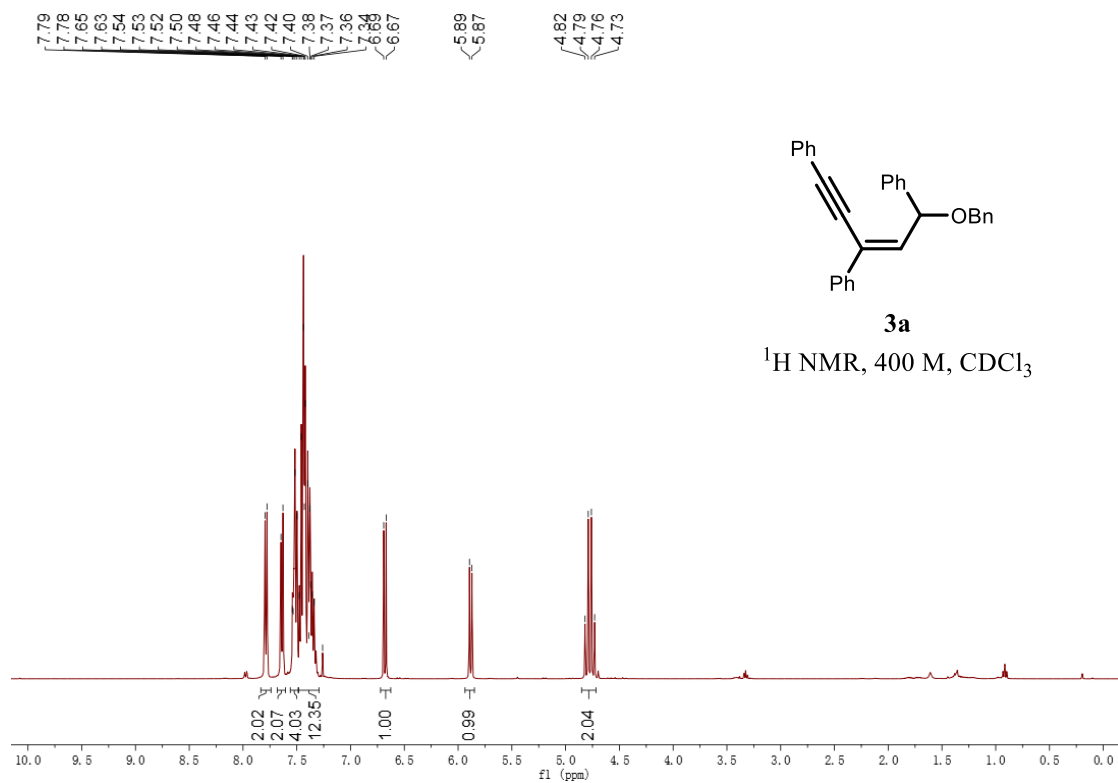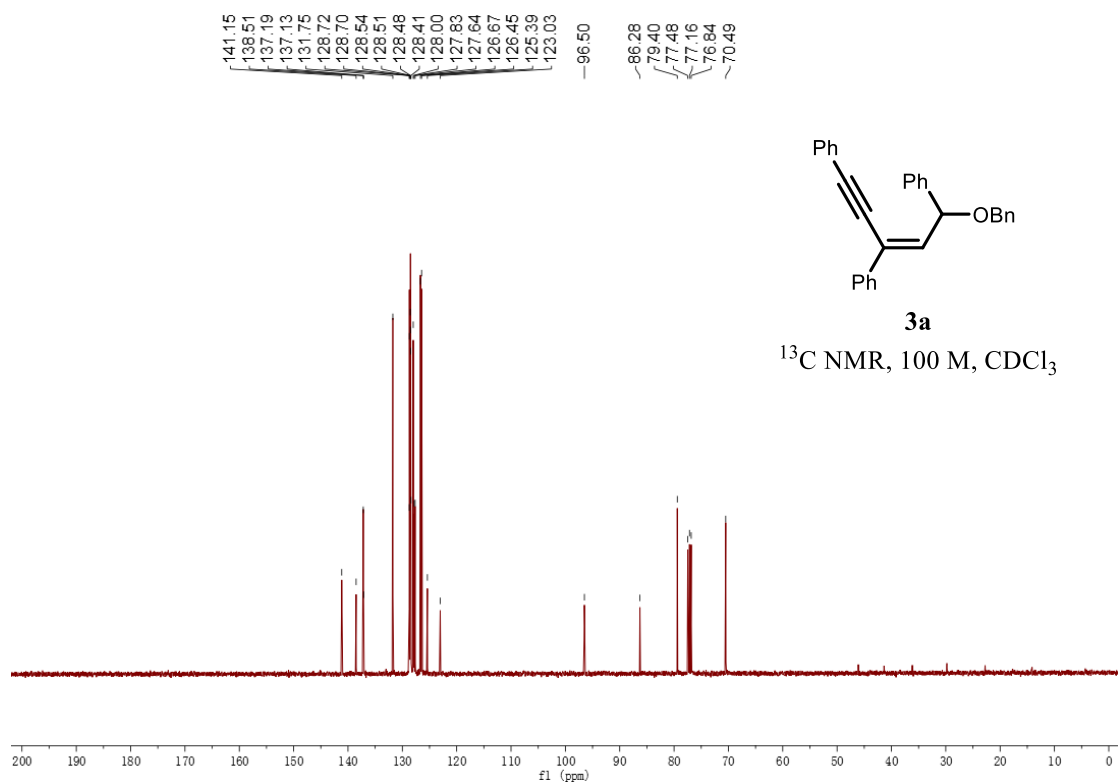

# HRMS spectrum

## Elemental Composition Report

Page 1

### Single Mass Analysis

Tolerance = 5.0 mDa / DBE: min = -1.5, max = 50.0

Element prediction: Off

Number of isotope peaks used for i-FIT = 3

Monoisotopic Mass, Even Electron Ions

1131 formula(e) evaluated with 1 results within limits (up to 50 closest results for each mass)

Elements Used:

C: 30-30 H: 24-24 N: 0-100 O: 0-100 Na: 0-2

7

250403-12-761-2-YQZ-19 21 (0.210)

1: TOF MS ES+  
2.17e+006

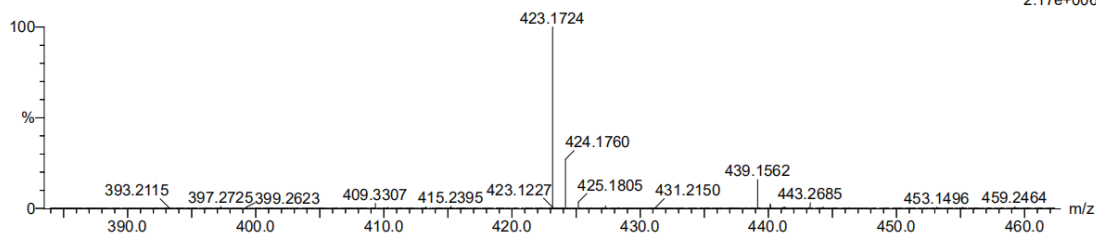

Minimum: -1.5  
Maximum: 5.0 10.0 50.0

| Mass     | Calc. Mass | mDa  | PPM  | DBE  | i-FIT | Norm | Conf (%) | Formula      |
|----------|------------|------|------|------|-------|------|----------|--------------|
| 423.1724 | 423.1725   | -0.1 | -0.2 | 18.5 | 981.1 | n/a  | n/a      | C30 H24 O Na |

7.81, 7.79, 7.76, 7.65, 7.64, 7.63, 7.62, 7.59, 7.56, 7.52, 7.50, 7.50, 7.47, 7.45, 7.45, 7.43, 7.40, 7.39, 6.98, 6.89, 5.92, 5.90, 4.87, 4.84, 4.82, 4.79

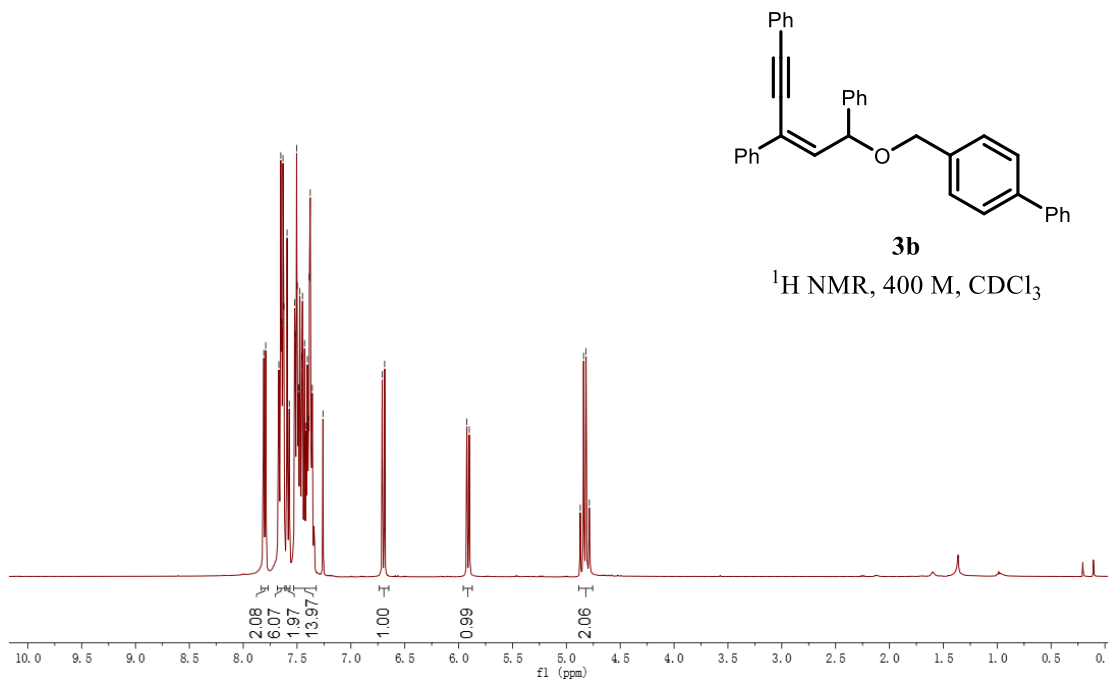

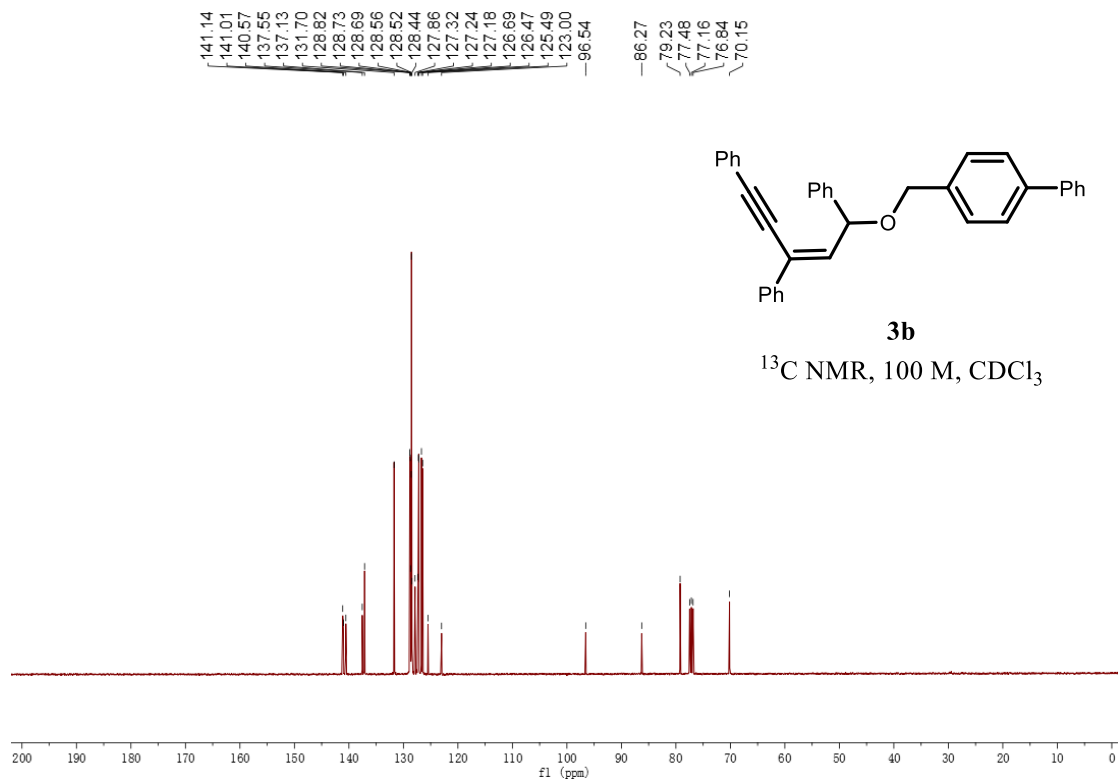

### HRMS spectrum

#### Elemental Composition Report

Page 1

#### Single Mass Analysis

Tolerance = 5.0 mDa / DBE: min = -1.5, max = 50.0

Element prediction: Off

Number of isotope peaks used for i-FIT = 3

Monoisotopic Mass, Even Electron Ions

1590 formula(e) evaluated with 1 results within limits (up to 50 closest results for each mass)

Elements Used:

C: 36-36 H: 28-28 N: 0-100 O: 0-100 Na: 0-2

7

250403-12-761-2-YQZ-20 16 (0.161)

1: TOF MS ES+  
5.40e+006

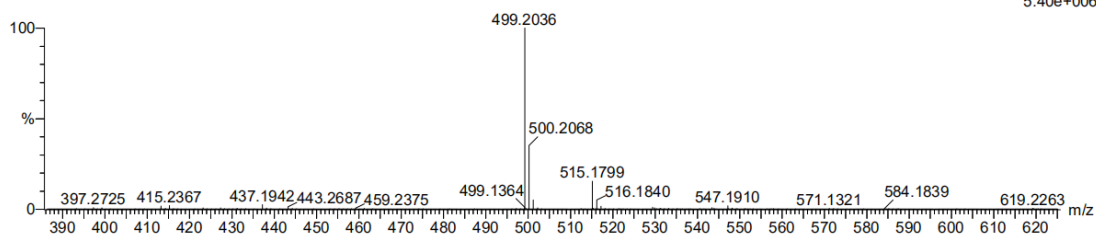

Minimum: -1.5  
Maximum: 5.0 10.0 50.0

| Mass     | Calc. Mass | mDa  | PPM  | DBE  | i-FIT  | Norm | Conf(%) | Formula                              |
|----------|------------|------|------|------|--------|------|---------|--------------------------------------|
| 499.2036 | 499.2038   | -0.2 | -0.4 | 22.5 | 1045.9 | n/a  | n/a     | C <sub>36</sub> H <sub>28</sub> O Na |

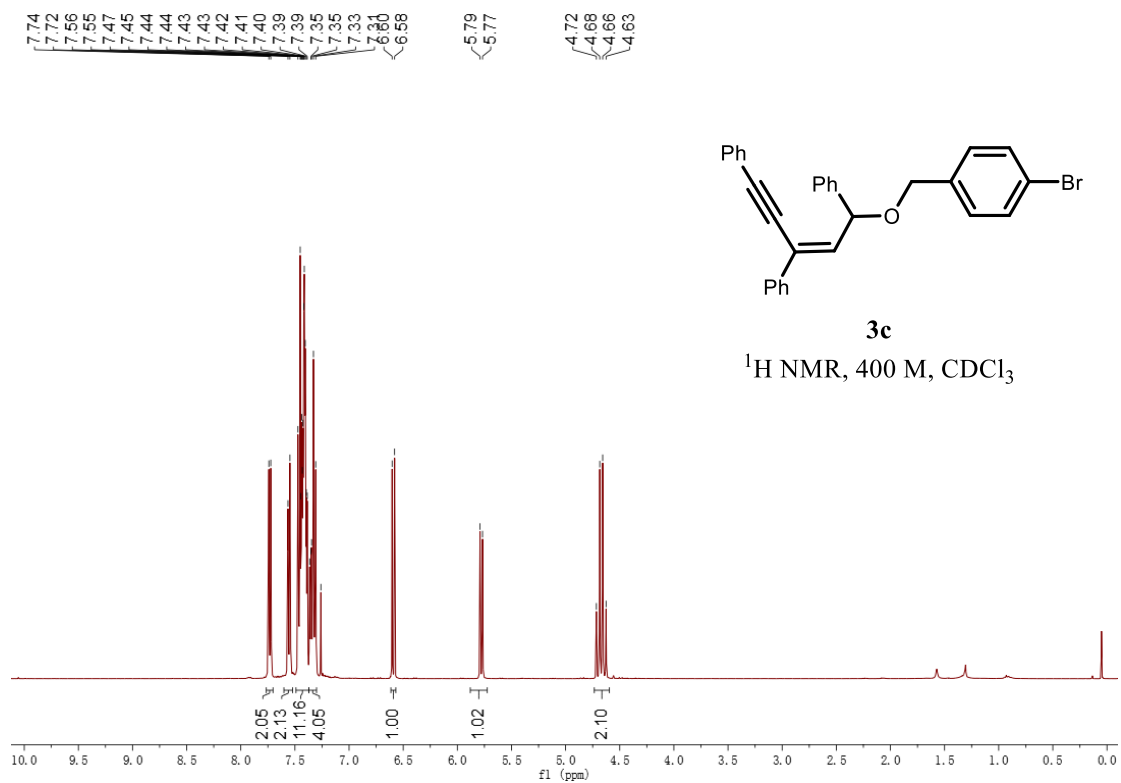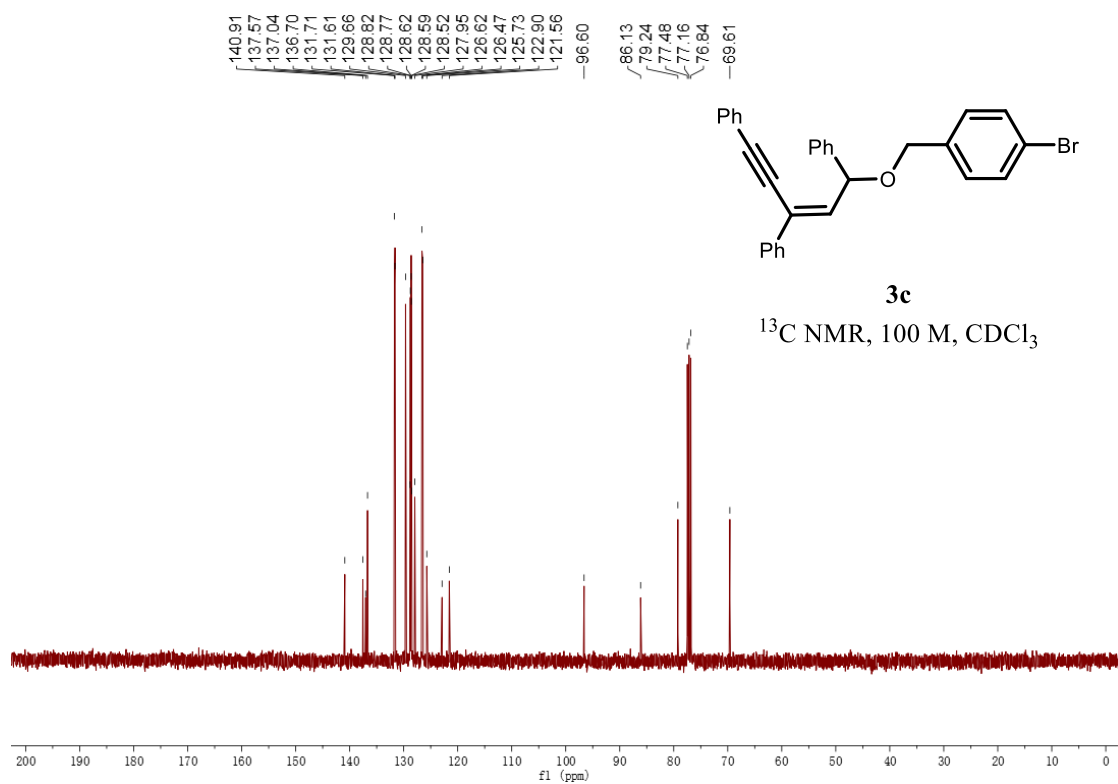

# HRMS spectrum

## Elemental Composition Report

Page 1

### Single Mass Analysis

Tolerance = 10.0 PPM / DBE: min = -1.5, max = 50.0

Element prediction: Off

Number of isotope peaks used for i-FIT = 3

Monoisotopic Mass, Even Electron Ions

37 formula(e) evaluated with 1 results within limits (all results (up to 1000) for each mass)

Elements Used:

C: 14-31 H: 1-60 O: 1-3 Br: 1-3

48

250511-2-57 34 (0.325)

1: TOF MS ES+  
8.03e+001

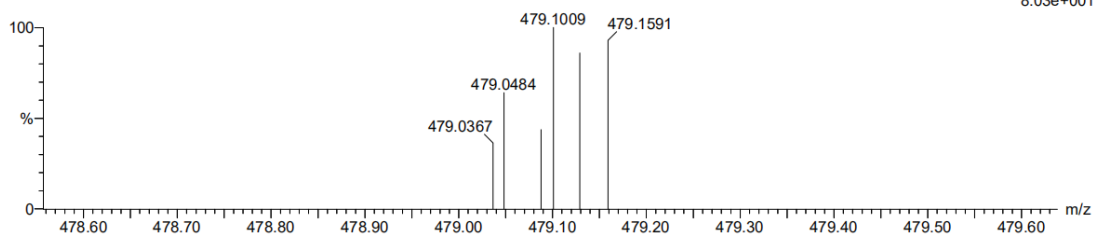

Minimum: -1.5  
Maximum: 5.0 10.0 50.0

| Mass     | Calc. Mass | mDa  | PPM  | DBE  | i-FIT | Norm | Conf (%) | Formula      |
|----------|------------|------|------|------|-------|------|----------|--------------|
| 479.1009 | 479.1011   | -0.2 | -0.4 | 18.5 | 35.9  | n/a  | n/a      | C30 H24 O Br |

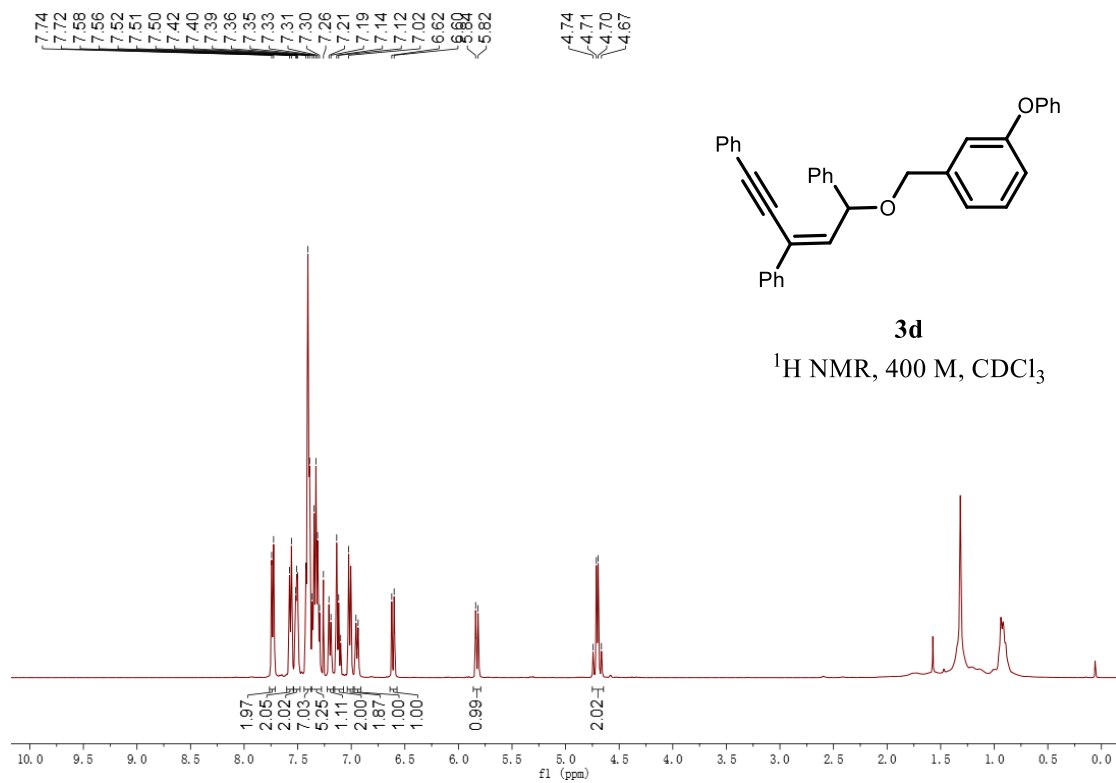

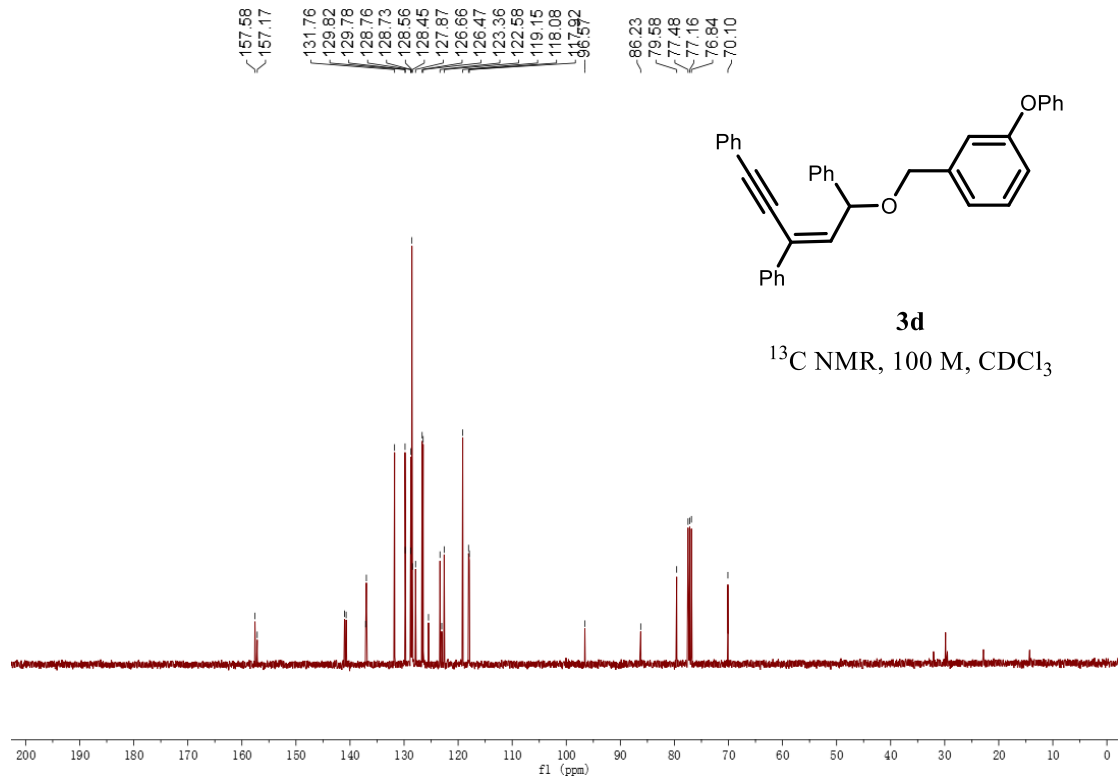

### HRMS spectrum

#### Elemental Composition Report

Page 1

#### Single Mass Analysis

Tolerance = 5.0 mDa / DBE: min = -1.5, max = 50.0

Element prediction: Off

Number of isotope peaks used for i-FIT = 3

Monoisotopic Mass, Even Electron Ions

1681 formula(e) evaluated with 1 results within limits (up to 50 closest results for each mass)

Elements Used:

C: 36-36 H: 28-28 N: 0-100 O: 0-100 Na: 0-2

7

250403-12-761-2-YQZ-23 17 (0.169)

1: TOF MS ES+  
1.12e+007

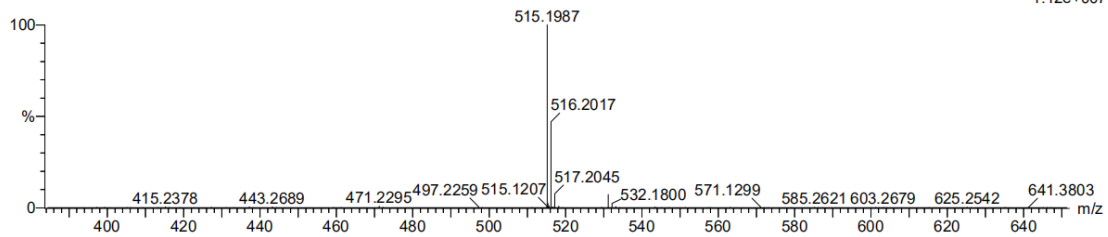

Minimum: -1.5  
 Maximum: 50.0

| Mass     | Calc. Mass | mDa | PPM | DBE  | i-FIT | Norm | Conf (%) | Formula                                           |
|----------|------------|-----|-----|------|-------|------|----------|---------------------------------------------------|
| 515.1987 | 515.1987   | 0.0 | 0.0 | 22.5 | 965.1 | n/a  | n/a      | C <sub>36</sub> H <sub>28</sub> O <sub>2</sub> Na |

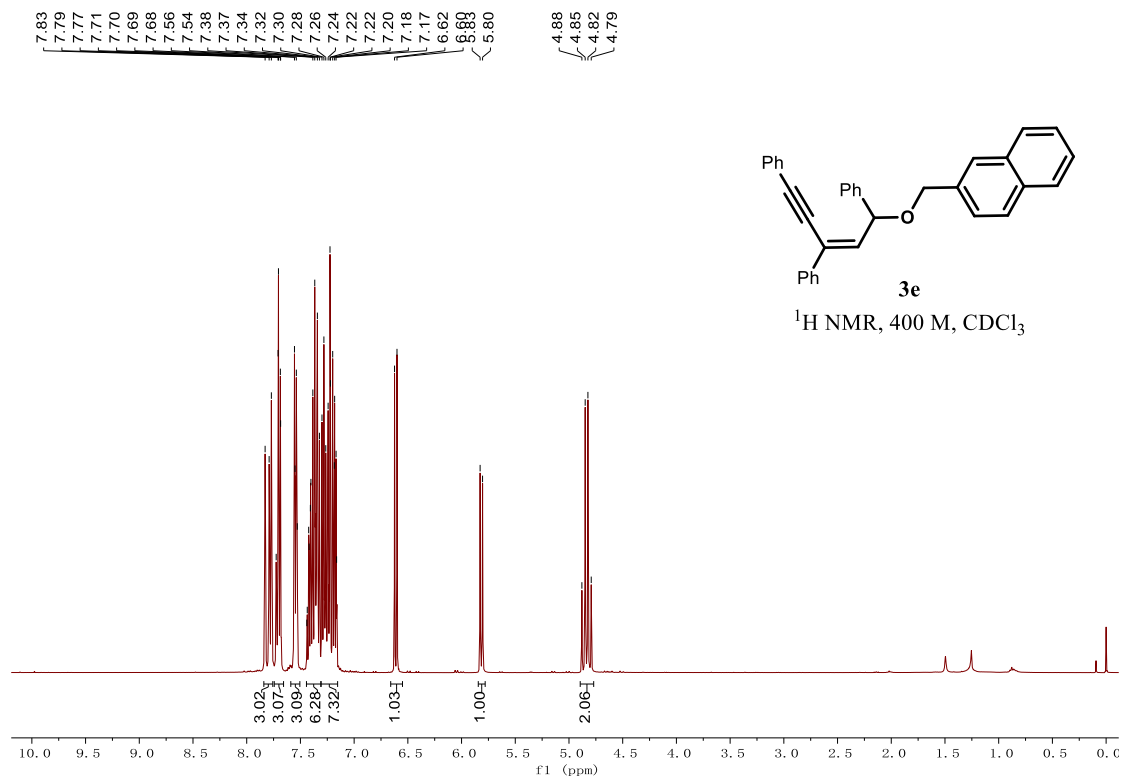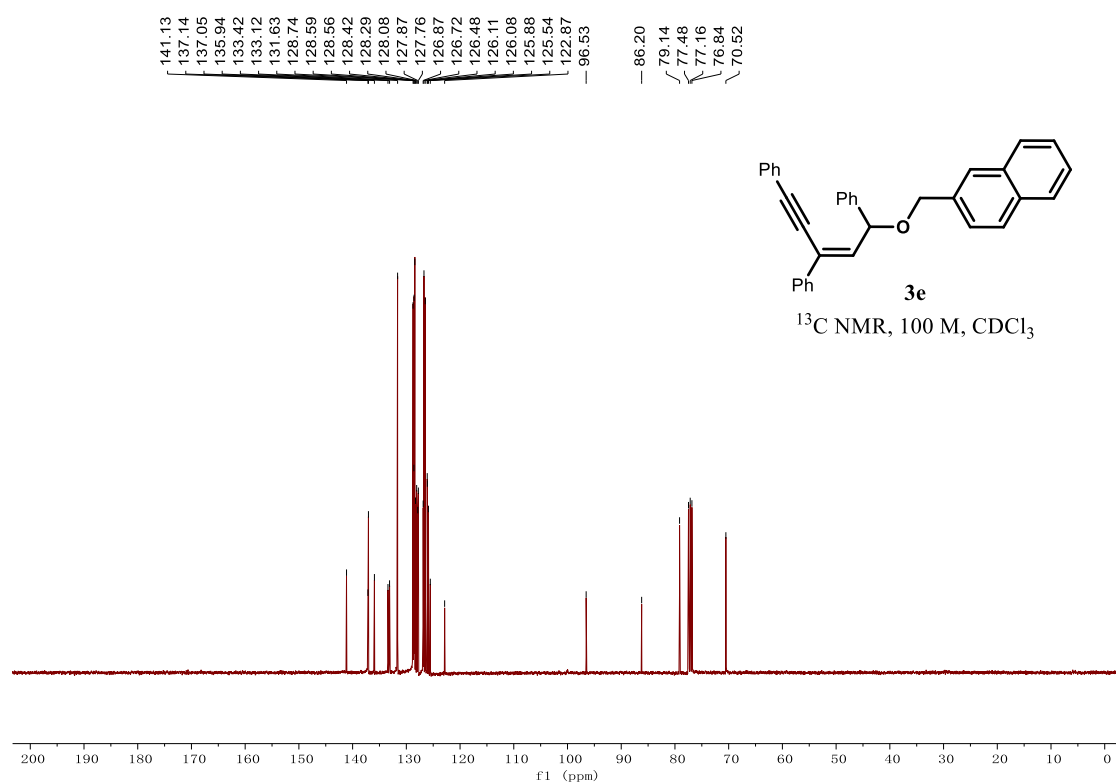

# HRMS spectrum

## Elemental Composition Report

Page 1

### Single Mass Analysis

Tolerance = 5.0 mDa / DBE: min = -1.5, max = 50.0

Element prediction: Off

Number of isotope peaks used for i-FIT = 3

Monoisotopic Mass, Even Electron Ions

1424 formula(e) evaluated with 1 results within limits (up to 50 closest results for each mass)

Elements Used:

C: 34-34 H: 26-26 N: 0-100 O: 0-100 Na: 0-2

7

250403-12-761-2-YQZ-21 17 (0.169)

1: TOF MS ES+  
7.18e+006

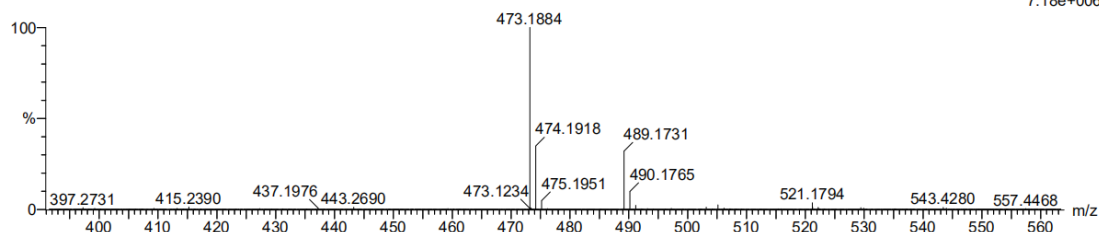

Minimum: -1.5  
Maximum: 5.0 10.0 50.0

| Mass     | Calc. Mass | mDa | PPM | DBE  | i-FIT  | Norm | Conf (%) | Formula      |
|----------|------------|-----|-----|------|--------|------|----------|--------------|
| 473.1884 | 473.1881   | 0.3 | 0.6 | 21.5 | 1030.1 | n/a  | n/a      | C34 H26 O Na |

7.73  
7.73  
7.71  
7.61  
7.60  
7.59  
7.58  
7.55  
7.54  
7.42  
7.41  
7.40  
7.39  
7.39  
7.38  
7.37  
7.36  
7.34  
7.32  
7.30  
6.89  
6.85  
6.08  
6.07  
6.06  
6.04  
6.03  
6.01  
6.00  
5.99  
5.78  
5.76  
5.41  
5.40  
5.36  
5.36  
5.25  
5.25  
5.23  
5.22  
4.22  
4.21  
4.19  
4.18  
4.16  
4.14  
4.13  
4.11

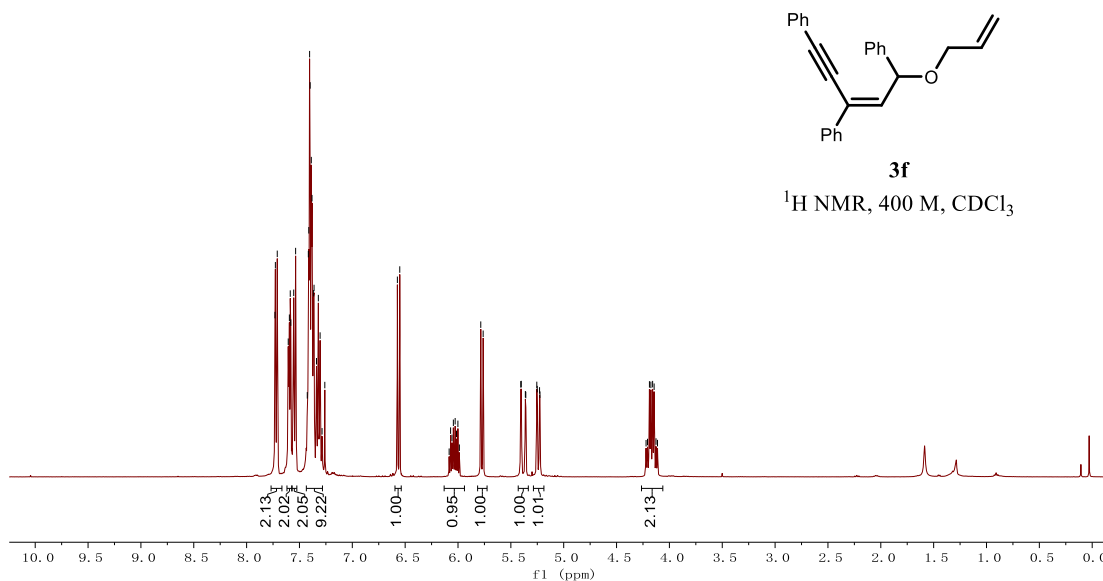

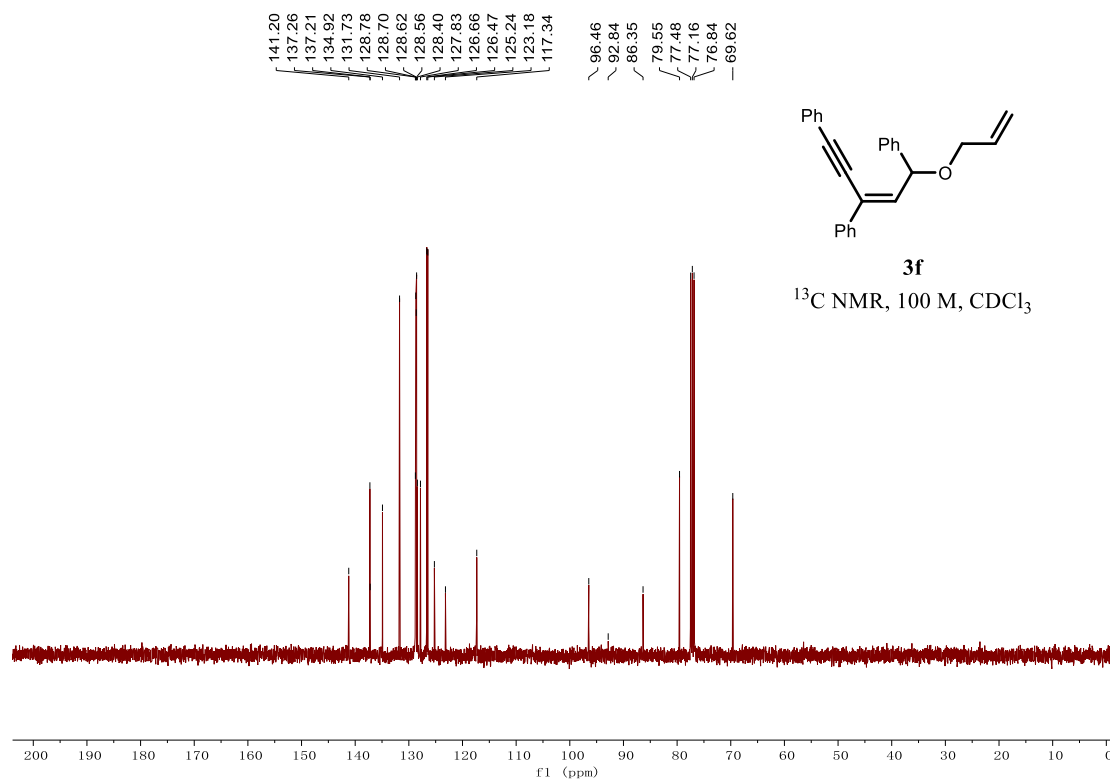

## HRMS spectrum

### Elemental Composition Report

Page 1

#### Single Mass Analysis

Tolerance = 5.0 mDa / DBE: min = -1.5, max = 50.0

Element prediction: Off

Number of isotope peaks used for i-FIT = 3

Monoisotopic Mass, Even Electron Ions

871 formula(e) evaluated with 1 results within limits (up to 50 closest results for each mass)

Elements Used:

C: 26-26 H: 22-22 N: 0-100 O: 0-100 Na: 0-2

7

250403-12-761-2-YQZ-26 15 (0.152)

1: TOF MS ES+  
2.50e+005

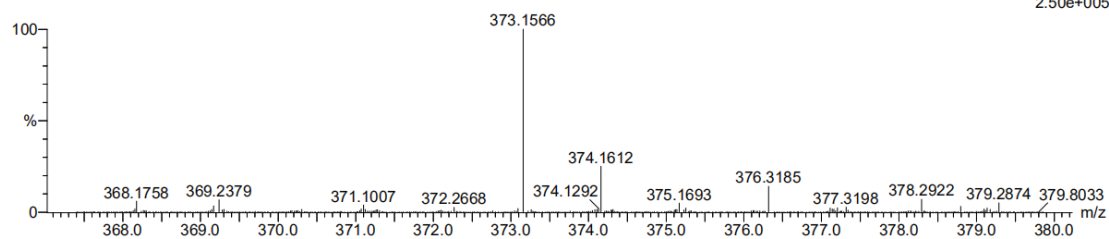

Minimum: -1.5  
Maximum: 5.0 10.0 50.0

| Mass     | Calc. Mass | mDa  | PPM  | DBE  | i-FIT  | Norm | Conf (%) | Formula                              |
|----------|------------|------|------|------|--------|------|----------|--------------------------------------|
| 373.1566 | 373.1568   | -0.2 | -0.5 | 15.5 | 1228.4 | n/a  | n/a      | C <sub>26</sub> H <sub>22</sub> O Na |

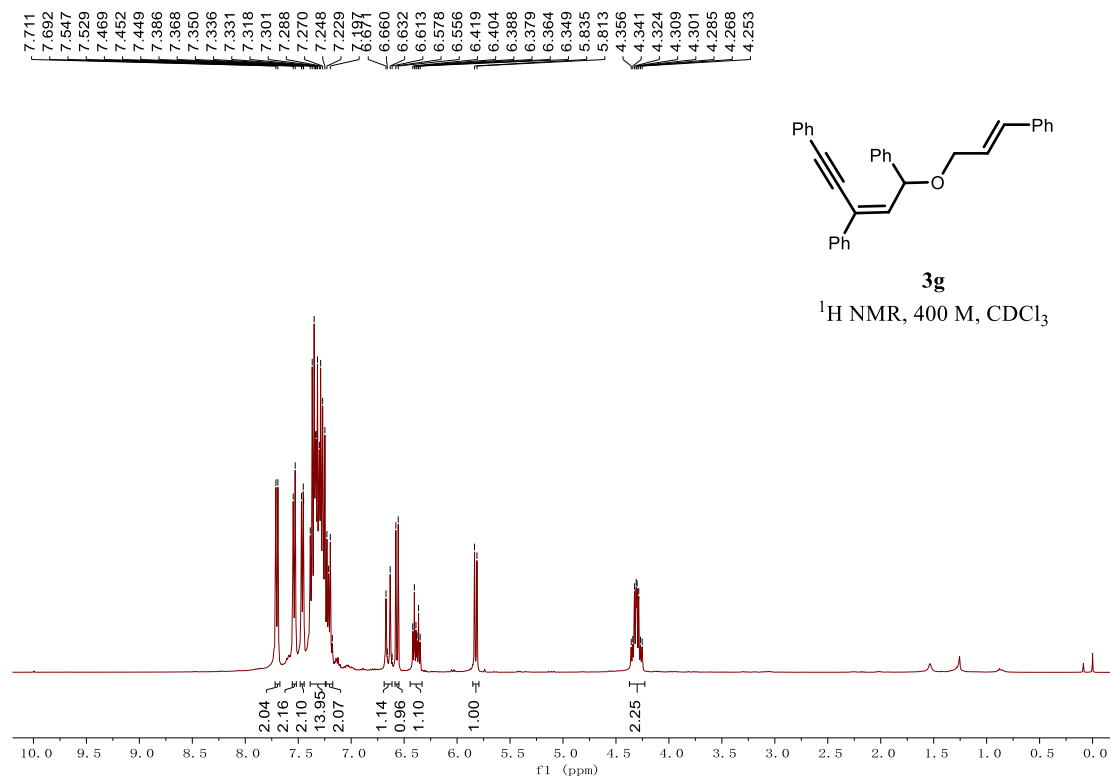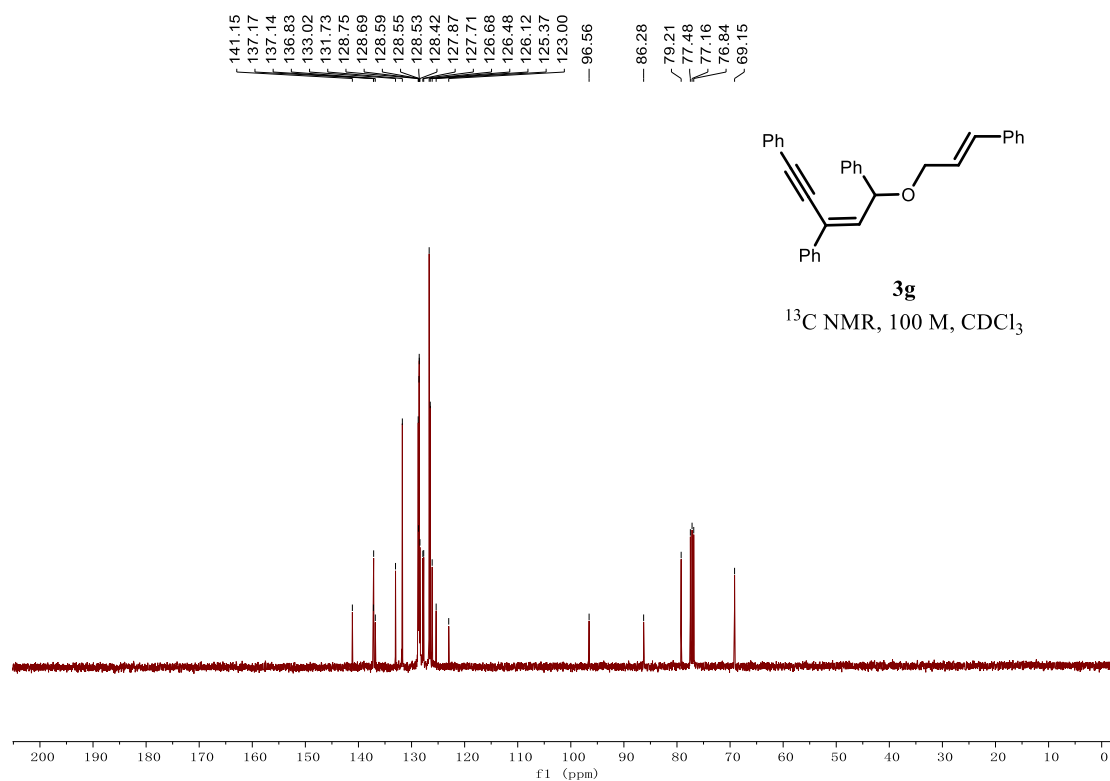

# HRMS spectrum

## Elemental Composition Report

Page 1

### Single Mass Analysis

Tolerance = 5.0 mDa / DBE: min = -1.5, max = 50.0

Element prediction: Off

Number of isotope peaks used for i-FIT = 3

Monoisotopic Mass, Even Electron Ions

1279 formula(e) evaluated with 1 results within limits (up to 50 closest results for each mass)

Elements Used:

C: 32-32 H: 26-26 N: 0-100 O: 0-100 Na: 0-2

7

250403-12-761-2-YQZ-15 17 (0.169)

1: TOF MS ES+  
1.40e+006

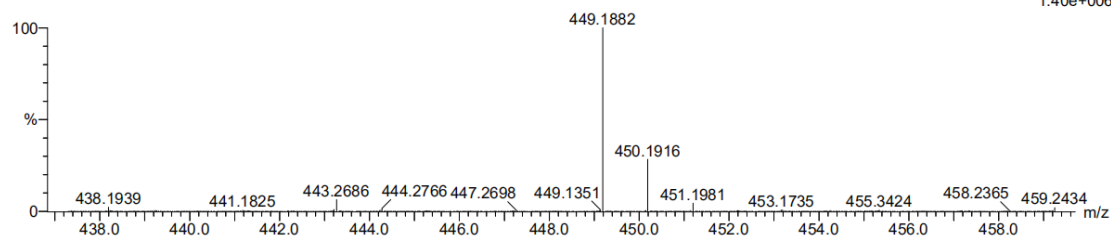

Minimum: -1.5  
Maximum: 5.0 10.0 50.0

| Mass     | Calc. Mass | mDa | PPM | DBE  | i-FIT | Norm | Conf (%) | Formula      |
|----------|------------|-----|-----|------|-------|------|----------|--------------|
| 449.1882 | 449.1881   | 0.1 | 0.2 | 19.5 | 963.7 | n/a  | n/a      | C32 H26 O Na |

7.72 7.70 7.60 7.59 7.58 7.55 7.53 7.42 7.41 7.40 7.39 7.38 7.37 7.36 7.35 7.31 6.55 5.71 5.69 3.76 3.74 3.72 3.70 3.65 3.63 3.61 3.59 1.34 1.32 1.30

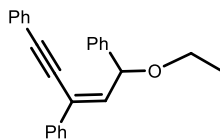

<sup>1</sup>H NMR, 400 M, CDCl<sub>3</sub>

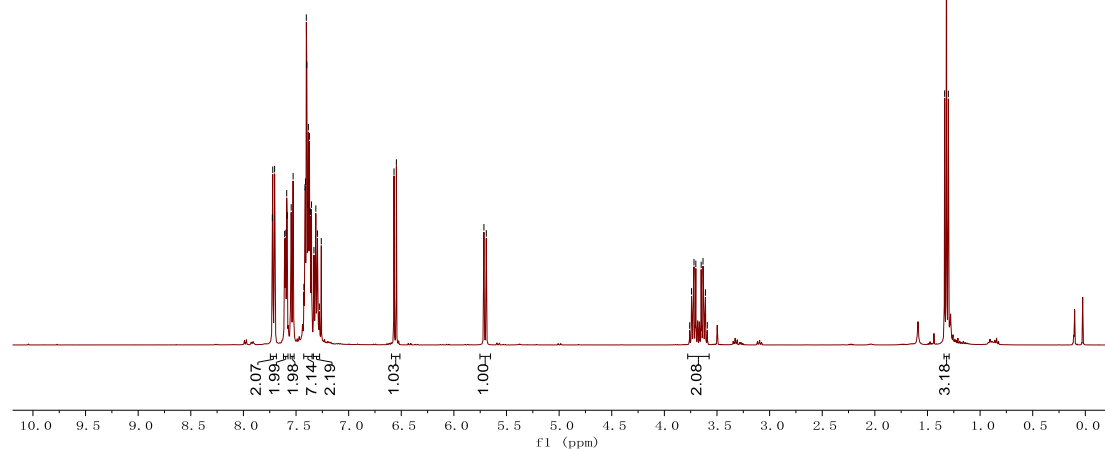

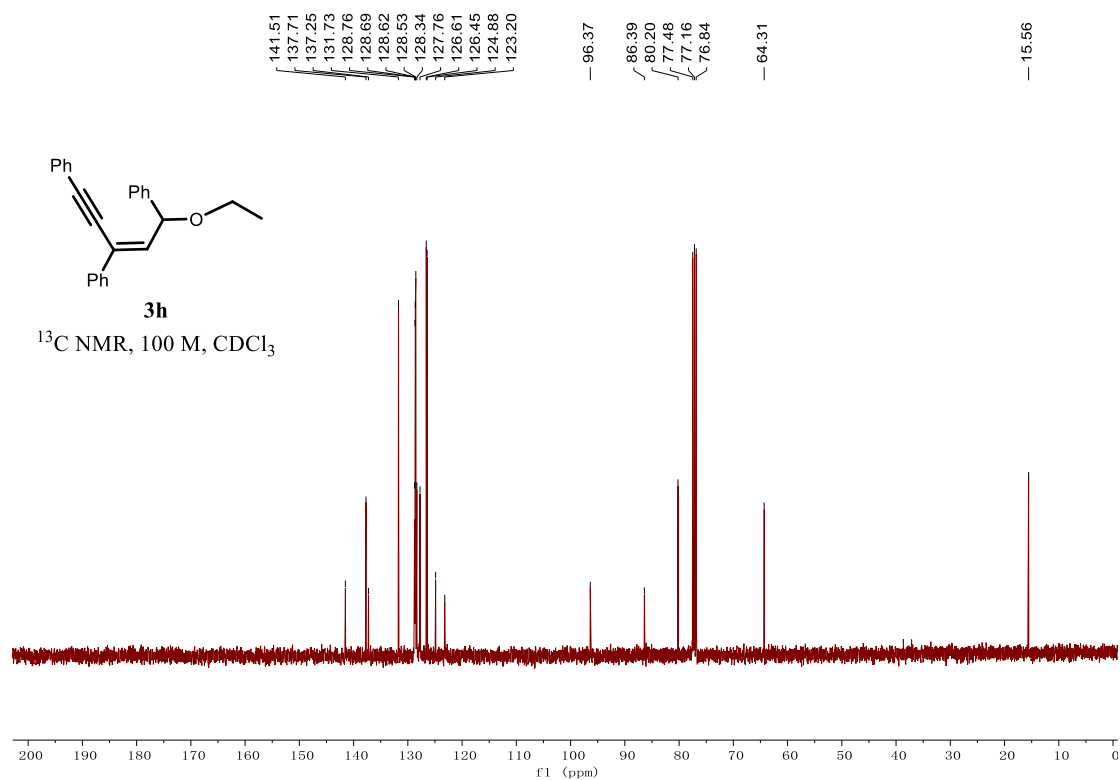

## HRMS spectrum

### Elemental Composition Report

Page 1

#### Single Mass Analysis

Tolerance = 10.0 PPM / DBE: min = -1.5, max = 50.0

Element prediction: Off

Number of isotope peaks used for i-FIT = 3

Monoisotopic Mass, Even Electron Ions

13 formula(e) evaluated with 1 results within limits (all results (up to 1000) for each mass)

Elements Used:

C: 25-31 H: 1-60 O: 1-12

48

250511-2-55 52 (0.487)

1: TOF MS ES+  
1.08e+002

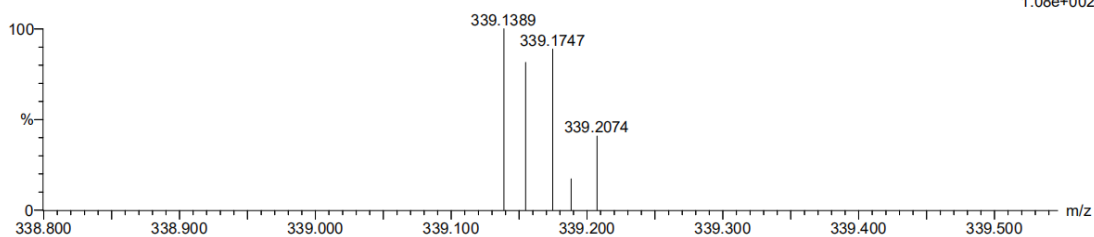

Minimum: -1.5  
 Maximum: 5.0 10.0 50.0

| Mass     | Calc. Mass | mDa  | PPM  | DBE  | i-FIT | Norm | Conf(%) | Formula                           |
|----------|------------|------|------|------|-------|------|---------|-----------------------------------|
| 339.1747 | 339.1749   | -0.2 | -0.6 | 14.5 | 31.4  | n/a  | n/a     | C <sub>25</sub> H <sub>23</sub> O |

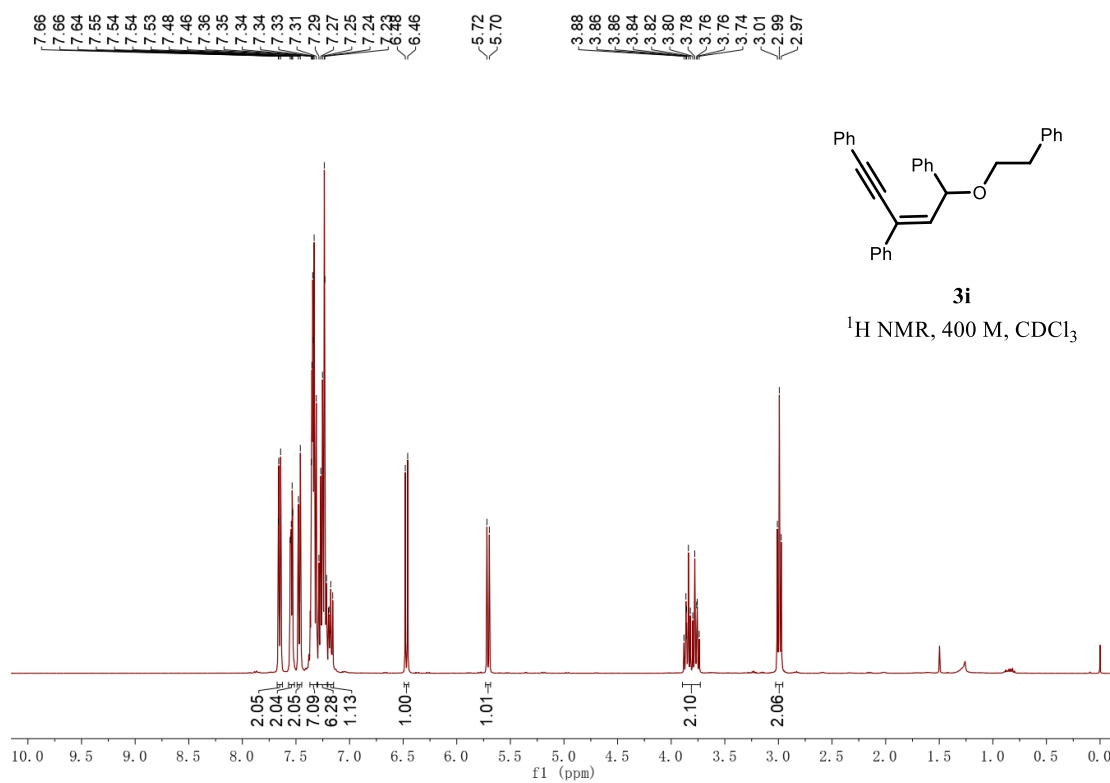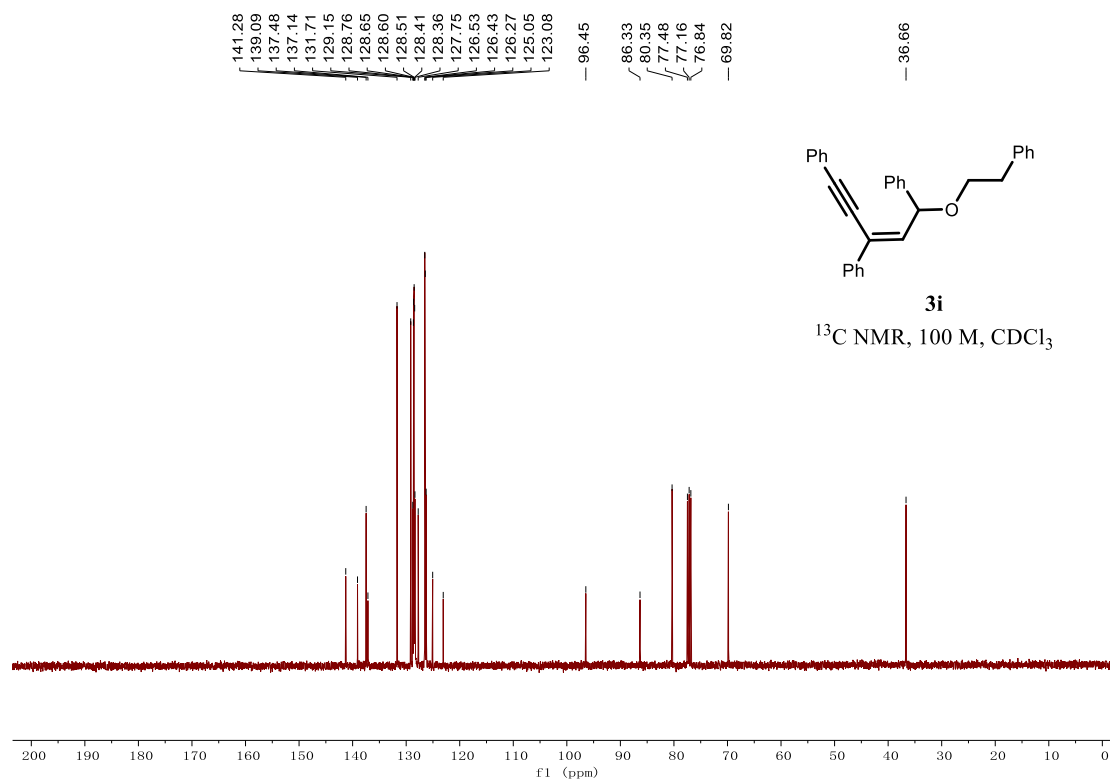

# HRMS spectrum

## Elemental Composition Report

Page 1

### Single Mass Analysis

Tolerance = 5.0 mDa / DBE: min = -1.5, max = 50.0

Element prediction: Off

Number of isotope peaks used for i-FIT = 3

Monoisotopic Mass, Even Electron Ions

1208 formula(e) evaluated with 1 results within limits (up to 50 closest results for each mass)

Elements Used:

C: 31-31 H: 26-26 N: 0-100 O: 0-100 Na: 0-2

7

250403-12-761-2-YQZ-14 15 (0.152)

1: TOF MS ES+  
9.89e+006

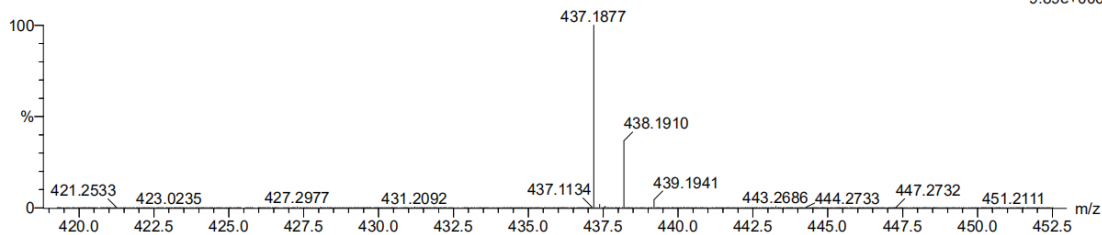

Minimum: -1.5  
Maximum: 5.0 10.0 50.0

| Mass     | Calc. Mass | mDa  | PPM  | DBE  | i-FIT  | Norm | Conf (%) | Formula      |
|----------|------------|------|------|------|--------|------|----------|--------------|
| 437.1877 | 437.1881   | -0.4 | -0.9 | 18.5 | 1058.8 | n/a  | n/a      | C31 H26 O Na |

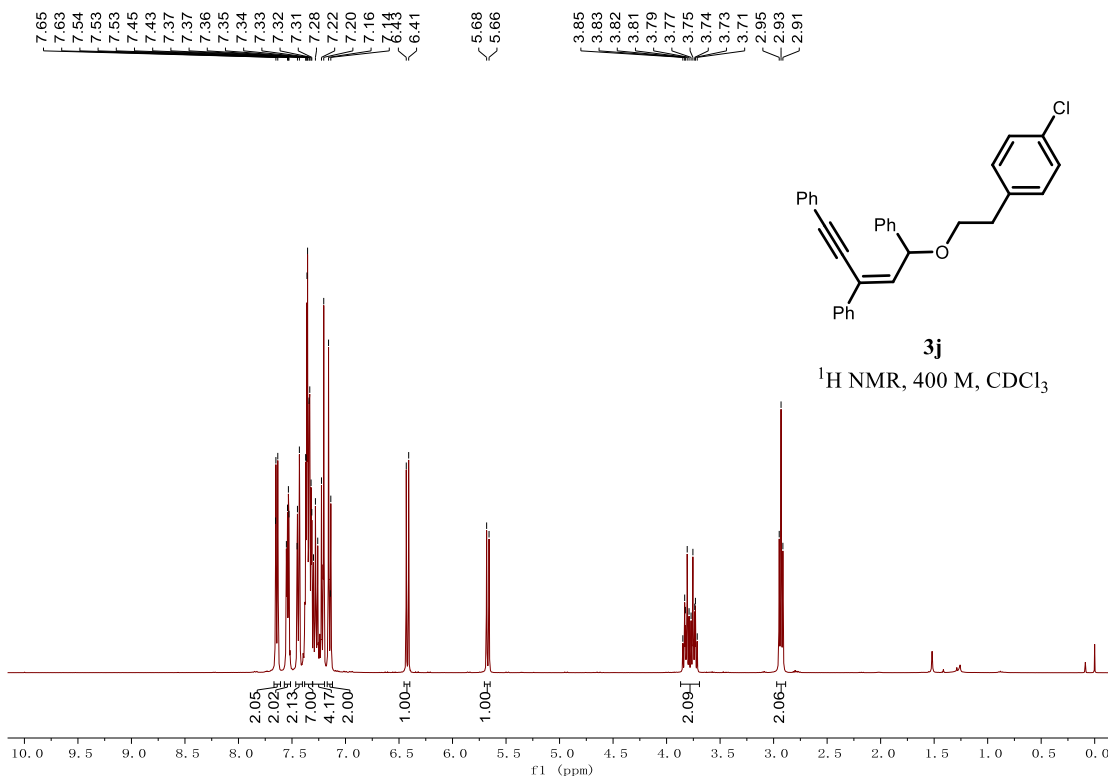

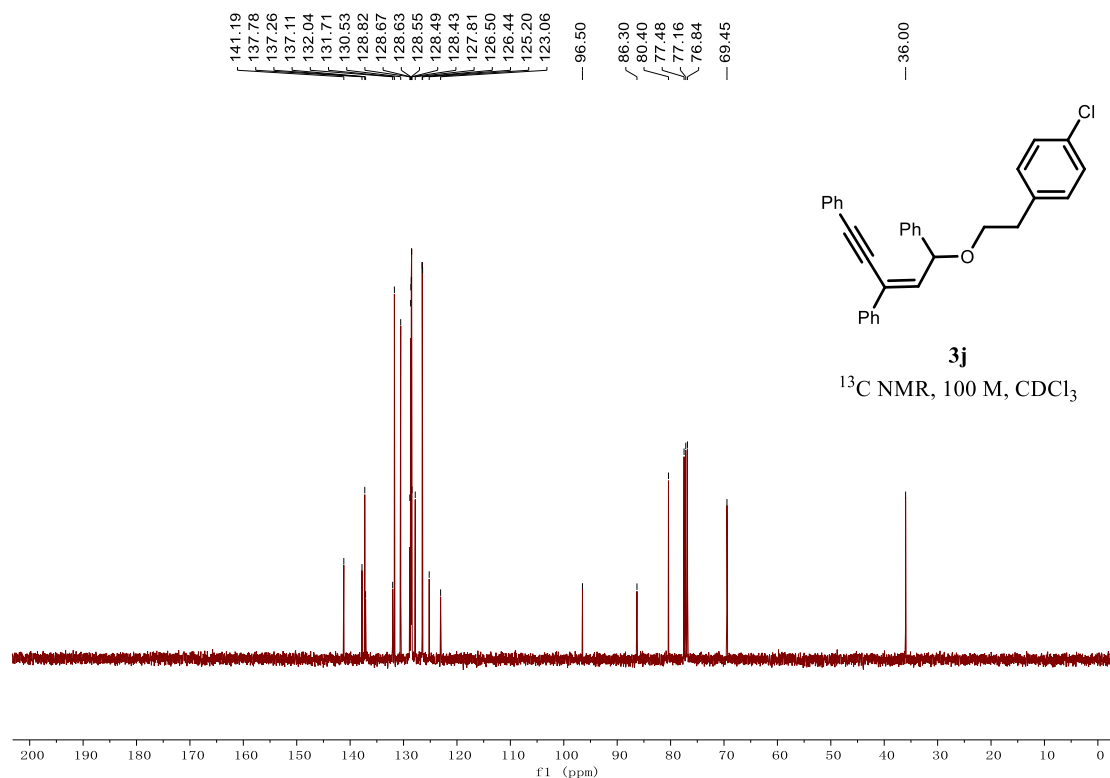

## HRMS spectrum

### Elemental Composition Report

Page 1

#### Single Mass Analysis

Tolerance = 5.0 mDa / DBE: min = -1.5, max = 50.0

Element prediction: Off

Number of isotope peaks used for i-FIT = 3

Monoisotopic Mass, Even Electron Ions

3802 formula(e) evaluated with 1 results within limits (up to 50 closest results for each mass)

Elements Used:

C: 31-31 H: 25-25 N: 0-100 O: 0-100 Na: 0-2 Cl: 1-4

7

250403-12-761-2-YQZ-28 16 (0.161)

1: TOF MS ES+  
6.45e+006

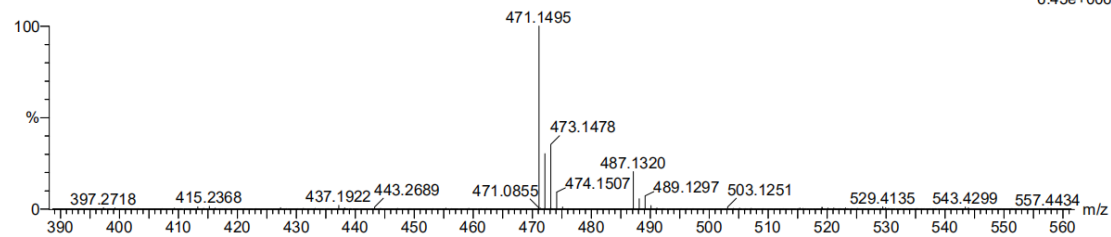

Minimum: -1.5  
Maximum: 5.0 10.0 50.0

| Mass     | Calc. Mass | mDa | PPM | DBE  | i-FIT  | Norm | Conf (%) | Formula         |
|----------|------------|-----|-----|------|--------|------|----------|-----------------|
| 471.1495 | 471.1492   | 0.3 | 0.6 | 18.5 | 1027.5 | n/a  | n/a      | C31 H25 O Na Cl |

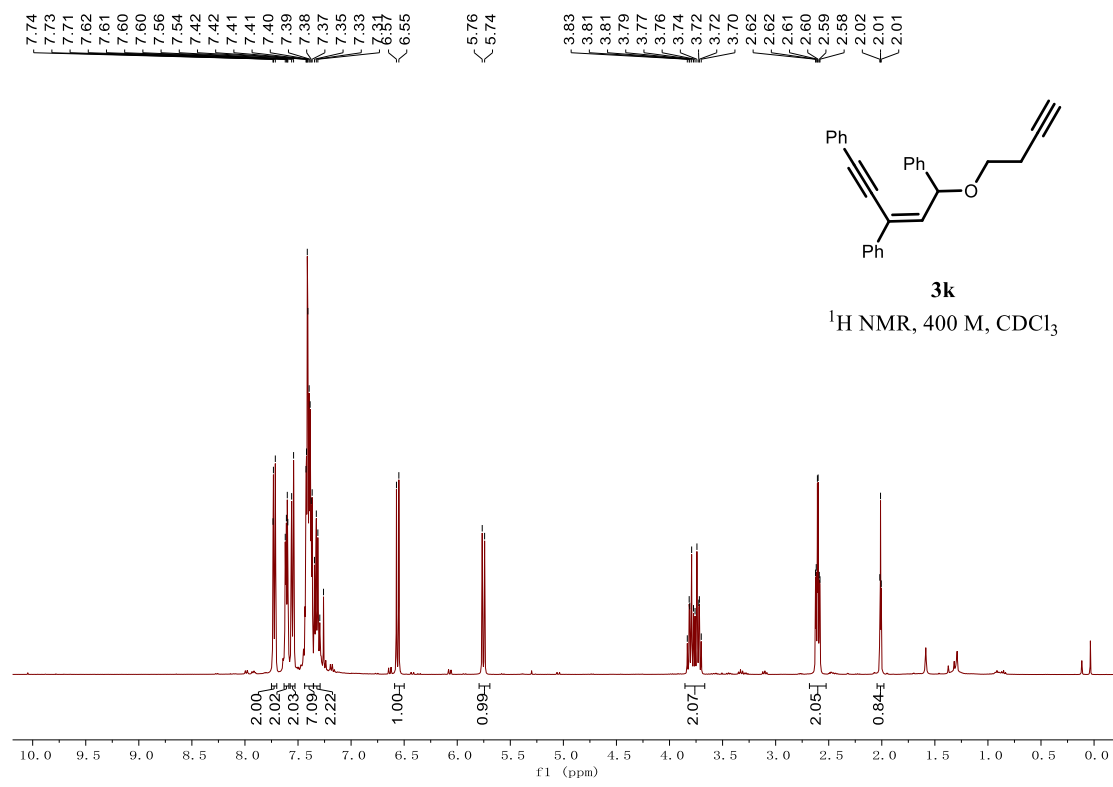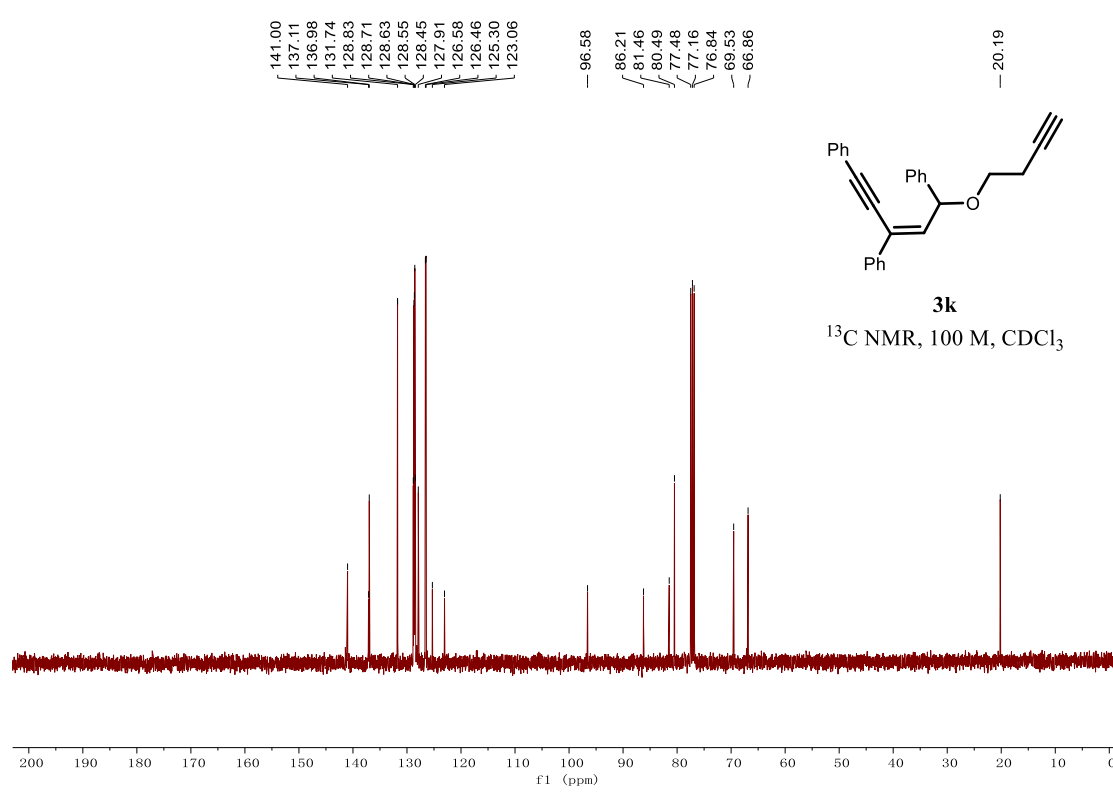

# HRMS spectrum

## Elemental Composition Report

Page 1

### Single Mass Analysis

Tolerance = 10.0 PPM / DBE: min = -1.5, max = 50.0

Element prediction: Off

Number of isotope peaks used for i-FIT = 3

Monoisotopic Mass, Even Electron Ions

14 formula(e) evaluated with 1 results within limits (all results (up to 1000) for each mass)

Elements Used:

C: 14-27 H: 1-60 O: 1-3 Na: 1-1

48

250511-2-53 4 (0.059)

1: TOF MS ES+  
2.31e+002

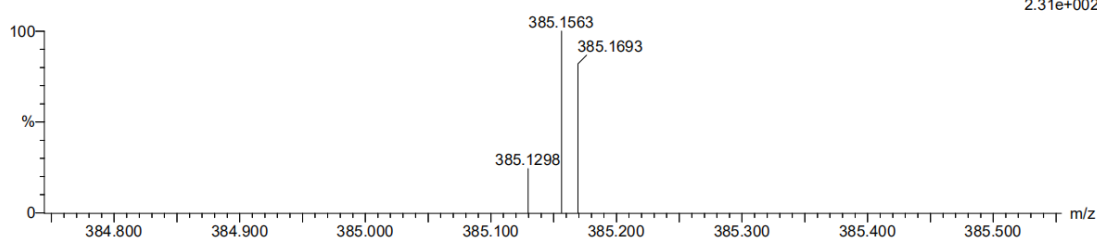

Minimum: -1.5  
Maximum: 5.0 10.0 50.0

| Mass     | Calc. Mass | mDa  | PPM  | DBE  | i-FIT | Norm | Conf (%) | Formula      |
|----------|------------|------|------|------|-------|------|----------|--------------|
| 385.1563 | 385.1568   | -0.5 | -1.3 | 16.5 | 30.9  | n/a  | n/a      | C27 H22 O Na |

7.67, 7.65, 7.54, 7.53, 7.52, 7.49, 7.47, 7.36, 7.34, 7.32, 7.30, 7.28, 7.27, 7.25, 7.21, 7.19, 7.17, 7.13, 6.41, 6.49, 5.70, 5.68, 3.87, 3.85, 3.84, 3.83, 3.81, 3.79, 3.77, 3.76, 3.75, 3.22, 3.21, 3.19

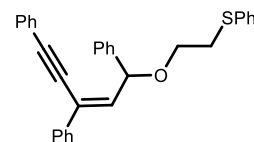

**31**

<sup>1</sup>H NMR, 400 M, CDCl<sub>3</sub>

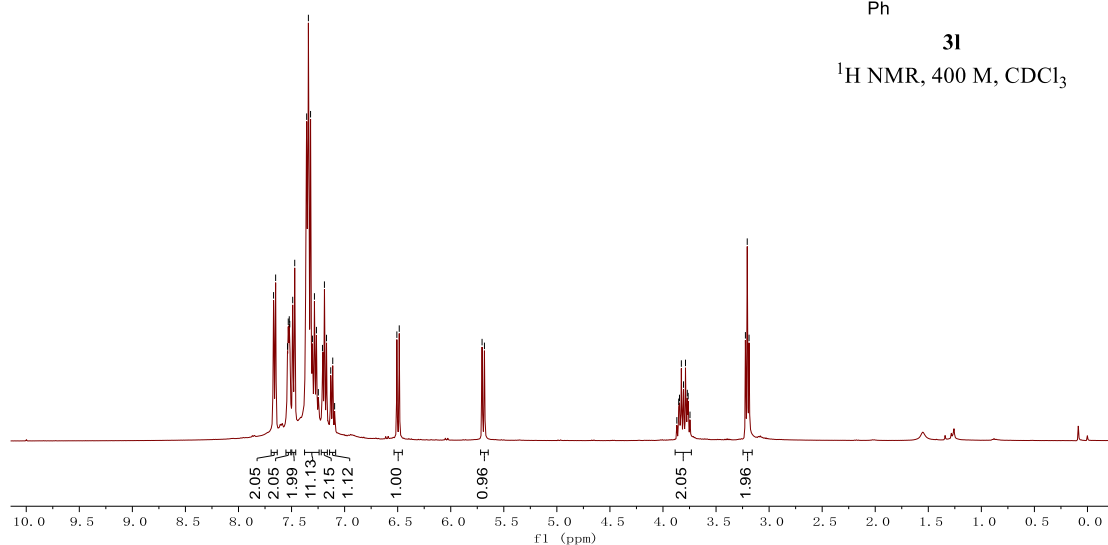

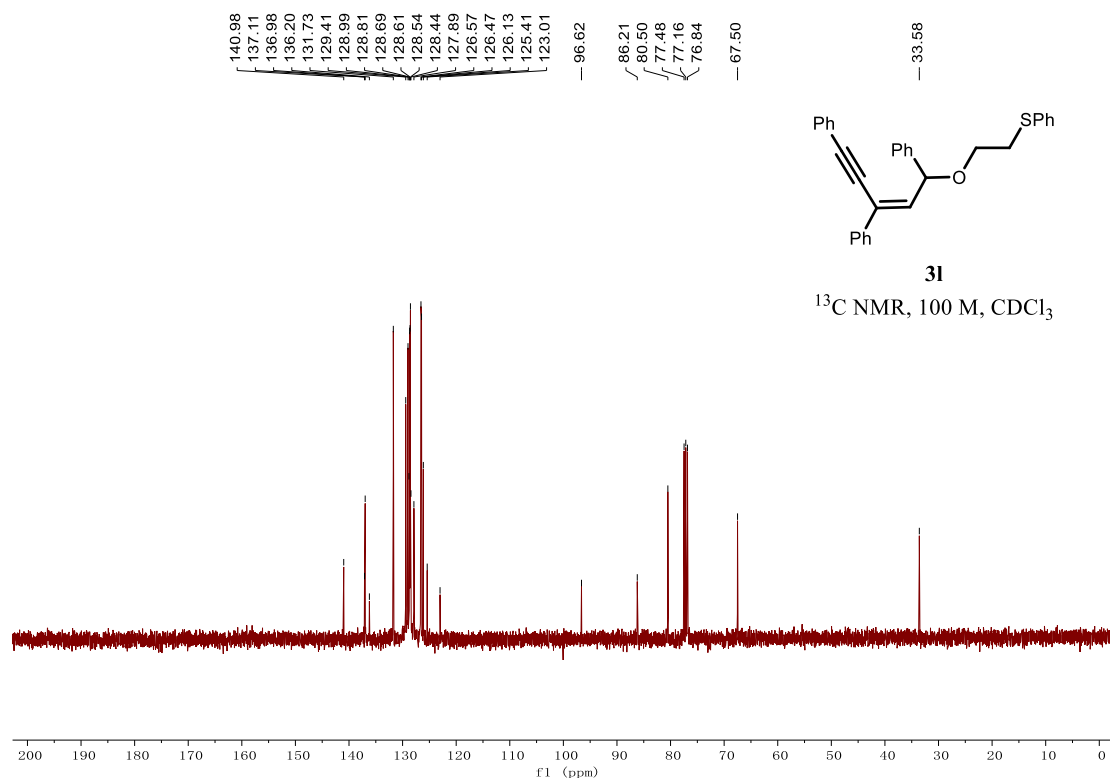

## HRMS spectrum

### Elemental Composition Report

Page 1

#### Single Mass Analysis

Tolerance = 10.0 PPM / DBE: min = -1.5, max = 50.0

Element prediction: Off

Number of isotope peaks used for i-FIT = 3

Monoisotopic Mass, Odd and Even Electron Ions

22 formula(e) evaluated with 1 results within limits (all results (up to 1000) for each mass)

Elements Used:

C: 31-31 H: 1-60 O: 1-12 S: 1-2 Na: 1-1

48

250511-2-59 16 (0.162)

1: TOF MS ES+  
3.90e+005

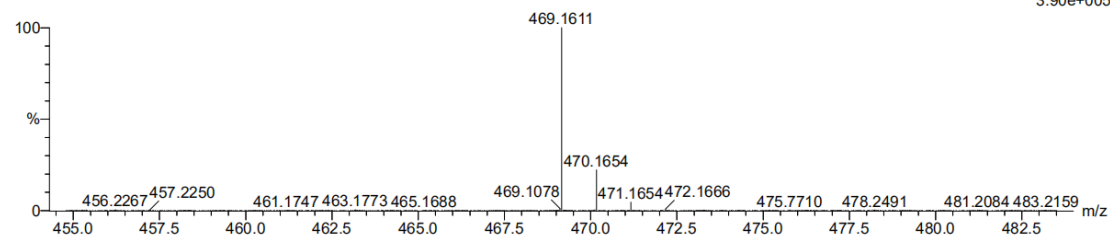

Minimum: -1.5  
Maximum: 5.0 10.0 50.0

| Mass     | Calc. Mass | mDa | PPM | DBE  | i-FIT | Norm | Conf (%) | Formula                                                          |
|----------|------------|-----|-----|------|-------|------|----------|------------------------------------------------------------------|
| 469.1611 | 469.1602   | 0.9 | 1.9 | 18.5 | 768.5 | n/a  | n/a      | C <sub>31</sub> H <sub>26</sub> O <sub>1</sub> S <sub>1</sub> Na |

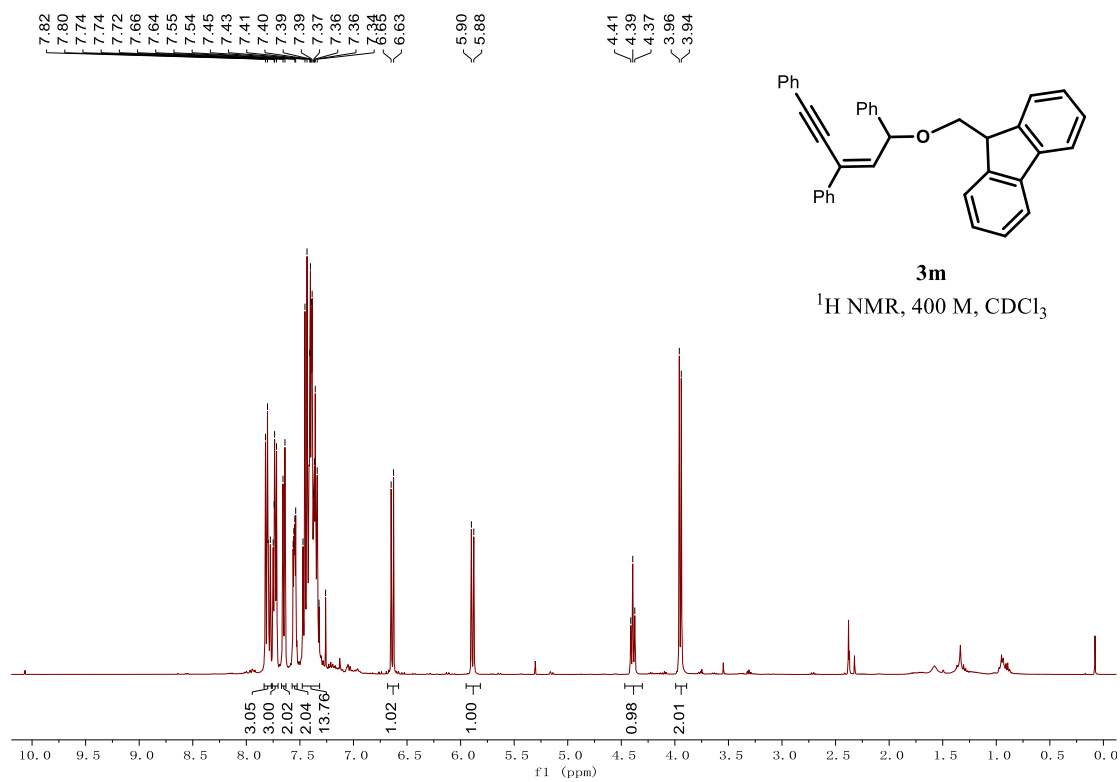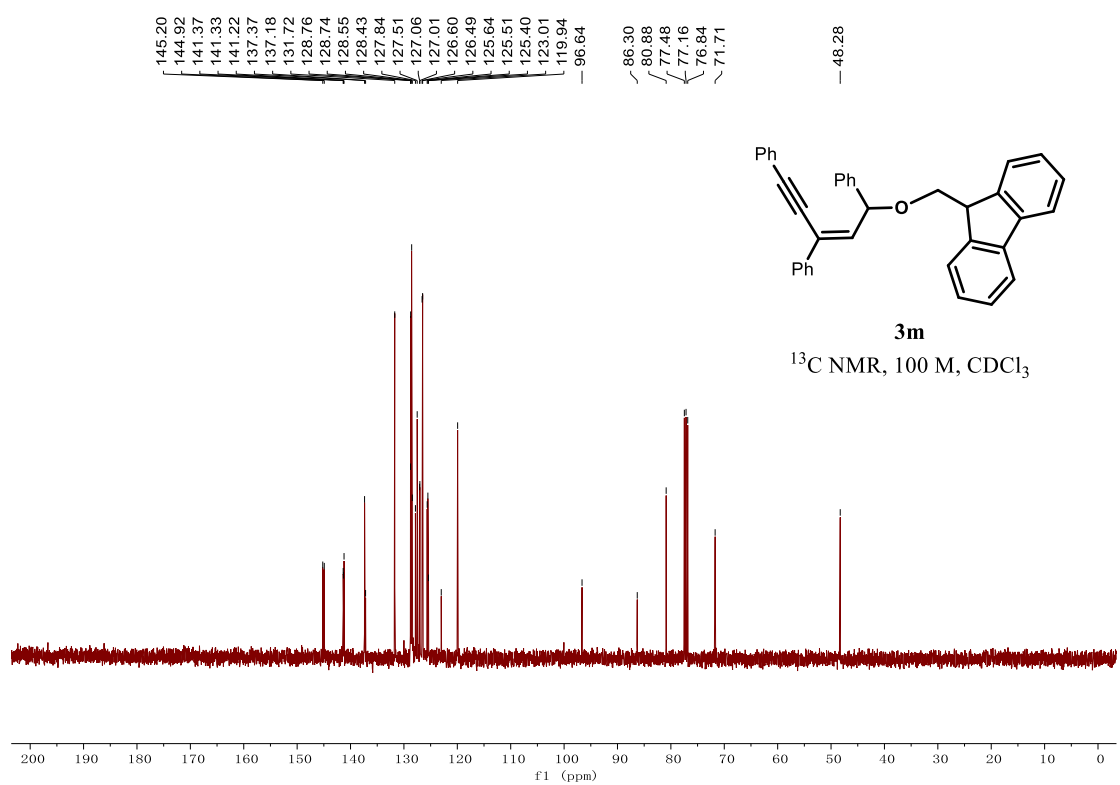

# HRMS spectrum

## Elemental Composition Report

Page 1

### Single Mass Analysis

Tolerance = 10.0 PPM / DBE: min = -1.5, max = 50.0

Element prediction: Off

Number of isotope peaks used for i-FIT = 3

Monoisotopic Mass, Even Electron Ions

13 formula(e) evaluated with 1 results within limits (all results (up to 1000) for each mass)

Elements Used:

C: 14-37 H: 1-60 O: 1-3 Na: 1-1

48

250511-2-62 16 (0.162)

1: TOF MS ES+  
2.35e+005

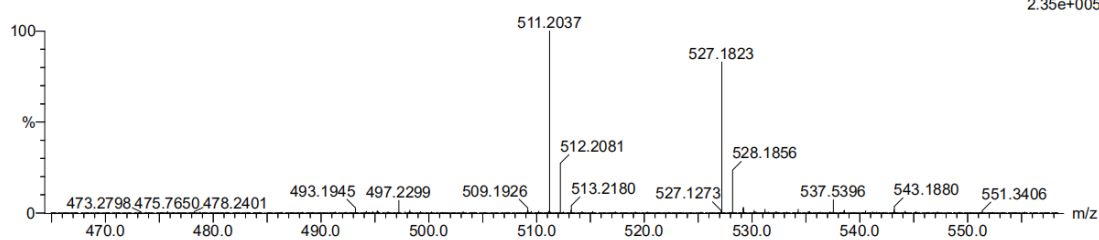

Minimum: -1.5  
Maximum: 5.0 10.0 50.0

| Mass     | Calc. Mass | mDa  | PPM  | DBE  | i-FIT | Norm | Conf (%) | Formula      |
|----------|------------|------|------|------|-------|------|----------|--------------|
| 511.2037 | 511.2038   | -0.1 | -0.2 | 23.5 | 663.7 | n/a  | n/a      | C37 H28 O Na |

7.75  
7.73  
7.63  
7.62  
7.61  
7.58  
7.56  
7.43  
7.42  
7.40  
7.38  
7.35  
7.33  
7.33  
7.31  
7.29  
7.26  
6.53  
6.51  
5.66  
5.64  
3.27  
3.24  
3.18  
3.16  
2.02  
1.78  
1.75  
1.72  
1.69  
1.67

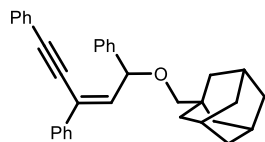

**3n**

<sup>1</sup>H NMR, 400 M, CDCl<sub>3</sub>

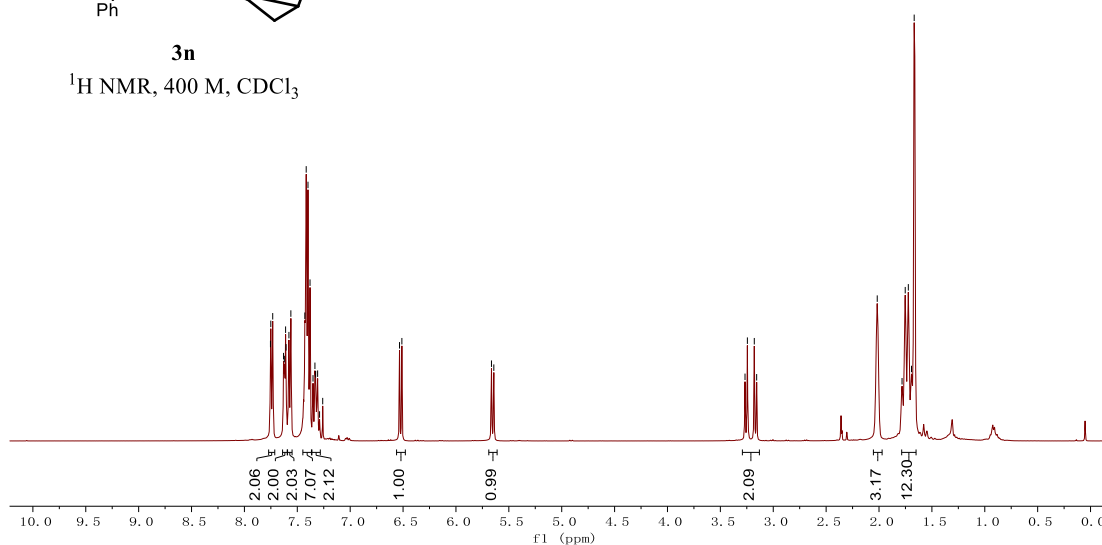

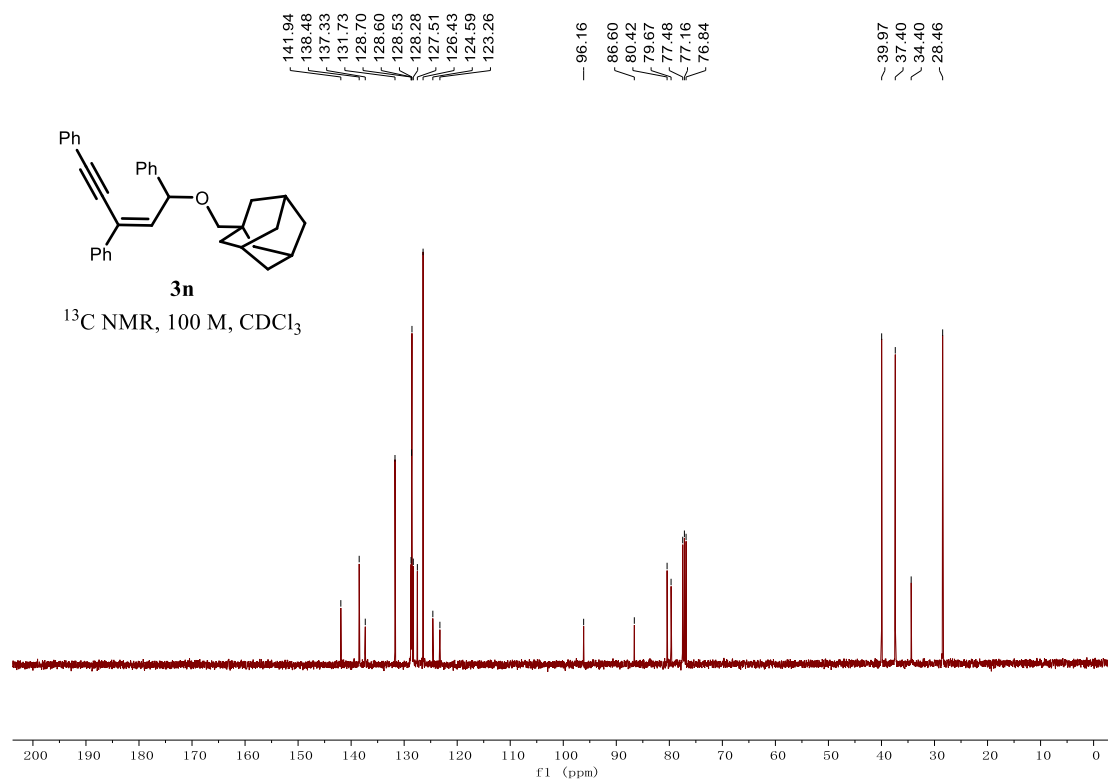

## HRMS spectrum

### Elemental Composition Report

Page 1

#### Single Mass Analysis

Tolerance = 10.0 PPM / DBE: min = -1.5, max = 50.0

Element prediction: Off

Number of isotope peaks used for i-FIT = 3

Monoisotopic Mass, Even Electron Ions

12 formula(e) evaluated with 1 results within limits (all results (up to 1000) for each mass)

Elements Used:

C: 34-34 H: 1-60 O: 1-12

48

250511-2-56 23 (0.230)

1: TOF MS ES+  
5.22e+002

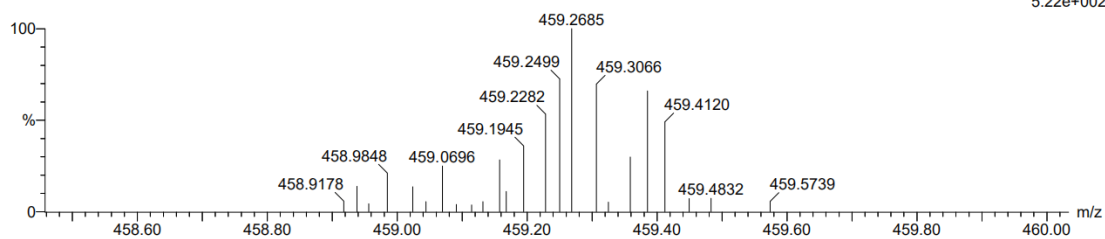

Minimum: -1.5  
Maximum: 5.0 10.0 50.0

| Mass     | Calc. Mass | mDa  | PPM  | DBE  | i-FIT | Norm | Conf (%) | Formula   |
|----------|------------|------|------|------|-------|------|----------|-----------|
| 459.2685 | 459.2688   | -0.3 | -0.7 | 17.5 | 95.4  | n/a  | n/a      | C34 H35 O |

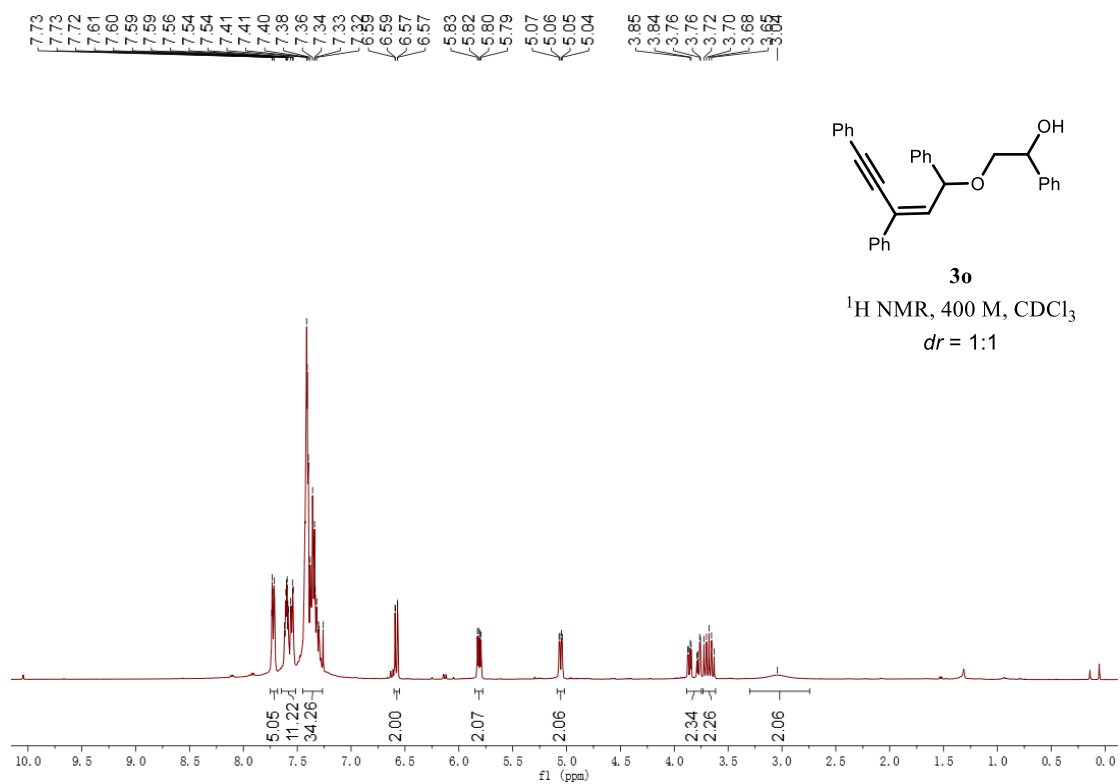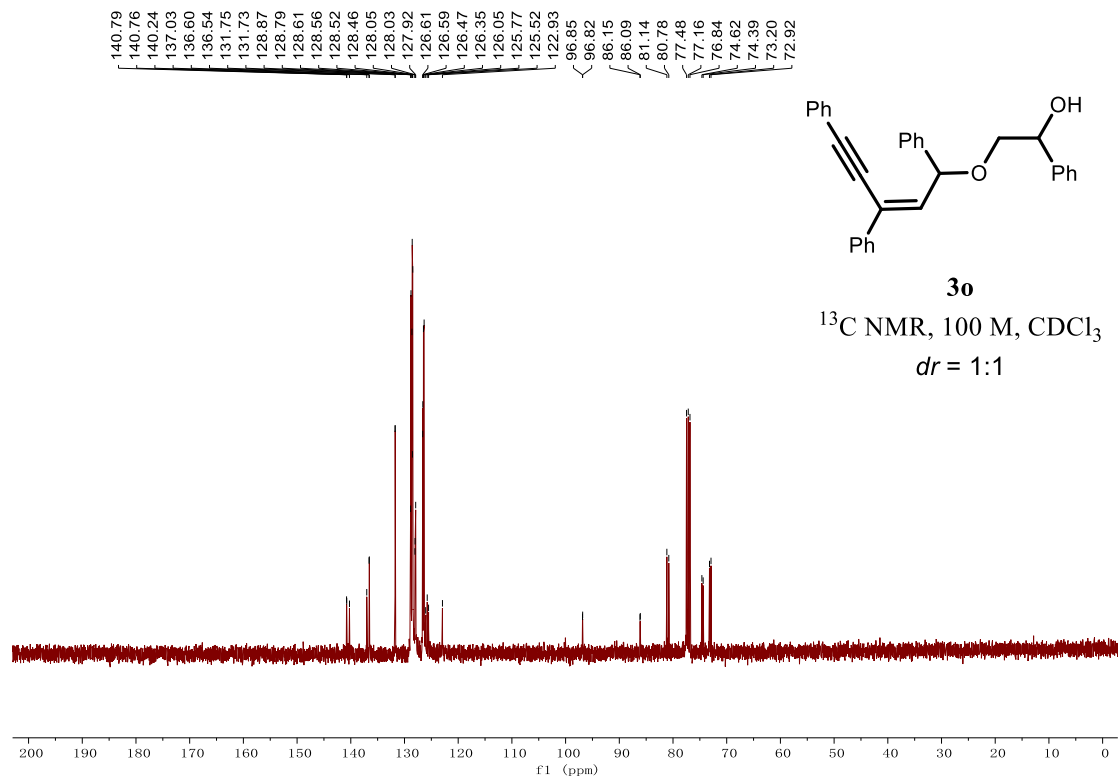

# HRMS spectrum

## Elemental Composition Report

Page 1

### Single Mass Analysis

Tolerance = 5.0 mDa / DBE: min = -1.5, max = 50.0

Element prediction: Off

Number of isotope peaks used for i-FIT = 3

Monoisotopic Mass, Even Electron Ions

1287 formula(e) evaluated with 1 results within limits (up to 50 closest results for each mass)

Elements Used:

C: 31-31 H: 26-26 N: 0-100 O: 0-100 Na: 0-2

7

250403-12-761-2-YQZ-31 16 (0.161)

1: TOF MS ES+  
8.61e+006

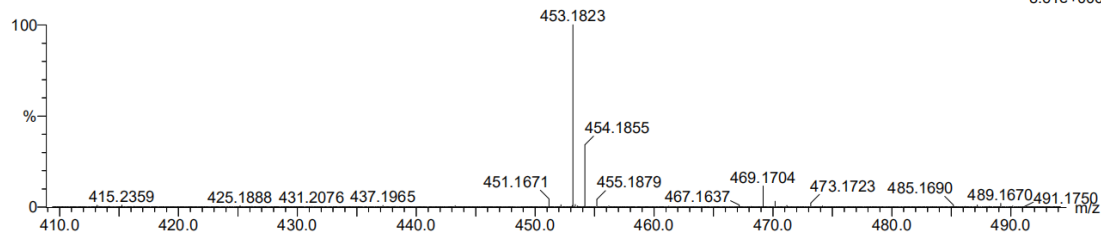

Minimum: -1.5  
Maximum: 50.0

| Mass     | Calc. Mass | mDa  | PPM  | DBE  | i-FIT  | Norm | Conf (%) | Formula       |
|----------|------------|------|------|------|--------|------|----------|---------------|
| 453.1823 | 453.1830   | -0.7 | -1.5 | 18.5 | 1112.4 | n/a  | n/a      | C31 H26 O2 Na |

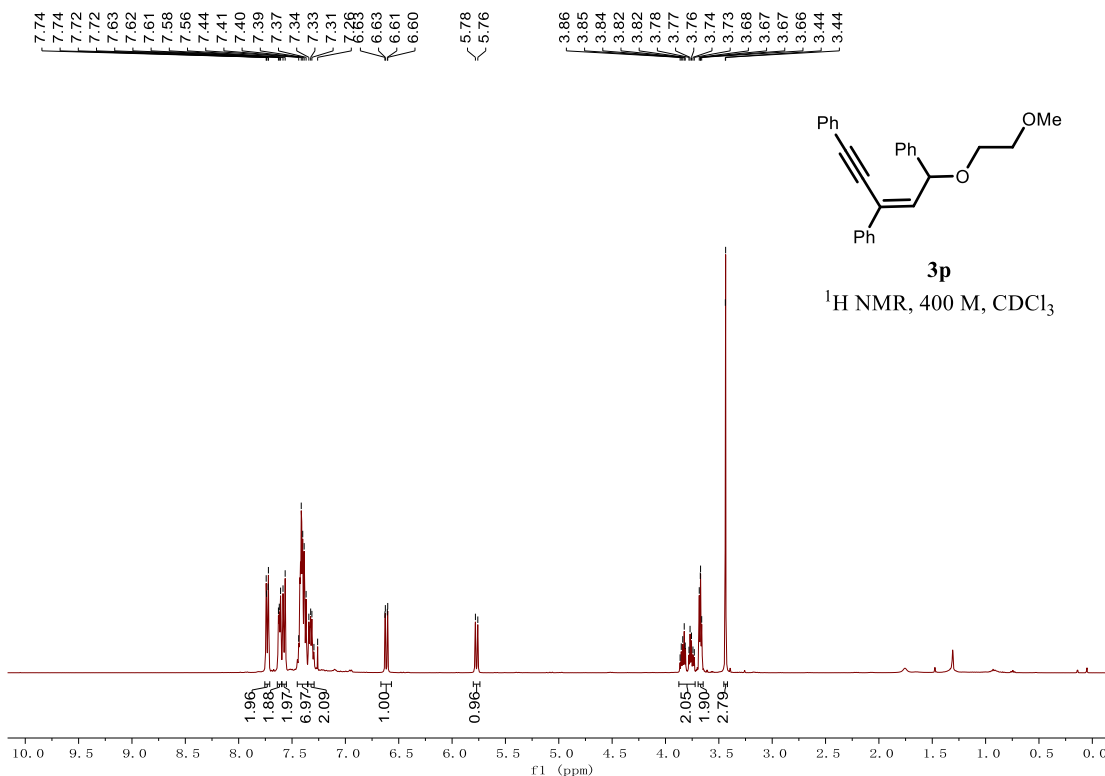

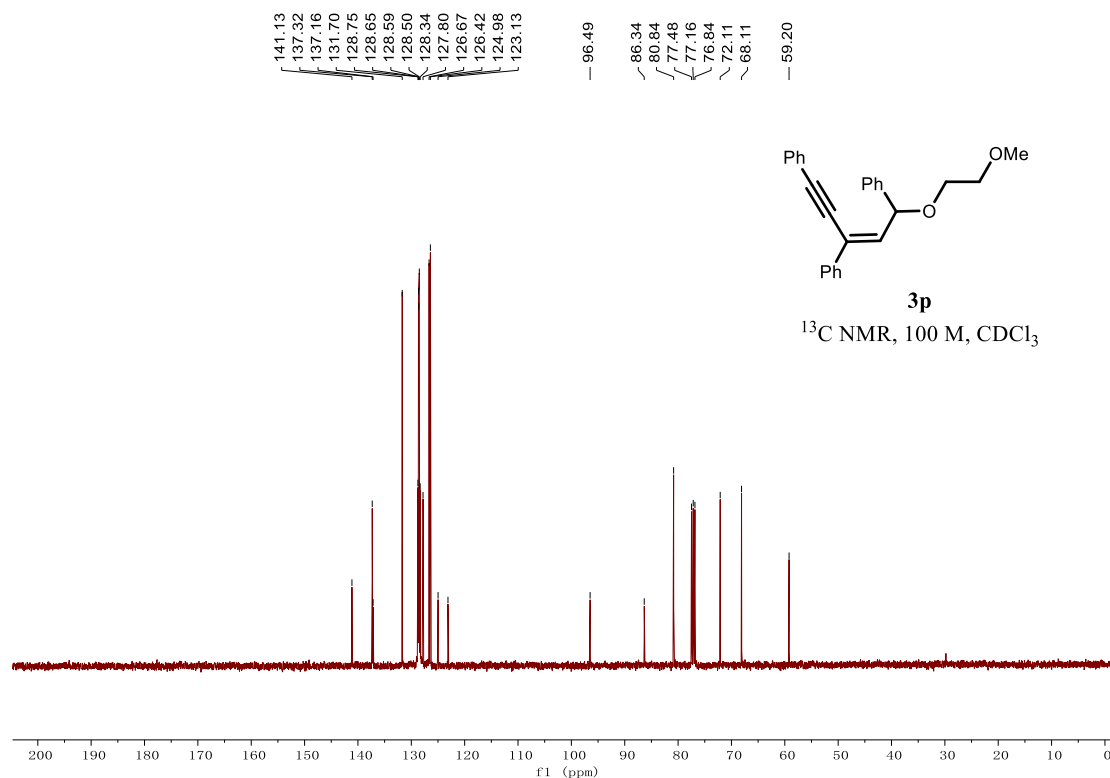

## HRMS spectrum

### Elemental Composition Report

Page 1

#### Single Mass Analysis

Tolerance = 10.0 PPM / DBE: min = -1.5, max = 50.0

Element prediction: Off

Number of isotope peaks used for i-FIT = 3

Monoisotopic Mass, Even Electron Ions

13 formula(e) evaluated with 1 results within limits (all results (up to 1000) for each mass)

Elements Used:

C: 14-37 H: 1-60 O: 1-3 Na: 1-1

48

250511-2-67 13 (0.137)

1: TOF MS ES+  
7.06e+006

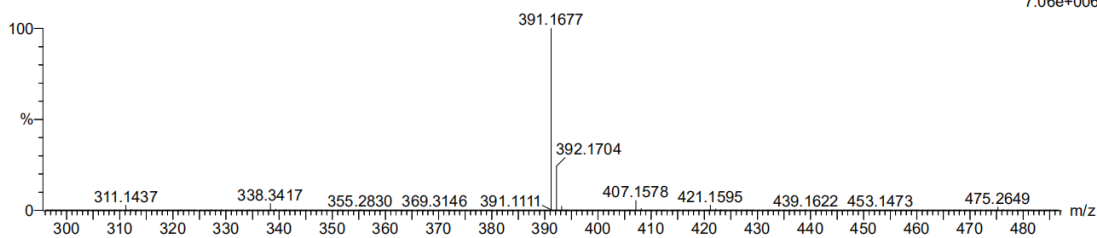

Minimum: -1.5  
Maximum: 5.0 10.0 50.0

| Mass     | Calc. Mass | mDa | PPM | DBE  | i-FIT  | Norm | Conf (%) | Formula                                           |
|----------|------------|-----|-----|------|--------|------|----------|---------------------------------------------------|
| 391.1677 | 391.1674   | 0.3 | 0.8 | 14.5 | 1045.4 | n/a  | n/a      | C <sub>26</sub> H <sub>24</sub> O <sub>2</sub> Na |

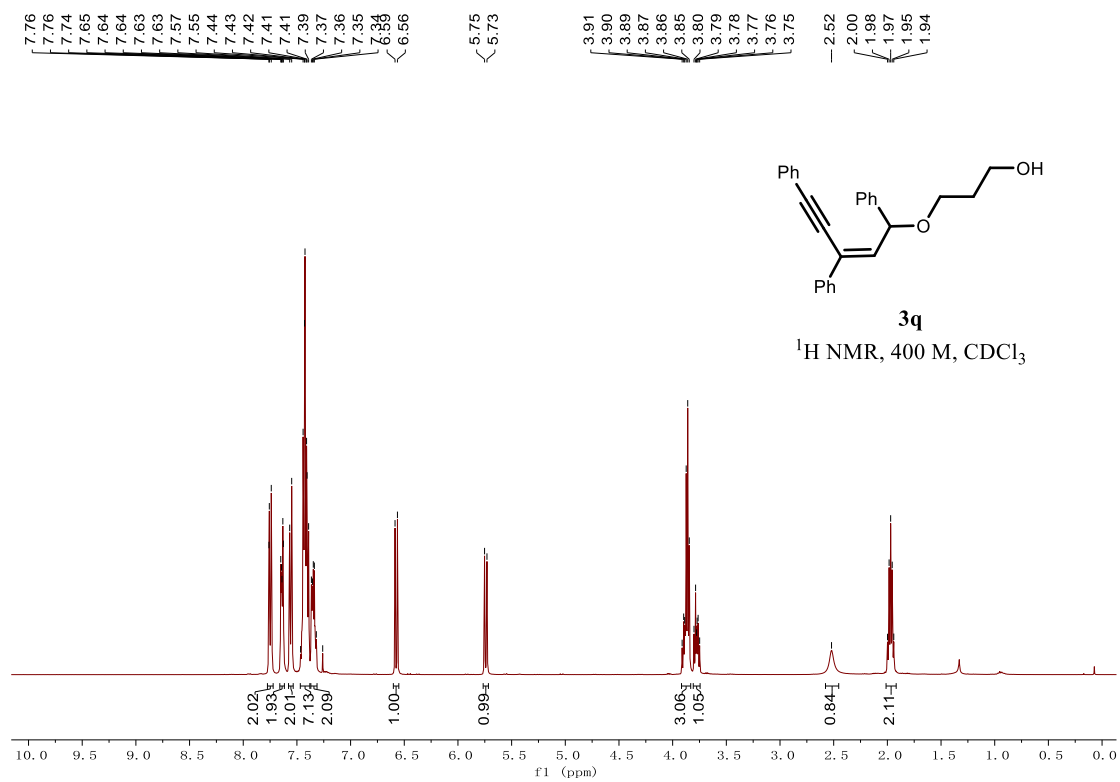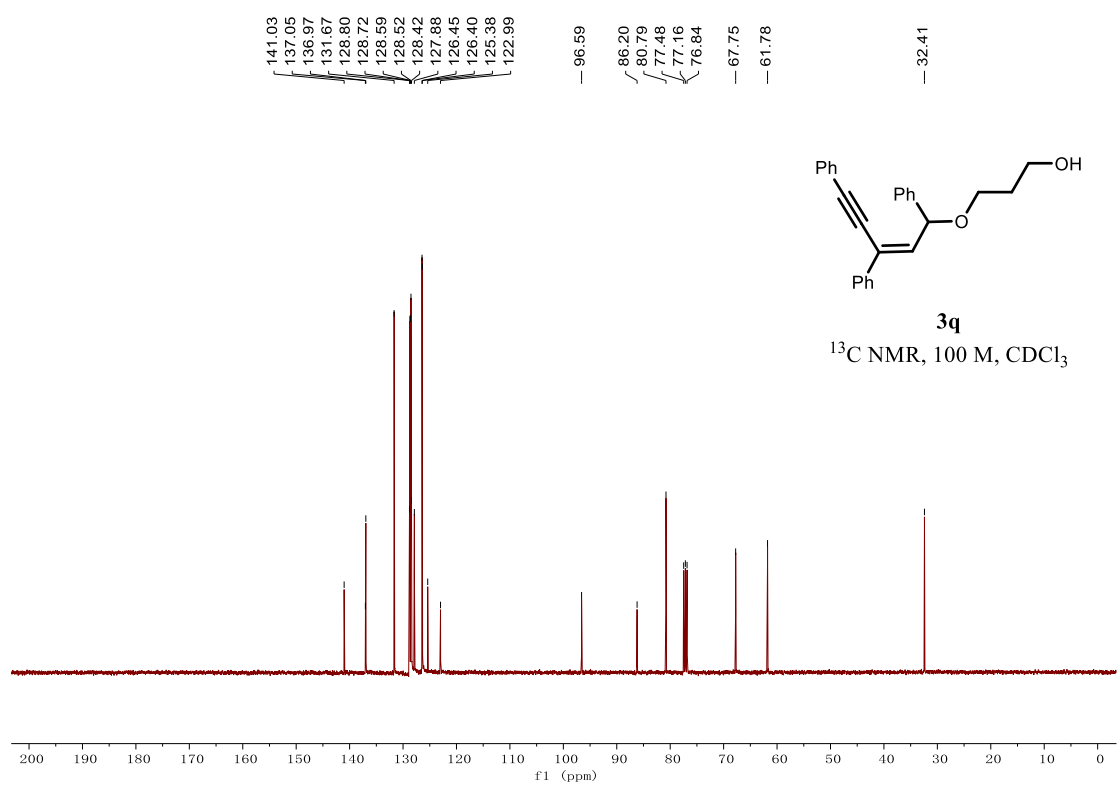

# HRMS spectrum

## Elemental Composition Report

Page 1

### Single Mass Analysis

Tolerance = 10.0 PPM / DBE: min = -1.5, max = 50.0

Element prediction: Off

Number of isotope peaks used for i-FIT = 3

Monoisotopic Mass, Even Electron Ions

16 formula(e) evaluated with 1 results within limits (all results (up to 1000) for each mass)

Elements Used:

C: 26-34 H: 1-60 O: 1-12 Na: 1-1

48

250511-2-66 12 (0.128)

1: TOF MS ES+  
1.49e+006

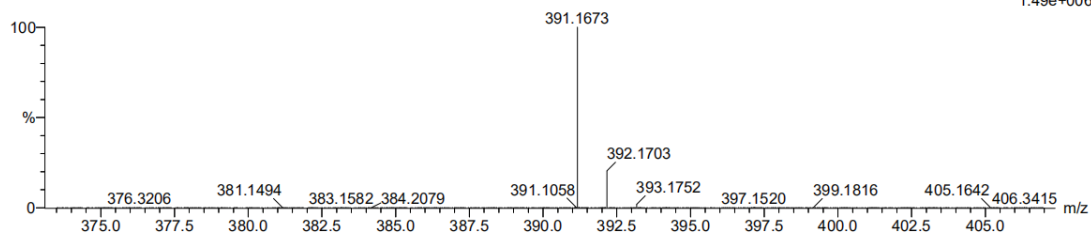

Minimum: -1.5  
Maximum: 5.0 10.0 50.0

| Mass     | Calc. Mass | mDa  | PPM  | DBE  | i-FIT | Norm | Conf (%) | Formula       |
|----------|------------|------|------|------|-------|------|----------|---------------|
| 391.1673 | 391.1674   | -0.1 | -0.3 | 14.5 | 902.8 | n/a  | n/a      | C26 H24 O2 Na |

7.75  
7.74  
7.73  
7.69  
7.67  
7.67  
7.46  
7.40  
7.38  
7.37  
7.36  
7.35  
7.34  
7.32  
7.31  
7.30  
7.28  
7.25  
7.24  
7.22  
7.20  
7.19  
6.84  
6.84  
6.51  
5.88  
5.85  
5.83  
5.61  
4.81  
4.79  
4.77  
4.76  
4.57  
4.56  
4.54  
4.54  
4.52  
1.54  
1.52  
1.51  
1.49

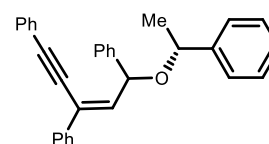

**3r**

<sup>1</sup>H NMR, 400 M, CDCl<sub>3</sub>

dr=1:1

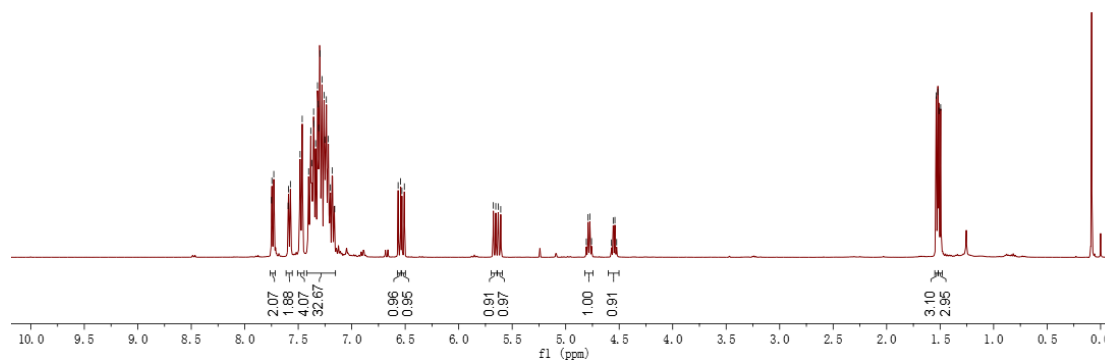

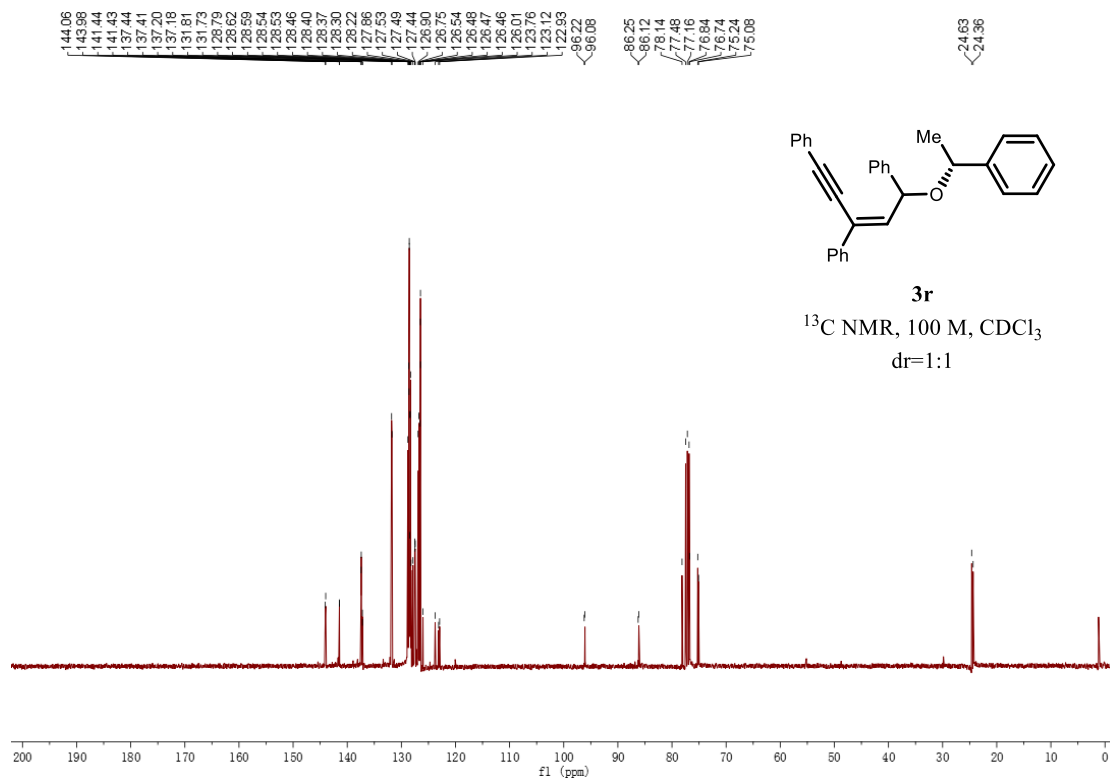

## HRMS spectrum

### Elemental Composition Report

Page 1

#### Single Mass Analysis

Tolerance = 5.0 mDa / DBE: min = -1.5, max = 50.0

Element prediction: Off

Number of isotope peaks used for i-FIT = 3

Monoisotopic Mass, Even Electron Ions

1208 formula(e) evaluated with 1 results within limits (up to 50 closest results for each mass)

Elements Used:

C: 31-31 H: 26-26 N: 0-100 O: 0-100 Na: 0-2

7

250403-12-761-2-YQZ-29 16 (0.161)

1: TOF MS ES+  
3.26e+006

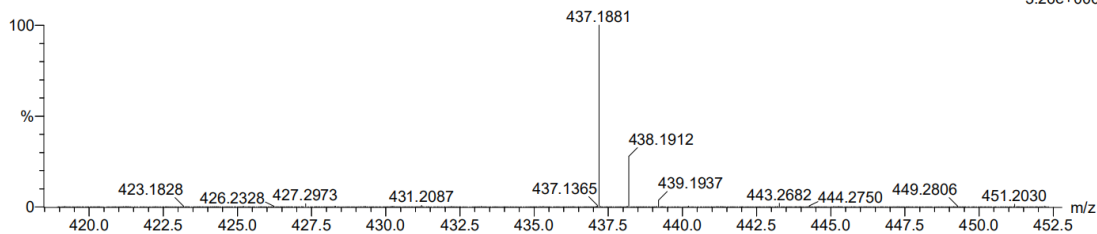

Minimum: -1.5  
Maximum: 5.0 10.0 50.0

| Mass     | Calc. Mass | mDa | PIM | DBE  | i-FIT  | Norm | Conf (%) | Formula                           |
|----------|------------|-----|-----|------|--------|------|----------|-----------------------------------|
| 437.1881 | 437.1881   | 0.0 | 0.0 | 18.5 | 1040.1 | n/a  | n/a      | C <sub>31</sub> H <sub>26</sub> O |

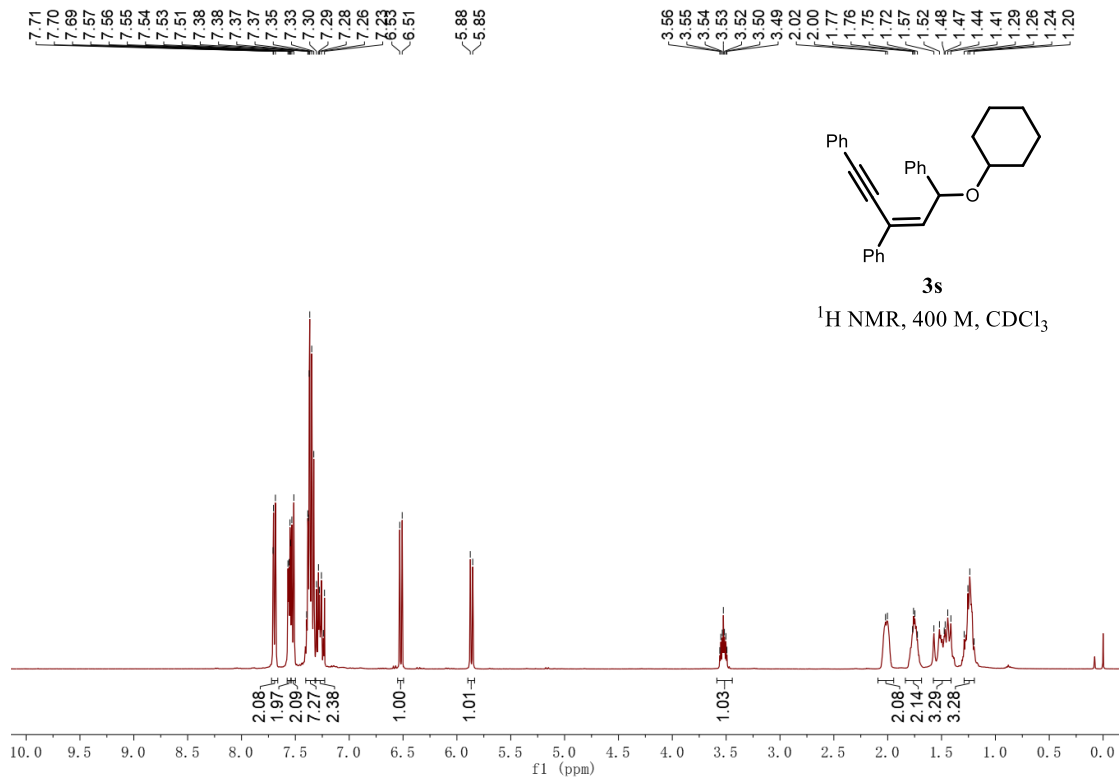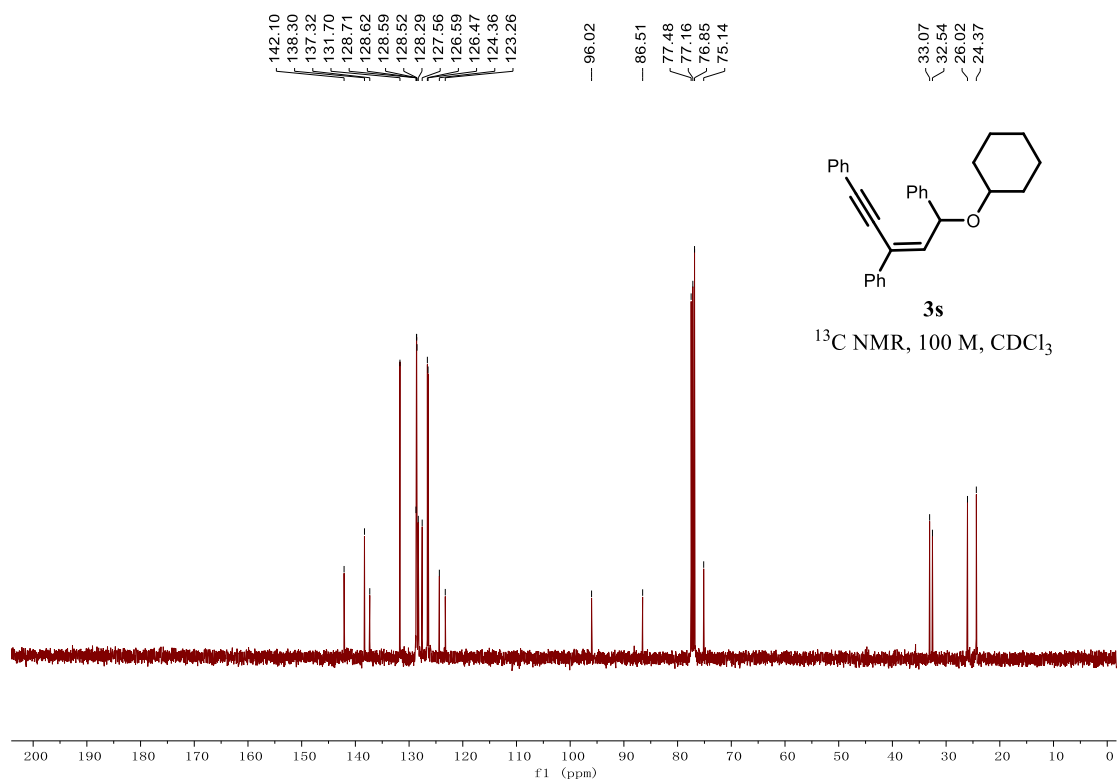

# HRMS spectrum

## Elemental Composition Report

Page 1

### Single Mass Analysis

Tolerance = 10.0 PPM / DBE: min = -1.5, max = 50.0

Element prediction: Off

Number of isotope peaks used for i-FIT = 3

Monoisotopic Mass, Even Electron Ions

5 formula(e) evaluated with 1 results within limits (all results (up to 1000) for each mass)

Elements Used:

C: 14-37 H: 1-60 O: 1-1

48

250511-2-69 4 (0.059)

1: TOF MS ES+  
5.38e+002

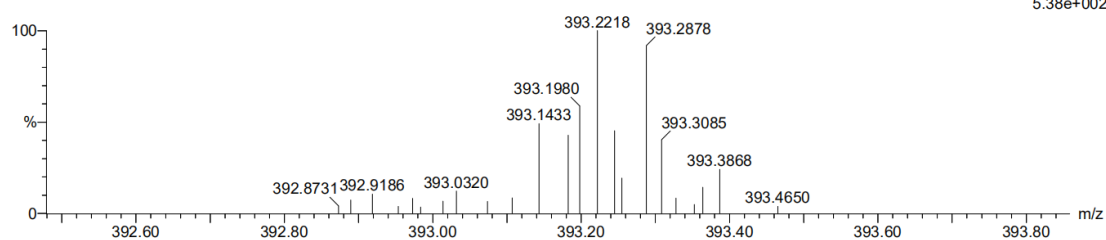

Minimum: -1.5  
Maximum: 5.0 10.0 50.0

| Mass     | Calc. Mass | mDa | PPM | DBE  | i-FIT | Norm | Conf (%) | Formula   |
|----------|------------|-----|-----|------|-------|------|----------|-----------|
| 393.2218 | 393.2218   | 0.0 | 0.0 | 15.5 | 104.7 | n/a  | n/a      | C29 H29 O |

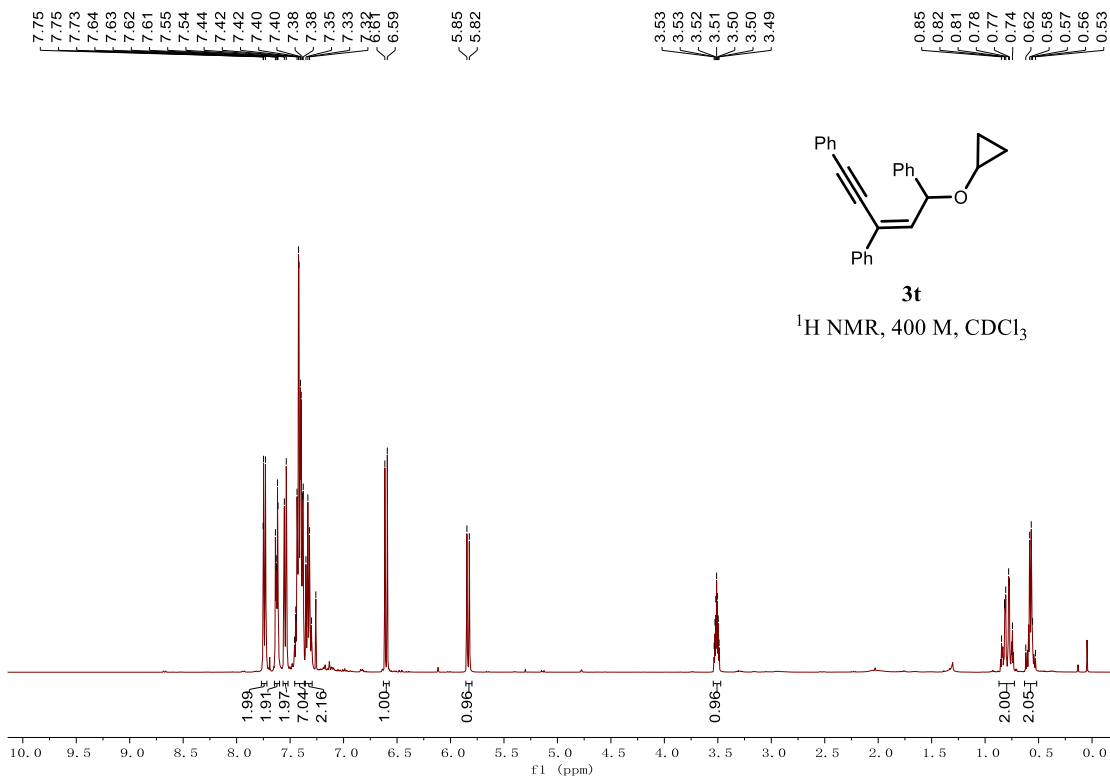

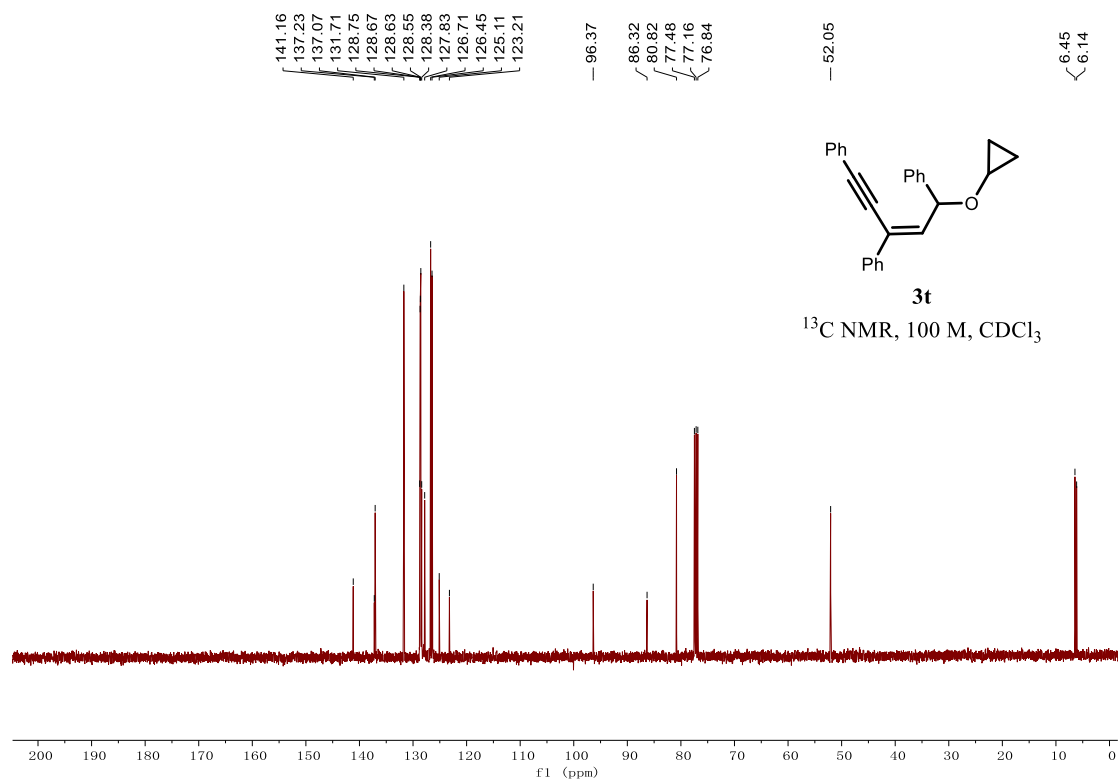

## HRMS spectrum

### Elemental Composition Report

Page 1

#### Single Mass Analysis

Tolerance = 10.0 PPM / DBE: min = -1.5, max = 50.0

Element prediction: Off

Number of isotope peaks used for i-FIT = 3

Monoisotopic Mass, Even Electron Ions

14 formula(e) evaluated with 1 results within limits (all results (up to 1000) for each mass)

Elements Used:

C: 14-31 H: 1-60 O: 1-3 Na: 1-1

48

250511-2-58 50 (0.470)

1: TOF MS ES+  
3.51e+002

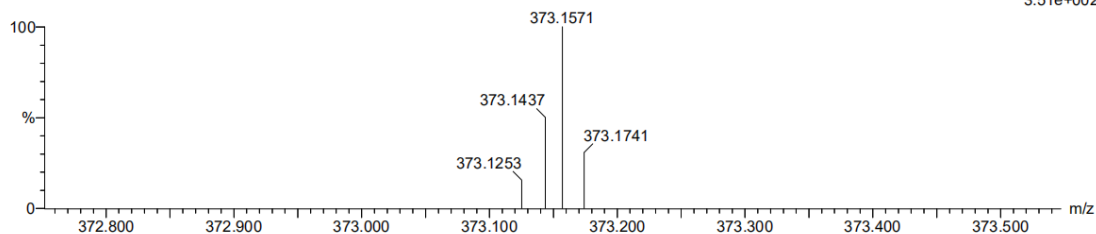

Minimum: -1.5  
Maximum: 5.0 10.0 50.0

| Mass     | Calc. Mass | mDa | PPM | DBE  | i-FIT | Norm | Conf (%) | Formula                              |
|----------|------------|-----|-----|------|-------|------|----------|--------------------------------------|
| 373.1571 | 373.1568   | 0.3 | 0.8 | 15.5 | 30.7  | n/a  | n/a      | C <sub>26</sub> H <sub>22</sub> O Na |

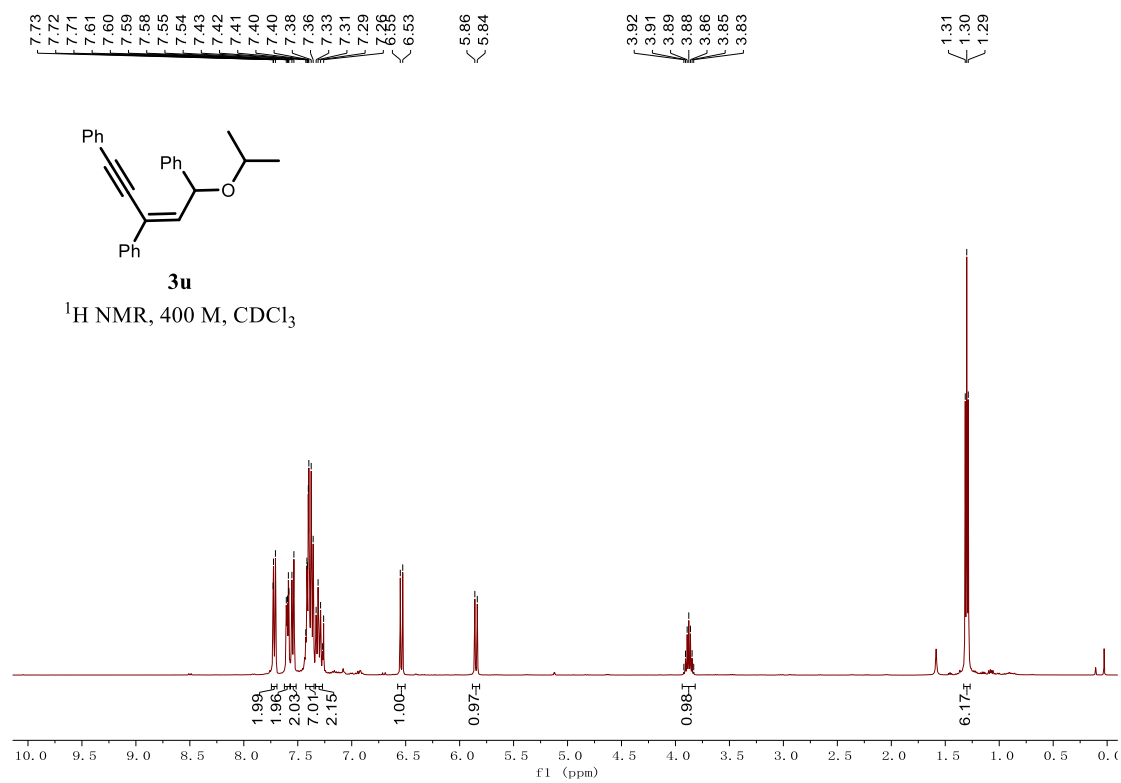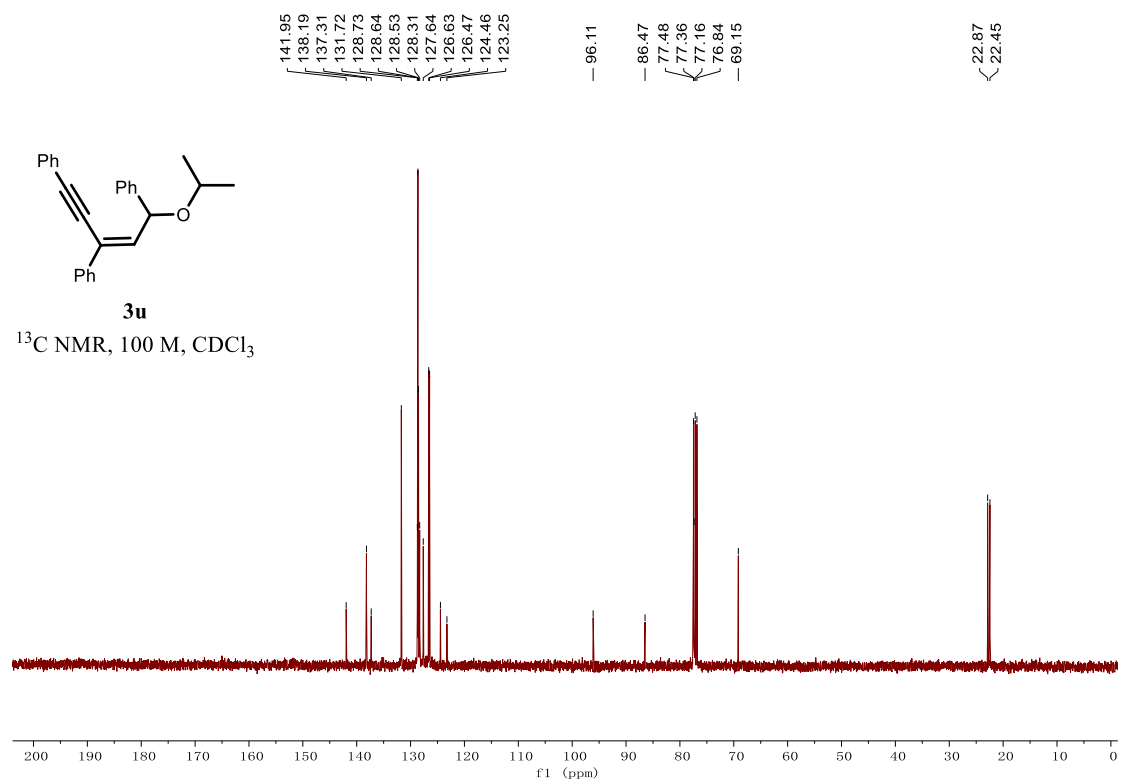

# HRMS spectrum

## Elemental Composition Report

Page 1

### Single Mass Analysis

Tolerance = 10.0 PPM / DBE: min = -1.5, max = 50.0

Element prediction: Off

Number of isotope peaks used for i-FIT = 3

Monoisotopic Mass, Even Electron Ions

13 formula(e) evaluated with 1 results within limits (all results (up to 1000) for each mass)

Elements Used:

C: 14-31 H: 1-60 O: 1-3 Na: 1-1

48

250511-2-60 51 (0.479)

1: TOF MS ES+  
1.14e+002

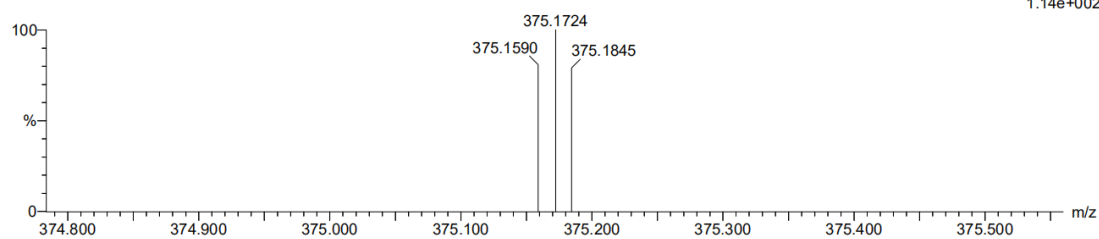

Minimum: -1.5  
Maximum: 50.0

| Mass     | Calc. Mass | mDa  | PPM  | DBE  | i-FIT | Norm | Conf (%) | Formula                              |
|----------|------------|------|------|------|-------|------|----------|--------------------------------------|
| 375.1724 | 375.1725   | -0.1 | -0.3 | 14.5 | 27.4  | n/a  | n/a      | C <sub>26</sub> H <sub>24</sub> O Na |

7.75  
7.74  
7.73  
7.59  
7.58  
7.57  
7.57  
7.53  
7.51  
7.44  
7.44  
7.43  
7.42  
7.41  
7.41  
7.40  
7.39  
7.38  
7.37  
6.50  
6.50  
6.19  
6.17  
4.53  
4.52  
4.50  
4.49  
4.47

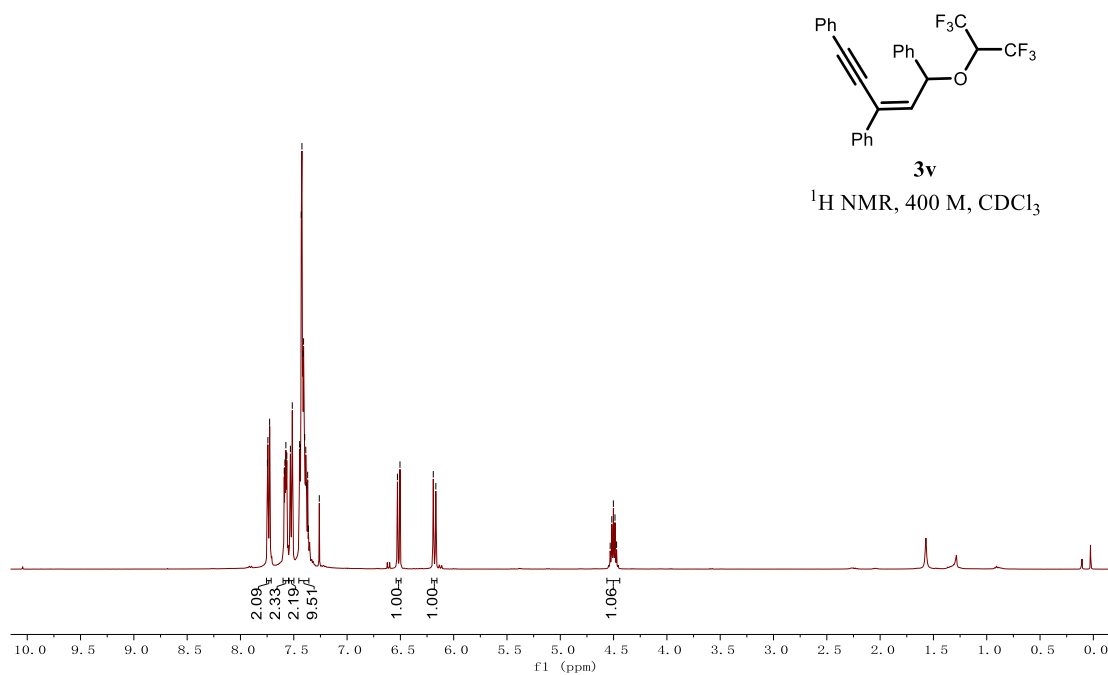

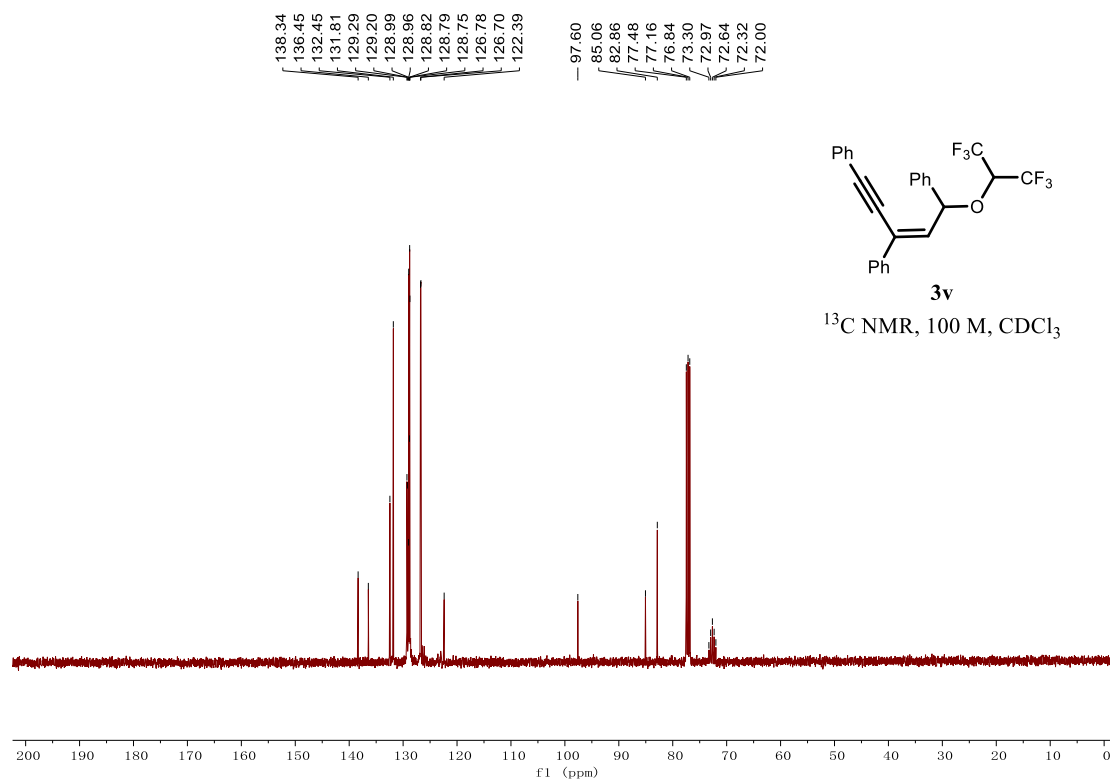

## HRMS spectrum

### Elemental Composition Report

Page 1

#### Single Mass Analysis

Tolerance = 10.0 PPM / DBE: min = -1.5, max = 50.0

Element prediction: Off

Number of isotope peaks used for i-FIT = 3

Monoisotopic Mass, Even Electron Ions

4 formula(e) evaluated with 1 results within limits (all results (up to 1000) for each mass)

Elements Used:

C: 14-37 H: 1-60 O: 1-1 F: 6-6

48

250511-2-68 19 (0.196)

1: TOF MS ES+  
2.19e+002

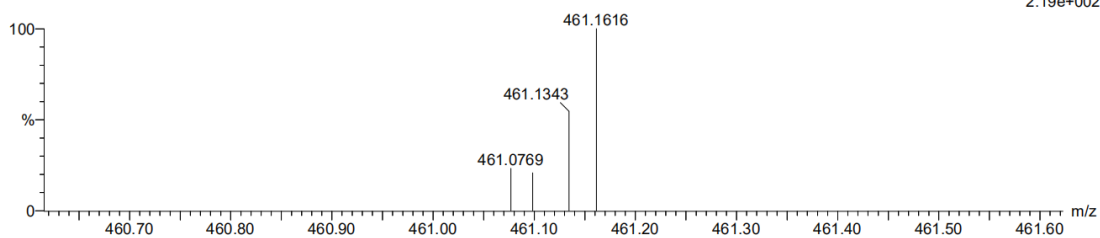

Minimum: -1.5  
Maximum: 5.0 10.0 50.0

| Mass     | Calc. Mass | mDa | PPM | DBE  | i-FIT | Norm | Conf(%) | Formula                                          |
|----------|------------|-----|-----|------|-------|------|---------|--------------------------------------------------|
| 461.1343 | 461.1340   | 0.3 | 0.7 | 14.5 | 29.5  | n/a  | n/a     | C <sub>26</sub> H <sub>19</sub> O F <sub>6</sub> |

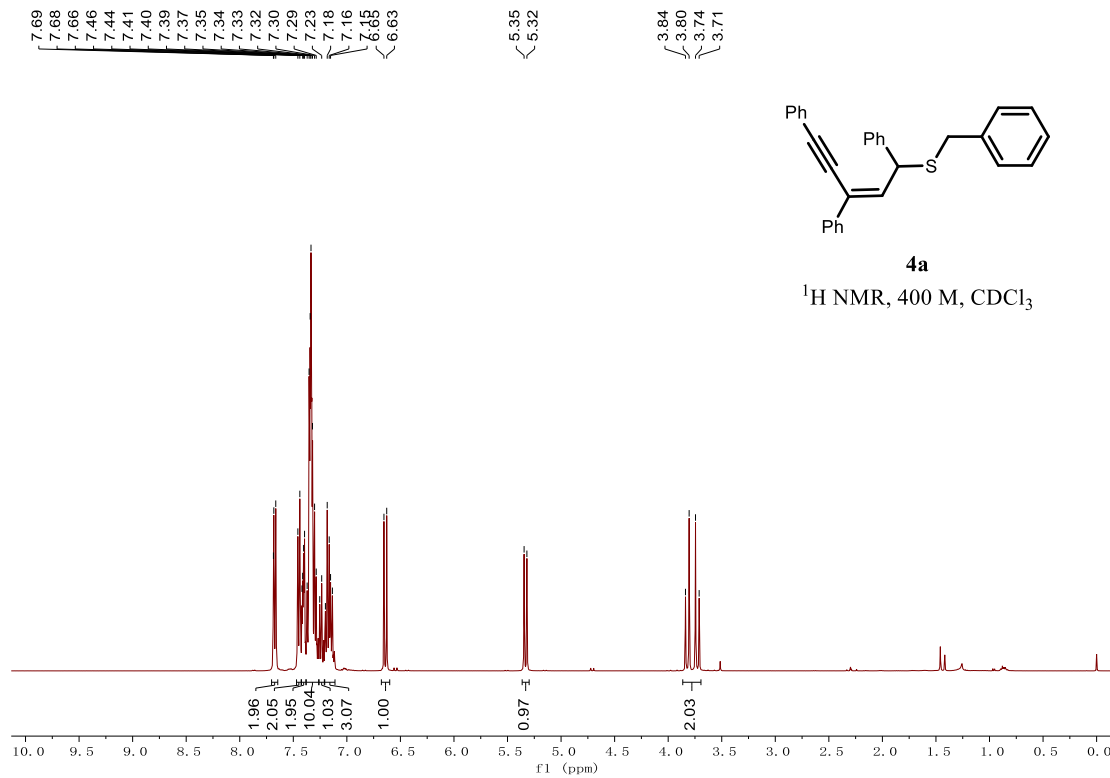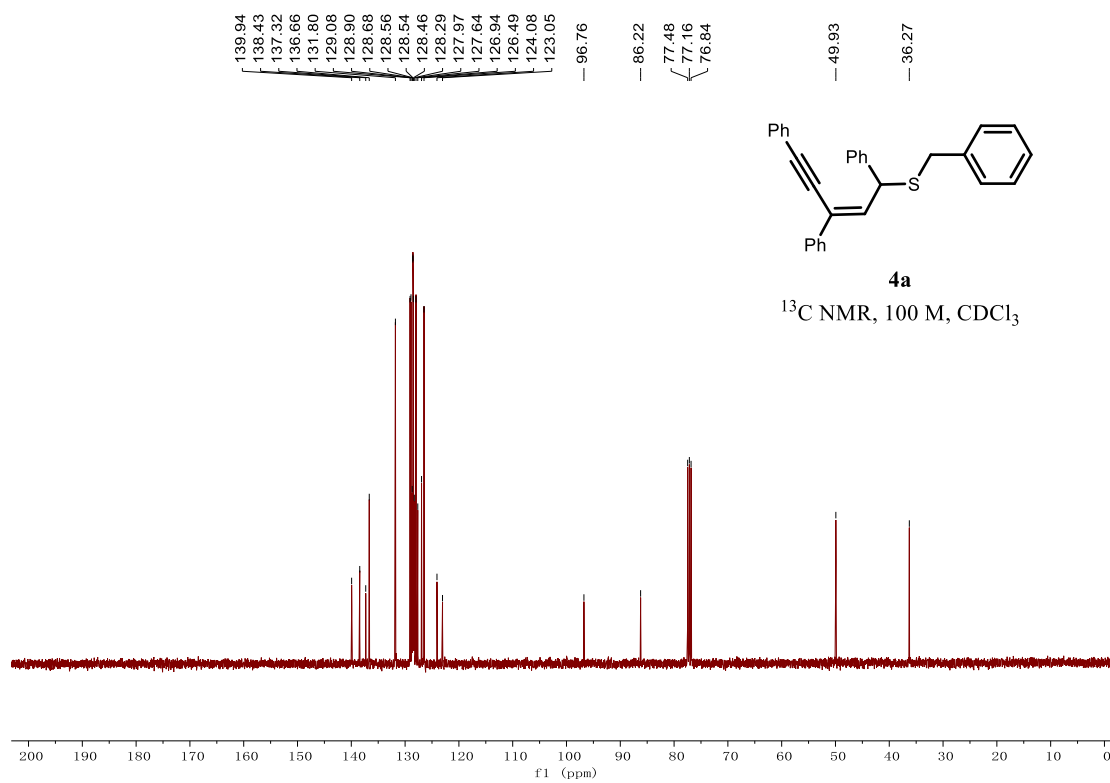

# HRMS spectrum

## Elemental Composition Report

Page 1

### Single Mass Analysis

Tolerance = 10.0 PPM / DBE: min = -1.5, max = 50.0

Element prediction: Off

Number of isotope peaks used for i-FIT = 3

Monoisotopic Mass, Even Electron Ions

5 formula(e) evaluated with 1 results within limits (all results (up to 1000) for each mass)

Elements Used:

C: 14-37 H: 1-60 S: 1-1

48

250511-2-63 9 (0.102)

1: TOF MS ES+  
7.41e+004

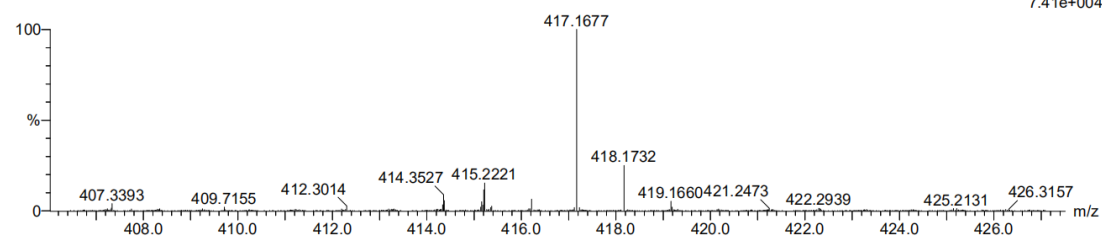

Minimum: -1.5  
Maximum: 5.0 10.0 50.0

| Mass     | Calc. Mass | mDa | PPM | DBE  | i-FIT | Norm | Conf (%) | Formula   |
|----------|------------|-----|-----|------|-------|------|----------|-----------|
| 417.1677 | 417.1677   | 0.0 | 0.0 | 18.5 | 775.3 | n/a  | n/a      | C30 H25 S |

7.79  
7.78  
7.76  
7.55  
7.53  
7.50  
7.49  
7.49  
7.47  
7.45  
7.43  
7.42  
7.41  
7.39  
7.38  
7.36  
7.34  
7.32  
6.81  
6.80  
6.79  
6.75  
6.72

5.41  
5.39

3.89  
3.85  
3.80  
3.76  
3.73

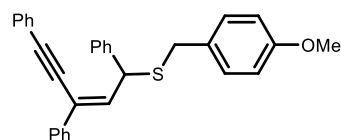

4b

<sup>1</sup>H NMR, 400 M, CDCl<sub>3</sub>

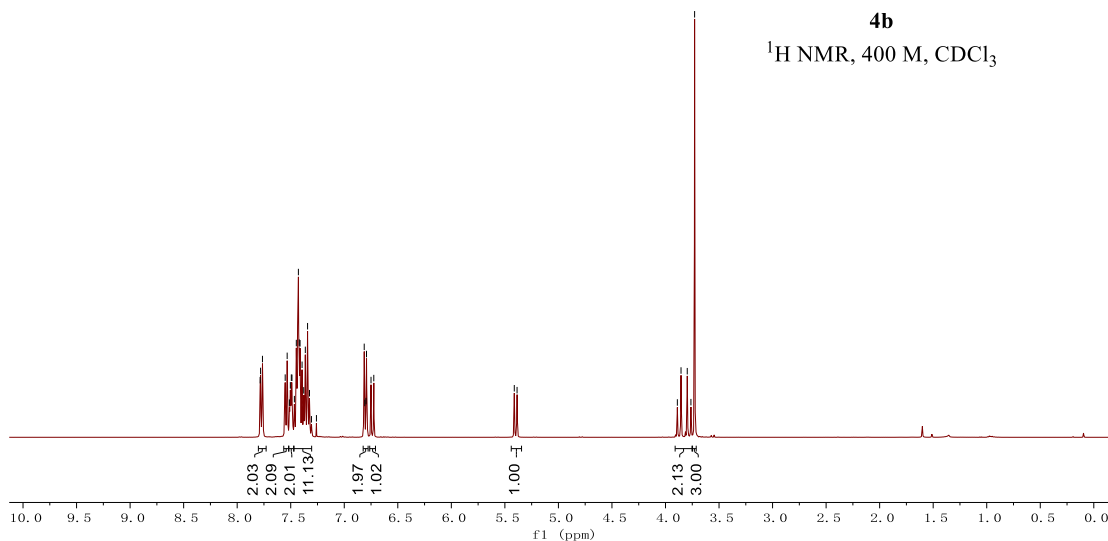

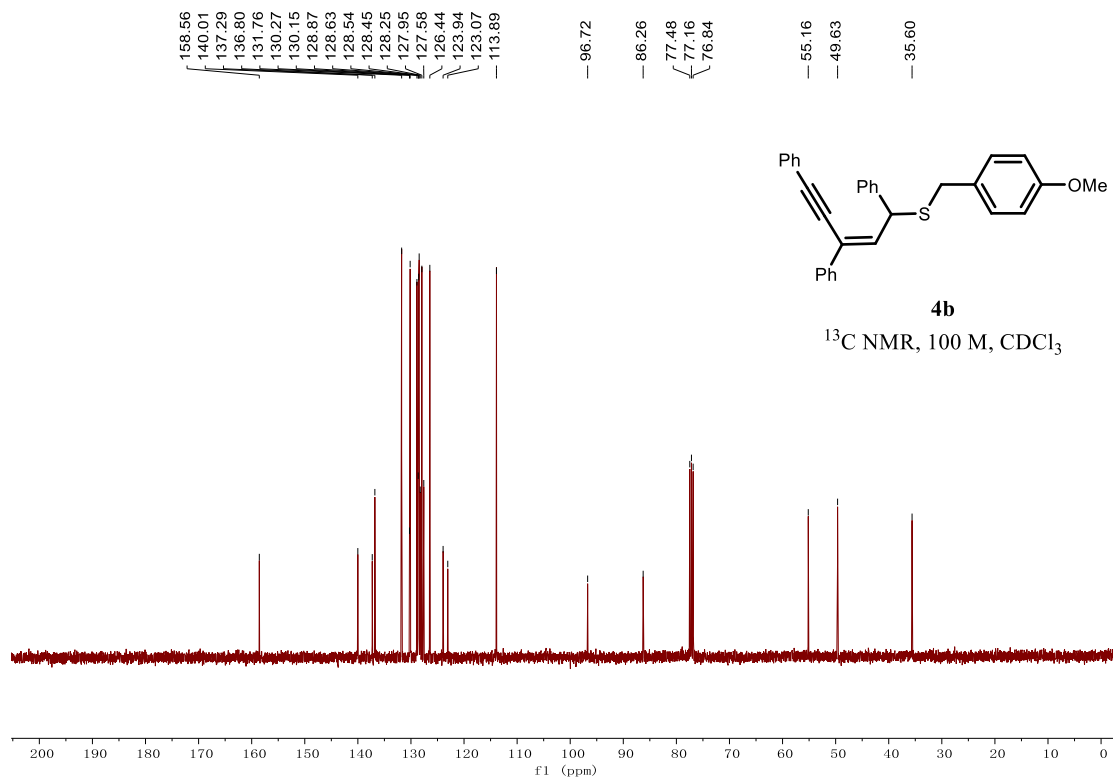

## HRMS spectrum

### Elemental Composition Report

Page 1

#### Single Mass Analysis

Tolerance = 10.0 PPM / DBE: min = -1.5, max = 50.0

Element prediction: Off

Number of isotope peaks used for i-FIT = 3

Monoisotopic Mass, Even Electron Ions

15 formula(e) evaluated with 1 results within limits (all results (up to 1000) for each mass)

Elements Used:

C: 14-37 H: 1-60 O: 1-3 Na: 1-1 S: 1-1

48

250511-2-65 10 (0.111)

1: TOF MS ES+  
8.82e+002

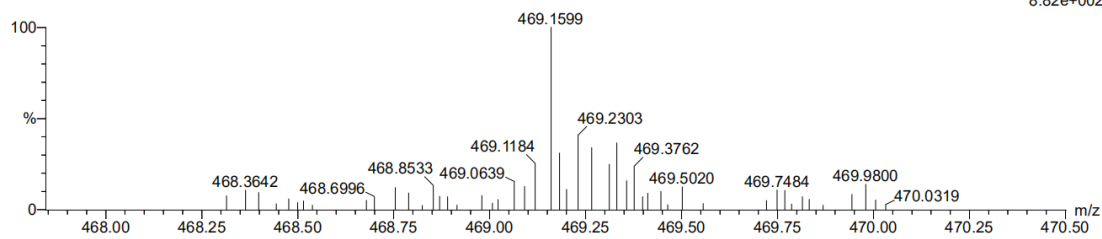

Minimum: -1.5  
Maximum: 5.0 10.0 50.0

| Mass     | Calc. Mass | mDa  | PPM  | DBE  | i-FIT | Norm | Conf(%) | Formula        |
|----------|------------|------|------|------|-------|------|---------|----------------|
| 469.1599 | 469.1602   | -0.3 | -0.6 | 18.5 | 245.8 | n/a  | n/a     | C31 H26 O Na S |

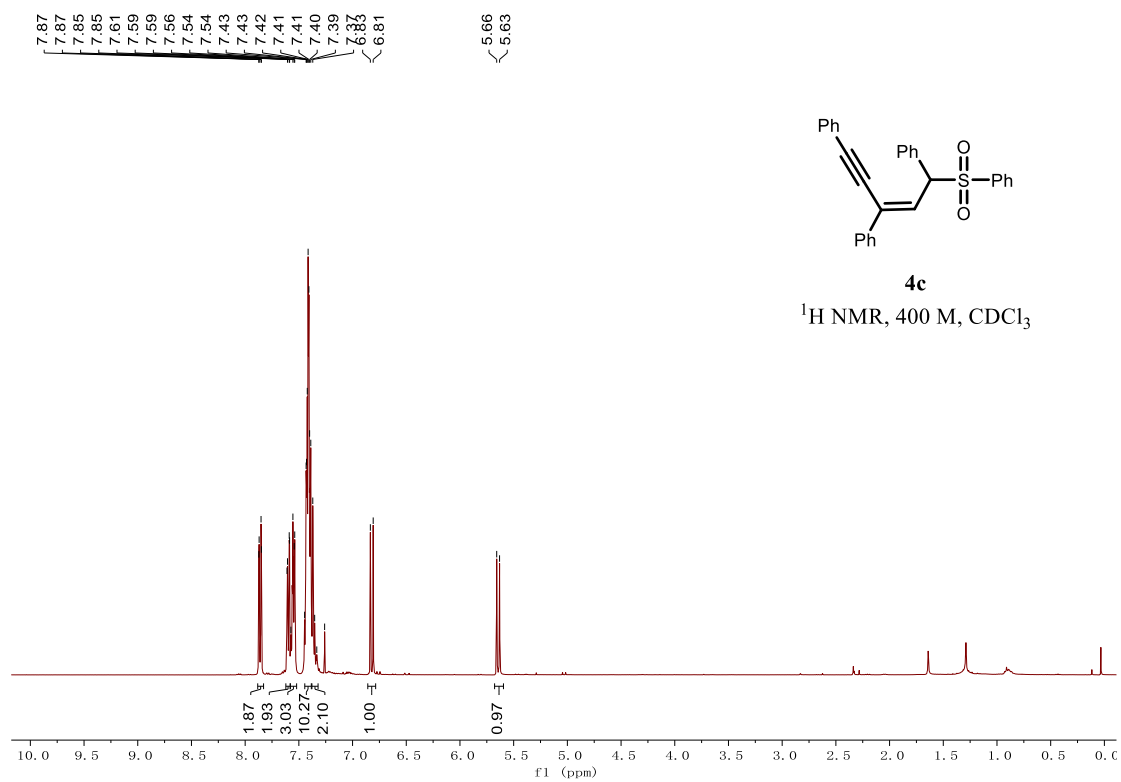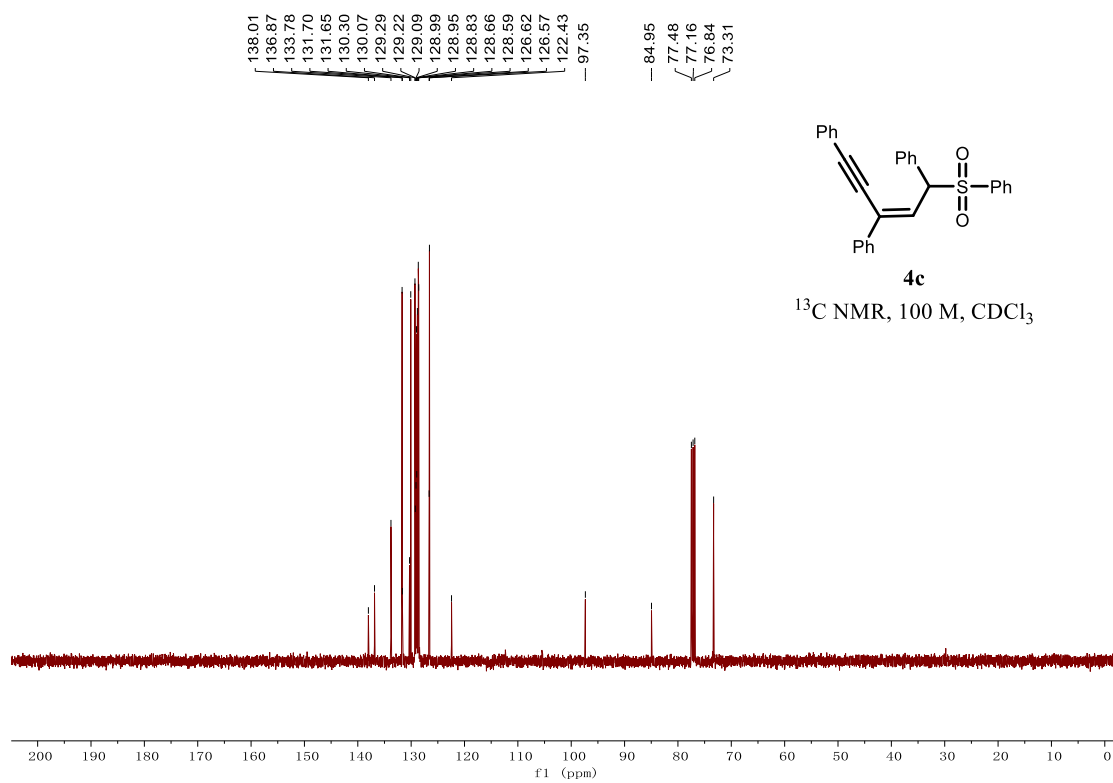

# HRMS spectrum

## Elemental Composition Report

Page 1

### Single Mass Analysis

Tolerance = 10.0 PPM / DBE: min = -1.5, max = 50.0

Element prediction: Off

Number of isotope peaks used for i-FIT = 3

Monoisotopic Mass, Even Electron Ions

15 formula(e) evaluated with 1 results within limits (all results (up to 1000) for each mass)

Elements Used:

C: 14-37 H: 1-60 O: 1-3 S: 1-1 Na: 1-1

48

250511-2-64 13 (0.137)

1: TOF MS ES+  
2.15e+005

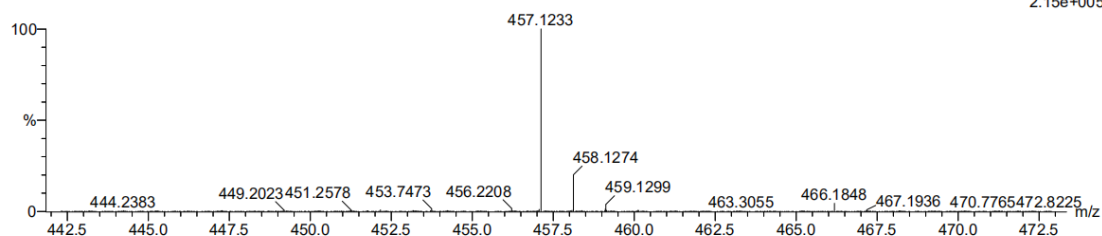

Minimum: -1.5  
Maximum: 5.0 10.0 50.0

| Mass     | Calc. Mass | mDa  | PPM  | DBE  | i-FIT | Norm | Conf (%) | Formula                                             |
|----------|------------|------|------|------|-------|------|----------|-----------------------------------------------------|
| 457.1233 | 457.1238   | -0.5 | -1.1 | 18.5 | 755.4 | n/a  | n/a      | C <sub>29</sub> H <sub>22</sub> O <sub>2</sub> S Na |

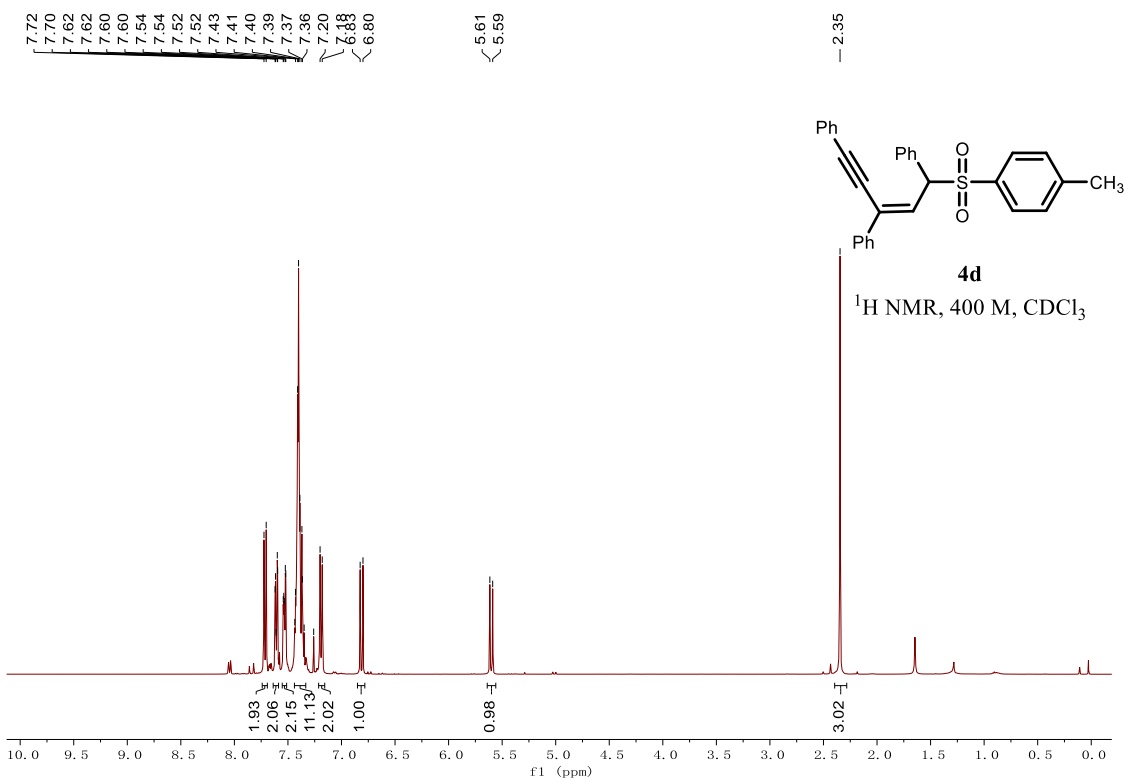

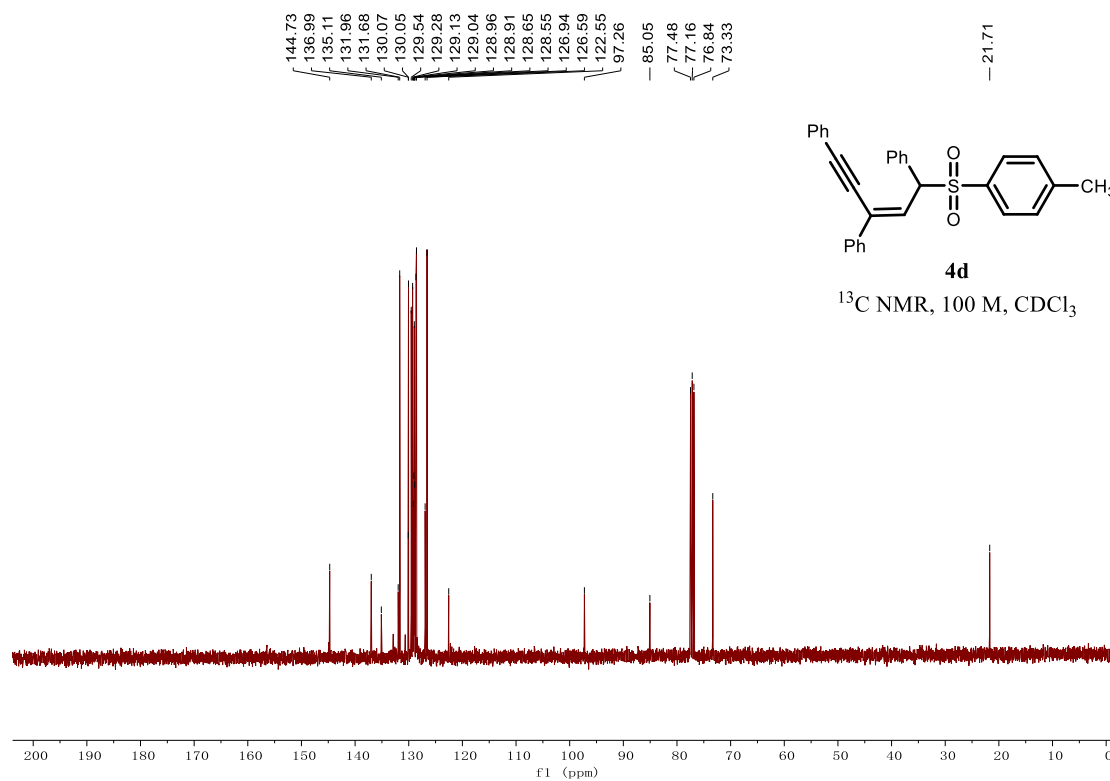

## HRMS spectrum

### Elemental Composition Report

Page 1

#### Single Mass Analysis

Tolerance = 10.0 PPM / DBE: min = -1.5, max = 50.0

Element prediction: Off

Number of isotope peaks used for i-FIT = 3

Monoisotopic Mass, Even Electron Ions

12 formula(e) evaluated with 1 results within limits (all results (up to 1000) for each mass)

Elements Used:

C: 14-31 H: 1-60 O: 1-3 S: 1-1

48

250511-2-61 29 (0.282)

1: TOF MS ES+  
4.62e+002

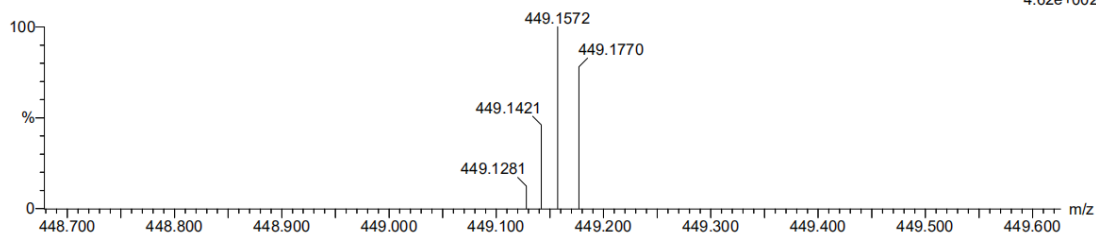

Minimum: -1.5  
Maximum: 5.0 10.0 50.0

| Mass     | Calc. Mass | mDa  | PPM  | DBE  | i-FIT | Norm | Conf (%) | Formula                                          |
|----------|------------|------|------|------|-------|------|----------|--------------------------------------------------|
| 449.1572 | 449.1575   | -0.3 | -0.7 | 18.5 | 34.1  | n/a  | n/a      | C <sub>30</sub> H <sub>25</sub> O <sub>2</sub> S |

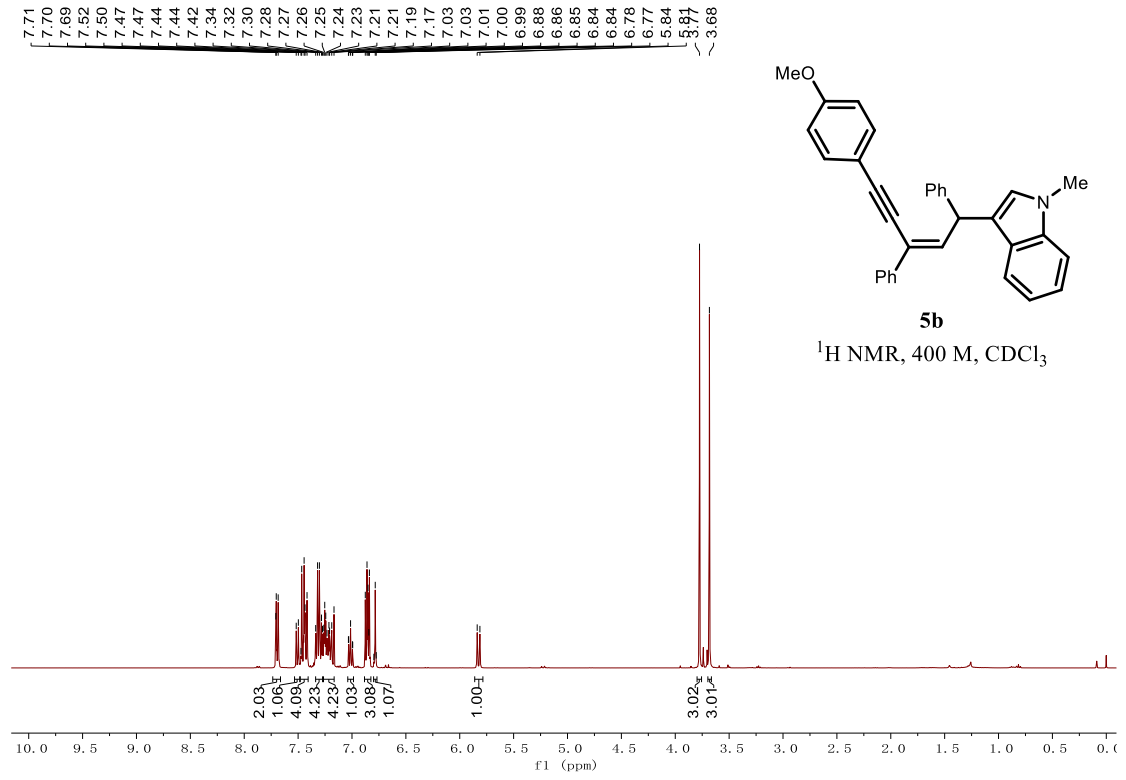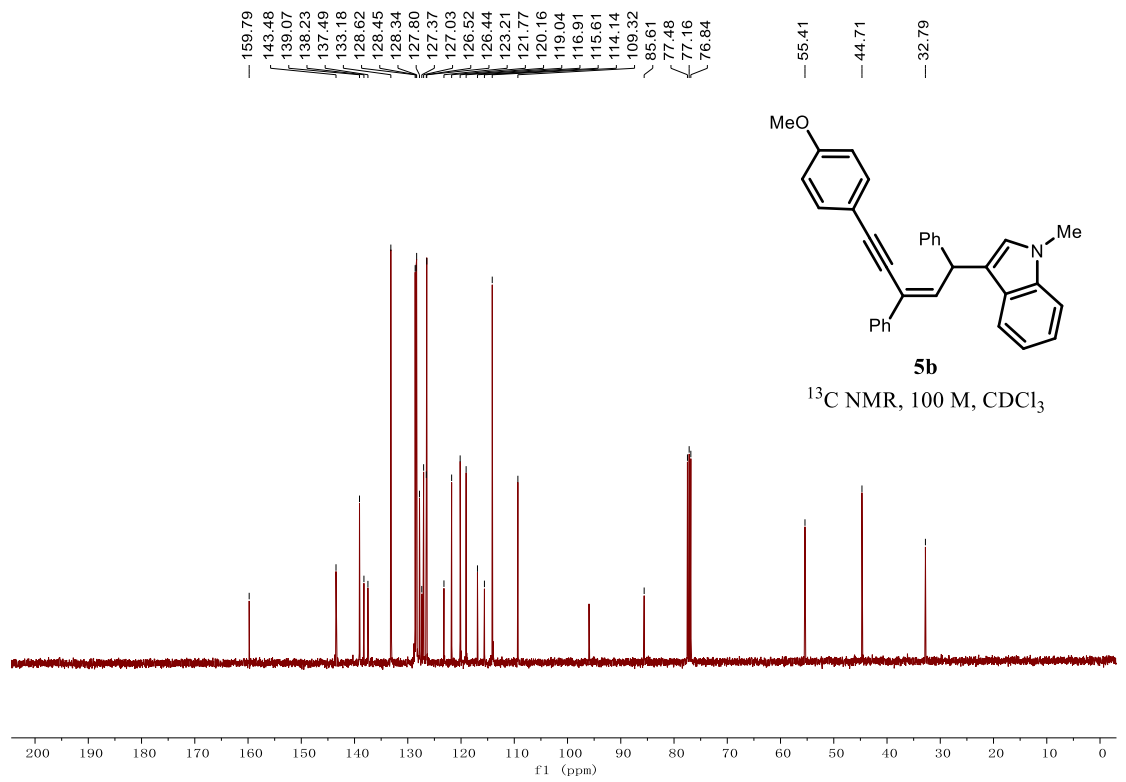

# HRMS spectrum

## Elemental Composition Report

Page 1

### Single Mass Analysis

Tolerance = 5.0 mDa / DBE: min = -1.5, max = 50.0

Element prediction: Off

Number of isotope peaks used for i-FIT = 3

Monoisotopic Mass, Even Electron Ions

1431 formula(e) evaluated with 1 results within limits (up to 50 closest results for each mass)

Elements Used:

C: 33-33 H: 27-27 N: 0-100 O: 0-100 Na: 0-2

7

250403-12-761-2-YQZ-16 14 (0.143)

1: TOF MS ES+  
2.63e+006

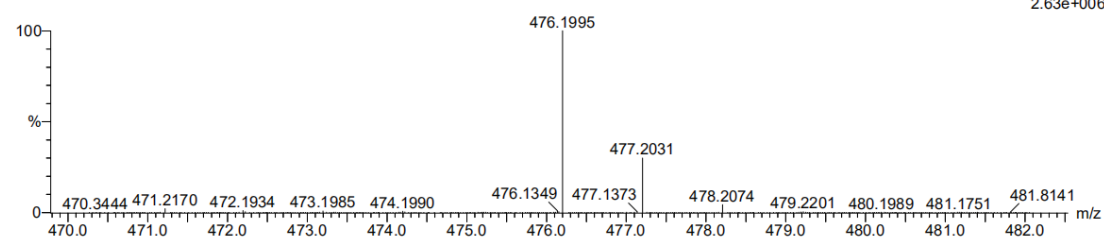

Minimum: -1.5  
Maximum: 5.0 10.0 50.0

| Mass     | Calc. Mass | mDa | PPM | DBE  | i-FIT | Norm | Conf (%) | Formula        |
|----------|------------|-----|-----|------|-------|------|----------|----------------|
| 476.1995 | 476.1990   | 0.5 | 1.0 | 20.5 | 992.0 | n/a  | n/a      | C33 H27 N 0 Na |

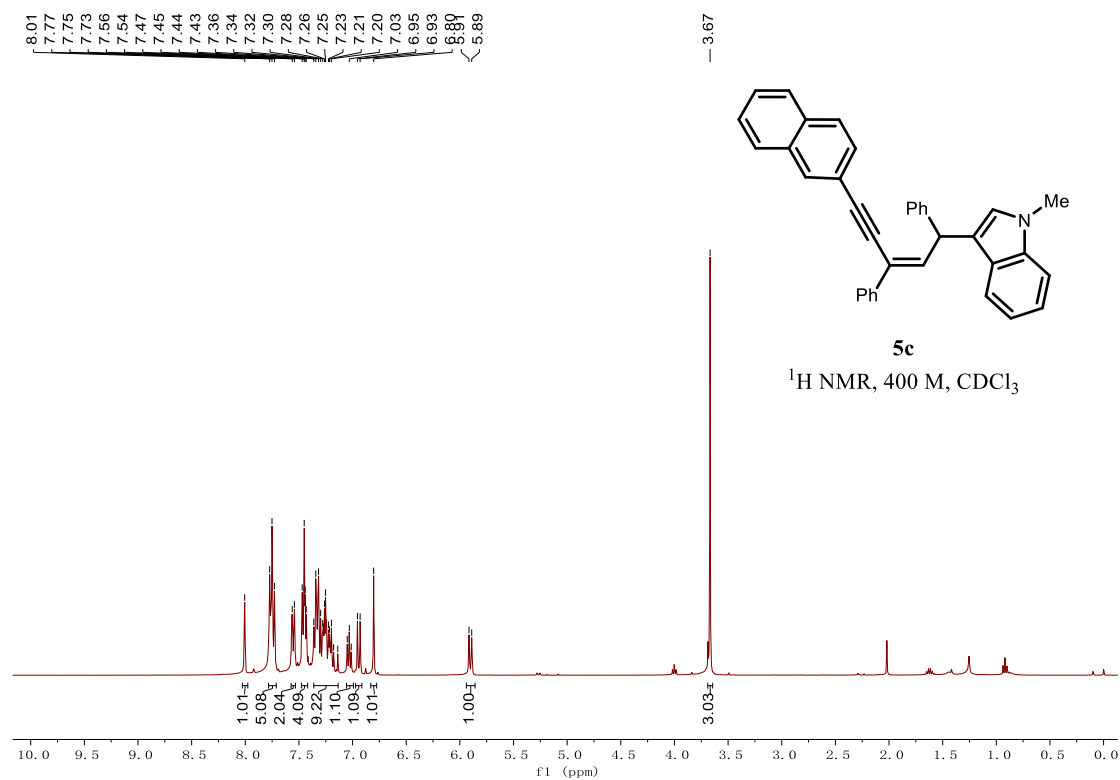

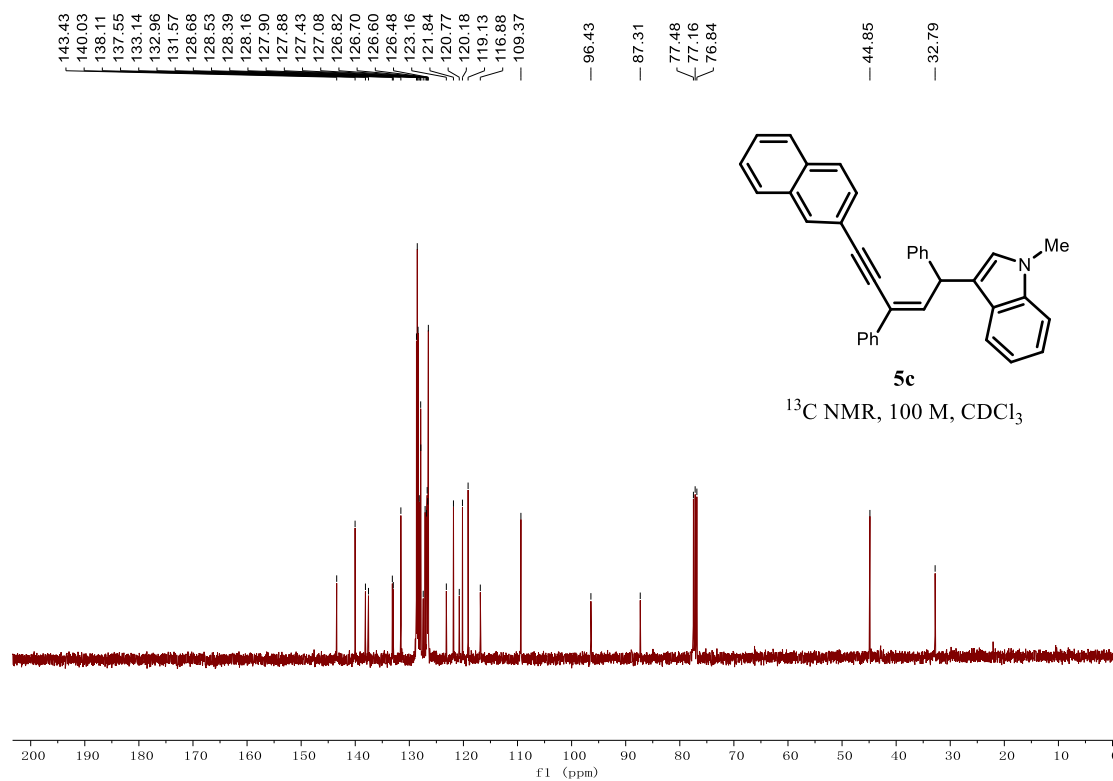

## HRMS spectrum

### Elemental Composition Report

Page 1

#### Single Mass Analysis

Tolerance = 5.0 mDa / DBE: min = -1.5, max = 50.0

Element prediction: Off

Number of isotope peaks used for i-FIT = 3

Monoisotopic Mass, Even Electron Ions

1447 formula(e) evaluated with 1 results within limits (up to 50 best isotopic matches for each mass)

Elements Used:

C: 36-36 H: 28-28 N: 0-100 O: 0-100 Na: 0-2

46

250809-1-12 16 (0.109)

1: TOF MS ES+  
8.79e+003

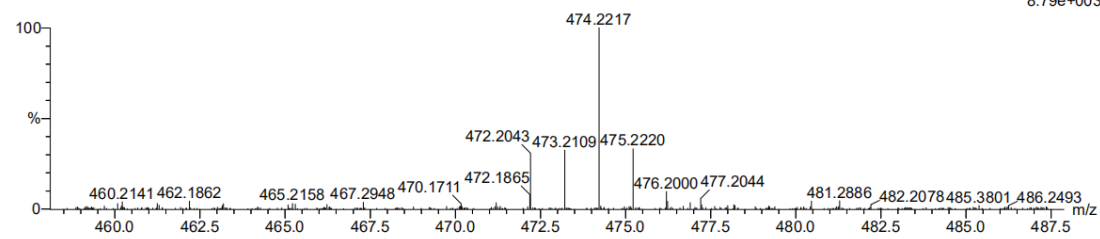

Minimum: -1.5  
 Maximum: 5.0 10.0 50.0

| Mass     | Calc. Mass | mDa  | PPM  | DBE  | i-FIT | Norm | Conf (%) | Formula                           |
|----------|------------|------|------|------|-------|------|----------|-----------------------------------|
| 474.2217 | 474.2222   | -0.5 | -1.1 | 23.5 | 233.8 | n/a  | n/a      | C <sub>36</sub> H <sub>28</sub> N |

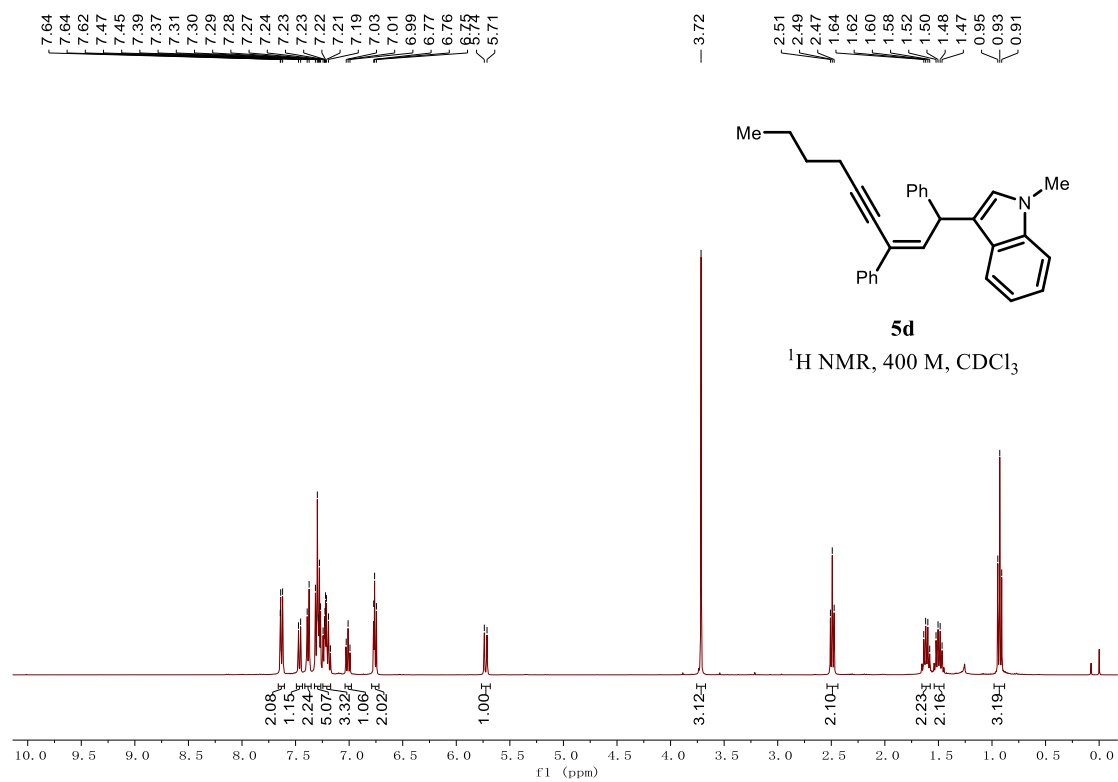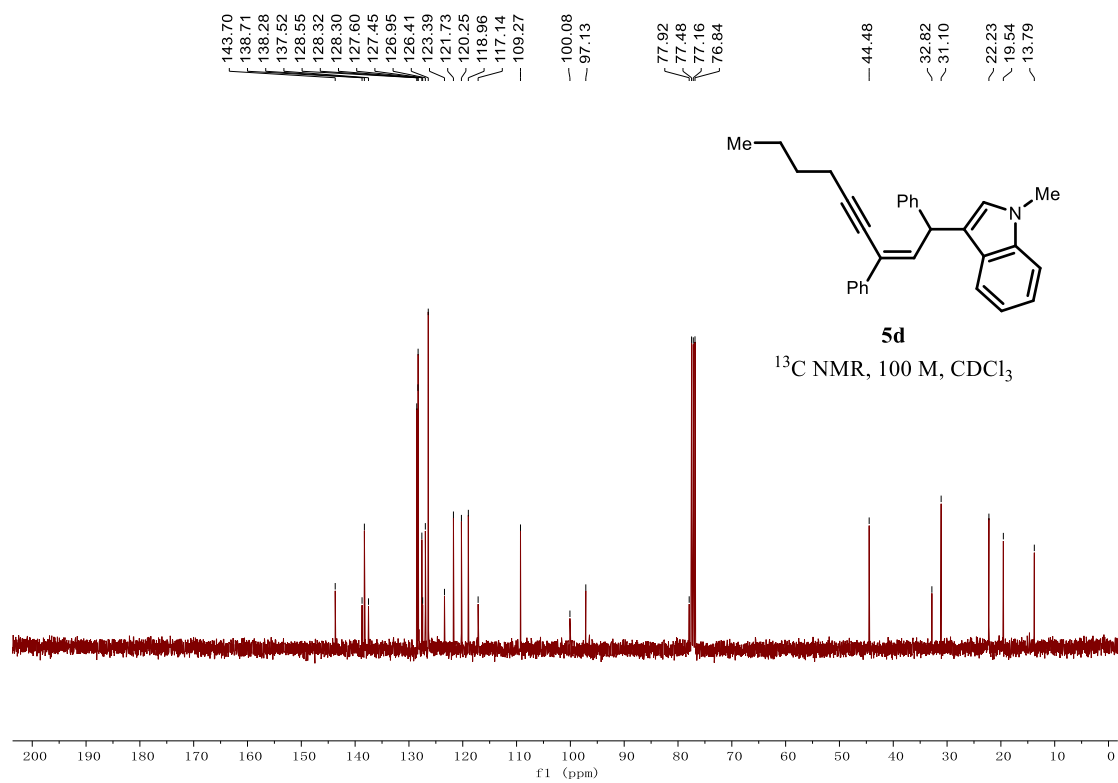

# HRMS spectrum

## Elemental Composition Report

Page 1

### Single Mass Analysis

Tolerance = 5.0 mDa / DBE: min = -1.5, max = 50.0

Element prediction: Off

Number of isotope peaks used for i-FIT = 3

Monoisotopic Mass, Even Electron Ions

1147 formula(e) evaluated with 1 results within limits (up to 50 closest results for each mass)

Elements Used:

C: 30-30 H: 29-29 N: 0-100 O: 0-100 Na: 0-2

7

250403-12-761-2-YQZ-30 23 (0.227)

1: TOF MS ES+  
8.72e+004

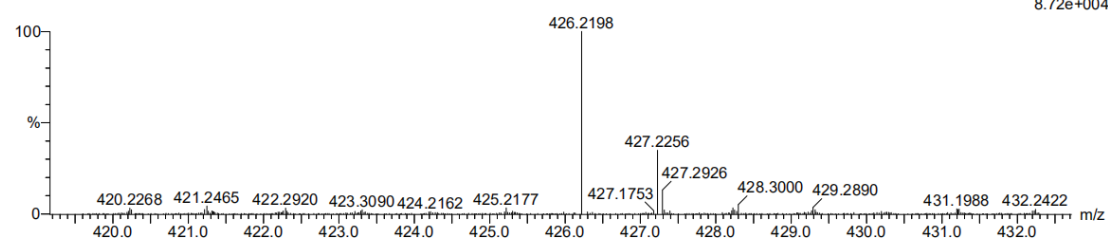

Minimum: -1.5  
Maximum: 5.0 10.0 50.0

| Mass     | Calc. Mass | mDa | PPM | DBE  | i-FIT | Norm | Conf (%) | Formula      |
|----------|------------|-----|-----|------|-------|------|----------|--------------|
| 426.2198 | 426.2198   | 0.0 | 0.0 | 16.5 | 738.8 | n/a  | n/a      | C30 H29 N Na |

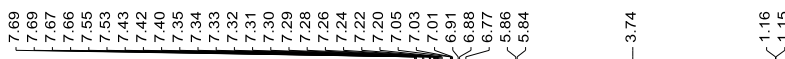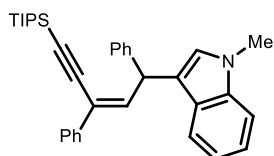

**5e**

<sup>1</sup>H NMR, 400 M, CDCl<sub>3</sub>

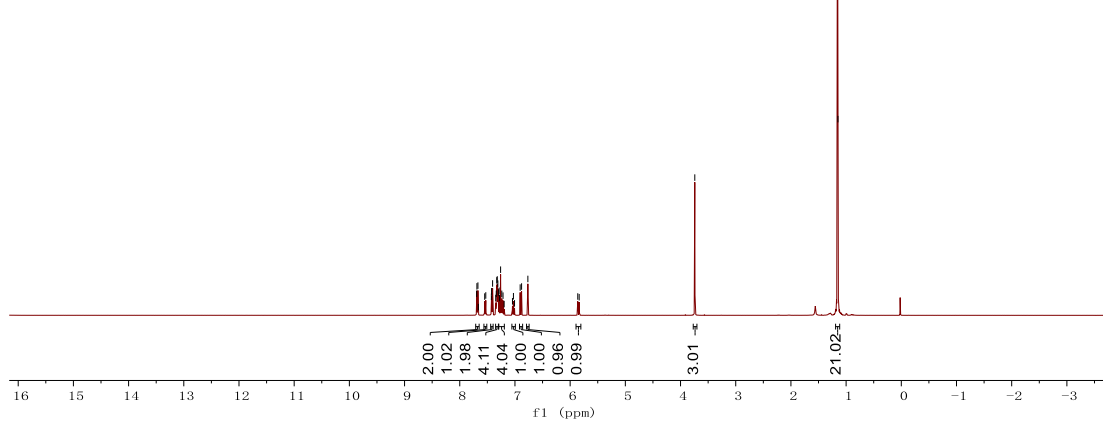

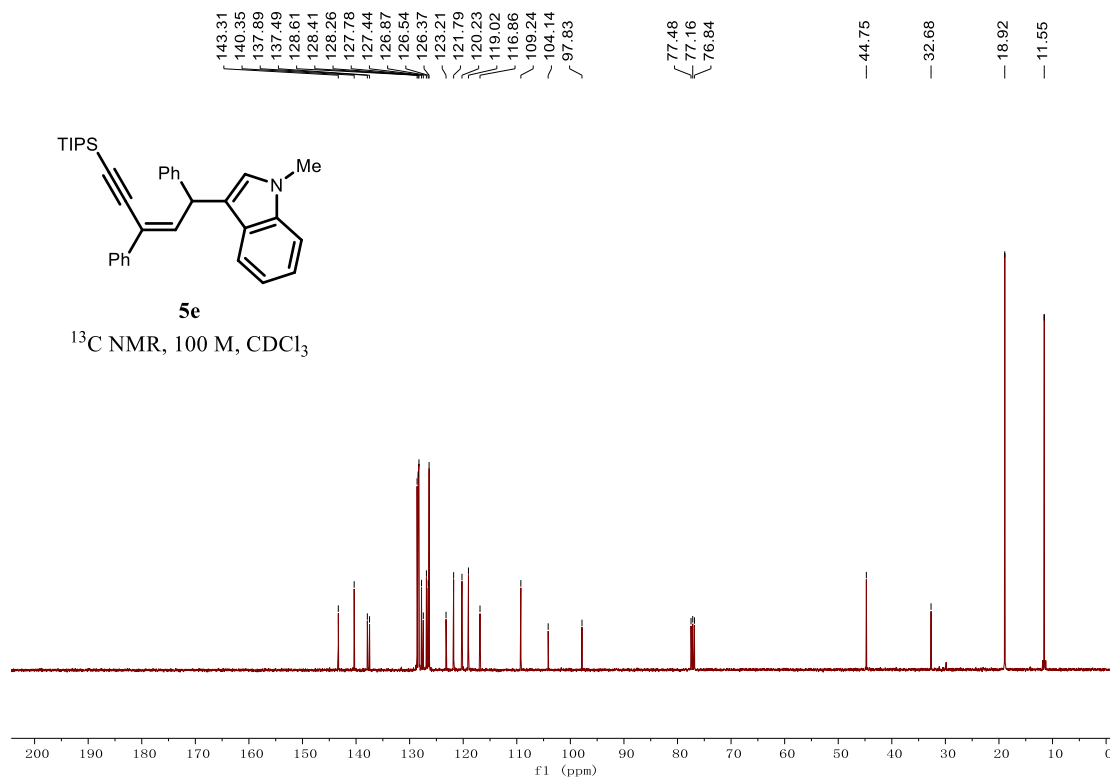

## HRMS spectrum

### Elemental Composition Report

Page 1

#### Single Mass Analysis

Tolerance = 5.0 mDa / DBE: min = -1.5, max = 50.0

Element prediction: Off

Number of isotope peaks used for i-FIT = 3

Monoisotopic Mass, Even Electron Ions

1425 formula(e) evaluated with 1 results within limits (up to 50 best isotopic matches for each mass)

Elements Used:

C: 35-35 H: 42-42 N: 0-100 O: 0-100 Si: 1-3

46

250809-1-13 26 (0.161)

1: TOF MS ES+  
1.11e+004

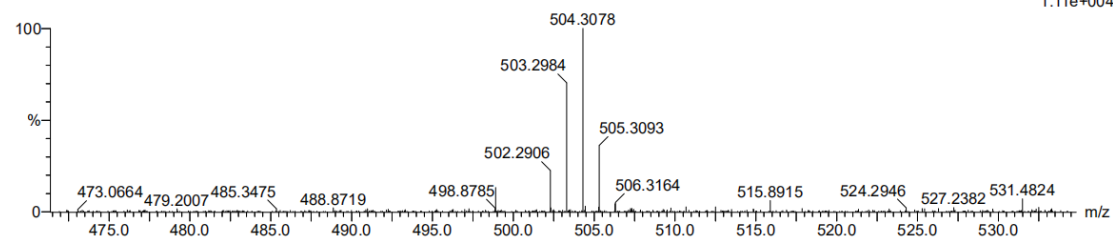

Minimum: -1.5  
Maximum: 50.0

| Mass     | Calc. Mass | mDa  | PPM  | DBE  | i-FIT | Norm | Conf (%) | Formula                              |
|----------|------------|------|------|------|-------|------|----------|--------------------------------------|
| 504.3078 | 504.3087   | -0.9 | -1.8 | 16.5 | 208.3 | n/a  | n/a      | C <sub>35</sub> H <sub>42</sub> N Si |

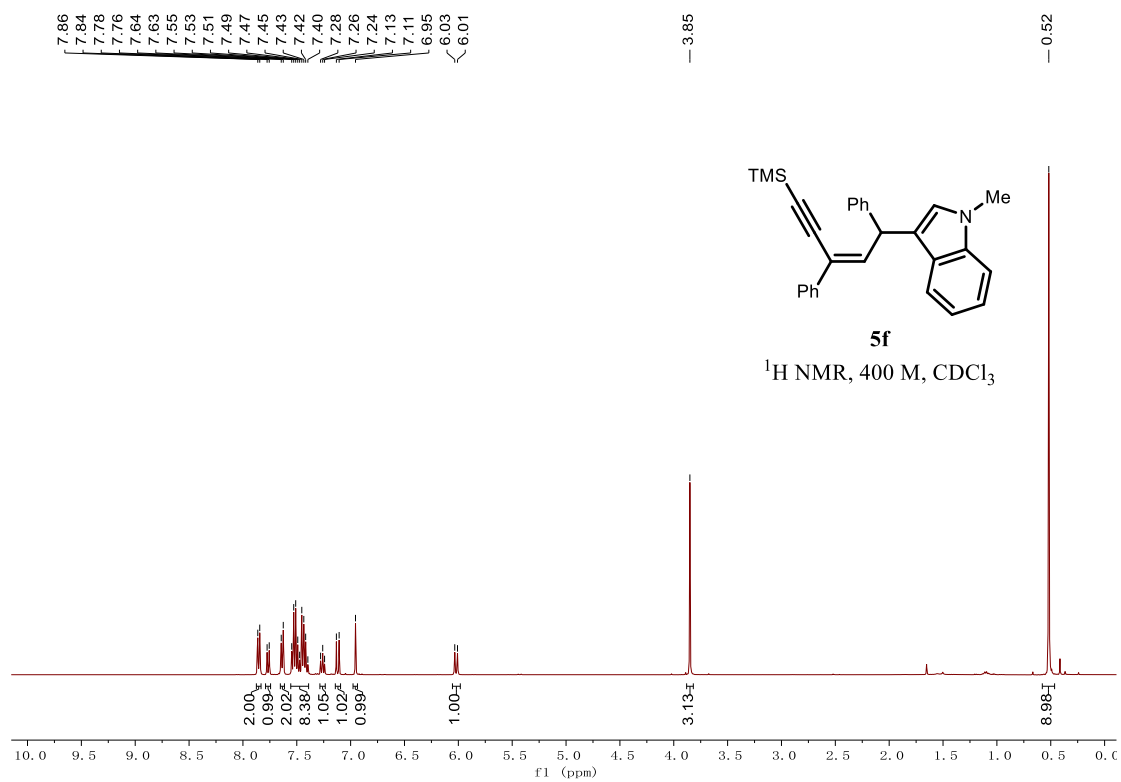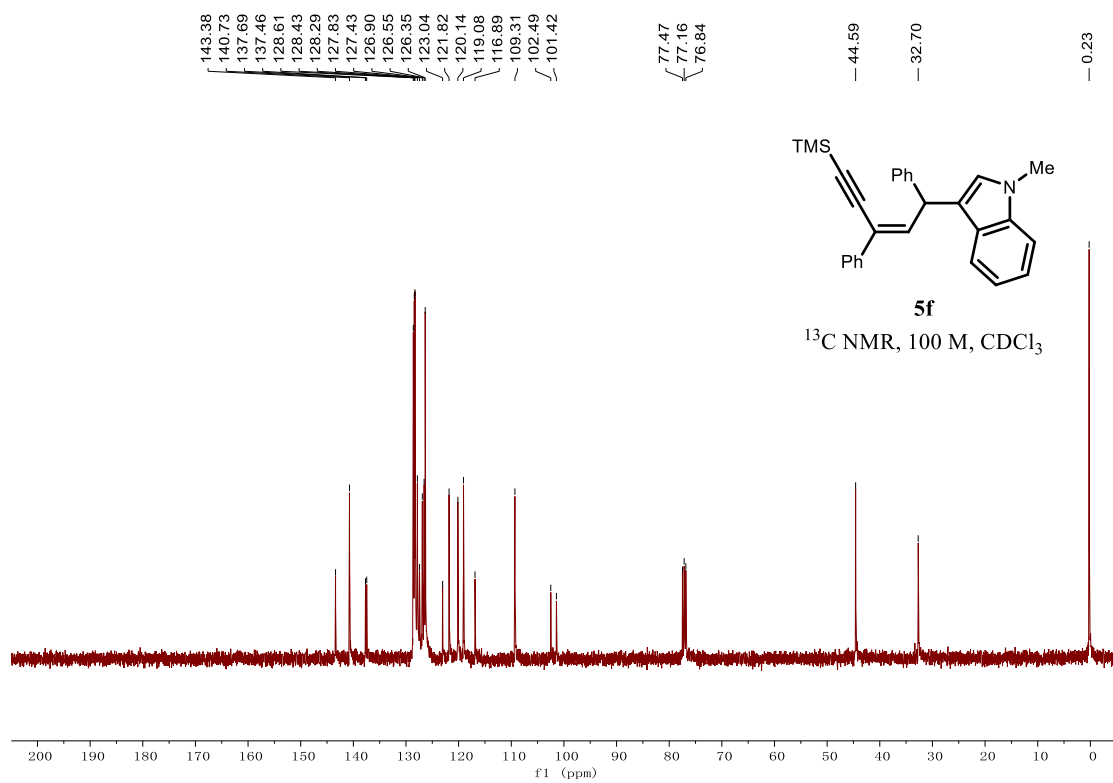

# HRMS spectrum

## Elemental Composition Report

Page 1

### Single Mass Analysis

Tolerance = 10.0 PPM / DBE: min = -1.5, max = 50.0

Element prediction: Off

Number of isotope peaks used for i-FIT = 3

Monoisotopic Mass, Even Electron Ions

20 formula(e) evaluated with 1 results within limits (all results (up to 1000) for each mass)

Elements Used:

C: 29-29 H: 1-60 N: 1-10 Si: 1-2

48

250511-2-71 19 (0.196)

1: TOF MS ES+  
9.11e+004

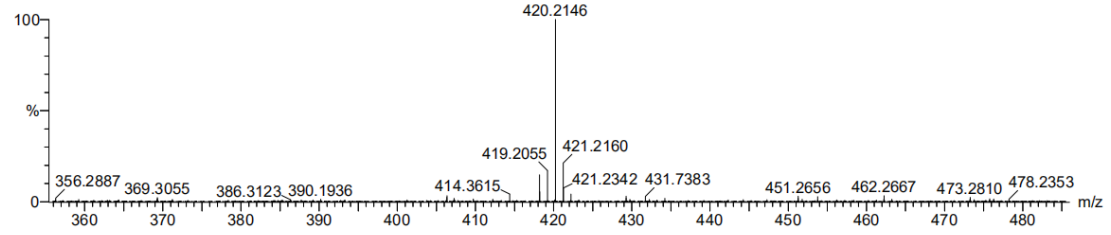

Minimum: -1.5  
Maximum: 5.0 10.0 50.0

| Mass     | Calc. Mass | mDa  | PPM  | DBE  | i-FIT | Norm | Conf (%) | Formula      |
|----------|------------|------|------|------|-------|------|----------|--------------|
| 420.2146 | 420.2148   | -0.2 | -0.5 | 16.5 | 554.2 | n/a  | n/a      | C29 H30 N Si |

7.65, 7.63, 7.54, 7.52, 7.35, 7.34, 7.32, 7.30, 7.28, 7.25, 7.24, 7.22, 6.86, 6.84, 6.56, 6.53, 5.80, 5.78, 4.62, 4.59, 4.57, 4.54, 3.74, 1.14

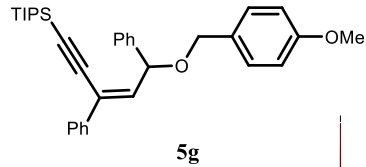

<sup>1</sup>H NMR, 400 M, CDCl<sub>3</sub>

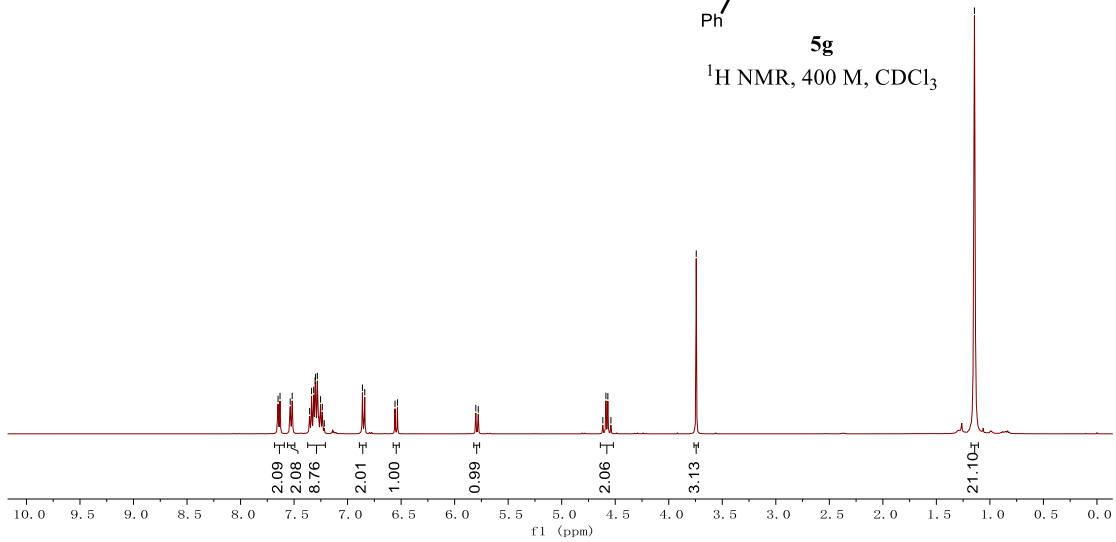

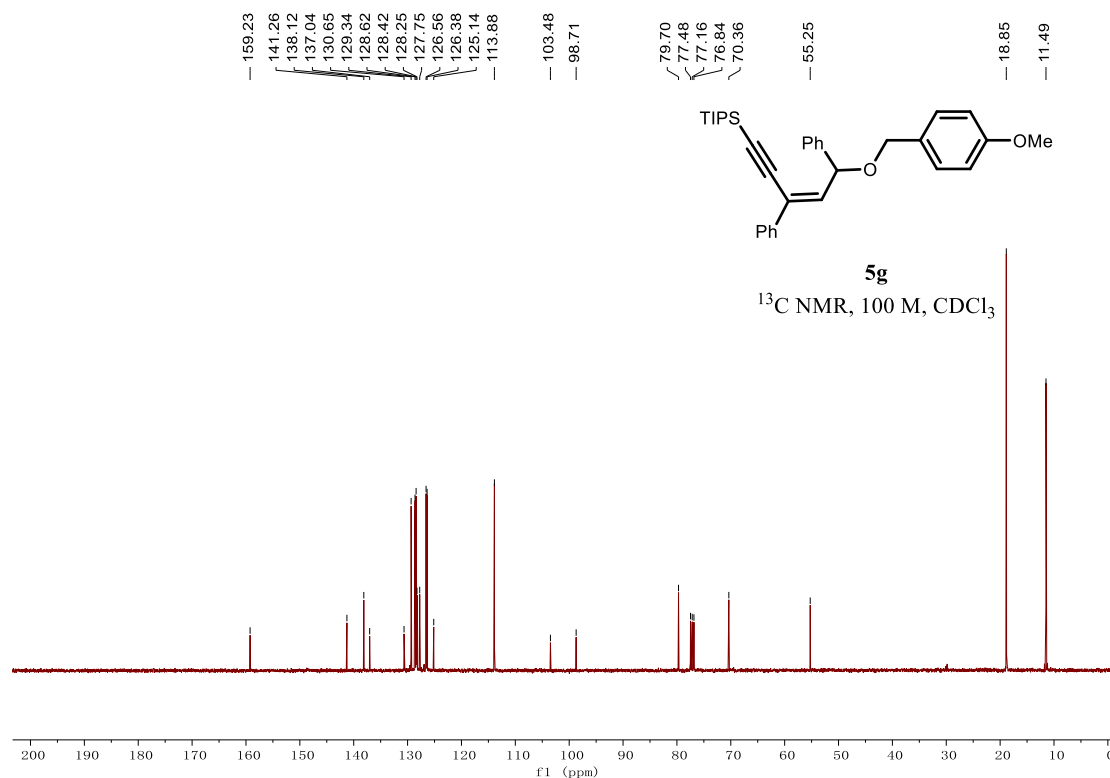

## HRMS spectrum

### Elemental Composition Report

Page 1

#### Single Mass Analysis

Tolerance = 5.0 mDa / DBE: min = -1.5, max = 50.0

Element prediction: Off

Number of isotope peaks used for i-FIT = 3

Monoisotopic Mass, Even Electron Ions

4335 formula(e) evaluated with 1 results within limits (up to 50 best isotopic matches for each mass)

Elements Used:

C: 34-34 H: 42-42 N: 0-100 O: 0-100 Na: 0-2 Si: 1-3

46

250809-1-16 28 (0.172)

1: TOF MS ES+  
1.10e+006

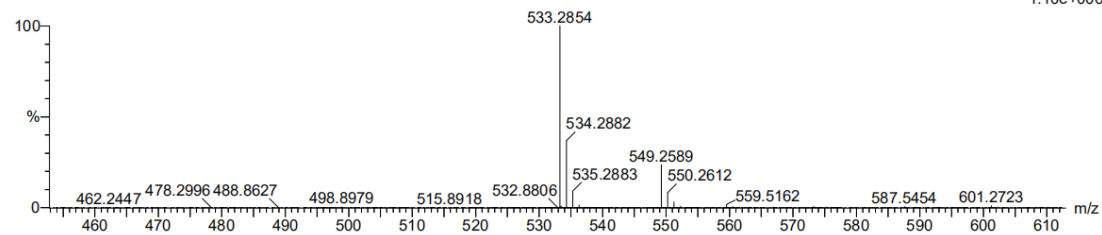

Minimum: -1.5  
 Maximum: 5.0 10.0 50.0

| Mass     | Calc. Mass | mDa | PPM | DBE  | i-FIT | Norm | Conf (%) | Formula          |
|----------|------------|-----|-----|------|-------|------|----------|------------------|
| 533.2854 | 533.2852   | 0.2 | 0.4 | 14.5 | 749.3 | n/a  | n/a      | C34 H42 O2 Na Si |

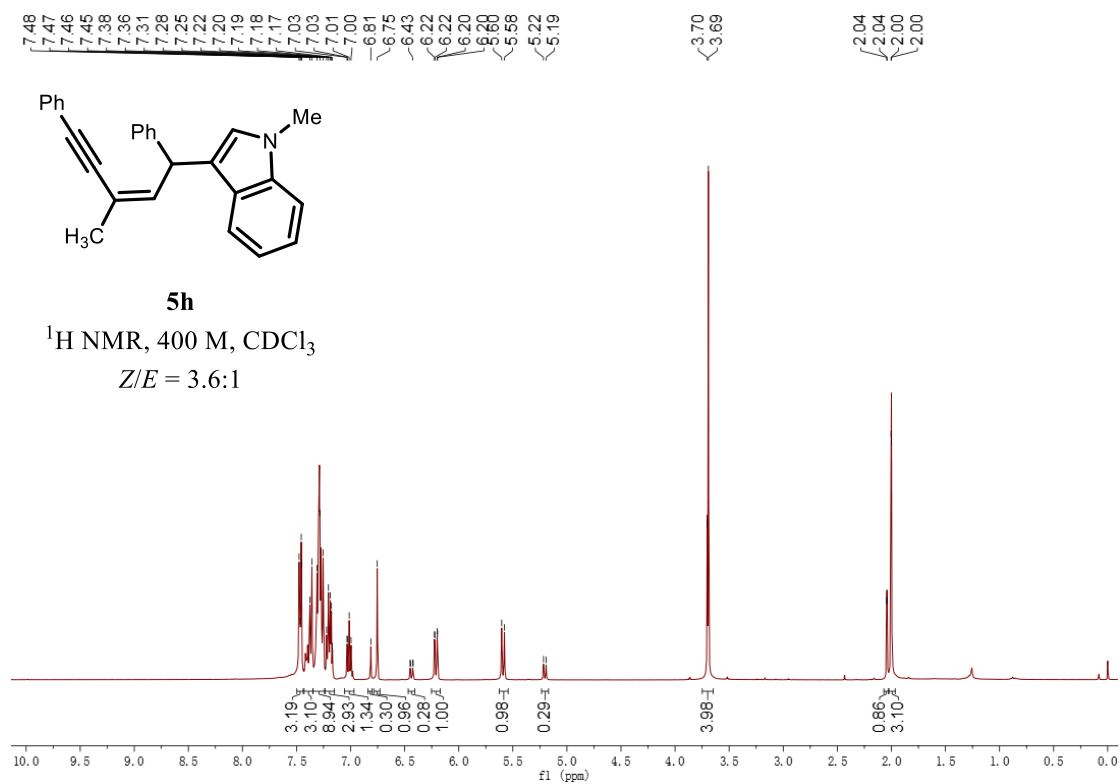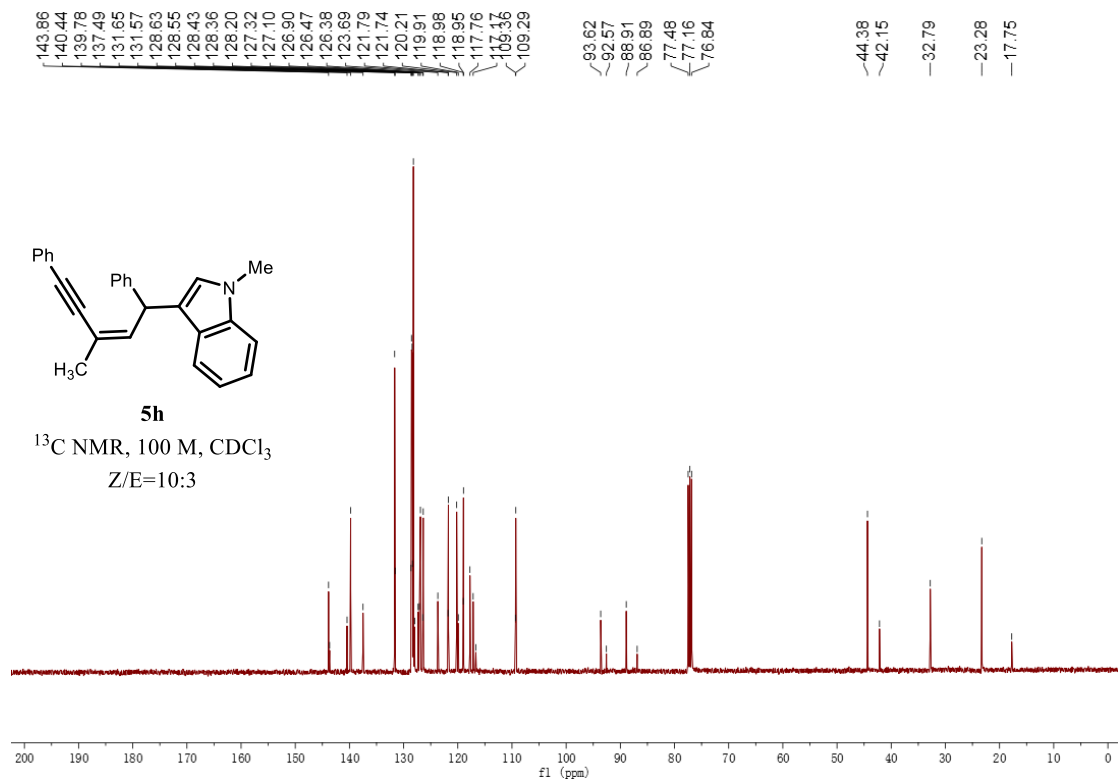

HRMS spectrum

Elemental Composition Report

Single Mass Analysis

Tolerance = 5.0 mDa / DBE: min = -1.5, max = 50.0

Element prediction: Off

Number of isotope peaks used for i-FIT = 3

Monoisotopic Mass, Even Electron Ions

929 formula(e) evaluated with 1 results within limits (up to 50 closest results for each mass)

Elements Used:

C: 27-27 H: 23-23 N: 0-100 O: 0-100 Na: 0-2

7

250403-12-761-2-YQZ-22 23 (0.227)

1: TOF MS ES+  
5.37e+004

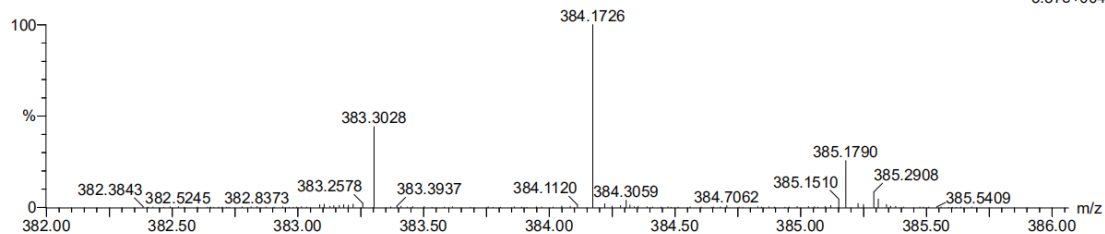

Minimum: -1.5  
Maximum: 5.0 10.0 50.0

| Mass     | Calc. Mass | mDa  | PPM  | DBE  | i-FIT | Norm | Conf (%) | Formula      |
|----------|------------|------|------|------|-------|------|----------|--------------|
| 384.1726 | 384.1728   | -0.2 | -0.5 | 16.5 | 560.3 | n/a  | n/a      | C27 H23 N Na |

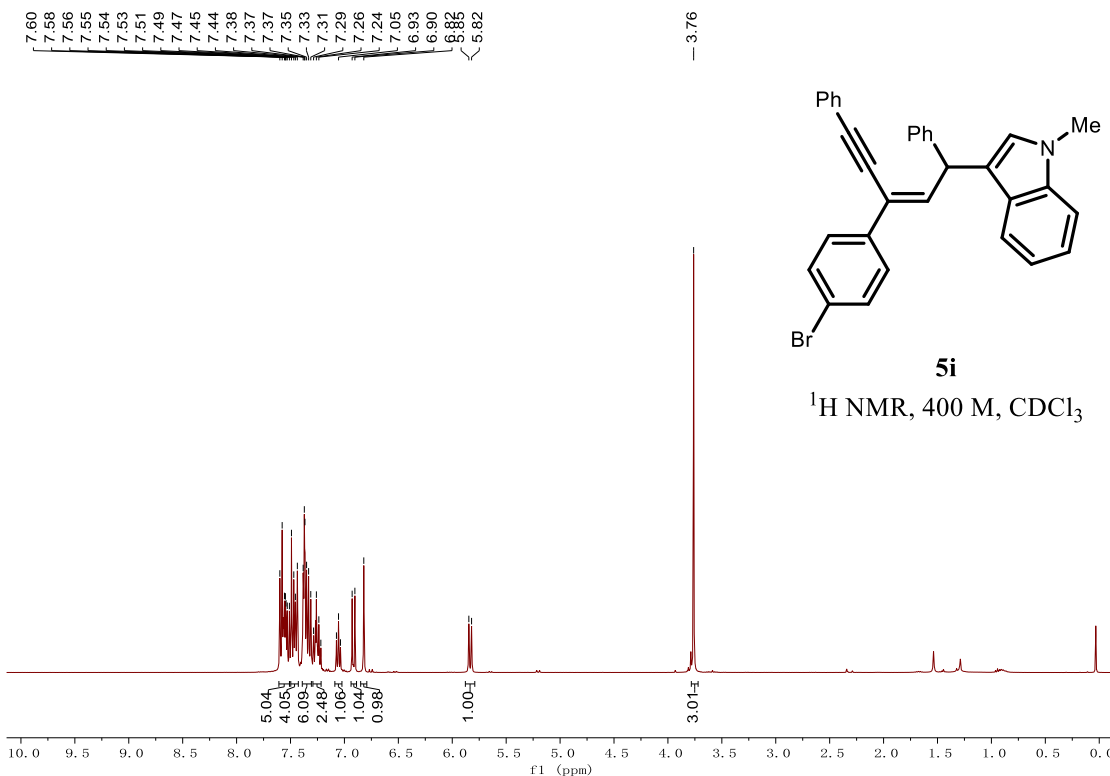

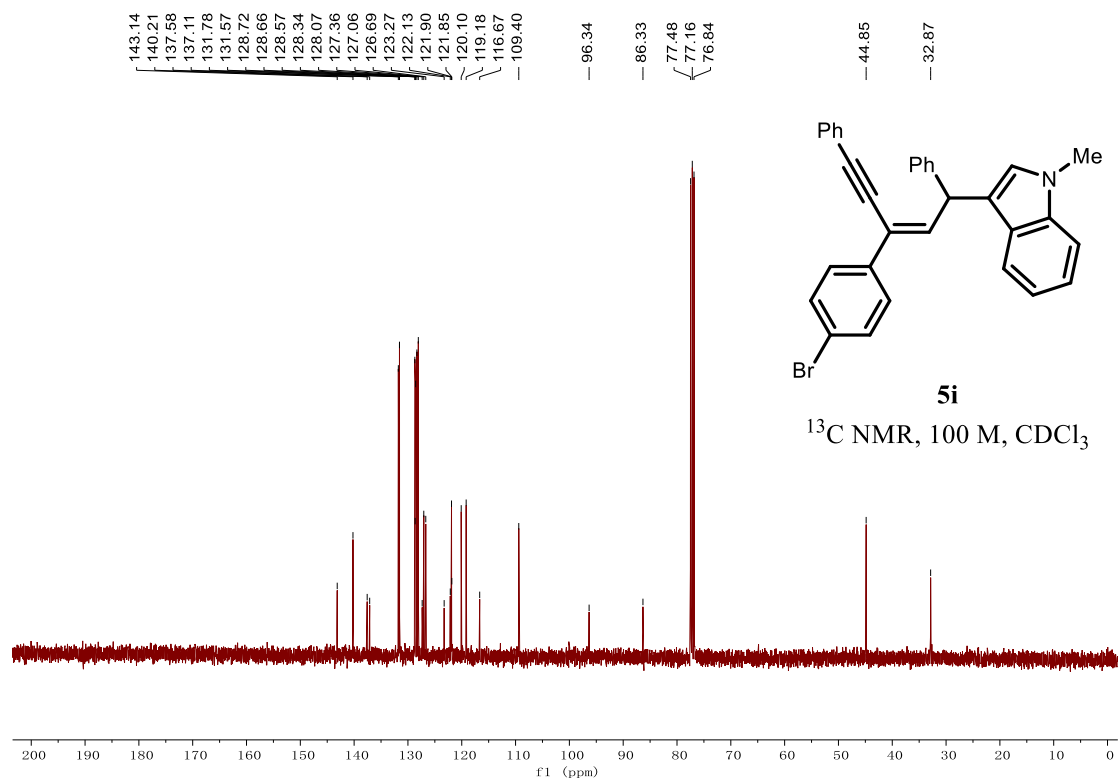

## HRMS spectrum

### Elemental Composition Report

Page 1

#### Single Mass Analysis

Tolerance = 10.0 PPM / DBE: min = -1.5, max = 50.0

Element prediction: Off

Number of isotope peaks used for i-FIT = 3

Monoisotopic Mass, Even Electron Ions

28 formula(e) evaluated with 1 results within limits (all results (up to 1000) for each mass)

Elements Used:

C: 29-32 H: 1-60 N: 1-10 Br: 1-2

48

250511-2-72 10 (0.111)

1: TOF MS ES+  
2.10e+005

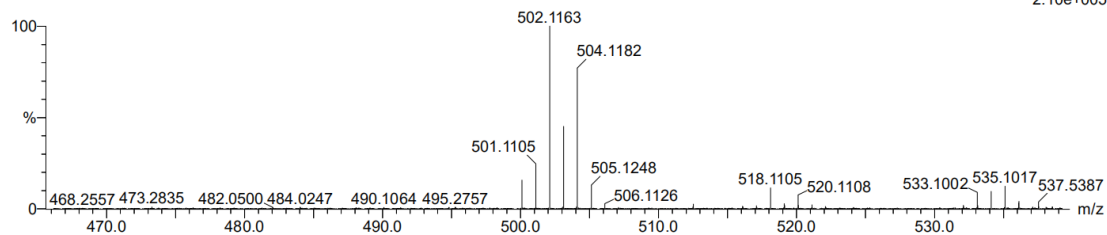

Minimum: -1.5  
Maximum: 5.0 10.0 50.0

| Mass     | Calc. Mass | mDa  | PPM  | DBE  | i-FIT | Norm | Conf (%) | Formula      |
|----------|------------|------|------|------|-------|------|----------|--------------|
| 502.1163 | 502.1170   | -0.7 | -1.4 | 20.5 | 764.7 | n/a  | n/a      | C32 H25 N Br |

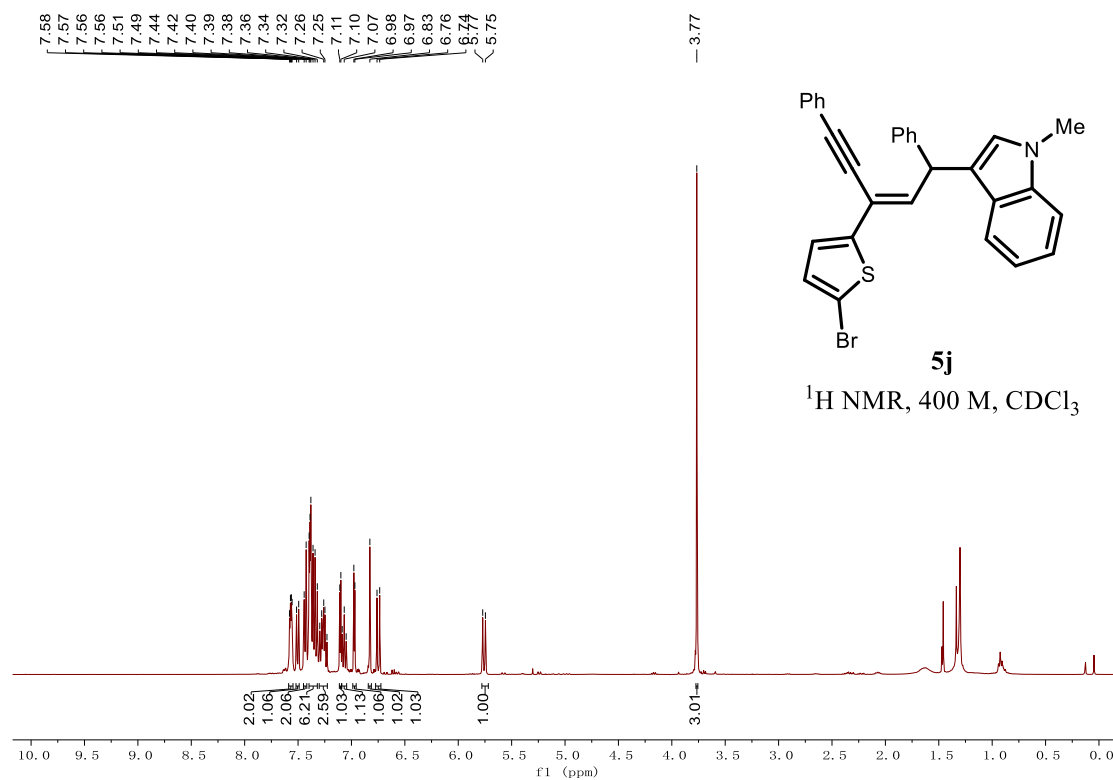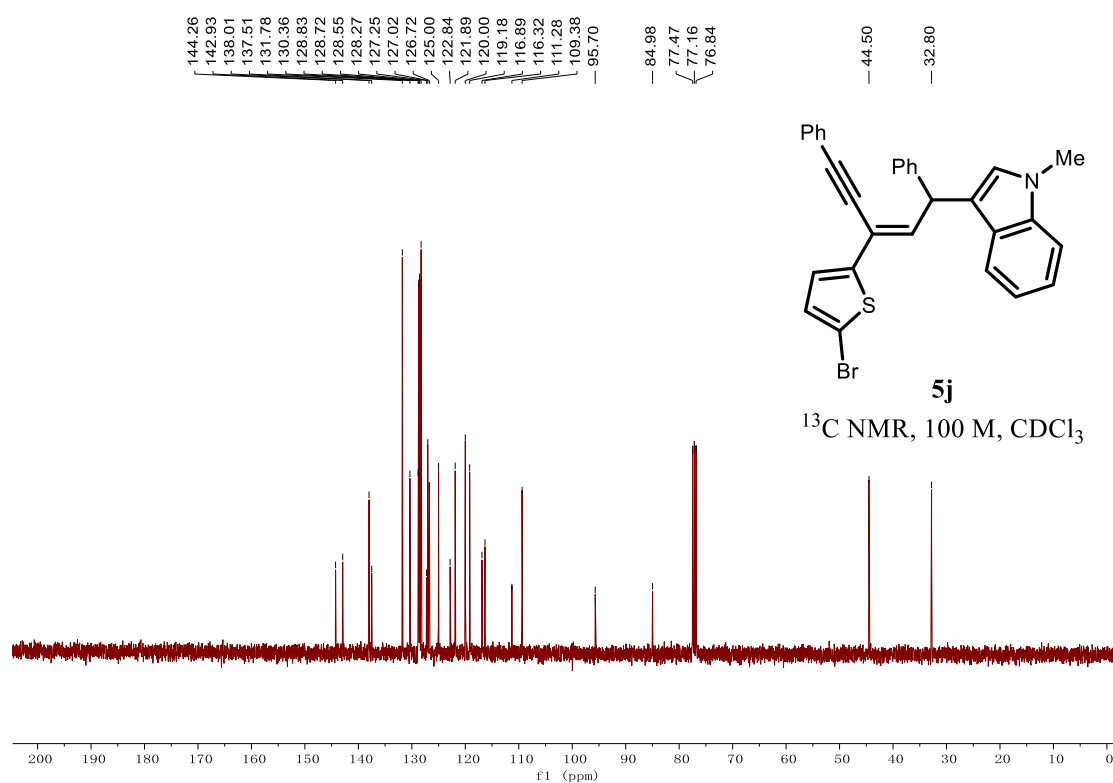

HRMS spectrum

## Single Mass Analysis

Tolerance = 5.0 mDa / DBE: min = -1.5, max = 50.0

Element prediction: Off

Number of isotope peaks used for i-FIT = 3

Monoisotopic Mass, Even Electron Ions

1905 formula(e) evaluated with 1 results within limits (up to 50 best isotopic matches for each mass)

Elements Used:

C: 30-30 H: 21-21 N: 0-100 O: 0-100 S: 1-4 Br: 1-2

46

250809-1-14 7 (0.062)

1: TOF MS ES+  
1.99e+003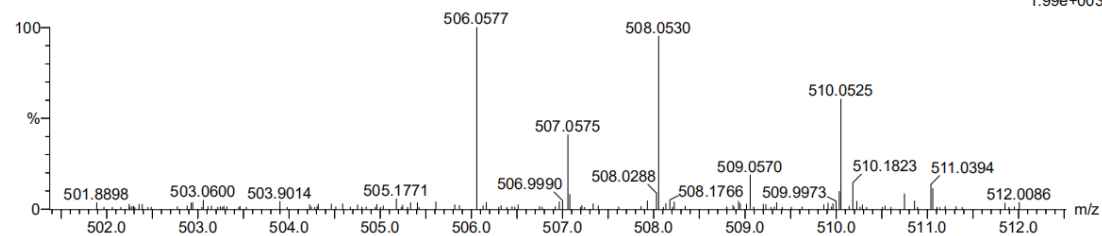

Minimum: -1.5  
Maximum: 5.0 10.0 50.0

| Mass     | Calc. Mass | mDa  | PPM  | DBE  | i-FIT | Norm | Conf (%) | Formula        | N | S | Br |
|----------|------------|------|------|------|-------|------|----------|----------------|---|---|----|
| 506.0577 | 506.0578   | -0.1 | -0.2 | 20.5 | 230.5 | n/a  | n/a      | C30 H21 N S Br |   |   |    |

7.47  
7.45  
7.38  
7.36  
7.34  
7.33  
7.31  
7.29  
7.27  
7.26  
7.25  
7.24  
7.22  
7.21  
7.19  
7.07  
6.17  
6.15  
5.89  
5.87  
5.55  
5.52  
5.16  
5.14  
4.63  
4.60  
4.58  
4.55  
1.96  
1.93  
1.92

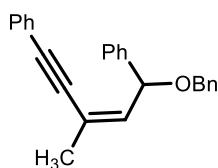**5k**<sup>1</sup>H NMR, 400 M, CDCl<sub>3</sub>*Z/E* = 9:1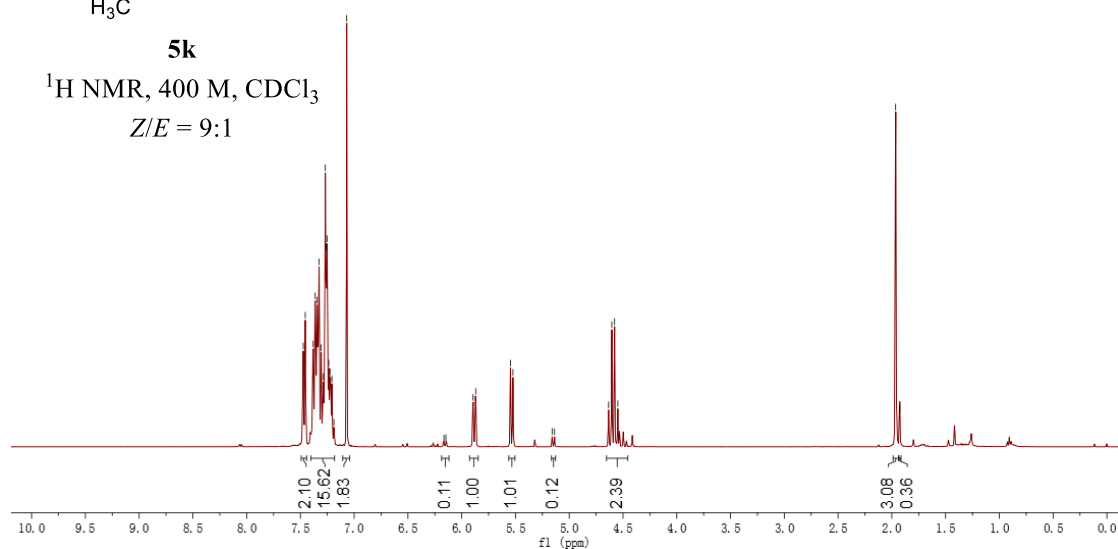

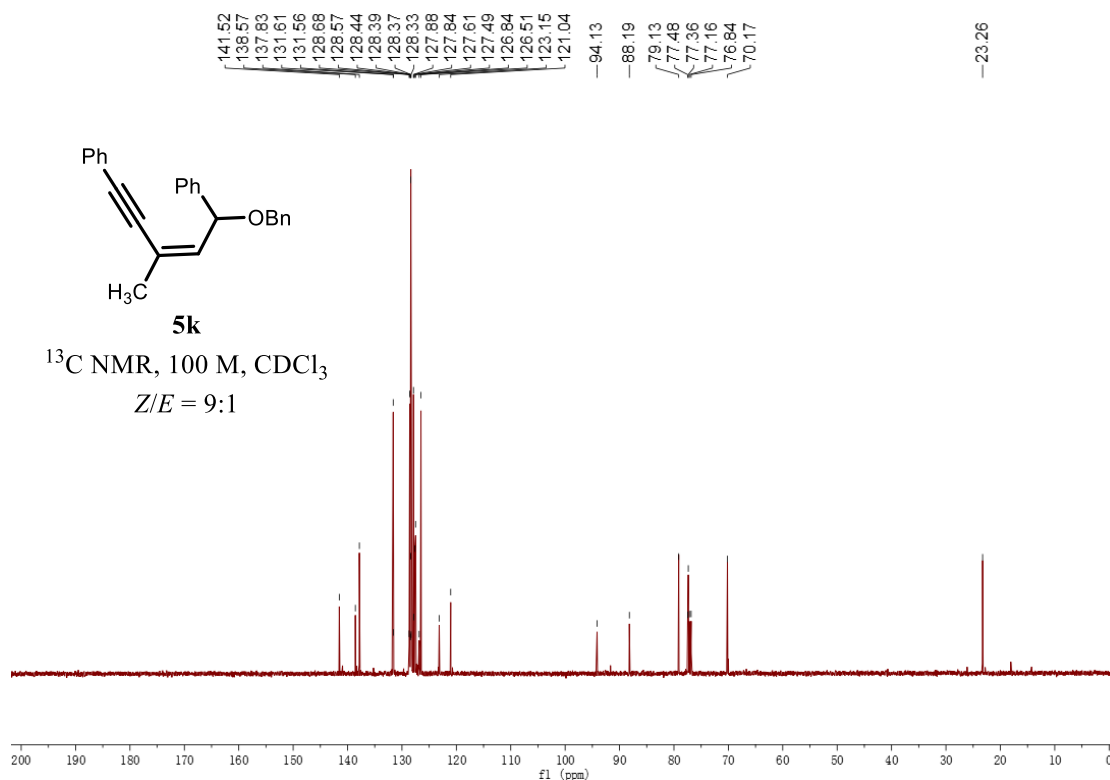

## HRMS spectrum

### Elemental Composition Report

Page 1

#### Single Mass Analysis

Tolerance = 5.0 mDa / DBE: min = -1.5, max = 50.0

Element prediction: Off

Number of isotope peaks used for i-FIT = 3

Monoisotopic Mass, Even Electron Ions

813 formula(e) evaluated with 1 results within limits (up to 50 best isotopic matches for each mass)

Elements Used:

C: 25-25 H: 22-22 N: 0-100 O: 0-100 Na: 0-2

46

250809-1-20 13 (0.093)

1: TOF MS ES+  
4.45e+005

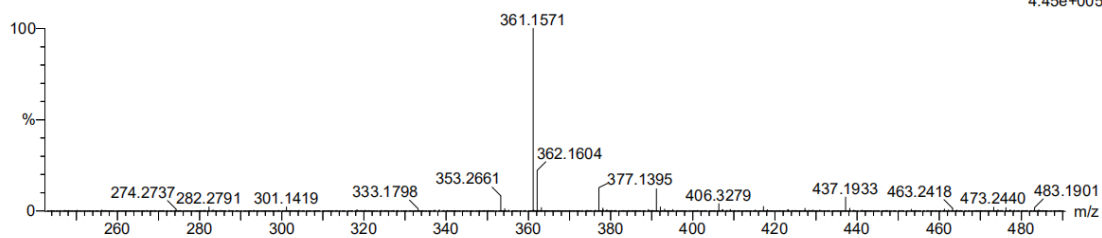

Minimum: -1.5  
Maximum: 5.0 10.0 50.0

| Mass     | Calc. Mass | mDa | PPM | DBE  | i-FIT | Norm | Conf (%) | Formula                              |
|----------|------------|-----|-----|------|-------|------|----------|--------------------------------------|
| 361.1571 | 361.1568   | 0.3 | 0.8 | 14.5 | 600.0 | n/a  | n/a      | C <sub>25</sub> H <sub>22</sub> O Na |

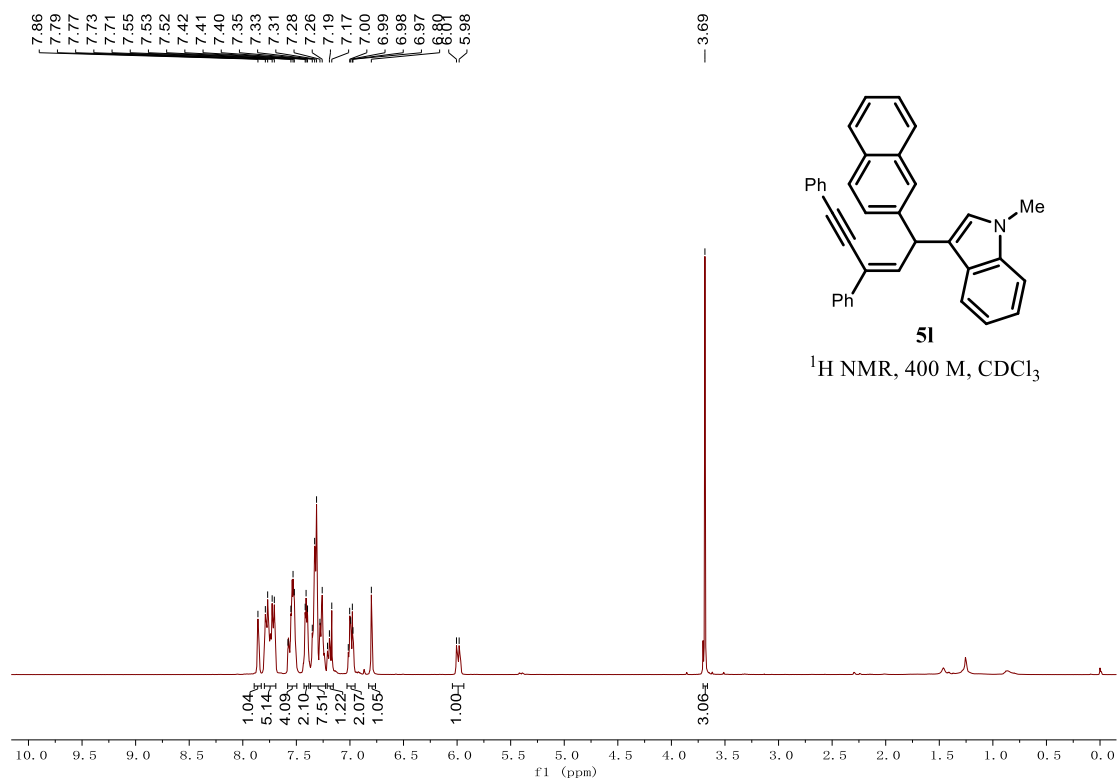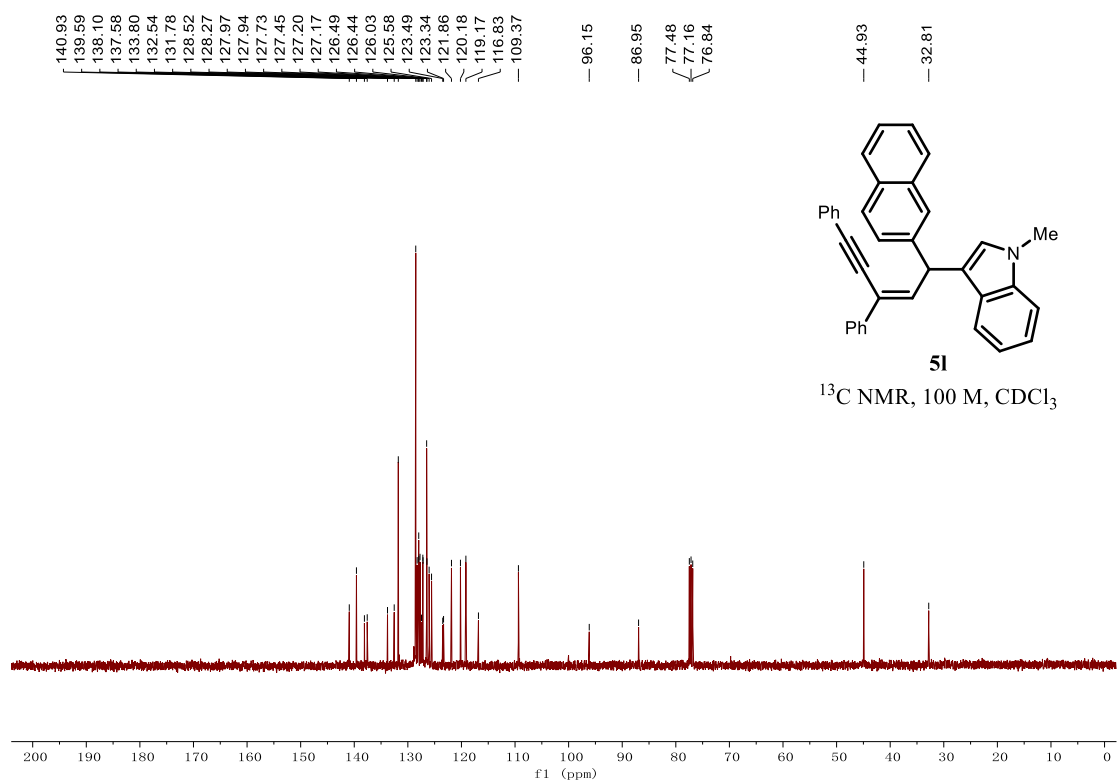

# HRMS spectrum

## Elemental Composition Report

Page 1

### Single Mass Analysis

Tolerance = 10.0 PPM / DBE: min = -1.5, max = 50.0

Element prediction: Off

Number of isotope peaks used for i-FIT = 3

Monoisotopic Mass, Even Electron Ions

42 formula(e) evaluated with 1 results within limits (all results (up to 1000) for each mass)

Elements Used:

C: 26-36 H: 1-60 N: 1-10

48

250511-2-70 13 (0.137)

1: TOF MS ES+  
2.04e+005

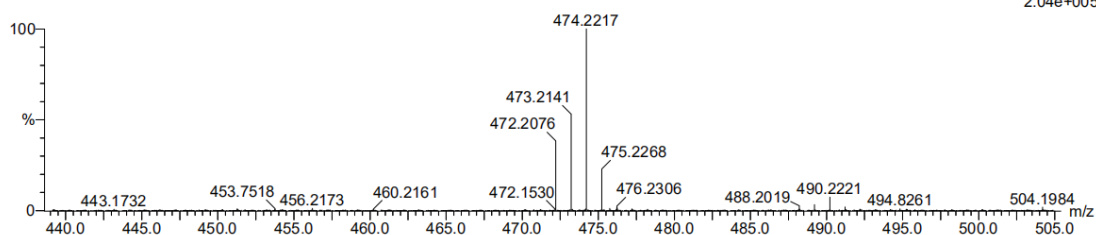

Minimum: -1.5  
Maximum: 5.0 10.0 50.0

| Mass     | Calc. Mass | mDa  | PPM  | DBE  | i-FIT | Norm | Conf (%) | Formula   |
|----------|------------|------|------|------|-------|------|----------|-----------|
| 474.2217 | 474.2222   | -0.5 | -1.1 | 23.5 | 714.2 | n/a  | n/a      | C36 H28 N |

7.91  
7.90  
7.89  
7.88  
7.87  
7.86  
7.85  
7.84  
7.83  
7.82  
7.81  
7.80  
7.79  
7.78  
7.77  
7.76  
7.75  
7.74  
7.73  
7.72  
7.71  
7.70  
7.69  
7.68  
7.67  
7.66  
7.65  
7.64  
7.63  
7.62  
7.61  
7.60  
7.59  
7.58  
7.57  
7.56  
7.55  
7.54  
7.53  
7.52  
7.51  
7.50  
7.49  
7.48  
7.47  
7.46  
7.45  
7.44  
7.43  
7.42  
7.41  
7.40  
7.39  
7.38  
7.37  
7.36  
7.35  
7.34  
7.33  
7.32  
7.31  
7.30  
7.29  
7.28  
7.27  
7.26  
7.25  
7.24  
7.23  
7.22  
7.21  
7.20  
7.19  
7.18  
7.17  
7.16  
7.15  
7.14  
7.13  
7.12  
7.11  
7.10  
7.09  
7.08  
7.07  
7.06  
7.05  
7.04  
7.03  
7.02  
7.01  
7.00  
6.99  
6.98  
6.97  
6.96  
6.95  
6.94  
6.93  
6.92  
6.91  
6.90  
6.89  
6.88  
6.87  
6.86  
6.85  
6.84  
6.83  
6.82  
6.81  
6.80  
6.79  
6.78  
6.77  
6.76  
6.75  
6.74  
6.73  
6.72  
6.71  
6.70  
6.69  
6.68  
6.67  
6.66  
6.65  
6.64  
6.63  
6.62  
6.61  
6.60  
6.59  
6.58  
6.57  
6.56  
6.55  
6.54  
6.53  
6.52  
6.51  
6.50  
6.49  
6.48  
6.47  
6.46  
6.45  
6.44  
6.43  
6.42  
6.41  
6.40  
6.39  
6.38  
6.37  
6.36  
6.35  
6.34  
6.33  
6.32  
6.31  
6.30  
6.29  
6.28  
6.27  
6.26  
6.25  
6.24  
6.23  
6.22  
6.21  
6.20  
6.19  
6.18  
6.17  
6.16  
6.15  
6.14  
6.13  
6.12  
6.11  
6.10  
6.09  
6.08  
6.07  
6.06  
6.05  
6.04  
6.03  
6.02  
6.01  
6.00  
5.99  
5.98  
5.97  
5.96  
5.95  
5.94  
5.93  
5.92  
5.91  
5.90  
5.89  
5.88  
5.87  
5.86  
5.85  
5.84  
5.83  
5.82  
5.81  
5.80  
5.79  
5.78  
5.77  
5.76  
5.75  
5.74  
5.73  
5.72  
5.71  
5.70  
5.69  
5.68  
5.67  
5.66  
5.65  
5.64  
5.63  
5.62  
5.61  
5.60  
5.59  
5.58  
5.57  
5.56  
5.55  
5.54  
5.53  
5.52  
5.51  
5.50  
5.49  
5.48  
5.47  
5.46  
5.45  
5.44  
5.43  
5.42  
5.41  
5.40  
5.39  
5.38  
5.37  
5.36  
5.35  
5.34  
5.33  
5.32  
5.31  
5.30  
5.29  
5.28  
5.27  
5.26  
5.25  
5.24  
5.23  
5.22  
5.21  
5.20  
5.19  
5.18  
5.17  
5.16  
5.15  
5.14  
5.13  
5.12  
5.11  
5.10  
5.09  
5.08  
5.07  
5.06  
5.05  
5.04  
5.03  
5.02  
5.01  
5.00

-3.02

1.18  
1.17  
1.16

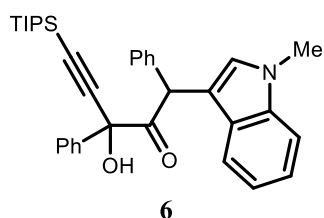

<sup>1</sup>H NMR, 400 M, CDCl<sub>3</sub>

dr = 7:1

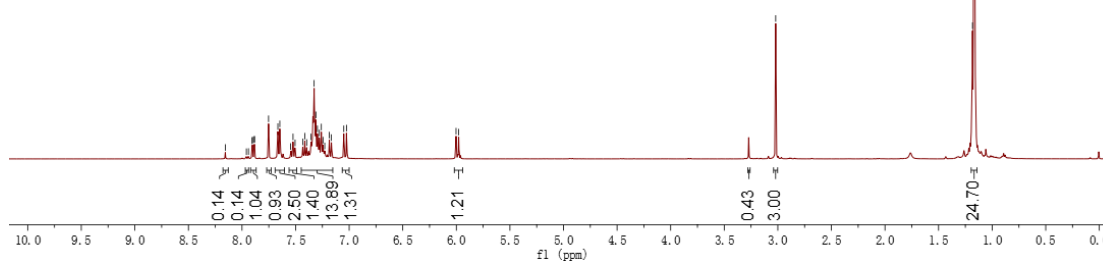

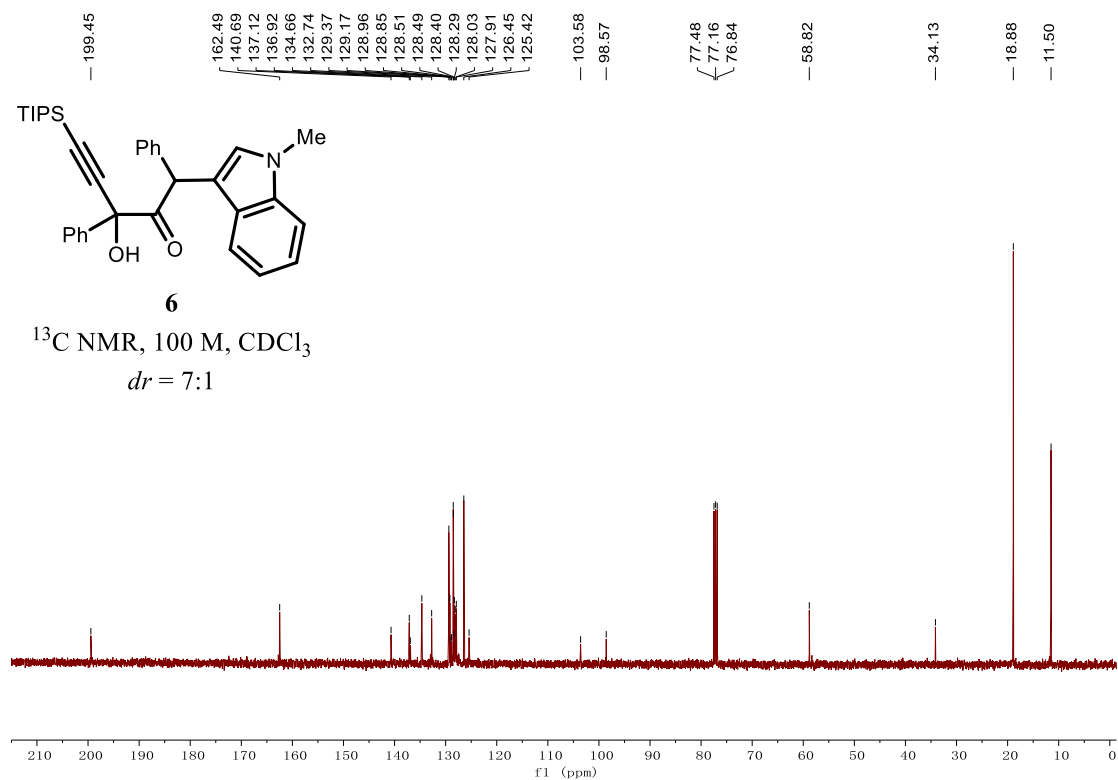

## HRMS spectrum

### Elemental Composition Report

Page 1

#### Single Mass Analysis

Tolerance = 5.0 mDa / DBE: min = -1.5, max = 50.0

Element prediction: Off

Number of isotope peaks used for i-FIT = 3

Monoisotopic Mass, Even Electron Ions

4784 formula(e) evaluated with 1 results within limits (up to 50 best isotopic matches for each mass)

Elements Used:

C: 35-35 H: 41-41 N: 0-100 O: 0-100 Si: 1-3 Na: 0-2

46

250809-1-15 16 (0.109)

1: TOF MS ES+  
6.61e+005

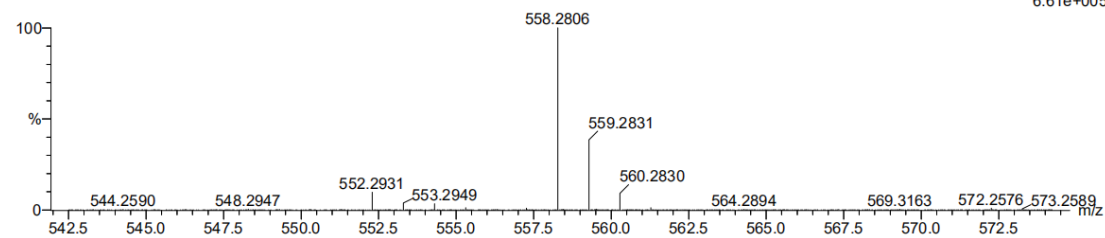

Minimum: -1.5  
Maximum: 50.0

| Mass     | Calc. Mass | mDa | PPM | DBE  | i-FIT | Norm | Conf (%) | Formula            |
|----------|------------|-----|-----|------|-------|------|----------|--------------------|
| 558.2806 | 558.2804   | 0.2 | 0.4 | 16.5 | 741.4 | n/a  | n/a      | C35 H41 N O2 Si Na |

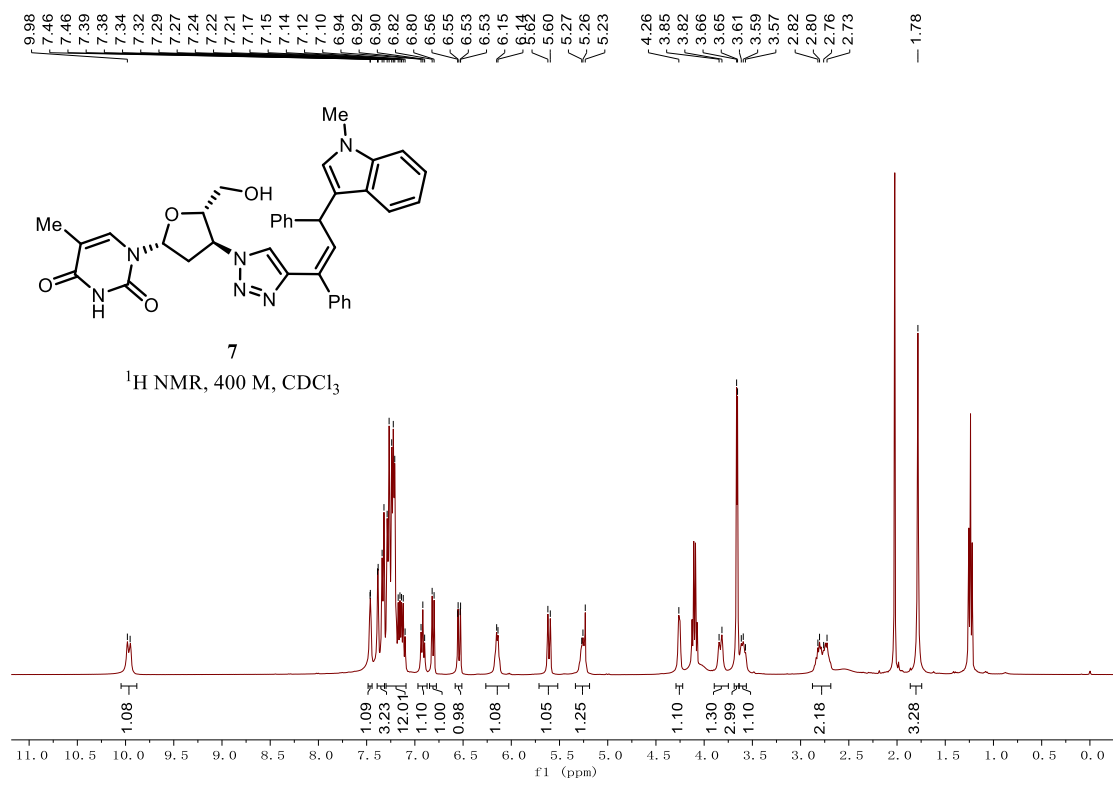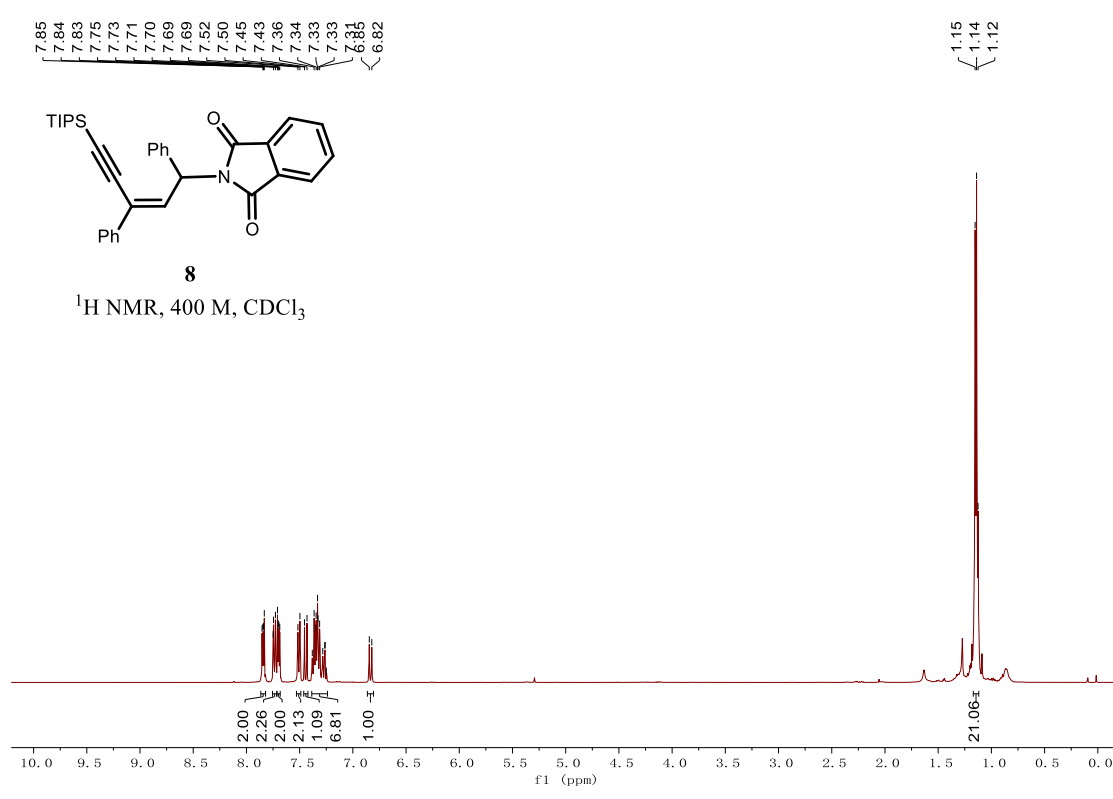

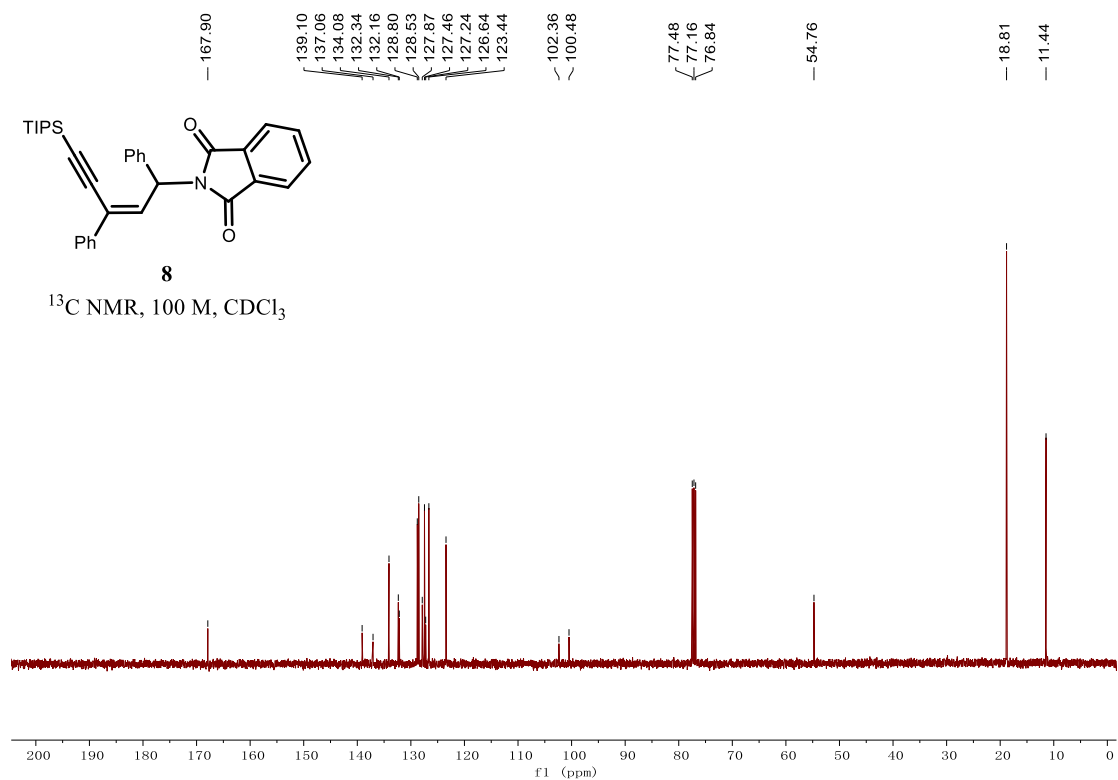

## HRMS spectrum

### Single Mass Analysis

Tolerance = 5.0 mDa / DBE: min = -1.5, max = 50.0

Element prediction: Off

Number of isotope peaks used for i-FIT = 3

Monoisotopic Mass, Even Electron Ions

4485 formula(e) evaluated with 1 results within limits (up to 50 best isotopic matches for each mass)

Elements Used:

C: 34-34 H: 37-37 N: 0-100 O: 0-100 Na: 0-2 Si: 1-3

46

250809-1-19 24 (0.151)

1: TOF MS ES+  
3.63e+005

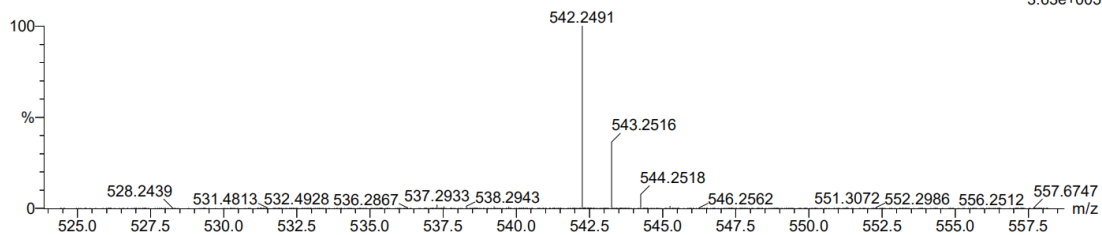

Minimum: -1.5  
Maximum: 5.0 10.0 50.0

| Mass     | Calc. Mass | mDa | PPM | DBE  | i-FIT | Norm | Conf (%) | Formula                                                                                       |
|----------|------------|-----|-----|------|-------|------|----------|-----------------------------------------------------------------------------------------------|
| 542.2491 | 542.2491   | 0.0 | 0.0 | 17.5 | 567.6 | n/a  | n/a      | C <sub>34</sub> H <sub>37</sub> N <sub>0</sub> O <sub>2</sub> Na <sub>1</sub> Si <sub>1</sub> |

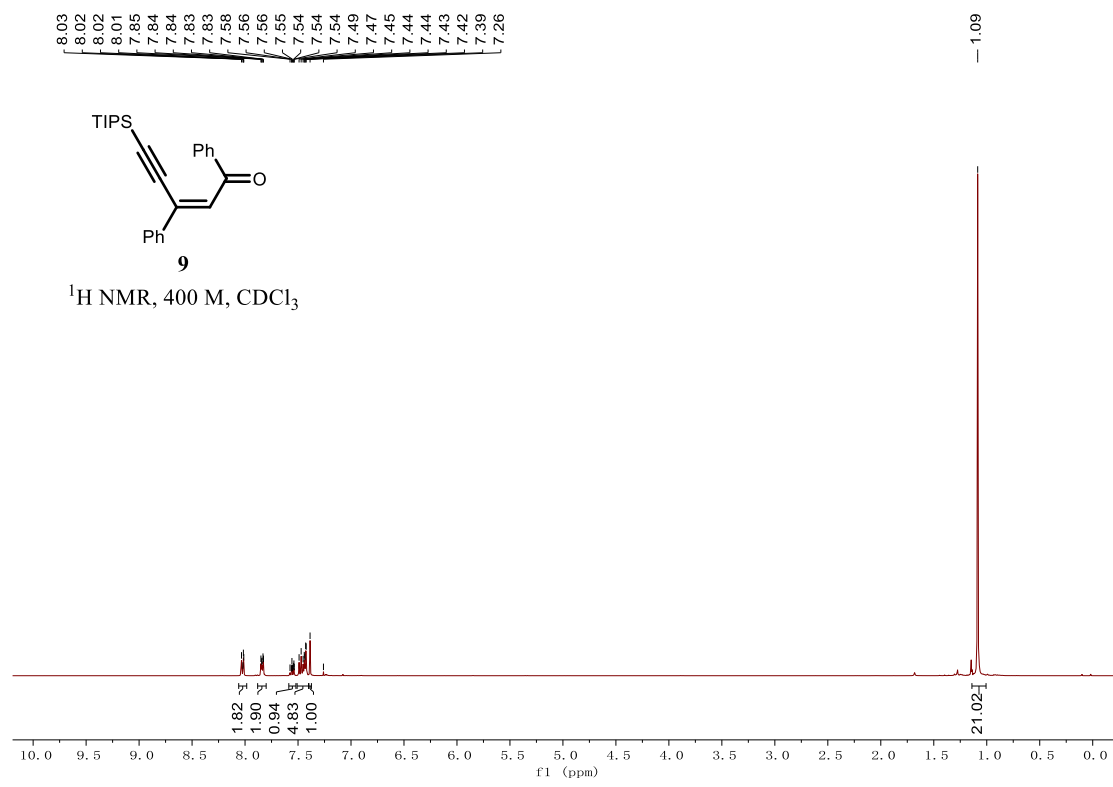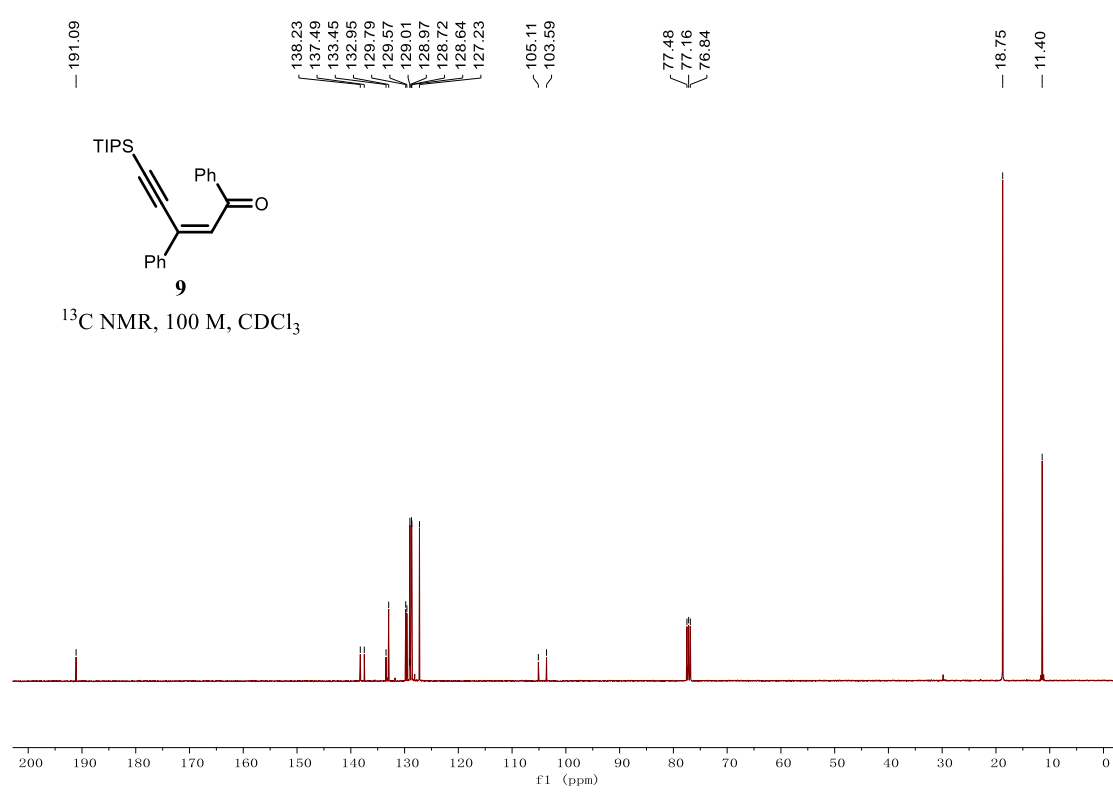

# HRMS spectrum

## Elemental Composition Report

Page 1

### Single Mass Analysis

Tolerance = 5.0 mDa / DBE: min = -1.5, max = 50.0

Element prediction: Off

Number of isotope peaks used for i-FIT = 3

Monoisotopic Mass, Even Electron Ions

2124 formula(e) evaluated with 1 results within limits (up to 50 best isotopic matches for each mass)

Elements Used:

C: 26-26 H: 33-33 N: 0-100 O: 0-100 Na: 0-2 Si: 1-3

46

250809-1-17 22 (0.140)

1: TOF MS ES+  
1.80e+006

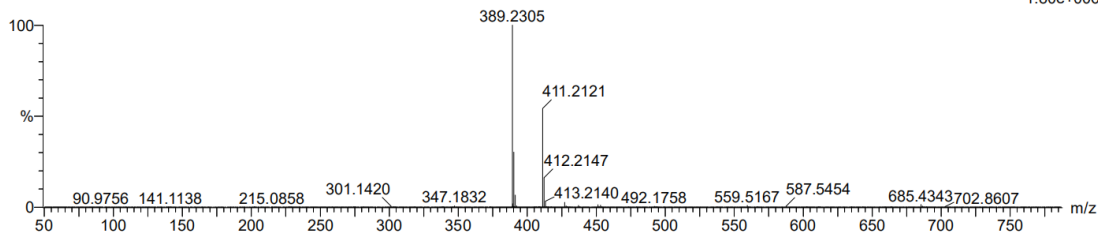

Minimum: -1.5

Maximum: 5.0 10.0 50.0

| Mass     | Calc. Mass | mDa | PPM | DBE  | i-FIT | Norm | Conf (%) | Formula                              |
|----------|------------|-----|-----|------|-------|------|----------|--------------------------------------|
| 389.2305 | 389.2301   | 0.4 | 1.0 | 11.5 | 890.9 | n/a  | n/a      | C <sub>26</sub> H <sub>33</sub> O Si |

## 9 References

D. Luo, S. Niu, F. Gong, C. Xu, S. Lan, J. Liu, S. Yang, X. Fang, *ACS Catal.* 2024, **14**, 2746–2757.
